# Supplementary material for: Predicting Biological Functions of Compounds Based on Chemical-Chemical Interactions
Source: PubMed Central journal article supplement (PMC3248422; doi:10.1371/journal.pone.0029491), 2011-12-29
Supplement: pone.0029491.s001.pdf [file pone.0029491.s001.pdf]

Table S1. Each order predicted metabolic pathway class for the collected 5,549 compounds without known metabolic pathway classes. The predicted metabolic pathway class code corresponds to the code in table 1. Among the 11 predicted pathway classes, the first 2 order predicted metabolic pathway classes should be paid more attention to.

| KEGG Ligand | Each order predicted metabolic pathway class |                 |                 |                 |                 |                 |                 |                 |                 |                  |                  |
|-------------|----------------------------------------------|-----------------|-----------------|-----------------|-----------------|-----------------|-----------------|-----------------|-----------------|------------------|------------------|
|             | 1 <sup>st</sup>                              | 2 <sup>nd</sup> | 3 <sup>rd</sup> | 4 <sup>th</sup> | 5 <sup>th</sup> | 6 <sup>th</sup> | 7 <sup>th</sup> | 8 <sup>th</sup> | 9 <sup>th</sup> | 10 <sup>th</sup> | 11 <sup>th</sup> |
| C03926      | 2                                            | 8               | 10              | 7               | 3               | 4               | 6               | 1               | 5               | 9                | 11               |
| C14600      | 3                                            | 11              | 2               | 6               | 4               | 8               | 5               | 10              | 9               | 7                | 1                |
| C07192      | 11                                           | 10              | 2               | 5               | 4               | 7               | 1               | 6               | 3               | 8                | 9                |
| C05314      | 5                                            | 9               | 1               | 10              | 2               | 11              | 8               | 3               | 6               | 4                | 7                |
| C12271      | 10                                           | 6               | 3               | 9               | 8               | 2               | 4               | 1               | 11              | 7                | 5                |
| C11018      | 11                                           | 10              | 9               | 2               | 6               | 5               | 3               | 4               | 8               | 7                | 1                |
| C14188      | 11                                           | 2               | 4               | 10              | 6               | 5               | 8               | 3               | 9               | 7                | 1                |
| C00027      | 5                                            | 1               | 8               | 10              | 11              | 6               | 2               | 3               | 4               | 9                | 7                |
| C03673      | 2                                            | 7               | 8               | 6               | 5               | 4               | 11              | 3               | 9               | 1                | 10               |
| C10980      | 11                                           | 9               | 2               | 10              | 5               | 8               | 3               | 1               | 6               | 7                | 4                |
| C15560      | 3                                            | 6               | 8               | 2               | 11              | 10              | 1               | 5               | 9               | 4                | 7                |
| C08178      | 3                                            | 5               | 11              | 10              | 7               | 4               | 2               | 1               | 9               | 8                | 6                |
| C10213      | 11                                           | 10              | 5               | 8               | 1               | 3               | 7               | 9               | 4               | 6                | 2                |
| C15415      | 11                                           | 6               | 9               | 7               | 1               | 10              | 8               | 2               | 3               | 4                | 5                |
| C03868      | 1                                            | 10              | 9               | 4               | 5               | 3               | 2               | 8               | 11              | 6                | 7                |
| C14673      | 11                                           | 5               | 10              | 8               | 7               | 2               | 3               | 1               | 6               | 9                | 4                |
| C06843      | 8                                            | 1               | 5               | 2               | 9               | 3               | 11              | 7               | 6               | 10               | 4                |
| C01505      | 3                                            | 5               | 10              | 4               | 9               | 8               | 6               | 7               | 11              | 2                | 1                |
| C09013      | 11                                           | 4               | 9               | 8               | 10              | 3               | 1               | 2               | 6               | 7                | 5                |
| C12091      | 3                                            | 1               | 5               | 2               | 9               | 4               | 10              | 7               | 6               | 8                | 11               |
| C08558      | 3                                            | 10              | 6               | 1               | 5               | 11              | 2               | 8               | 4               | 7                | 9                |
| C13830      | 10                                           | 3               | 4               | 1               | 7               | 8               | 6               | 9               | 11              | 2                | 5                |
| C07919      | 10                                           | 5               | 2               | 11              | 8               | 7               | 4               | 1               | 3               | 6                | 9                |
| C08777      | 9                                            | 5               | 6               | 11              | 2               | 3               | 1               | 8               | 10              | 7                | 4                |
| C03846      | 6                                            | 8               | 1               | 5               | 10              | 2               | 9               | 4               | 3               | 7                | 11               |
| C08050      | 9                                            | 10              | 11              | 5               | 8               | 2               | 7               | 6               | 3               | 4                | 1                |
| C00985      | 1                                            | 5               | 2               | 8               | 3               | 11              | 6               | 10              | 9               | 4                | 7                |
| C01705      | 5                                            | 11              | 6               | 2               | 1               | 3               | 10              | 9               | 8               | 7                | 4                |
| C08438      | 4                                            | 6               | 11              | 10              | 9               | 2               | 8               | 3               | 7               | 5                | 1                |
| C12326      | 10                                           | 2               | 8               | 5               | 6               | 9               | 3               | 11              | 1               | 4                | 7                |
| C12649      | 1                                            | 5               | 2               | 11              | 6               | 8               | 3               | 10              | 9               | 4                | 7                |
| C12849      | 11                                           | 5               | 1               | 10              | 8               | 4               | 9               | 2               | 3               | 7                | 6                |
| C04741      | 3                                            | 10              | 4               | 2               | 5               | 9               | 6               | 8               | 1               | 11               | 7                |
| C07546      | 1                                            | 10              | 5               | 11              | 2               | 6               | 9               | 7               | 4               | 3                | 8                |
| C04132      | 1                                            | 2               | 5               | 10              | 4               | 6               | 11              | 3               | 9               | 8                | 7                |
| C08042      | 10                                           | 9               | 8               | 11              | 2               | 1               | 5               | 4               | 3               | 6                | 7                |

|        |    |    |    |    |    |    |    |    |    |    |    |
|--------|----|----|----|----|----|----|----|----|----|----|----|
| C14466 | 11 | 3  | 5  | 8  | 9  | 6  | 7  | 4  | 1  | 2  | 10 |
| C08699 | 10 | 11 | 5  | 6  | 8  | 1  | 9  | 3  | 2  | 4  | 7  |
| C10827 | 10 | 9  | 3  | 11 | 5  | 1  | 8  | 6  | 7  | 2  | 4  |
| C00619 | 3  | 9  | 2  | 10 | 7  | 4  | 8  | 1  | 11 | 6  | 5  |
| C01945 | 11 | 4  | 2  | 10 | 3  | 1  | 5  | 9  | 8  | 6  | 7  |
| C11309 | 3  | 10 | 1  | 2  | 4  | 5  | 9  | 11 | 6  | 7  | 8  |
| C05421 | 9  | 8  | 2  | 3  | 6  | 5  | 11 | 10 | 4  | 7  | 1  |
| C03070 | 3  | 2  | 8  | 11 | 1  | 10 | 5  | 7  | 9  | 4  | 6  |
| C14162 | 5  | 1  | 2  | 8  | 6  | 11 | 4  | 9  | 3  | 10 | 7  |
| C12066 | 9  | 2  | 10 | 4  | 7  | 11 | 8  | 3  | 6  | 1  | 5  |
| C15664 | 11 | 7  | 5  | 6  | 10 | 9  | 3  | 8  | 4  | 2  | 1  |
| C07567 | 10 | 5  | 11 | 2  | 3  | 4  | 9  | 1  | 8  | 6  | 7  |
| C08831 | 10 | 3  | 9  | 2  | 11 | 8  | 1  | 6  | 7  | 5  | 4  |
| C10121 | 10 | 11 | 4  | 9  | 5  | 3  | 1  | 2  | 8  | 6  | 7  |
| C06268 | 2  | 6  | 11 | 8  | 1  | 5  | 4  | 7  | 10 | 9  | 3  |
| C08728 | 5  | 2  | 6  | 4  | 11 | 10 | 8  | 1  | 3  | 9  | 7  |
| C00661 | 1  | 2  | 5  | 8  | 6  | 9  | 3  | 4  | 11 | 10 | 7  |
| C10971 | 5  | 6  | 8  | 2  | 3  | 7  | 10 | 1  | 11 | 4  | 9  |
| C02117 | 2  | 8  | 11 | 6  | 9  | 7  | 3  | 1  | 10 | 4  | 5  |
| C09644 | 9  | 11 | 3  | 5  | 2  | 7  | 4  | 1  | 8  | 6  | 10 |
| C11337 | 11 | 10 | 9  | 5  | 4  | 8  | 2  | 3  | 7  | 1  | 6  |
| C07864 | 10 | 4  | 5  | 8  | 11 | 2  | 3  | 6  | 9  | 7  | 1  |
| C06430 | 1  | 8  | 10 | 6  | 11 | 4  | 3  | 9  | 5  | 2  | 7  |
| C11254 | 9  | 10 | 11 | 4  | 6  | 5  | 2  | 1  | 3  | 7  | 8  |
| C14678 | 11 | 3  | 8  | 4  | 2  | 10 | 5  | 7  | 9  | 1  | 6  |
| C03995 | 11 | 2  | 10 | 5  | 7  | 6  | 8  | 3  | 4  | 9  | 1  |
| C10030 | 10 | 3  | 9  | 11 | 5  | 8  | 6  | 1  | 7  | 4  | 2  |
| C13400 | 11 | 9  | 10 | 5  | 4  | 7  | 3  | 2  | 1  | 6  | 8  |
| C04500 | 1  | 4  | 7  | 10 | 9  | 6  | 5  | 3  | 2  | 11 | 8  |
| C12236 | 2  | 10 | 11 | 8  | 4  | 1  | 3  | 9  | 5  | 7  | 6  |
| C14754 | 10 | 3  | 9  | 5  | 8  | 7  | 4  | 6  | 11 | 2  | 1  |
| C06453 | 8  | 5  | 2  | 1  | 6  | 11 | 9  | 4  | 3  | 10 | 7  |
| C06595 | 11 | 1  | 5  | 10 | 9  | 6  | 2  | 3  | 4  | 8  | 7  |
| C09525 | 5  | 6  | 7  | 11 | 10 | 3  | 9  | 8  | 2  | 1  | 4  |
| C03093 | 10 | 9  | 1  | 4  | 3  | 11 | 2  | 6  | 8  | 7  | 5  |
| C14830 | 1  | 6  | 8  | 2  | 7  | 10 | 5  | 9  | 4  | 11 | 3  |
| C10536 | 10 | 5  | 8  | 7  | 11 | 3  | 4  | 1  | 2  | 6  | 9  |
| C11356 | 9  | 8  | 2  | 3  | 6  | 5  | 1  | 11 | 7  | 4  | 10 |
| C07500 | 5  | 11 | 6  | 8  | 1  | 2  | 10 | 4  | 9  | 7  | 3  |
| C07451 | 5  | 1  | 3  | 9  | 8  | 11 | 4  | 7  | 6  | 2  | 10 |
| C03963 | 3  | 4  | 9  | 1  | 5  | 10 | 11 | 6  | 2  | 7  | 8  |
| C07258 | 10 | 5  | 11 | 2  | 3  | 8  | 4  | 6  | 9  | 7  | 1  |
| C14494 | 11 | 10 | 2  | 5  | 3  | 8  | 7  | 4  | 6  | 1  | 9  |

|        |    |    |    |    |    |    |    |    |    |    |    |
|--------|----|----|----|----|----|----|----|----|----|----|----|
| C00732 | 1  | 3  | 2  | 5  | 10 | 9  | 6  | 7  | 11 | 4  | 8  |
| C15181 | 10 | 3  | 1  | 4  | 2  | 11 | 8  | 6  | 7  | 5  | 9  |
| C01136 | 1  | 5  | 2  | 6  | 11 | 8  | 3  | 9  | 4  | 10 | 7  |
| C02441 | 2  | 11 | 5  | 6  | 8  | 1  | 4  | 3  | 10 | 9  | 7  |
| C03136 | 1  | 5  | 2  | 8  | 10 | 6  | 3  | 11 | 9  | 4  | 7  |
| C03430 | 10 | 1  | 11 | 2  | 6  | 4  | 5  | 3  | 8  | 9  | 7  |
| C11344 | 11 | 2  | 3  | 9  | 1  | 5  | 10 | 8  | 6  | 7  | 4  |
| C05195 | 11 | 5  | 8  | 3  | 1  | 2  | 9  | 10 | 6  | 4  | 7  |
| C11591 | 1  | 2  | 5  | 6  | 11 | 8  | 4  | 10 | 9  | 3  | 7  |
| C15439 | 11 | 7  | 2  | 6  | 5  | 10 | 3  | 4  | 9  | 1  | 8  |
| C13744 | 4  | 10 | 2  | 5  | 3  | 9  | 8  | 1  | 6  | 7  | 11 |
| C03850 | 2  | 8  | 1  | 4  | 5  | 6  | 10 | 9  | 7  | 3  | 11 |
| C03665 | 5  | 6  | 1  | 8  | 10 | 2  | 4  | 3  | 7  | 11 | 9  |
| C04535 | 11 | 5  | 2  | 1  | 4  | 8  | 6  | 10 | 3  | 7  | 9  |
| C08089 | 2  | 1  | 7  | 3  | 4  | 6  | 5  | 9  | 8  | 11 | 10 |
| C12058 | 3  | 9  | 5  | 1  | 6  | 11 | 8  | 2  | 7  | 4  | 10 |
| C15472 | 6  | 11 | 1  | 3  | 5  | 10 | 7  | 8  | 9  | 4  | 2  |
| C00713 | 1  | 10 | 8  | 6  | 11 | 5  | 3  | 7  | 4  | 2  | 9  |
| C04638 | 9  | 2  | 4  | 1  | 6  | 10 | 5  | 7  | 3  | 8  | 11 |
| C15566 | 5  | 10 | 8  | 11 | 3  | 2  | 1  | 4  | 9  | 6  | 7  |
| C09438 | 10 | 9  | 4  | 6  | 11 | 5  | 3  | 7  | 1  | 8  | 2  |
| C05317 | 5  | 9  | 10 | 4  | 8  | 3  | 11 | 1  | 6  | 7  | 2  |
| C00872 | 6  | 5  | 2  | 8  | 11 | 1  | 7  | 9  | 4  | 10 | 3  |
| C15985 | 2  | 7  | 6  | 8  | 9  | 1  | 10 | 11 | 3  | 4  | 5  |
| C07970 | 11 | 10 | 9  | 6  | 8  | 5  | 1  | 2  | 7  | 3  | 4  |
| C10621 | 6  | 5  | 8  | 10 | 1  | 2  | 7  | 3  | 4  | 9  | 11 |
| C14563 | 11 | 6  | 7  | 3  | 8  | 10 | 1  | 9  | 2  | 5  | 4  |
| C03209 | 11 | 5  | 8  | 1  | 9  | 2  | 4  | 3  | 6  | 10 | 7  |
| C13790 | 3  | 8  | 2  | 7  | 9  | 10 | 1  | 5  | 11 | 6  | 4  |
| C07336 | 11 | 8  | 5  | 6  | 9  | 10 | 3  | 7  | 2  | 1  | 4  |
| C08080 | 3  | 11 | 5  | 9  | 6  | 4  | 8  | 7  | 1  | 10 | 2  |
| C15538 | 3  | 9  | 1  | 11 | 6  | 2  | 5  | 8  | 7  | 4  | 10 |
| C07516 | 5  | 11 | 10 | 1  | 6  | 2  | 4  | 3  | 9  | 7  | 8  |
| C06942 | 9  | 11 | 6  | 1  | 4  | 3  | 2  | 7  | 5  | 8  | 10 |
| C07315 | 10 | 9  | 11 | 8  | 5  | 6  | 2  | 3  | 1  | 4  | 7  |
| C01557 | 10 | 2  | 8  | 5  | 6  | 9  | 3  | 11 | 4  | 7  | 1  |
| C09266 | 10 | 1  | 2  | 5  | 11 | 6  | 9  | 7  | 3  | 4  | 8  |
| C10018 | 10 | 11 | 5  | 3  | 2  | 1  | 9  | 8  | 6  | 7  | 4  |
| C14522 | 11 | 5  | 2  | 9  | 8  | 1  | 4  | 6  | 10 | 3  | 7  |
| C09135 | 3  | 1  | 10 | 7  | 9  | 6  | 11 | 2  | 4  | 8  | 5  |
| C10833 | 10 | 11 | 5  | 8  | 1  | 2  | 3  | 9  | 7  | 6  | 4  |
| C12946 | 5  | 9  | 8  | 3  | 6  | 10 | 1  | 2  | 4  | 7  | 11 |
| C14671 | 3  | 4  | 6  | 2  | 5  | 1  | 9  | 7  | 11 | 8  | 10 |

|        |    |    |    |    |    |    |    |    |    |    |    |
|--------|----|----|----|----|----|----|----|----|----|----|----|
| C14757 | 3  | 11 | 10 | 1  | 5  | 9  | 8  | 7  | 4  | 2  | 6  |
| C09577 | 10 | 1  | 5  | 7  | 3  | 2  | 8  | 11 | 4  | 9  | 6  |
| C07911 | 5  | 10 | 9  | 11 | 8  | 2  | 1  | 7  | 3  | 4  | 6  |
| C10075 | 1  | 5  | 10 | 7  | 9  | 8  | 3  | 4  | 11 | 2  | 6  |
| C02009 | 5  | 10 | 2  | 11 | 8  | 9  | 7  | 1  | 4  | 6  | 3  |
| C11335 | 2  | 5  | 8  | 4  | 3  | 6  | 7  | 10 | 1  | 11 | 9  |
| C02808 | 1  | 4  | 11 | 7  | 8  | 2  | 3  | 10 | 9  | 6  | 5  |
| C07601 | 10 | 5  | 2  | 1  | 4  | 7  | 6  | 3  | 11 | 9  | 8  |
| C10146 | 5  | 10 | 9  | 11 | 4  | 6  | 8  | 3  | 1  | 7  | 2  |
| C10275 | 10 | 1  | 11 | 5  | 8  | 2  | 9  | 6  | 3  | 7  | 4  |
| C14480 | 4  | 6  | 8  | 11 | 2  | 5  | 9  | 10 | 7  | 1  | 3  |
| C10450 | 10 | 5  | 11 | 2  | 7  | 3  | 9  | 6  | 8  | 1  | 4  |
| C10882 | 3  | 10 | 8  | 5  | 1  | 11 | 9  | 6  | 4  | 7  | 2  |
| C14675 | 3  | 5  | 1  | 2  | 7  | 8  | 10 | 9  | 11 | 4  | 6  |
| C08713 | 9  | 1  | 4  | 6  | 10 | 3  | 2  | 7  | 5  | 8  | 11 |
| C15018 | 3  | 9  | 2  | 4  | 6  | 10 | 11 | 5  | 8  | 1  | 7  |
| C10479 | 1  | 10 | 8  | 9  | 7  | 4  | 6  | 2  | 3  | 5  | 11 |
| C03797 | 2  | 4  | 9  | 8  | 6  | 5  | 11 | 1  | 10 | 3  | 7  |
| C14537 | 11 | 1  | 4  | 2  | 7  | 5  | 3  | 9  | 10 | 6  | 8  |
| C07366 | 3  | 11 | 2  | 10 | 6  | 1  | 5  | 8  | 9  | 7  | 4  |
| C09209 | 11 | 5  | 10 | 1  | 4  | 3  | 6  | 2  | 8  | 9  | 7  |
| C13856 | 3  | 6  | 10 | 1  | 8  | 11 | 5  | 2  | 9  | 7  | 4  |
| C08873 | 9  | 6  | 7  | 5  | 10 | 4  | 3  | 11 | 2  | 8  | 1  |
| C15722 | 9  | 10 | 11 | 4  | 8  | 7  | 2  | 3  | 6  | 5  | 1  |
| C08666 | 9  | 11 | 2  | 10 | 4  | 1  | 3  | 6  | 7  | 8  | 5  |
| C08835 | 9  | 2  | 6  | 7  | 5  | 8  | 10 | 11 | 3  | 4  | 1  |
| C09775 | 1  | 10 | 9  | 11 | 5  | 8  | 3  | 7  | 2  | 6  | 4  |
| C14342 | 11 | 1  | 2  | 4  | 5  | 8  | 9  | 7  | 3  | 10 | 6  |
| C12343 | 10 | 11 | 5  | 3  | 2  | 7  | 1  | 9  | 6  | 8  | 4  |
| C11487 | 11 | 5  | 1  | 2  | 9  | 7  | 4  | 3  | 10 | 6  | 8  |
| C13741 | 1  | 2  | 4  | 5  | 8  | 9  | 10 | 3  | 7  | 11 | 6  |
| C13440 | 10 | 11 | 3  | 2  | 1  | 5  | 4  | 6  | 9  | 7  | 8  |
| C15502 | 5  | 2  | 1  | 6  | 8  | 11 | 4  | 7  | 9  | 3  | 10 |
| C01453 | 1  | 10 | 5  | 3  | 8  | 11 | 9  | 4  | 6  | 2  | 7  |
| C03651 | 5  | 2  | 6  | 8  | 1  | 10 | 11 | 3  | 4  | 9  | 7  |
| C04350 | 5  | 10 | 1  | 6  | 11 | 9  | 4  | 8  | 3  | 7  | 2  |
| C10251 | 11 | 2  | 5  | 9  | 1  | 4  | 3  | 10 | 8  | 7  | 6  |
| C02917 | 1  | 2  | 8  | 6  | 11 | 3  | 5  | 9  | 4  | 10 | 7  |
| C08321 | 3  | 1  | 6  | 10 | 4  | 7  | 11 | 5  | 8  | 2  | 9  |
| C12685 | 6  | 1  | 8  | 11 | 5  | 2  | 10 | 9  | 4  | 3  | 7  |
| C08400 | 10 | 5  | 6  | 7  | 4  | 2  | 1  | 9  | 3  | 11 | 8  |
| C04634 | 11 | 5  | 7  | 1  | 6  | 9  | 2  | 8  | 4  | 3  | 10 |
| C03141 | 5  | 8  | 11 | 10 | 3  | 2  | 4  | 6  | 1  | 9  | 7  |

|        |    |    |    |    |    |    |    |    |    |    |    |
|--------|----|----|----|----|----|----|----|----|----|----|----|
| C09113 | 3  | 9  | 8  | 6  | 7  | 11 | 10 | 1  | 5  | 2  | 4  |
| C12008 | 6  | 10 | 7  | 1  | 5  | 2  | 8  | 4  | 9  | 3  | 11 |
| C12034 | 9  | 7  | 6  | 8  | 11 | 4  | 1  | 3  | 2  | 5  | 10 |
| C12272 | 3  | 5  | 10 | 8  | 6  | 1  | 11 | 4  | 7  | 2  | 9  |
| C08463 | 11 | 4  | 6  | 3  | 5  | 10 | 9  | 8  | 7  | 1  | 2  |
| C11191 | 10 | 5  | 11 | 6  | 3  | 1  | 8  | 2  | 7  | 4  | 9  |
| C03147 | 3  | 5  | 6  | 8  | 11 | 9  | 1  | 10 | 7  | 4  | 2  |
| C00946 | 4  | 2  | 8  | 1  | 9  | 10 | 7  | 6  | 11 | 5  | 3  |
| C04354 | 2  | 8  | 4  | 10 | 5  | 9  | 3  | 1  | 6  | 11 | 7  |
| C00216 | 1  | 2  | 8  | 5  | 4  | 6  | 11 | 10 | 9  | 7  | 3  |
| C09785 | 9  | 3  | 5  | 2  | 6  | 8  | 11 | 4  | 7  | 10 | 1  |
| C10623 | 11 | 9  | 7  | 6  | 1  | 4  | 3  | 10 | 8  | 2  | 5  |
| C11585 | 10 | 3  | 1  | 5  | 2  | 4  | 11 | 8  | 7  | 6  | 9  |
| C14217 | 11 | 7  | 4  | 6  | 3  | 8  | 10 | 5  | 1  | 9  | 2  |
| C09843 | 9  | 11 | 4  | 5  | 8  | 3  | 1  | 2  | 6  | 10 | 7  |
| C14182 | 5  | 7  | 9  | 8  | 11 | 4  | 3  | 1  | 2  | 6  | 10 |
| C02518 | 11 | 4  | 5  | 8  | 2  | 10 | 3  | 9  | 1  | 7  | 6  |
| C02970 | 1  | 2  | 9  | 8  | 7  | 4  | 5  | 6  | 3  | 11 | 10 |
| C12512 | 3  | 1  | 8  | 11 | 6  | 2  | 5  | 10 | 7  | 4  | 9  |
| C12679 | 10 | 4  | 1  | 2  | 3  | 9  | 5  | 8  | 6  | 7  | 11 |
| C11055 | 3  | 1  | 8  | 10 | 4  | 7  | 11 | 9  | 2  | 6  | 5  |
| C14484 | 11 | 3  | 1  | 4  | 7  | 5  | 8  | 2  | 10 | 6  | 9  |
| C15718 | 8  | 10 | 6  | 11 | 5  | 9  | 3  | 7  | 4  | 1  | 2  |
| C09089 | 5  | 10 | 1  | 11 | 6  | 3  | 8  | 9  | 4  | 2  | 7  |
| C06018 | 1  | 9  | 10 | 4  | 7  | 11 | 3  | 5  | 8  | 2  | 6  |
| C00796 | 10 | 8  | 11 | 2  | 6  | 5  | 1  | 9  | 3  | 7  | 4  |
| C01486 | 2  | 8  | 5  | 6  | 11 | 4  | 1  | 9  | 7  | 10 | 3  |
| C09595 | 10 | 4  | 9  | 11 | 5  | 2  | 7  | 8  | 6  | 3  | 1  |
| C13810 | 3  | 4  | 9  | 1  | 5  | 8  | 11 | 6  | 2  | 10 | 7  |
| C10328 | 10 | 2  | 8  | 6  | 9  | 1  | 4  | 11 | 7  | 3  | 5  |
| C00306 | 10 | 3  | 9  | 2  | 5  | 8  | 4  | 6  | 11 | 7  | 1  |
| C08158 | 3  | 11 | 5  | 6  | 1  | 8  | 10 | 7  | 4  | 9  | 2  |
| C02467 | 1  | 10 | 9  | 7  | 4  | 3  | 8  | 5  | 6  | 11 | 2  |
| C11189 | 9  | 8  | 10 | 11 | 5  | 3  | 4  | 2  | 6  | 1  | 7  |
| C15389 | 11 | 6  | 7  | 9  | 10 | 5  | 8  | 3  | 1  | 2  | 4  |
| C06912 | 9  | 10 | 11 | 4  | 6  | 3  | 2  | 7  | 1  | 5  | 8  |
| C11215 | 1  | 2  | 6  | 8  | 5  | 4  | 11 | 9  | 10 | 7  | 3  |
| C14488 | 3  | 9  | 7  | 10 | 4  | 2  | 11 | 1  | 8  | 6  | 5  |
| C11054 | 9  | 6  | 10 | 7  | 2  | 11 | 5  | 3  | 4  | 8  | 1  |
| C15636 | 3  | 6  | 2  | 10 | 5  | 8  | 1  | 7  | 11 | 4  | 9  |
| C01604 | 1  | 10 | 5  | 6  | 2  | 11 | 8  | 3  | 7  | 4  | 9  |
| C01545 | 9  | 11 | 3  | 2  | 5  | 8  | 1  | 10 | 6  | 7  | 4  |
| C10164 | 5  | 11 | 8  | 10 | 2  | 9  | 1  | 6  | 3  | 4  | 7  |

|        |    |    |    |    |    |    |    |    |    |    |    |
|--------|----|----|----|----|----|----|----|----|----|----|----|
| C10482 | 10 | 5  | 7  | 9  | 6  | 8  | 1  | 3  | 4  | 2  | 11 |
| C07953 | 11 | 10 | 6  | 5  | 3  | 1  | 4  | 2  | 8  | 7  | 9  |
| C02294 | 5  | 6  | 2  | 10 | 4  | 11 | 9  | 1  | 8  | 7  | 3  |
| C10076 | 10 | 11 | 4  | 6  | 3  | 2  | 5  | 9  | 1  | 8  | 7  |
| C04291 | 2  | 6  | 8  | 5  | 11 | 3  | 1  | 10 | 7  | 9  | 4  |
| C08825 | 3  | 2  | 6  | 8  | 9  | 10 | 4  | 11 | 5  | 1  | 7  |
| C13858 | 3  | 6  | 4  | 1  | 9  | 8  | 2  | 7  | 10 | 11 | 5  |
| C07895 | 10 | 11 | 2  | 6  | 7  | 3  | 5  | 4  | 9  | 8  | 1  |
| C13254 | 5  | 10 | 1  | 7  | 8  | 2  | 3  | 6  | 11 | 9  | 4  |
| C11043 | 11 | 3  | 10 | 9  | 2  | 8  | 1  | 4  | 5  | 6  | 7  |
| C10533 | 10 | 3  | 11 | 1  | 8  | 5  | 4  | 9  | 7  | 6  | 2  |
| C09061 | 9  | 8  | 11 | 10 | 3  | 6  | 4  | 5  | 2  | 7  | 1  |
| C13664 | 5  | 10 | 11 | 2  | 6  | 1  | 8  | 9  | 3  | 7  | 4  |
| C14737 | 11 | 9  | 4  | 2  | 1  | 3  | 7  | 10 | 6  | 8  | 5  |
| C09240 | 10 | 11 | 7  | 1  | 9  | 4  | 3  | 2  | 6  | 8  | 5  |
| C12338 | 11 | 2  | 1  | 8  | 9  | 10 | 3  | 7  | 5  | 6  | 4  |
| C10545 | 10 | 3  | 9  | 11 | 5  | 2  | 7  | 4  | 6  | 1  | 8  |
| C04561 | 2  | 6  | 8  | 7  | 1  | 11 | 3  | 9  | 4  | 10 | 5  |
| C13980 | 1  | 10 | 5  | 3  | 7  | 6  | 9  | 4  | 2  | 11 | 8  |
| C14707 | 11 | 8  | 4  | 5  | 10 | 2  | 6  | 7  | 3  | 9  | 1  |
| C01742 | 1  | 10 | 5  | 8  | 6  | 2  | 9  | 11 | 3  | 7  | 4  |
| C15761 | 6  | 2  | 4  | 9  | 3  | 11 | 10 | 7  | 5  | 1  | 8  |
| C08679 | 9  | 2  | 11 | 8  | 4  | 3  | 7  | 6  | 5  | 1  | 10 |
| C07633 | 9  | 5  | 8  | 10 | 4  | 2  | 6  | 7  | 11 | 1  | 3  |
| C08415 | 10 | 9  | 5  | 1  | 11 | 6  | 8  | 7  | 3  | 2  | 4  |
| C01488 | 1  | 2  | 8  | 9  | 4  | 10 | 7  | 6  | 3  | 5  | 11 |
| C10059 | 9  | 10 | 11 | 1  | 4  | 3  | 5  | 7  | 2  | 8  | 6  |
| C09800 | 9  | 1  | 10 | 2  | 8  | 11 | 6  | 3  | 7  | 4  | 5  |
| C10992 | 5  | 11 | 8  | 3  | 4  | 1  | 6  | 7  | 10 | 9  | 2  |
| C07713 | 10 | 3  | 5  | 2  | 4  | 6  | 1  | 8  | 9  | 11 | 7  |
| C11490 | 2  | 11 | 6  | 5  | 10 | 7  | 4  | 8  | 3  | 9  | 1  |
| C14376 | 3  | 10 | 2  | 8  | 5  | 11 | 4  | 9  | 6  | 7  | 1  |
| C07146 | 5  | 10 | 3  | 2  | 6  | 7  | 9  | 8  | 4  | 11 | 1  |
| C07673 | 11 | 1  | 5  | 8  | 10 | 2  | 4  | 9  | 6  | 3  | 7  |
| C13666 | 10 | 5  | 11 | 8  | 1  | 9  | 6  | 3  | 2  | 4  | 7  |
| C11468 | 8  | 9  | 5  | 1  | 7  | 6  | 11 | 3  | 2  | 4  | 10 |
| C02942 | 3  | 5  | 10 | 6  | 2  | 11 | 8  | 1  | 9  | 4  | 7  |
| C09021 | 10 | 5  | 7  | 2  | 8  | 1  | 3  | 9  | 6  | 4  | 11 |
| C10744 | 3  | 5  | 9  | 10 | 7  | 8  | 11 | 4  | 6  | 1  | 2  |
| C15678 | 9  | 10 | 11 | 8  | 3  | 1  | 5  | 2  | 6  | 7  | 4  |
| C07536 | 2  | 8  | 11 | 1  | 6  | 10 | 5  | 4  | 9  | 3  | 7  |
| C08796 | 3  | 10 | 6  | 9  | 5  | 1  | 4  | 8  | 11 | 2  | 7  |
| C00767 | 1  | 8  | 2  | 5  | 9  | 11 | 10 | 3  | 6  | 7  | 4  |

|        |    |    |    |    |    |    |    |    |    |    |    |
|--------|----|----|----|----|----|----|----|----|----|----|----|
| C01425 | 6  | 9  | 5  | 8  | 11 | 7  | 4  | 2  | 1  | 10 | 3  |
| C04485 | 2  | 7  | 9  | 1  | 8  | 6  | 5  | 10 | 11 | 3  | 4  |
| C16216 | 3  | 7  | 9  | 6  | 1  | 5  | 10 | 2  | 11 | 8  | 4  |
| C07344 | 2  | 8  | 6  | 10 | 9  | 1  | 7  | 5  | 4  | 3  | 11 |
| C08972 | 1  | 10 | 9  | 4  | 5  | 3  | 2  | 6  | 11 | 8  | 7  |
| C09921 | 3  | 5  | 2  | 9  | 6  | 4  | 11 | 8  | 7  | 10 | 1  |
| C13779 | 2  | 1  | 7  | 5  | 4  | 3  | 8  | 9  | 10 | 6  | 11 |
| C13414 | 3  | 5  | 6  | 2  | 4  | 7  | 9  | 11 | 10 | 8  | 1  |
| C15655 | 1  | 3  | 8  | 10 | 2  | 11 | 7  | 4  | 5  | 6  | 9  |
| C11257 | 9  | 10 | 11 | 8  | 6  | 4  | 3  | 1  | 2  | 5  | 7  |
| C06932 | 10 | 5  | 6  | 7  | 11 | 3  | 9  | 2  | 4  | 1  | 8  |
| C04025 | 1  | 5  | 2  | 11 | 6  | 8  | 10 | 3  | 4  | 9  | 7  |
| C02057 | 5  | 1  | 2  | 6  | 8  | 10 | 11 | 4  | 9  | 3  | 7  |
| C02007 | 9  | 10 | 4  | 6  | 3  | 2  | 11 | 1  | 5  | 8  | 7  |
| C04830 | 9  | 1  | 4  | 3  | 8  | 10 | 11 | 2  | 7  | 5  | 6  |
| C09093 | 9  | 4  | 6  | 2  | 3  | 10 | 8  | 5  | 7  | 1  | 11 |
| C09870 | 9  | 11 | 5  | 10 | 8  | 7  | 3  | 1  | 2  | 4  | 6  |
| C01677 | 4  | 9  | 11 | 5  | 10 | 1  | 2  | 8  | 7  | 6  | 3  |
| C01799 | 5  | 6  | 8  | 10 | 2  | 1  | 4  | 7  | 9  | 3  | 11 |
| C03855 | 1  | 9  | 3  | 10 | 8  | 2  | 4  | 7  | 5  | 11 | 6  |
| C14451 | 11 | 5  | 8  | 10 | 2  | 1  | 4  | 9  | 7  | 6  | 3  |
| C15630 | 3  | 8  | 9  | 7  | 6  | 5  | 4  | 11 | 10 | 2  | 1  |
| C07473 | 10 | 5  | 1  | 4  | 6  | 8  | 2  | 3  | 11 | 7  | 9  |
| C00505 | 10 | 9  | 1  | 5  | 6  | 2  | 11 | 4  | 7  | 3  | 8  |
| C10824 | 10 | 5  | 3  | 7  | 2  | 8  | 4  | 9  | 11 | 6  | 1  |
| C15641 | 10 | 6  | 5  | 3  | 11 | 2  | 9  | 7  | 4  | 8  | 1  |
| C11764 | 11 | 10 | 6  | 2  | 9  | 5  | 1  | 4  | 3  | 8  | 7  |
| C13478 | 3  | 4  | 11 | 5  | 10 | 9  | 8  | 7  | 6  | 1  | 2  |
| C14385 | 11 | 10 | 5  | 8  | 2  | 9  | 4  | 7  | 3  | 1  | 6  |
| C08392 | 10 | 3  | 8  | 5  | 1  | 9  | 6  | 7  | 4  | 11 | 2  |
| C04453 | 2  | 6  | 1  | 8  | 4  | 11 | 5  | 10 | 9  | 7  | 3  |
| C02996 | 3  | 5  | 10 | 11 | 4  | 6  | 9  | 2  | 1  | 7  | 8  |
| C13716 | 1  | 6  | 5  | 11 | 10 | 2  | 4  | 9  | 3  | 7  | 8  |
| C02827 | 1  | 2  | 10 | 4  | 8  | 5  | 3  | 6  | 11 | 9  | 7  |
| C12033 | 5  | 11 | 8  | 9  | 6  | 10 | 7  | 2  | 1  | 3  | 4  |
| C14761 | 11 | 1  | 5  | 6  | 2  | 8  | 10 | 4  | 3  | 7  | 9  |
| C14718 | 5  | 11 | 8  | 1  | 3  | 2  | 7  | 9  | 6  | 10 | 4  |
| C08369 | 10 | 9  | 5  | 11 | 8  | 2  | 3  | 6  | 7  | 1  | 4  |
| C09561 | 10 | 3  | 1  | 4  | 2  | 5  | 9  | 6  | 11 | 8  | 7  |
| C02560 | 1  | 11 | 2  | 5  | 8  | 3  | 6  | 9  | 4  | 10 | 7  |
| C14465 | 11 | 3  | 5  | 4  | 7  | 9  | 10 | 1  | 6  | 8  | 2  |
| C00348 | 1  | 9  | 7  | 4  | 10 | 3  | 2  | 6  | 8  | 5  | 11 |
| C06839 | 10 | 9  | 6  | 5  | 1  | 7  | 4  | 8  | 3  | 11 | 2  |

|        |    |    |    |    |    |    |    |    |    |    |    |
|--------|----|----|----|----|----|----|----|----|----|----|----|
| C07115 | 11 | 5  | 6  | 2  | 4  | 10 | 3  | 9  | 1  | 8  | 7  |
| C14640 | 3  | 9  | 11 | 10 | 2  | 7  | 8  | 1  | 5  | 4  | 6  |
| C04108 | 3  | 9  | 1  | 10 | 6  | 2  | 5  | 11 | 8  | 7  | 4  |
| C14485 | 3  | 9  | 5  | 4  | 2  | 8  | 1  | 7  | 11 | 6  | 10 |
| C09651 | 10 | 6  | 9  | 7  | 5  | 1  | 2  | 8  | 3  | 11 | 4  |
| C14561 | 11 | 2  | 5  | 8  | 7  | 9  | 3  | 4  | 6  | 10 | 1  |
| C14353 | 11 | 5  | 4  | 7  | 1  | 8  | 3  | 10 | 9  | 2  | 6  |
| C10090 | 10 | 4  | 11 | 9  | 5  | 7  | 6  | 3  | 2  | 1  | 8  |
| C06963 | 5  | 6  | 1  | 4  | 11 | 7  | 9  | 3  | 10 | 8  | 2  |
| C03154 | 3  | 5  | 6  | 11 | 9  | 8  | 1  | 2  | 7  | 10 | 4  |
| C11091 | 11 | 5  | 9  | 10 | 6  | 2  | 8  | 7  | 4  | 3  | 1  |
| C10156 | 10 | 11 | 7  | 4  | 1  | 3  | 5  | 9  | 2  | 6  | 8  |
| C14319 | 10 | 5  | 11 | 8  | 6  | 2  | 1  | 3  | 4  | 7  | 9  |
| C06356 | 2  | 8  | 5  | 6  | 3  | 1  | 11 | 9  | 4  | 10 | 7  |
| C05405 | 1  | 2  | 6  | 8  | 10 | 5  | 11 | 9  | 3  | 4  | 7  |
| C10677 | 10 | 8  | 9  | 1  | 3  | 2  | 7  | 4  | 11 | 6  | 5  |
| C10288 | 10 | 11 | 9  | 5  | 7  | 8  | 3  | 1  | 4  | 6  | 2  |
| C14231 | 10 | 6  | 9  | 11 | 5  | 3  | 4  | 7  | 1  | 2  | 8  |
| C01814 | 5  | 10 | 8  | 11 | 6  | 1  | 2  | 3  | 9  | 4  | 7  |
| C11624 | 3  | 1  | 11 | 9  | 2  | 8  | 7  | 6  | 5  | 10 | 4  |
| C13183 | 11 | 6  | 8  | 5  | 2  | 10 | 1  | 9  | 7  | 3  | 4  |
| C08031 | 9  | 10 | 3  | 5  | 1  | 2  | 8  | 11 | 6  | 7  | 4  |
| C04886 | 4  | 1  | 6  | 9  | 7  | 8  | 10 | 3  | 2  | 11 | 5  |
| C08647 | 10 | 1  | 8  | 5  | 9  | 11 | 4  | 3  | 6  | 2  | 7  |
| C10207 | 10 | 3  | 1  | 5  | 8  | 9  | 2  | 11 | 6  | 4  | 7  |
| C07177 | 10 | 9  | 1  | 11 | 6  | 5  | 7  | 3  | 4  | 2  | 8  |
| C15428 | 10 | 3  | 5  | 9  | 11 | 8  | 4  | 6  | 2  | 1  | 7  |
| C12328 | 10 | 1  | 8  | 2  | 6  | 5  | 9  | 11 | 3  | 4  | 7  |
| C08555 | 10 | 9  | 8  | 2  | 6  | 3  | 5  | 7  | 1  | 11 | 4  |
| C09705 | 9  | 11 | 3  | 10 | 2  | 5  | 6  | 1  | 4  | 7  | 8  |
| C08141 | 3  | 9  | 11 | 2  | 10 | 8  | 5  | 1  | 6  | 7  | 4  |
| C16438 | 5  | 6  | 2  | 1  | 10 | 8  | 4  | 9  | 11 | 7  | 3  |
| C11374 | 4  | 2  | 11 | 5  | 6  | 1  | 7  | 8  | 9  | 3  | 10 |
| C11721 | 4  | 3  | 5  | 9  | 6  | 10 | 11 | 7  | 8  | 2  | 1  |
| C07334 | 10 | 9  | 1  | 5  | 6  | 11 | 4  | 3  | 7  | 2  | 8  |
| C08817 | 3  | 9  | 8  | 11 | 6  | 4  | 1  | 5  | 10 | 7  | 2  |
| C06808 | 5  | 2  | 6  | 11 | 4  | 1  | 8  | 10 | 3  | 7  | 9  |
| C10804 | 11 | 1  | 8  | 5  | 4  | 9  | 3  | 2  | 10 | 6  | 7  |
| C04064 | 1  | 10 | 7  | 2  | 9  | 6  | 4  | 3  | 11 | 8  | 5  |
| C11702 | 11 | 4  | 5  | 10 | 8  | 3  | 6  | 1  | 2  | 9  | 7  |
| C12122 | 10 | 6  | 5  | 1  | 8  | 9  | 2  | 7  | 3  | 4  | 11 |
| C02536 | 3  | 7  | 8  | 9  | 2  | 5  | 11 | 6  | 1  | 10 | 4  |
| C12995 | 1  | 3  | 11 | 4  | 2  | 5  | 9  | 6  | 8  | 10 | 7  |



|        |    |    |    |    |    |    |    |    |    |    |    |
|--------|----|----|----|----|----|----|----|----|----|----|----|
| C14526 | 11 | 8  | 2  | 4  | 9  | 6  | 5  | 10 | 1  | 3  | 7  |
| C13715 | 5  | 10 | 11 | 3  | 8  | 4  | 7  | 9  | 1  | 6  | 2  |
| C13752 | 2  | 4  | 3  | 7  | 6  | 1  | 11 | 10 | 9  | 5  | 8  |
| C00586 | 1  | 2  | 10 | 5  | 6  | 8  | 9  | 4  | 3  | 11 | 7  |
| C01779 | 2  | 8  | 10 | 6  | 9  | 3  | 11 | 5  | 4  | 7  | 1  |
| C02567 | 6  | 5  | 8  | 2  | 10 | 3  | 11 | 1  | 9  | 4  | 7  |
| C14172 | 3  | 9  | 8  | 2  | 10 | 6  | 1  | 11 | 4  | 5  | 7  |
| C04581 | 5  | 9  | 10 | 3  | 1  | 7  | 6  | 8  | 11 | 2  | 4  |
| C10512 | 1  | 7  | 10 | 11 | 8  | 4  | 3  | 2  | 9  | 6  | 5  |
| C04486 | 2  | 6  | 8  | 1  | 9  | 7  | 3  | 5  | 4  | 11 | 10 |
| C14742 | 11 | 2  | 9  | 5  | 3  | 10 | 6  | 7  | 1  | 8  | 4  |
| C09139 | 10 | 5  | 4  | 6  | 2  | 3  | 9  | 7  | 11 | 8  | 1  |
| C10956 | 10 | 5  | 2  | 4  | 9  | 6  | 3  | 8  | 7  | 1  | 11 |
| C10739 | 10 | 1  | 3  | 2  | 8  | 6  | 4  | 11 | 9  | 5  | 7  |
| C11373 | 1  | 10 | 2  | 4  | 9  | 5  | 8  | 7  | 6  | 3  | 11 |
| C09754 | 8  | 1  | 6  | 11 | 2  | 4  | 3  | 9  | 7  | 5  | 10 |
| C09527 | 3  | 9  | 2  | 6  | 5  | 7  | 11 | 8  | 1  | 10 | 4  |
| C08363 | 3  | 2  | 8  | 6  | 1  | 9  | 10 | 7  | 5  | 4  | 11 |
| C09708 | 1  | 11 | 8  | 10 | 7  | 3  | 6  | 5  | 4  | 2  | 9  |
| C08545 | 2  | 10 | 9  | 8  | 5  | 7  | 11 | 1  | 3  | 6  | 4  |
| C03214 | 5  | 2  | 8  | 1  | 3  | 6  | 11 | 4  | 9  | 10 | 7  |
| C15991 | 1  | 2  | 10 | 5  | 4  | 7  | 8  | 6  | 9  | 11 | 3  |
| C10733 | 10 | 3  | 11 | 9  | 6  | 5  | 1  | 8  | 2  | 7  | 4  |
| C00566 | 2  | 1  | 9  | 5  | 3  | 6  | 4  | 11 | 7  | 8  | 10 |
| C15261 | 3  | 1  | 5  | 11 | 10 | 7  | 4  | 8  | 9  | 2  | 6  |
| C14712 | 11 | 2  | 9  | 5  | 3  | 7  | 4  | 6  | 1  | 10 | 8  |
| C14177 | 4  | 5  | 9  | 2  | 10 | 6  | 3  | 8  | 11 | 7  | 1  |
| C14701 | 2  | 8  | 11 | 6  | 5  | 1  | 10 | 9  | 3  | 4  | 7  |
| C14604 | 11 | 2  | 5  | 10 | 1  | 7  | 6  | 3  | 4  | 9  | 8  |
| C11030 | 11 | 10 | 9  | 2  | 5  | 8  | 7  | 3  | 4  | 6  | 1  |
| C09652 | 9  | 10 | 4  | 3  | 7  | 6  | 5  | 8  | 1  | 2  | 11 |
| C07119 | 3  | 9  | 11 | 1  | 2  | 6  | 7  | 8  | 10 | 5  | 4  |
| C11608 | 3  | 1  | 5  | 7  | 8  | 11 | 2  | 9  | 6  | 10 | 4  |
| C06502 | 4  | 2  | 1  | 8  | 10 | 9  | 11 | 6  | 3  | 5  | 7  |
| C11162 | 10 | 8  | 9  | 5  | 6  | 4  | 3  | 1  | 11 | 7  | 2  |
| C08803 | 10 | 2  | 11 | 9  | 8  | 4  | 6  | 3  | 5  | 7  | 1  |
| C01275 | 11 | 2  | 8  | 1  | 5  | 9  | 6  | 3  | 7  | 10 | 4  |
| C06343 | 2  | 8  | 10 | 5  | 11 | 9  | 1  | 3  | 7  | 6  | 4  |
| C11180 | 11 | 3  | 1  | 10 | 2  | 9  | 8  | 4  | 5  | 7  | 6  |
| C00611 | 1  | 4  | 2  | 9  | 3  | 10 | 7  | 5  | 11 | 6  | 8  |
| C02311 | 10 | 1  | 6  | 11 | 8  | 4  | 2  | 5  | 9  | 7  | 3  |
| C07343 | 5  | 1  | 8  | 2  | 6  | 11 | 9  | 4  | 3  | 10 | 7  |
| C14343 | 11 | 10 | 9  | 6  | 3  | 8  | 2  | 1  | 4  | 7  | 5  |

|        |    |    |    |    |    |    |    |    |    |    |    |
|--------|----|----|----|----|----|----|----|----|----|----|----|
| C08730 | 10 | 11 | 5  | 8  | 2  | 3  | 1  | 7  | 9  | 6  | 4  |
| C12230 | 10 | 3  | 9  | 2  | 1  | 4  | 7  | 11 | 6  | 5  | 8  |
| C10254 | 10 | 5  | 3  | 6  | 1  | 8  | 2  | 11 | 9  | 4  | 7  |
| C01593 | 8  | 2  | 11 | 7  | 9  | 6  | 3  | 5  | 4  | 10 | 1  |
| C12056 | 5  | 1  | 2  | 4  | 10 | 11 | 9  | 3  | 6  | 8  | 7  |
| C15631 | 1  | 3  | 9  | 10 | 8  | 4  | 11 | 6  | 7  | 5  | 2  |
| C03051 | 3  | 2  | 8  | 6  | 5  | 1  | 4  | 10 | 7  | 9  | 11 |
| C02912 | 1  | 2  | 8  | 6  | 11 | 3  | 5  | 9  | 4  | 10 | 7  |
| C07866 | 5  | 10 | 8  | 11 | 2  | 7  | 4  | 9  | 3  | 1  | 6  |
| C14329 | 11 | 9  | 2  | 6  | 5  | 8  | 7  | 3  | 10 | 1  | 4  |
| C00896 | 10 | 9  | 5  | 11 | 8  | 2  | 6  | 3  | 1  | 4  | 7  |
| C09182 | 9  | 5  | 10 | 1  | 2  | 6  | 7  | 4  | 3  | 8  | 11 |
| C13558 | 1  | 2  | 3  | 11 | 5  | 6  | 10 | 8  | 4  | 9  | 7  |
| C03853 | 3  | 1  | 9  | 10 | 11 | 8  | 2  | 4  | 6  | 5  | 7  |
| C10101 | 2  | 8  | 3  | 11 | 1  | 9  | 6  | 4  | 10 | 7  | 5  |
| C11022 | 6  | 7  | 2  | 9  | 1  | 8  | 11 | 10 | 3  | 5  | 4  |
| C06881 | 10 | 1  | 9  | 6  | 11 | 5  | 4  | 7  | 3  | 2  | 8  |
| C08350 | 1  | 2  | 11 | 3  | 8  | 9  | 4  | 5  | 10 | 6  | 7  |
| C06863 | 10 | 11 | 2  | 5  | 1  | 3  | 4  | 6  | 9  | 8  | 7  |
| C09466 | 9  | 5  | 10 | 11 | 2  | 8  | 4  | 6  | 3  | 7  | 1  |
| C00308 | 5  | 2  | 6  | 1  | 10 | 8  | 7  | 3  | 9  | 4  | 11 |
| C09520 | 10 | 3  | 6  | 1  | 9  | 5  | 11 | 2  | 7  | 8  | 4  |
| C09767 | 10 | 1  | 9  | 3  | 4  | 6  | 8  | 5  | 11 | 7  | 2  |
| C10255 | 10 | 8  | 5  | 2  | 9  | 11 | 4  | 3  | 1  | 7  | 6  |
| C10387 | 10 | 11 | 9  | 5  | 6  | 8  | 2  | 3  | 4  | 7  | 1  |
| C07383 | 10 | 11 | 4  | 7  | 5  | 3  | 2  | 6  | 1  | 8  | 9  |
| C14272 | 9  | 11 | 1  | 5  | 3  | 2  | 6  | 4  | 7  | 10 | 8  |
| C03387 | 1  | 8  | 2  | 5  | 6  | 7  | 4  | 9  | 3  | 11 | 10 |
| C15702 | 10 | 9  | 1  | 11 | 2  | 3  | 8  | 6  | 5  | 7  | 4  |
| C13962 | 11 | 2  | 1  | 5  | 4  | 9  | 10 | 8  | 6  | 3  | 7  |
| C07521 | 5  | 11 | 1  | 10 | 3  | 4  | 2  | 6  | 7  | 9  | 8  |
| C11092 | 9  | 7  | 5  | 4  | 2  | 1  | 8  | 3  | 11 | 6  | 10 |
| C02201 | 11 | 10 | 1  | 5  | 8  | 2  | 9  | 3  | 4  | 6  | 7  |
| C11803 | 10 | 5  | 11 | 4  | 3  | 1  | 6  | 2  | 7  | 8  | 9  |
| C10290 | 1  | 2  | 10 | 5  | 6  | 8  | 7  | 4  | 3  | 11 | 9  |
| C12020 | 9  | 10 | 4  | 1  | 7  | 5  | 6  | 3  | 11 | 2  | 8  |
| C06918 | 5  | 10 | 6  | 11 | 2  | 8  | 7  | 3  | 9  | 1  | 4  |
| C10250 | 10 | 11 | 3  | 2  | 5  | 6  | 8  | 1  | 4  | 9  | 7  |
| C13089 | 10 | 5  | 1  | 6  | 8  | 4  | 11 | 3  | 7  | 2  | 9  |
| C11214 | 1  | 11 | 5  | 2  | 6  | 8  | 3  | 10 | 4  | 7  | 9  |
| C08212 | 3  | 5  | 11 | 1  | 9  | 4  | 6  | 2  | 8  | 10 | 7  |
| C06384 | 2  | 5  | 4  | 6  | 8  | 11 | 1  | 7  | 9  | 3  | 10 |
| C07022 | 10 | 5  | 2  | 3  | 4  | 1  | 6  | 9  | 11 | 7  | 8  |

|        |    |    |    |    |    |    |    |    |    |    |    |
|--------|----|----|----|----|----|----|----|----|----|----|----|
| C08258 | 1  | 10 | 3  | 4  | 9  | 6  | 5  | 8  | 2  | 11 | 7  |
| C08483 | 11 | 5  | 9  | 1  | 7  | 10 | 3  | 8  | 4  | 6  | 2  |
| C01034 | 3  | 5  | 10 | 7  | 1  | 9  | 11 | 6  | 4  | 2  | 8  |
| C06346 | 10 | 5  | 9  | 11 | 3  | 8  | 2  | 6  | 4  | 1  | 7  |
| C14001 | 9  | 10 | 6  | 5  | 11 | 8  | 7  | 1  | 3  | 2  | 4  |
| C03134 | 1  | 2  | 11 | 8  | 3  | 4  | 6  | 5  | 10 | 9  | 7  |
| C06631 | 9  | 5  | 3  | 10 | 4  | 7  | 11 | 2  | 6  | 8  | 1  |
| C07425 | 5  | 10 | 3  | 11 | 6  | 1  | 7  | 9  | 8  | 4  | 2  |
| C10618 | 8  | 11 | 2  | 6  | 10 | 1  | 3  | 7  | 5  | 9  | 4  |
| C09023 | 9  | 11 | 8  | 7  | 5  | 2  | 3  | 6  | 1  | 4  | 10 |
| C07311 | 3  | 11 | 7  | 2  | 8  | 6  | 1  | 5  | 9  | 4  | 10 |
| C06514 | 10 | 5  | 9  | 2  | 1  | 11 | 3  | 4  | 8  | 7  | 6  |
| C07254 | 3  | 1  | 8  | 2  | 11 | 9  | 10 | 7  | 4  | 6  | 5  |
| C15765 | 3  | 5  | 1  | 9  | 10 | 6  | 7  | 2  | 4  | 11 | 8  |
| C14575 | 11 | 1  | 4  | 10 | 2  | 8  | 9  | 6  | 7  | 3  | 5  |
| C06665 | 10 | 9  | 5  | 1  | 11 | 6  | 3  | 4  | 8  | 7  | 2  |
| C12639 | 10 | 5  | 6  | 1  | 2  | 7  | 8  | 11 | 3  | 4  | 9  |
| C11213 | 9  | 10 | 3  | 11 | 4  | 6  | 7  | 8  | 5  | 1  | 2  |
| C10237 | 10 | 11 | 3  | 6  | 2  | 7  | 5  | 1  | 9  | 8  | 4  |
| C10759 | 11 | 5  | 9  | 10 | 3  | 4  | 2  | 7  | 1  | 6  | 8  |
| C00803 | 1  | 11 | 2  | 5  | 3  | 8  | 6  | 9  | 4  | 10 | 7  |
| C10948 | 11 | 3  | 6  | 9  | 1  | 5  | 2  | 10 | 8  | 4  | 7  |
| C07241 | 10 | 5  | 11 | 3  | 4  | 8  | 1  | 9  | 2  | 7  | 6  |
| C07509 | 11 | 10 | 5  | 2  | 1  | 4  | 7  | 9  | 3  | 6  | 8  |
| C08059 | 9  | 10 | 11 | 8  | 5  | 2  | 7  | 4  | 3  | 1  | 6  |
| C01602 | 5  | 1  | 6  | 2  | 10 | 8  | 4  | 11 | 9  | 3  | 7  |
| C11222 | 6  | 9  | 5  | 10 | 11 | 3  | 8  | 4  | 1  | 2  | 7  |
| C15711 | 1  | 9  | 10 | 5  | 6  | 7  | 3  | 4  | 11 | 2  | 8  |
| C02253 | 8  | 2  | 5  | 1  | 3  | 9  | 4  | 10 | 6  | 7  | 11 |
| C01173 | 3  | 11 | 6  | 2  | 4  | 8  | 5  | 9  | 1  | 10 | 7  |
| C12603 | 1  | 2  | 5  | 11 | 6  | 10 | 4  | 9  | 8  | 3  | 7  |
| C03401 | 5  | 11 | 8  | 6  | 2  | 4  | 1  | 9  | 10 | 3  | 7  |
| C10392 | 10 | 11 | 9  | 6  | 4  | 2  | 3  | 1  | 8  | 7  | 5  |
| C03975 | 8  | 5  | 2  | 10 | 9  | 4  | 11 | 7  | 6  | 3  | 1  |
| C14248 | 11 | 9  | 1  | 3  | 5  | 4  | 7  | 8  | 10 | 2  | 6  |
| C15907 | 9  | 1  | 10 | 3  | 8  | 5  | 11 | 2  | 6  | 4  | 7  |
| C02116 | 2  | 8  | 11 | 1  | 3  | 10 | 6  | 4  | 9  | 5  | 7  |
| C04720 | 1  | 10 | 5  | 2  | 11 | 8  | 6  | 3  | 7  | 9  | 4  |
| C10774 | 10 | 2  | 5  | 1  | 9  | 4  | 8  | 6  | 11 | 3  | 7  |
| C11123 | 8  | 2  | 5  | 9  | 10 | 11 | 6  | 4  | 3  | 7  | 1  |
| C16347 | 9  | 8  | 11 | 7  | 10 | 4  | 6  | 1  | 3  | 5  | 2  |
| C09709 | 3  | 9  | 2  | 8  | 5  | 4  | 11 | 10 | 7  | 6  | 1  |
| C11188 | 11 | 6  | 9  | 4  | 8  | 2  | 7  | 10 | 3  | 1  | 5  |

|        |    |    |    |    |    |    |    |    |    |    |    |
|--------|----|----|----|----|----|----|----|----|----|----|----|
| C10027 | 11 | 10 | 4  | 7  | 2  | 3  | 6  | 1  | 8  | 5  | 9  |
| C09964 | 5  | 11 | 8  | 10 | 9  | 1  | 6  | 4  | 7  | 2  | 3  |
| C13707 | 11 | 1  | 3  | 6  | 4  | 9  | 5  | 10 | 7  | 8  | 2  |
| C03985 | 9  | 11 | 10 | 5  | 1  | 2  | 3  | 8  | 6  | 7  | 4  |
| C01015 | 5  | 2  | 6  | 8  | 1  | 10 | 11 | 3  | 4  | 9  | 7  |
| C01917 | 10 | 11 | 5  | 9  | 6  | 4  | 2  | 7  | 3  | 1  | 8  |
| C05343 | 11 | 5  | 8  | 2  | 9  | 1  | 10 | 6  | 7  | 4  | 3  |
| C05163 | 1  | 10 | 2  | 5  | 8  | 6  | 9  | 3  | 11 | 4  | 7  |
| C15624 | 3  | 5  | 7  | 6  | 10 | 11 | 4  | 2  | 8  | 9  | 1  |
| C09667 | 11 | 5  | 9  | 8  | 10 | 1  | 3  | 7  | 4  | 6  | 2  |
| C01625 | 1  | 2  | 8  | 11 | 6  | 5  | 4  | 7  | 9  | 3  | 10 |
| C14323 | 11 | 6  | 3  | 5  | 1  | 10 | 9  | 8  | 2  | 7  | 4  |
| C10726 | 11 | 10 | 3  | 5  | 7  | 8  | 2  | 1  | 6  | 9  | 4  |
| C04491 | 10 | 5  | 11 | 1  | 9  | 2  | 3  | 8  | 6  | 7  | 4  |
| C09985 | 2  | 5  | 6  | 4  | 8  | 7  | 1  | 3  | 9  | 11 | 10 |
| C09351 | 6  | 5  | 4  | 7  | 9  | 3  | 8  | 10 | 11 | 1  | 2  |
| C11341 | 5  | 11 | 10 | 6  | 1  | 7  | 2  | 4  | 3  | 8  | 9  |
| C07427 | 10 | 5  | 11 | 8  | 3  | 7  | 1  | 6  | 4  | 2  | 9  |
| C07665 | 11 | 2  | 10 | 5  | 9  | 4  | 8  | 1  | 7  | 3  | 6  |
| C08596 | 9  | 8  | 3  | 2  | 1  | 10 | 7  | 11 | 4  | 5  | 6  |
| C07584 | 10 | 8  | 11 | 7  | 2  | 3  | 6  | 5  | 9  | 1  | 4  |
| C01537 | 5  | 11 | 6  | 2  | 10 | 1  | 8  | 4  | 3  | 9  | 7  |
| C07104 | 5  | 10 | 11 | 8  | 9  | 4  | 3  | 6  | 7  | 1  | 2  |
| C08467 | 10 | 9  | 11 | 6  | 2  | 8  | 1  | 7  | 5  | 3  | 4  |
| C14267 | 11 | 10 | 8  | 3  | 4  | 9  | 5  | 7  | 1  | 6  | 2  |
| C15204 | 2  | 5  | 4  | 7  | 9  | 8  | 11 | 1  | 6  | 3  | 10 |
| C07740 | 10 | 5  | 2  | 9  | 1  | 11 | 4  | 3  | 8  | 7  | 6  |
| C09544 | 10 | 8  | 4  | 11 | 7  | 3  | 6  | 9  | 5  | 2  | 1  |
| C08975 | 10 | 9  | 11 | 6  | 4  | 3  | 8  | 5  | 2  | 1  | 7  |
| C06501 | 11 | 5  | 8  | 2  | 6  | 1  | 10 | 4  | 3  | 9  | 7  |
| C01171 | 1  | 2  | 4  | 9  | 10 | 8  | 3  | 7  | 6  | 5  | 11 |
| C07306 | 3  | 5  | 11 | 9  | 2  | 6  | 4  | 7  | 1  | 10 | 8  |
| C10184 | 10 | 5  | 11 | 1  | 8  | 2  | 9  | 7  | 3  | 4  | 6  |
| C09837 | 9  | 11 | 10 | 5  | 8  | 2  | 6  | 1  | 7  | 4  | 3  |
| C06312 | 1  | 2  | 6  | 8  | 9  | 5  | 4  | 10 | 3  | 7  | 11 |
| C13696 | 5  | 1  | 6  | 10 | 8  | 4  | 2  | 3  | 9  | 11 | 7  |
| C14448 | 1  | 11 | 5  | 4  | 2  | 3  | 10 | 6  | 9  | 8  | 7  |
| C07401 | 10 | 11 | 3  | 5  | 2  | 9  | 1  | 4  | 8  | 6  | 7  |
| C04698 | 1  | 2  | 8  | 9  | 10 | 6  | 7  | 4  | 5  | 3  | 11 |
| C02494 | 4  | 9  | 10 | 5  | 11 | 6  | 7  | 8  | 3  | 1  | 2  |
| C09978 | 11 | 6  | 1  | 9  | 2  | 10 | 5  | 4  | 3  | 8  | 7  |
| C11599 | 10 | 3  | 9  | 8  | 1  | 7  | 5  | 11 | 2  | 4  | 6  |
| C11735 | 5  | 2  | 8  | 10 | 1  | 11 | 4  | 6  | 7  | 3  | 9  |

|        |    |    |    |    |    |    |    |    |    |    |    |
|--------|----|----|----|----|----|----|----|----|----|----|----|
| C07930 | 4  | 8  | 7  | 6  | 5  | 2  | 3  | 1  | 11 | 9  | 10 |
| C09742 | 10 | 9  | 4  | 2  | 5  | 6  | 11 | 3  | 7  | 8  | 1  |
| C12078 | 9  | 11 | 3  | 10 | 6  | 5  | 8  | 2  | 1  | 4  | 7  |
| C02096 | 1  | 2  | 8  | 5  | 4  | 6  | 11 | 10 | 9  | 7  | 3  |
| C06999 | 5  | 9  | 3  | 4  | 11 | 6  | 2  | 10 | 1  | 7  | 8  |
| C11098 | 9  | 10 | 2  | 8  | 6  | 5  | 7  | 11 | 3  | 4  | 1  |
| C06849 | 5  | 10 | 11 | 7  | 4  | 2  | 3  | 9  | 6  | 1  | 8  |
| C00915 | 2  | 8  | 5  | 1  | 6  | 11 | 3  | 9  | 10 | 4  | 7  |
| C10698 | 10 | 3  | 1  | 5  | 2  | 7  | 4  | 6  | 11 | 8  | 9  |
| C14439 | 11 | 2  | 8  | 5  | 1  | 9  | 6  | 7  | 3  | 10 | 4  |
| C06078 | 9  | 11 | 2  | 8  | 1  | 3  | 6  | 5  | 10 | 7  | 4  |
| C15357 | 3  | 9  | 4  | 5  | 10 | 7  | 1  | 6  | 11 | 2  | 8  |
| C10197 | 10 | 2  | 5  | 3  | 8  | 1  | 6  | 4  | 7  | 11 | 9  |
| C14135 | 2  | 1  | 9  | 8  | 7  | 6  | 11 | 3  | 4  | 10 | 5  |
| C05230 | 2  | 8  | 6  | 9  | 10 | 7  | 11 | 1  | 4  | 3  | 5  |
| C07853 | 10 | 11 | 7  | 2  | 1  | 3  | 5  | 6  | 9  | 4  | 8  |
| C16440 | 5  | 6  | 1  | 2  | 10 | 8  | 4  | 9  | 11 | 3  | 7  |
| C14397 | 11 | 6  | 3  | 5  | 1  | 10 | 8  | 2  | 9  | 7  | 4  |
| C07322 | 10 | 5  | 11 | 2  | 3  | 8  | 9  | 6  | 4  | 1  | 7  |
| C11515 | 5  | 1  | 9  | 11 | 7  | 2  | 4  | 6  | 3  | 8  | 10 |
| C13823 | 11 | 8  | 1  | 2  | 5  | 9  | 4  | 10 | 3  | 7  | 6  |
| C01481 | 10 | 5  | 11 | 8  | 3  | 2  | 9  | 6  | 1  | 4  | 7  |
| C09090 | 9  | 10 | 5  | 3  | 1  | 7  | 4  | 11 | 6  | 2  | 8  |
| C02432 | 6  | 5  | 2  | 1  | 8  | 7  | 11 | 9  | 10 | 3  | 4  |
| C15455 | 1  | 5  | 2  | 8  | 6  | 4  | 10 | 3  | 11 | 9  | 7  |
| C02980 | 11 | 9  | 1  | 7  | 6  | 2  | 8  | 3  | 10 | 5  | 4  |
| C11626 | 10 | 9  | 11 | 5  | 8  | 3  | 6  | 2  | 4  | 7  | 1  |
| C09256 | 5  | 10 | 3  | 4  | 11 | 6  | 2  | 1  | 8  | 9  | 7  |
| C09219 | 10 | 9  | 11 | 1  | 5  | 8  | 2  | 3  | 4  | 7  | 6  |
| C06693 | 1  | 9  | 5  | 10 | 2  | 11 | 3  | 6  | 4  | 8  | 7  |
| C11146 | 2  | 8  | 5  | 4  | 6  | 11 | 1  | 9  | 10 | 7  | 3  |
| C15867 | 9  | 8  | 4  | 5  | 6  | 3  | 1  | 11 | 2  | 7  | 10 |
| C13745 | 4  | 10 | 2  | 8  | 9  | 5  | 6  | 1  | 3  | 7  | 11 |
| C08752 | 5  | 4  | 1  | 11 | 10 | 6  | 2  | 8  | 3  | 9  | 7  |
| C15037 | 2  | 8  | 11 | 6  | 9  | 10 | 4  | 7  | 3  | 5  | 1  |
| C08738 | 3  | 7  | 10 | 8  | 4  | 1  | 2  | 9  | 11 | 6  | 5  |
| C01823 | 6  | 5  | 1  | 9  | 3  | 11 | 2  | 10 | 4  | 7  | 8  |
| C14153 | 8  | 9  | 5  | 10 | 6  | 11 | 3  | 1  | 4  | 2  | 7  |
| C01379 | 1  | 2  | 9  | 4  | 10 | 3  | 11 | 7  | 8  | 6  | 5  |
| C04507 | 1  | 4  | 7  | 3  | 9  | 10 | 2  | 11 | 6  | 8  | 5  |
| C11168 | 5  | 10 | 11 | 8  | 1  | 6  | 4  | 7  | 2  | 3  | 9  |
| C03088 | 4  | 1  | 6  | 8  | 10 | 3  | 9  | 11 | 2  | 5  | 7  |
| C14454 | 11 | 5  | 2  | 3  | 8  | 1  | 4  | 6  | 9  | 7  | 10 |

|        |    |    |    |    |    |    |    |    |    |    |    |
|--------|----|----|----|----|----|----|----|----|----|----|----|
| C07253 | 11 | 10 | 5  | 1  | 3  | 8  | 7  | 6  | 2  | 9  | 4  |
| C10305 | 11 | 10 | 5  | 6  | 4  | 8  | 3  | 9  | 7  | 1  | 2  |
| C06967 | 5  | 10 | 1  | 4  | 6  | 2  | 11 | 9  | 3  | 7  | 8  |
| C11389 | 9  | 11 | 10 | 5  | 1  | 2  | 3  | 8  | 6  | 7  | 4  |
| C12021 | 6  | 7  | 8  | 2  | 5  | 9  | 3  | 11 | 4  | 10 | 1  |
| C03384 | 1  | 2  | 4  | 9  | 10 | 8  | 3  | 7  | 6  | 5  | 11 |
| C01911 | 1  | 2  | 3  | 5  | 8  | 9  | 6  | 4  | 10 | 11 | 7  |
| C13861 | 3  | 9  | 2  | 4  | 8  | 6  | 10 | 5  | 11 | 7  | 1  |
| C13610 | 3  | 2  | 4  | 7  | 11 | 9  | 5  | 1  | 8  | 10 | 6  |
| C13799 | 10 | 5  | 2  | 11 | 1  | 9  | 3  | 8  | 4  | 6  | 7  |
| C00070 | 1  | 2  | 8  | 11 | 5  | 6  | 10 | 4  | 9  | 3  | 7  |
| C15557 | 3  | 4  | 2  | 5  | 11 | 8  | 6  | 7  | 10 | 9  | 1  |
| C01292 | 6  | 2  | 3  | 8  | 1  | 4  | 10 | 7  | 11 | 9  | 5  |
| C08757 | 10 | 11 | 2  | 6  | 4  | 5  | 3  | 8  | 7  | 9  | 1  |
| C11255 | 8  | 2  | 11 | 1  | 5  | 3  | 10 | 6  | 4  | 7  | 9  |
| C13546 | 10 | 5  | 6  | 2  | 8  | 4  | 11 | 9  | 7  | 3  | 1  |
| C09155 | 1  | 3  | 6  | 2  | 11 | 4  | 5  | 10 | 8  | 9  | 7  |
| C15484 | 3  | 6  | 2  | 5  | 1  | 9  | 8  | 10 | 4  | 11 | 7  |
| C08335 | 6  | 2  | 8  | 11 | 1  | 5  | 3  | 10 | 7  | 9  | 4  |
| C14497 | 3  | 11 | 10 | 9  | 8  | 5  | 4  | 1  | 6  | 7  | 2  |
| C09385 | 10 | 11 | 3  | 2  | 9  | 4  | 5  | 7  | 6  | 1  | 8  |
| C14755 | 1  | 2  | 8  | 11 | 5  | 4  | 6  | 7  | 3  | 9  | 10 |
| C00873 | 6  | 5  | 11 | 1  | 7  | 10 | 8  | 9  | 3  | 2  | 4  |
| C07397 | 10 | 11 | 5  | 2  | 7  | 8  | 6  | 9  | 3  | 1  | 4  |
| C08390 | 2  | 5  | 1  | 3  | 6  | 8  | 11 | 7  | 9  | 4  | 10 |
| C10335 | 10 | 11 | 7  | 6  | 1  | 9  | 2  | 4  | 5  | 3  | 8  |
| C07771 | 9  | 11 | 10 | 6  | 5  | 4  | 8  | 3  | 1  | 7  | 2  |
| C09372 | 5  | 6  | 10 | 8  | 1  | 11 | 3  | 2  | 4  | 9  | 7  |
| C07471 | 3  | 10 | 5  | 4  | 1  | 2  | 6  | 9  | 8  | 11 | 7  |
| C13556 | 1  | 3  | 11 | 2  | 4  | 10 | 5  | 7  | 9  | 8  | 6  |
| C08317 | 2  | 11 | 3  | 5  | 7  | 10 | 8  | 9  | 6  | 1  | 4  |
| C08380 | 11 | 9  | 3  | 1  | 5  | 2  | 7  | 6  | 10 | 4  | 8  |
| C02108 | 9  | 11 | 1  | 8  | 7  | 3  | 4  | 10 | 2  | 6  | 5  |
| C12297 | 9  | 5  | 8  | 6  | 11 | 2  | 3  | 4  | 1  | 7  | 10 |
| C06856 | 3  | 5  | 10 | 11 | 6  | 2  | 9  | 8  | 1  | 4  | 7  |
| C09227 | 10 | 9  | 5  | 2  | 11 | 4  | 1  | 8  | 3  | 6  | 7  |
| C02604 | 1  | 2  | 8  | 5  | 4  | 6  | 11 | 10 | 9  | 7  | 3  |
| C03736 | 1  | 2  | 4  | 8  | 5  | 6  | 9  | 10 | 7  | 11 | 3  |
| C09904 | 9  | 10 | 3  | 11 | 8  | 5  | 6  | 1  | 2  | 7  | 4  |
| C10041 | 10 | 11 | 5  | 8  | 6  | 4  | 9  | 7  | 3  | 1  | 2  |
| C01327 | 1  | 11 | 5  | 2  | 8  | 6  | 3  | 4  | 10 | 9  | 7  |
| C07080 | 11 | 10 | 3  | 5  | 8  | 9  | 6  | 7  | 1  | 4  | 2  |
| C09445 | 10 | 5  | 9  | 11 | 6  | 8  | 3  | 4  | 1  | 2  | 7  |

|        |    |    |    |    |    |    |    |    |    |    |    |
|--------|----|----|----|----|----|----|----|----|----|----|----|
| C13698 | 1  | 5  | 2  | 11 | 6  | 10 | 3  | 8  | 9  | 4  | 7  |
| C07826 | 2  | 3  | 7  | 4  | 9  | 1  | 11 | 5  | 6  | 10 | 8  |
| C04629 | 2  | 5  | 8  | 1  | 6  | 10 | 11 | 3  | 7  | 9  | 4  |
| C06971 | 5  | 11 | 1  | 9  | 8  | 10 | 4  | 2  | 6  | 3  | 7  |
| C09352 | 10 | 7  | 2  | 5  | 8  | 3  | 9  | 1  | 4  | 11 | 6  |
| C07053 | 10 | 5  | 2  | 7  | 9  | 1  | 3  | 6  | 4  | 8  | 11 |
| C02499 | 11 | 2  | 5  | 8  | 10 | 6  | 9  | 4  | 3  | 1  | 7  |
| C11080 | 2  | 9  | 8  | 10 | 5  | 3  | 1  | 7  | 11 | 4  | 6  |
| C13199 | 2  | 1  | 5  | 4  | 8  | 6  | 7  | 10 | 3  | 11 | 9  |
| C13422 | 10 | 3  | 6  | 2  | 8  | 5  | 9  | 1  | 11 | 7  | 4  |
| C07603 | 10 | 6  | 8  | 9  | 2  | 7  | 3  | 5  | 4  | 11 | 1  |
| C08239 | 1  | 2  | 10 | 5  | 8  | 9  | 6  | 11 | 3  | 7  | 4  |
| C09405 | 1  | 3  | 5  | 9  | 8  | 4  | 11 | 2  | 10 | 6  | 7  |
| C06415 | 11 | 1  | 3  | 5  | 4  | 2  | 10 | 9  | 7  | 6  | 8  |
| C03140 | 6  | 5  | 10 | 2  | 1  | 4  | 11 | 3  | 7  | 9  | 8  |
| C09765 | 9  | 10 | 1  | 8  | 11 | 4  | 2  | 3  | 6  | 5  | 7  |
| C04843 | 3  | 11 | 6  | 9  | 2  | 5  | 4  | 1  | 10 | 7  | 8  |
| C01531 | 3  | 11 | 10 | 5  | 8  | 9  | 1  | 4  | 2  | 7  | 6  |
| C08347 | 1  | 4  | 9  | 2  | 8  | 10 | 5  | 6  | 3  | 11 | 7  |
| C09512 | 3  | 8  | 7  | 6  | 9  | 4  | 11 | 10 | 1  | 5  | 2  |
| C10476 | 5  | 8  | 10 | 11 | 3  | 2  | 6  | 4  | 9  | 1  | 7  |
| C09975 | 10 | 1  | 8  | 5  | 2  | 6  | 9  | 11 | 4  | 3  | 7  |
| C09859 | 9  | 11 | 10 | 1  | 8  | 3  | 6  | 5  | 7  | 2  | 4  |
| C15221 | 11 | 4  | 10 | 1  | 6  | 7  | 3  | 8  | 9  | 2  | 5  |
| C01784 | 1  | 5  | 2  | 8  | 10 | 6  | 11 | 4  | 7  | 9  | 3  |
| C07328 | 1  | 11 | 5  | 9  | 2  | 3  | 10 | 6  | 8  | 7  | 4  |
| C01413 | 1  | 5  | 2  | 8  | 6  | 11 | 10 | 4  | 9  | 3  | 7  |
| C08275 | 5  | 2  | 6  | 10 | 8  | 9  | 4  | 3  | 7  | 1  | 11 |
| C14461 | 11 | 1  | 5  | 2  | 4  | 10 | 8  | 7  | 3  | 6  | 9  |
| C02104 | 9  | 3  | 2  | 8  | 1  | 5  | 6  | 11 | 4  | 7  | 10 |
| C10405 | 11 | 10 | 3  | 8  | 5  | 7  | 6  | 9  | 1  | 2  | 4  |
| C08434 | 9  | 4  | 3  | 5  | 10 | 11 | 6  | 8  | 7  | 1  | 2  |
| C07321 | 10 | 9  | 4  | 11 | 5  | 2  | 6  | 8  | 3  | 7  | 1  |
| C08696 | 9  | 2  | 1  | 10 | 4  | 8  | 3  | 11 | 5  | 7  | 6  |
| C09462 | 10 | 5  | 2  | 8  | 7  | 11 | 3  | 4  | 1  | 9  | 6  |
| C06515 | 2  | 10 | 8  | 6  | 5  | 11 | 9  | 7  | 3  | 4  | 1  |
| C15205 | 11 | 9  | 5  | 4  | 2  | 7  | 6  | 3  | 1  | 10 | 8  |
| C01965 | 8  | 9  | 10 | 5  | 2  | 6  | 4  | 11 | 3  | 1  | 7  |
| C11226 | 11 | 3  | 9  | 10 | 1  | 2  | 7  | 8  | 5  | 6  | 4  |
| C15513 | 11 | 9  | 2  | 8  | 5  | 3  | 1  | 6  | 10 | 7  | 4  |
| C02107 | 1  | 2  | 5  | 8  | 11 | 4  | 3  | 10 | 6  | 9  | 7  |
| C04346 | 6  | 1  | 10 | 9  | 8  | 5  | 2  | 4  | 11 | 3  | 7  |
| C04580 | 1  | 2  | 3  | 10 | 4  | 5  | 8  | 7  | 9  | 11 | 6  |

|        |    |    |    |    |    |    |    |    |    |    |    |
|--------|----|----|----|----|----|----|----|----|----|----|----|
| C10179 | 10 | 11 | 8  | 5  | 3  | 4  | 9  | 6  | 2  | 7  | 1  |
| C10419 | 10 | 11 | 8  | 6  | 1  | 2  | 3  | 7  | 4  | 9  | 5  |
| C00878 | 1  | 8  | 2  | 5  | 6  | 7  | 10 | 3  | 11 | 4  | 9  |
| C06017 | 2  | 6  | 8  | 9  | 10 | 7  | 4  | 11 | 3  | 5  | 1  |
| C09718 | 9  | 8  | 3  | 6  | 5  | 10 | 7  | 4  | 1  | 11 | 2  |
| C13734 | 5  | 6  | 8  | 10 | 2  | 1  | 11 | 4  | 3  | 9  | 7  |
| C09538 | 9  | 8  | 11 | 5  | 10 | 1  | 2  | 3  | 4  | 6  | 7  |
| C02323 | 1  | 11 | 9  | 5  | 4  | 2  | 10 | 8  | 3  | 7  | 6  |
| C01675 | 1  | 9  | 3  | 6  | 10 | 5  | 11 | 2  | 8  | 7  | 4  |
| C11712 | 3  | 7  | 4  | 1  | 8  | 2  | 11 | 10 | 5  | 6  | 9  |
| C12557 | 10 | 9  | 6  | 5  | 2  | 1  | 3  | 7  | 4  | 11 | 8  |
| C10199 | 1  | 10 | 4  | 9  | 2  | 3  | 8  | 7  | 6  | 11 | 5  |
| C13727 | 1  | 4  | 3  | 8  | 10 | 9  | 6  | 2  | 5  | 7  | 11 |
| C07368 | 5  | 10 | 3  | 1  | 11 | 2  | 4  | 6  | 8  | 9  | 7  |
| C10998 | 11 | 2  | 8  | 6  | 3  | 5  | 10 | 1  | 4  | 9  | 7  |
| C12967 | 8  | 3  | 4  | 1  | 10 | 6  | 9  | 11 | 5  | 2  | 7  |
| C12336 | 11 | 10 | 1  | 4  | 7  | 2  | 5  | 6  | 3  | 9  | 8  |
| C04622 | 3  | 11 | 8  | 10 | 9  | 5  | 2  | 6  | 4  | 1  | 7  |
| C09064 | 1  | 2  | 6  | 4  | 5  | 11 | 9  | 3  | 10 | 8  | 7  |
| C13932 | 1  | 6  | 10 | 5  | 2  | 8  | 11 | 4  | 9  | 7  | 3  |
| C11278 | 2  | 6  | 8  | 11 | 5  | 4  | 7  | 3  | 1  | 10 | 9  |
| C03916 | 11 | 3  | 7  | 8  | 5  | 1  | 9  | 4  | 6  | 2  | 10 |
| C07529 | 10 | 5  | 11 | 1  | 9  | 2  | 4  | 7  | 6  | 3  | 8  |
| C02777 | 5  | 8  | 10 | 2  | 6  | 1  | 4  | 11 | 3  | 9  | 7  |
| C10458 | 5  | 10 | 8  | 6  | 1  | 11 | 2  | 3  | 9  | 4  | 7  |
| C13761 | 3  | 5  | 2  | 1  | 7  | 9  | 11 | 8  | 6  | 4  | 10 |
| C11346 | 1  | 10 | 11 | 2  | 4  | 3  | 6  | 5  | 7  | 8  | 9  |
| C08422 | 10 | 5  | 3  | 2  | 11 | 1  | 7  | 8  | 9  | 4  | 6  |
| C15614 | 2  | 8  | 3  | 5  | 1  | 10 | 7  | 6  | 11 | 4  | 9  |
| C04674 | 1  | 2  | 8  | 4  | 9  | 3  | 11 | 6  | 7  | 10 | 5  |
| C14672 | 11 | 5  | 6  | 10 | 1  | 3  | 2  | 9  | 4  | 8  | 7  |
| C07225 | 9  | 10 | 8  | 6  | 5  | 1  | 11 | 2  | 4  | 3  | 7  |
| C01383 | 1  | 2  | 8  | 5  | 3  | 7  | 9  | 10 | 6  | 11 | 4  |
| C07955 | 3  | 9  | 1  | 8  | 11 | 5  | 4  | 7  | 6  | 2  | 10 |
| C13763 | 10 | 2  | 3  | 1  | 11 | 6  | 7  | 8  | 5  | 9  | 4  |
| C07541 | 5  | 10 | 9  | 11 | 6  | 8  | 3  | 1  | 7  | 2  | 4  |
| C08913 | 3  | 4  | 9  | 1  | 5  | 10 | 11 | 2  | 6  | 8  | 7  |
| C14560 | 11 | 6  | 8  | 2  | 3  | 5  | 7  | 10 | 1  | 4  | 9  |
| C09476 | 2  | 3  | 10 | 6  | 1  | 7  | 9  | 4  | 8  | 5  | 11 |
| C13297 | 10 | 9  | 6  | 3  | 8  | 1  | 7  | 2  | 11 | 5  | 4  |
| C02130 | 1  | 3  | 5  | 11 | 6  | 8  | 2  | 9  | 10 | 7  | 4  |
| C09097 | 9  | 3  | 4  | 8  | 1  | 11 | 10 | 5  | 6  | 7  | 2  |
| C14703 | 3  | 11 | 6  | 4  | 9  | 1  | 5  | 7  | 10 | 8  | 2  |



|        |    |    |    |    |    |    |    |    |    |    |    |
|--------|----|----|----|----|----|----|----|----|----|----|----|
| C04527 | 5  | 9  | 10 | 3  | 8  | 4  | 11 | 6  | 2  | 7  | 1  |
| C11172 | 11 | 2  | 8  | 6  | 5  | 3  | 1  | 10 | 7  | 4  | 9  |
| C02351 | 11 | 5  | 10 | 8  | 2  | 1  | 6  | 9  | 4  | 3  | 7  |
| C08618 | 10 | 3  | 9  | 11 | 2  | 5  | 8  | 7  | 1  | 6  | 4  |
| C11777 | 5  | 10 | 11 | 6  | 7  | 9  | 4  | 1  | 3  | 2  | 8  |
| C11306 | 3  | 9  | 1  | 4  | 5  | 10 | 8  | 6  | 11 | 7  | 2  |
| C06710 | 2  | 1  | 5  | 8  | 6  | 4  | 10 | 11 | 9  | 7  | 3  |
| C08833 | 3  | 6  | 1  | 2  | 10 | 7  | 4  | 11 | 9  | 8  | 5  |
| C07482 | 3  | 5  | 6  | 8  | 4  | 2  | 7  | 11 | 1  | 10 | 9  |
| C13534 | 10 | 11 | 2  | 6  | 3  | 9  | 4  | 8  | 7  | 1  | 5  |
| C12329 | 10 | 9  | 5  | 6  | 8  | 7  | 2  | 3  | 1  | 11 | 4  |
| C11203 | 9  | 11 | 1  | 10 | 3  | 2  | 8  | 6  | 7  | 5  | 4  |
| C07561 | 11 | 1  | 6  | 5  | 8  | 10 | 2  | 3  | 4  | 7  | 9  |
| C04299 | 1  | 2  | 10 | 8  | 7  | 3  | 6  | 5  | 11 | 4  | 9  |
| C10862 | 10 | 1  | 8  | 9  | 2  | 11 | 3  | 6  | 4  | 5  | 7  |
| C09179 | 10 | 2  | 8  | 6  | 1  | 5  | 9  | 3  | 4  | 11 | 7  |
| C01757 | 2  | 11 | 5  | 9  | 8  | 1  | 7  | 6  | 10 | 3  | 4  |
| C09464 | 10 | 1  | 9  | 2  | 5  | 11 | 3  | 7  | 4  | 6  | 8  |
| C11231 | 9  | 11 | 3  | 10 | 8  | 4  | 2  | 7  | 5  | 1  | 6  |
| C04058 | 4  | 2  | 9  | 1  | 7  | 6  | 3  | 5  | 10 | 8  | 11 |
| C11849 | 5  | 7  | 6  | 1  | 8  | 3  | 11 | 4  | 2  | 9  | 10 |
| C07520 | 5  | 10 | 2  | 11 | 4  | 3  | 6  | 1  | 8  | 9  | 7  |
| C05650 | 5  | 8  | 10 | 11 | 9  | 6  | 2  | 7  | 3  | 4  | 1  |
| C07452 | 11 | 10 | 5  | 4  | 2  | 6  | 9  | 1  | 3  | 7  | 8  |
| C10486 | 10 | 9  | 2  | 8  | 5  | 3  | 11 | 4  | 1  | 6  | 7  |
| C07714 | 10 | 2  | 3  | 5  | 4  | 6  | 8  | 7  | 9  | 11 | 1  |
| C09696 | 3  | 6  | 1  | 10 | 7  | 2  | 11 | 4  | 8  | 5  | 9  |
| C11288 | 3  | 1  | 8  | 10 | 4  | 9  | 6  | 2  | 5  | 11 | 7  |
| C10300 | 10 | 11 | 5  | 8  | 9  | 1  | 7  | 4  | 3  | 6  | 2  |
| C11718 | 1  | 8  | 5  | 11 | 2  | 9  | 10 | 4  | 6  | 3  | 7  |
| C13802 | 3  | 1  | 7  | 10 | 8  | 2  | 11 | 4  | 6  | 5  | 9  |
| C04110 | 2  | 8  | 9  | 7  | 5  | 3  | 4  | 10 | 6  | 11 | 1  |
| C11315 | 3  | 11 | 6  | 4  | 9  | 2  | 1  | 8  | 7  | 10 | 5  |
| C13085 | 1  | 2  | 4  | 7  | 5  | 10 | 8  | 11 | 9  | 3  | 6  |
| C15554 | 1  | 10 | 3  | 4  | 5  | 2  | 11 | 7  | 9  | 6  | 8  |
| C15235 | 8  | 11 | 4  | 7  | 9  | 6  | 10 | 3  | 1  | 5  | 2  |
| C10181 | 10 | 1  | 11 | 6  | 2  | 5  | 9  | 8  | 4  | 7  | 3  |
| C02395 | 11 | 9  | 10 | 3  | 2  | 6  | 8  | 4  | 5  | 7  | 1  |
| C15686 | 2  | 5  | 6  | 4  | 1  | 9  | 3  | 11 | 10 | 8  | 7  |
| C12445 | 9  | 7  | 4  | 6  | 3  | 10 | 11 | 8  | 2  | 5  | 1  |
| C14194 | 11 | 1  | 2  | 3  | 6  | 4  | 8  | 9  | 5  | 10 | 7  |
| C08635 | 9  | 4  | 7  | 10 | 6  | 1  | 3  | 2  | 8  | 5  | 11 |
| C11715 | 1  | 2  | 9  | 8  | 11 | 10 | 5  | 3  | 4  | 7  | 6  |

|        |    |    |    |    |    |    |    |    |    |    |    |
|--------|----|----|----|----|----|----|----|----|----|----|----|
| C15336 | 3  | 11 | 1  | 2  | 8  | 4  | 7  | 6  | 5  | 10 | 9  |
| C09127 | 8  | 10 | 2  | 3  | 4  | 11 | 5  | 6  | 1  | 7  | 9  |
| C13650 | 10 | 11 | 5  | 8  | 9  | 3  | 2  | 4  | 7  | 1  | 6  |
| C04543 | 6  | 11 | 8  | 5  | 2  | 10 | 9  | 4  | 3  | 1  | 7  |
| C03224 | 5  | 11 | 9  | 8  | 6  | 10 | 4  | 1  | 2  | 3  | 7  |
| C01624 | 3  | 2  | 6  | 1  | 10 | 11 | 7  | 8  | 5  | 4  | 9  |
| C07706 | 1  | 3  | 5  | 2  | 4  | 8  | 6  | 7  | 9  | 11 | 10 |
| C03678 | 5  | 1  | 6  | 4  | 11 | 8  | 2  | 10 | 3  | 7  | 9  |
| C10984 | 9  | 4  | 11 | 2  | 8  | 10 | 5  | 6  | 7  | 3  | 1  |
| C08754 | 5  | 10 | 11 | 1  | 3  | 4  | 2  | 9  | 8  | 6  | 7  |
| C15693 | 5  | 10 | 6  | 7  | 1  | 9  | 2  | 11 | 3  | 4  | 8  |
| C13968 | 10 | 5  | 9  | 6  | 1  | 3  | 11 | 8  | 4  | 7  | 2  |
| C15201 | 3  | 1  | 8  | 6  | 4  | 5  | 9  | 10 | 7  | 11 | 2  |
| C10892 | 3  | 5  | 11 | 8  | 10 | 6  | 1  | 2  | 9  | 4  | 7  |
| C08018 | 10 | 11 | 8  | 2  | 7  | 6  | 9  | 3  | 4  | 1  | 5  |
| C07538 | 11 | 5  | 10 | 3  | 8  | 2  | 9  | 1  | 6  | 4  | 7  |
| C14596 | 3  | 11 | 10 | 5  | 6  | 4  | 7  | 1  | 8  | 2  | 9  |
| C11378 | 8  | 9  | 2  | 5  | 1  | 6  | 11 | 3  | 4  | 10 | 7  |
| C09649 | 9  | 11 | 5  | 10 | 1  | 4  | 7  | 2  | 3  | 6  | 8  |
| C13269 | 8  | 9  | 3  | 4  | 2  | 5  | 6  | 11 | 7  | 10 | 1  |
| C15668 | 5  | 6  | 8  | 2  | 10 | 1  | 3  | 11 | 9  | 4  | 7  |
| C10469 | 9  | 10 | 5  | 11 | 2  | 6  | 8  | 1  | 7  | 3  | 4  |
| C14425 | 11 | 2  | 10 | 6  | 9  | 3  | 7  | 5  | 8  | 4  | 1  |
| C08961 | 11 | 2  | 1  | 9  | 4  | 6  | 3  | 5  | 8  | 10 | 7  |
| C11505 | 11 | 2  | 1  | 8  | 5  | 3  | 6  | 4  | 10 | 7  | 9  |
| C10580 | 10 | 4  | 9  | 7  | 8  | 2  | 6  | 3  | 11 | 1  | 5  |
| C14388 | 11 | 9  | 10 | 2  | 3  | 1  | 7  | 5  | 8  | 6  | 4  |
| C07568 | 11 | 10 | 5  | 8  | 7  | 3  | 4  | 1  | 6  | 9  | 2  |
| C07937 | 5  | 6  | 11 | 1  | 10 | 2  | 8  | 9  | 3  | 7  | 4  |
| C15194 | 3  | 10 | 5  | 2  | 1  | 7  | 11 | 6  | 8  | 4  | 9  |
| C13630 | 11 | 10 | 3  | 8  | 9  | 2  | 1  | 6  | 4  | 7  | 5  |
| C07905 | 4  | 11 | 1  | 8  | 6  | 9  | 7  | 10 | 2  | 5  | 3  |
| C09379 | 8  | 6  | 1  | 4  | 11 | 2  | 10 | 7  | 3  | 5  | 9  |
| C13718 | 11 | 10 | 1  | 6  | 9  | 2  | 5  | 3  | 4  | 8  | 7  |
| C16433 | 5  | 1  | 2  | 6  | 8  | 4  | 10 | 11 | 3  | 9  | 7  |
| C14374 | 3  | 4  | 6  | 10 | 7  | 8  | 11 | 9  | 5  | 2  | 1  |
| C09688 | 9  | 10 | 6  | 2  | 5  | 11 | 3  | 8  | 7  | 1  | 4  |
| C07206 | 3  | 5  | 10 | 2  | 7  | 6  | 1  | 4  | 11 | 8  | 9  |
| C10344 | 10 | 2  | 8  | 1  | 7  | 11 | 3  | 6  | 4  | 9  | 5  |
| C01554 | 3  | 8  | 2  | 9  | 4  | 10 | 5  | 1  | 11 | 7  | 6  |
| C15680 | 9  | 5  | 1  | 10 | 4  | 3  | 2  | 7  | 8  | 6  | 11 |
| C10445 | 10 | 5  | 8  | 11 | 2  | 4  | 9  | 7  | 6  | 3  | 1  |
| C10224 | 2  | 8  | 6  | 11 | 10 | 4  | 5  | 9  | 3  | 1  | 7  |

|        |    |    |    |    |    |    |    |    |    |    |    |
|--------|----|----|----|----|----|----|----|----|----|----|----|
| C10785 | 11 | 5  | 6  | 2  | 9  | 10 | 1  | 3  | 7  | 8  | 4  |
| C08082 | 11 | 5  | 9  | 3  | 6  | 1  | 8  | 2  | 7  | 4  | 10 |
| C05000 | 1  | 2  | 9  | 3  | 5  | 8  | 10 | 4  | 6  | 11 | 7  |
| C07611 | 10 | 2  | 1  | 3  | 9  | 6  | 5  | 11 | 8  | 4  | 7  |
| C14745 | 10 | 5  | 11 | 7  | 4  | 6  | 1  | 8  | 3  | 2  | 9  |
| C11101 | 1  | 5  | 2  | 11 | 10 | 8  | 6  | 3  | 9  | 4  | 7  |
| C08370 | 11 | 10 | 5  | 8  | 6  | 9  | 3  | 1  | 2  | 4  | 7  |
| C07662 | 11 | 9  | 10 | 6  | 8  | 3  | 1  | 2  | 4  | 7  | 5  |
| C06470 | 1  | 5  | 6  | 2  | 7  | 3  | 8  | 11 | 10 | 9  | 4  |
| C12891 | 9  | 7  | 8  | 6  | 10 | 1  | 3  | 2  | 4  | 11 | 5  |
| C10643 | 10 | 7  | 5  | 3  | 11 | 9  | 6  | 8  | 2  | 1  | 4  |
| C08869 | 9  | 1  | 2  | 6  | 7  | 3  | 4  | 10 | 11 | 5  | 8  |
| C07188 | 10 | 3  | 1  | 9  | 5  | 11 | 2  | 4  | 8  | 6  | 7  |
| C13652 | 1  | 10 | 9  | 8  | 5  | 6  | 3  | 2  | 4  | 11 | 7  |
| C15637 | 3  | 11 | 9  | 5  | 4  | 7  | 6  | 10 | 1  | 8  | 2  |
| C02806 | 10 | 5  | 8  | 11 | 9  | 7  | 1  | 2  | 3  | 4  | 6  |
| C11506 | 11 | 2  | 8  | 1  | 3  | 5  | 4  | 6  | 10 | 7  | 9  |
| C07239 | 5  | 10 | 3  | 8  | 7  | 9  | 4  | 2  | 11 | 6  | 1  |
| C08687 | 5  | 9  | 1  | 4  | 2  | 8  | 7  | 3  | 11 | 6  | 10 |
| C08068 | 5  | 11 | 3  | 10 | 8  | 2  | 1  | 4  | 9  | 6  | 7  |
| C05153 | 2  | 8  | 11 | 5  | 9  | 10 | 3  | 1  | 7  | 6  | 4  |
| C07036 | 10 | 5  | 2  | 4  | 3  | 6  | 8  | 11 | 9  | 1  | 7  |
| C10296 | 3  | 9  | 8  | 1  | 11 | 6  | 2  | 10 | 7  | 4  | 5  |
| C04489 | 2  | 5  | 9  | 6  | 7  | 8  | 1  | 4  | 10 | 11 | 3  |
| C07435 | 5  | 10 | 3  | 4  | 11 | 8  | 2  | 9  | 1  | 7  | 6  |
| C07625 | 1  | 10 | 11 | 9  | 8  | 5  | 3  | 4  | 2  | 6  | 7  |
| C02636 | 5  | 2  | 8  | 4  | 7  | 11 | 3  | 10 | 6  | 9  | 1  |
| C06352 | 1  | 10 | 2  | 5  | 8  | 6  | 9  | 3  | 11 | 4  | 7  |
| C02360 | 2  | 8  | 5  | 4  | 11 | 6  | 1  | 7  | 3  | 9  | 10 |
| C07362 | 11 | 1  | 4  | 9  | 2  | 3  | 6  | 8  | 10 | 7  | 5  |
| C11696 | 10 | 5  | 4  | 1  | 9  | 2  | 3  | 7  | 11 | 8  | 6  |
| C08093 | 6  | 4  | 1  | 9  | 5  | 11 | 3  | 2  | 8  | 10 | 7  |
| C10056 | 2  | 8  | 6  | 10 | 5  | 4  | 9  | 3  | 11 | 1  | 7  |
| C14283 | 11 | 5  | 9  | 8  | 10 | 3  | 6  | 7  | 1  | 2  | 4  |
| C07369 | 3  | 11 | 10 | 4  | 5  | 9  | 2  | 8  | 1  | 6  | 7  |
| C09596 | 10 | 11 | 8  | 1  | 7  | 5  | 6  | 3  | 4  | 9  | 2  |
| C01792 | 11 | 3  | 6  | 2  | 10 | 8  | 5  | 9  | 1  | 7  | 4  |
| C11066 | 11 | 5  | 6  | 4  | 10 | 7  | 3  | 8  | 1  | 2  | 9  |
| C09154 | 11 | 10 | 9  | 2  | 5  | 1  | 4  | 7  | 6  | 8  | 3  |
| C03109 | 1  | 2  | 8  | 5  | 9  | 10 | 7  | 6  | 4  | 3  | 11 |
| C06913 | 5  | 10 | 9  | 1  | 11 | 2  | 3  | 7  | 8  | 4  | 6  |
| C10709 | 11 | 8  | 4  | 9  | 5  | 10 | 3  | 7  | 6  | 1  | 2  |
| C08262 | 5  | 1  | 9  | 11 | 10 | 7  | 6  | 3  | 8  | 2  | 4  |

|        |    |    |    |    |    |    |    |    |    |    |    |
|--------|----|----|----|----|----|----|----|----|----|----|----|
| C13682 | 10 | 5  | 6  | 8  | 1  | 2  | 3  | 9  | 4  | 11 | 7  |
| C04613 | 6  | 8  | 1  | 5  | 10 | 2  | 4  | 9  | 3  | 11 | 7  |
| C08069 | 5  | 11 | 3  | 10 | 8  | 2  | 1  | 4  | 9  | 6  | 7  |
| C10306 | 9  | 5  | 11 | 4  | 6  | 3  | 8  | 2  | 7  | 1  | 10 |
| C06814 | 1  | 4  | 2  | 8  | 5  | 9  | 10 | 6  | 7  | 3  | 11 |
| C09745 | 9  | 10 | 5  | 1  | 11 | 6  | 3  | 2  | 8  | 7  | 4  |
| C10837 | 1  | 4  | 2  | 7  | 11 | 5  | 10 | 9  | 8  | 6  | 3  |
| C11825 | 3  | 6  | 2  | 5  | 1  | 9  | 8  | 10 | 4  | 11 | 7  |
| C08894 | 3  | 2  | 4  | 8  | 11 | 1  | 9  | 10 | 6  | 5  | 7  |
| C06550 | 2  | 6  | 9  | 1  | 7  | 8  | 4  | 11 | 3  | 10 | 5  |
| C08982 | 1  | 2  | 10 | 6  | 9  | 3  | 11 | 5  | 4  | 7  | 8  |
| C08475 | 5  | 1  | 6  | 8  | 10 | 3  | 7  | 4  | 9  | 2  | 11 |
| C10646 | 10 | 11 | 9  | 5  | 7  | 4  | 8  | 3  | 2  | 6  | 1  |
| C08621 | 3  | 2  | 8  | 5  | 10 | 1  | 6  | 9  | 11 | 4  | 7  |
| C04617 | 1  | 2  | 5  | 8  | 6  | 11 | 3  | 4  | 9  | 10 | 7  |
| C10143 | 1  | 10 | 2  | 4  | 8  | 5  | 7  | 3  | 11 | 6  | 9  |
| C10552 | 10 | 3  | 1  | 9  | 7  | 6  | 11 | 8  | 5  | 2  | 4  |
| C07250 | 10 | 9  | 6  | 4  | 5  | 1  | 7  | 8  | 3  | 2  | 11 |
| C11587 | 3  | 10 | 5  | 1  | 6  | 2  | 4  | 9  | 8  | 11 | 7  |
| C07498 | 11 | 1  | 10 | 9  | 2  | 5  | 8  | 3  | 6  | 4  | 7  |
| C11008 | 11 | 2  | 8  | 10 | 3  | 1  | 4  | 9  | 6  | 7  | 5  |
| C10190 | 10 | 11 | 3  | 5  | 4  | 8  | 1  | 7  | 6  | 9  | 2  |
| C10110 | 10 | 1  | 11 | 2  | 5  | 9  | 6  | 3  | 8  | 4  | 7  |
| C07995 | 11 | 1  | 8  | 5  | 2  | 3  | 9  | 10 | 6  | 4  | 7  |
| C08921 | 1  | 4  | 10 | 5  | 3  | 2  | 11 | 8  | 6  | 9  | 7  |
| C00962 | 1  | 2  | 10 | 5  | 6  | 8  | 3  | 4  | 11 | 9  | 7  |
| C02367 | 1  | 6  | 11 | 5  | 2  | 4  | 7  | 3  | 10 | 8  | 9  |
| C07468 | 1  | 3  | 2  | 5  | 11 | 10 | 9  | 6  | 7  | 8  | 4  |
| C15600 | 5  | 8  | 10 | 11 | 9  | 6  | 2  | 1  | 3  | 4  | 7  |
| C04703 | 1  | 3  | 4  | 9  | 10 | 6  | 11 | 5  | 2  | 7  | 8  |
| C14185 | 11 | 8  | 9  | 10 | 1  | 5  | 6  | 7  | 2  | 3  | 4  |
| C06536 | 5  | 10 | 6  | 2  | 8  | 1  | 4  | 3  | 7  | 11 | 9  |
| C09919 | 10 | 11 | 1  | 5  | 8  | 2  | 3  | 4  | 6  | 9  | 7  |
| C08716 | 10 | 1  | 11 | 5  | 2  | 9  | 8  | 6  | 3  | 4  | 7  |
| C11232 | 2  | 8  | 11 | 1  | 9  | 5  | 4  | 10 | 6  | 7  | 3  |
| C11262 | 11 | 4  | 5  | 9  | 10 | 8  | 1  | 2  | 6  | 7  | 3  |
| C11394 | 9  | 11 | 8  | 6  | 1  | 5  | 3  | 7  | 2  | 4  | 10 |
| C10135 | 10 | 5  | 11 | 9  | 2  | 3  | 7  | 6  | 8  | 1  | 4  |
| C07055 | 10 | 5  | 6  | 2  | 7  | 8  | 3  | 1  | 11 | 9  | 4  |
| C09622 | 9  | 10 | 3  | 1  | 2  | 6  | 8  | 11 | 7  | 5  | 4  |
| C12100 | 5  | 6  | 2  | 1  | 3  | 9  | 11 | 4  | 7  | 8  | 10 |
| C15505 | 11 | 2  | 8  | 6  | 5  | 7  | 4  | 1  | 9  | 10 | 3  |
| C15701 | 4  | 10 | 6  | 8  | 5  | 2  | 1  | 3  | 11 | 9  | 7  |

|        |    |    |    |    |    |    |    |    |    |    |    |
|--------|----|----|----|----|----|----|----|----|----|----|----|
| C14130 | 11 | 10 | 5  | 1  | 2  | 9  | 4  | 3  | 6  | 7  | 8  |
| C13708 | 10 | 4  | 3  | 5  | 2  | 1  | 11 | 8  | 6  | 9  | 7  |
| C02022 | 1  | 2  | 8  | 6  | 5  | 9  | 3  | 7  | 11 | 10 | 4  |
| C14390 | 11 | 9  | 8  | 1  | 2  | 5  | 3  | 6  | 10 | 7  | 4  |
| C04923 | 1  | 7  | 9  | 10 | 4  | 6  | 3  | 8  | 5  | 2  | 11 |
| C08107 | 4  | 9  | 2  | 10 | 5  | 1  | 11 | 6  | 8  | 3  | 7  |
| C08898 | 3  | 9  | 10 | 6  | 1  | 2  | 8  | 7  | 5  | 4  | 11 |
| C12564 | 11 | 10 | 5  | 8  | 3  | 9  | 4  | 7  | 1  | 2  | 6  |
| C05010 | 1  | 5  | 2  | 11 | 7  | 9  | 3  | 4  | 10 | 8  | 6  |
| C15703 | 8  | 5  | 3  | 6  | 11 | 1  | 4  | 10 | 9  | 2  | 7  |
| C04599 | 5  | 10 | 6  | 11 | 8  | 2  | 1  | 9  | 4  | 7  | 3  |
| C10816 | 2  | 4  | 1  | 10 | 9  | 3  | 8  | 5  | 7  | 11 | 6  |
| C08527 | 10 | 3  | 9  | 1  | 5  | 11 | 6  | 8  | 7  | 2  | 4  |
| C09082 | 10 | 5  | 2  | 1  | 8  | 9  | 3  | 11 | 7  | 4  | 6  |
| C09740 | 9  | 10 | 4  | 1  | 7  | 8  | 2  | 11 | 3  | 5  | 6  |
| C08794 | 1  | 9  | 10 | 8  | 11 | 3  | 7  | 6  | 5  | 4  | 2  |
| C11009 | 11 | 10 | 1  | 4  | 2  | 3  | 6  | 5  | 7  | 9  | 8  |
| C14695 | 2  | 8  | 1  | 5  | 10 | 11 | 4  | 9  | 6  | 3  | 7  |
| C01387 | 1  | 3  | 11 | 2  | 8  | 5  | 9  | 6  | 4  | 10 | 7  |
| C06954 | 5  | 10 | 7  | 8  | 3  | 9  | 2  | 6  | 1  | 4  | 11 |
| C06255 | 5  | 1  | 8  | 2  | 10 | 6  | 11 | 9  | 3  | 4  | 7  |
| C10261 | 5  | 10 | 3  | 1  | 6  | 9  | 7  | 11 | 2  | 8  | 4  |
| C12296 | 9  | 11 | 1  | 5  | 6  | 2  | 10 | 3  | 7  | 8  | 4  |
| C10537 | 10 | 8  | 9  | 5  | 6  | 11 | 1  | 3  | 4  | 2  | 7  |
| C07506 | 1  | 10 | 4  | 5  | 7  | 2  | 6  | 8  | 3  | 9  | 11 |
| C04471 | 1  | 2  | 6  | 8  | 9  | 10 | 11 | 5  | 3  | 7  | 4  |
| C06475 | 3  | 5  | 4  | 2  | 1  | 6  | 10 | 11 | 8  | 9  | 7  |
| C08439 | 6  | 9  | 11 | 5  | 8  | 4  | 10 | 2  | 1  | 3  | 7  |
| C06632 | 9  | 1  | 6  | 5  | 2  | 8  | 4  | 3  | 11 | 7  | 10 |
| C06958 | 10 | 5  | 2  | 3  | 1  | 4  | 8  | 11 | 9  | 6  | 7  |
| C02484 | 9  | 11 | 5  | 1  | 6  | 8  | 3  | 10 | 7  | 4  | 2  |
| C11195 | 11 | 8  | 9  | 10 | 4  | 2  | 3  | 6  | 1  | 7  | 5  |
| C10641 | 8  | 2  | 6  | 11 | 5  | 10 | 7  | 1  | 3  | 4  | 9  |
| C06527 | 10 | 1  | 2  | 9  | 8  | 5  | 11 | 6  | 4  | 3  | 7  |
| C03986 | 5  | 11 | 8  | 9  | 10 | 3  | 1  | 2  | 4  | 7  | 6  |
| C09119 | 2  | 4  | 11 | 5  | 7  | 10 | 1  | 3  | 9  | 6  | 8  |
| C10468 | 10 | 5  | 1  | 8  | 3  | 11 | 6  | 4  | 2  | 7  | 9  |
| C02455 | 11 | 5  | 10 | 1  | 6  | 4  | 2  | 3  | 9  | 8  | 7  |
| C10023 | 10 | 3  | 8  | 5  | 11 | 6  | 2  | 9  | 4  | 1  | 7  |
| C10886 | 10 | 9  | 1  | 4  | 11 | 8  | 2  | 6  | 5  | 3  | 7  |
| C11768 | 5  | 3  | 10 | 11 | 8  | 2  | 6  | 7  | 9  | 1  | 4  |
| C02209 | 1  | 2  | 10 | 5  | 6  | 8  | 3  | 4  | 11 | 9  | 7  |
| C14395 | 11 | 10 | 9  | 1  | 5  | 7  | 2  | 3  | 6  | 8  | 4  |

|        |    |    |    |    |    |    |    |    |    |    |    |
|--------|----|----|----|----|----|----|----|----|----|----|----|
| C03173 | 5  | 2  | 10 | 8  | 7  | 11 | 4  | 1  | 3  | 9  | 6  |
| C10993 | 5  | 6  | 2  | 8  | 10 | 9  | 11 | 4  | 3  | 1  | 7  |
| C11791 | 11 | 10 | 5  | 4  | 2  | 7  | 8  | 3  | 9  | 1  | 6  |
| C08026 | 10 | 11 | 2  | 7  | 3  | 6  | 9  | 8  | 4  | 5  | 1  |
| C12269 | 5  | 6  | 10 | 8  | 1  | 2  | 3  | 11 | 4  | 9  | 7  |
| C03235 | 11 | 5  | 8  | 9  | 2  | 3  | 1  | 7  | 10 | 4  | 6  |
| C10889 | 10 | 11 | 5  | 1  | 2  | 8  | 4  | 6  | 3  | 9  | 7  |
| C05132 | 5  | 1  | 7  | 4  | 3  | 11 | 8  | 9  | 6  | 10 | 2  |
| C11077 | 11 | 2  | 8  | 6  | 4  | 9  | 3  | 1  | 5  | 10 | 7  |
| C02160 | 1  | 10 | 6  | 4  | 7  | 5  | 3  | 9  | 2  | 11 | 8  |
| C07910 | 8  | 11 | 10 | 9  | 5  | 3  | 4  | 2  | 7  | 1  | 6  |
| C02028 | 1  | 5  | 2  | 11 | 6  | 8  | 10 | 3  | 4  | 9  | 7  |
| C12039 | 8  | 9  | 11 | 10 | 1  | 3  | 2  | 5  | 6  | 7  | 4  |
| C07370 | 3  | 11 | 5  | 10 | 9  | 8  | 4  | 2  | 1  | 6  | 7  |
| C09706 | 5  | 3  | 1  | 9  | 10 | 4  | 11 | 2  | 7  | 6  | 8  |
| C15025 | 5  | 3  | 8  | 1  | 2  | 6  | 11 | 9  | 4  | 10 | 7  |
| C13072 | 1  | 3  | 11 | 10 | 5  | 9  | 6  | 7  | 8  | 4  | 2  |
| C10620 | 10 | 11 | 6  | 5  | 8  | 3  | 9  | 4  | 7  | 1  | 2  |
| C09161 | 8  | 1  | 10 | 5  | 2  | 11 | 9  | 6  | 3  | 7  | 4  |
| C10292 | 10 | 9  | 8  | 11 | 5  | 3  | 7  | 4  | 2  | 6  | 1  |
| C13694 | 5  | 6  | 1  | 8  | 2  | 10 | 4  | 11 | 7  | 3  | 9  |
| C13588 | 3  | 4  | 5  | 1  | 11 | 9  | 2  | 7  | 10 | 8  | 6  |
| C13820 | 4  | 2  | 5  | 10 | 3  | 6  | 9  | 11 | 8  | 1  | 7  |
| C13730 | 6  | 8  | 5  | 1  | 10 | 2  | 7  | 4  | 9  | 3  | 11 |
| C06915 | 10 | 9  | 11 | 5  | 3  | 4  | 6  | 2  | 7  | 1  | 8  |
| C07564 | 10 | 5  | 6  | 1  | 9  | 7  | 3  | 4  | 8  | 11 | 2  |
| C15504 | 2  | 6  | 8  | 9  | 5  | 10 | 7  | 3  | 1  | 11 | 4  |
| C09432 | 4  | 11 | 10 | 6  | 2  | 7  | 3  | 1  | 5  | 8  | 9  |
| C10650 | 11 | 5  | 10 | 9  | 3  | 7  | 4  | 2  | 1  | 6  | 8  |
| C14021 | 10 | 9  | 5  | 6  | 4  | 2  | 7  | 3  | 11 | 8  | 1  |
| C05330 | 5  | 2  | 8  | 6  | 1  | 9  | 4  | 3  | 10 | 11 | 7  |
| C04367 | 2  | 8  | 4  | 5  | 11 | 10 | 9  | 6  | 3  | 7  | 1  |
| C07230 | 5  | 10 | 11 | 6  | 8  | 7  | 3  | 9  | 4  | 2  | 1  |
| C02804 | 1  | 5  | 9  | 6  | 3  | 2  | 11 | 7  | 10 | 4  | 8  |
| C08576 | 10 | 4  | 2  | 6  | 7  | 3  | 11 | 1  | 9  | 5  | 8  |
| C07752 | 3  | 9  | 2  | 5  | 4  | 7  | 8  | 11 | 1  | 10 | 6  |
| C15762 | 10 | 8  | 1  | 7  | 9  | 6  | 3  | 5  | 4  | 11 | 2  |
| C09083 | 10 | 8  | 2  | 5  | 3  | 9  | 7  | 11 | 6  | 4  | 1  |
| C11366 | 11 | 8  | 6  | 10 | 9  | 5  | 1  | 3  | 4  | 7  | 2  |
| C07528 | 10 | 5  | 2  | 11 | 8  | 9  | 4  | 1  | 3  | 6  | 7  |
| C09794 | 10 | 5  | 11 | 1  | 3  | 8  | 9  | 2  | 6  | 7  | 4  |
| C06422 | 1  | 2  | 3  | 5  | 8  | 9  | 6  | 4  | 10 | 11 | 7  |
| C07484 | 11 | 5  | 3  | 10 | 1  | 6  | 7  | 4  | 8  | 9  | 2  |

|        |    |    |    |    |    |    |    |    |    |    |    |
|--------|----|----|----|----|----|----|----|----|----|----|----|
| C02517 | 3  | 2  | 8  | 6  | 1  | 5  | 10 | 11 | 9  | 7  | 4  |
| C14407 | 11 | 5  | 9  | 10 | 7  | 8  | 4  | 3  | 6  | 2  | 1  |
| C13813 | 3  | 2  | 10 | 1  | 11 | 5  | 6  | 8  | 9  | 7  | 4  |
| C01838 | 3  | 2  | 11 | 8  | 7  | 9  | 5  | 1  | 6  | 10 | 4  |
| C01893 | 8  | 2  | 5  | 4  | 6  | 11 | 9  | 10 | 1  | 3  | 7  |
| C14462 | 11 | 5  | 8  | 2  | 1  | 7  | 4  | 3  | 10 | 6  | 9  |
| C07361 | 9  | 10 | 6  | 5  | 11 | 2  | 8  | 7  | 3  | 1  | 4  |
| C09312 | 10 | 8  | 4  | 5  | 7  | 1  | 9  | 3  | 11 | 2  | 6  |
| C09656 | 10 | 9  | 1  | 3  | 7  | 8  | 5  | 11 | 4  | 2  | 6  |
| C09966 | 9  | 11 | 5  | 10 | 2  | 1  | 4  | 3  | 8  | 6  | 7  |
| C03601 | 3  | 1  | 11 | 6  | 5  | 2  | 9  | 8  | 4  | 10 | 7  |
| C04849 | 3  | 11 | 5  | 10 | 8  | 2  | 7  | 1  | 4  | 6  | 9  |
| C08611 | 9  | 8  | 10 | 11 | 1  | 2  | 4  | 7  | 3  | 6  | 5  |
| C11041 | 11 | 10 | 6  | 5  | 2  | 1  | 4  | 9  | 3  | 8  | 7  |
| C08726 | 10 | 1  | 11 | 5  | 8  | 9  | 4  | 6  | 3  | 2  | 7  |
| C11628 | 1  | 8  | 11 | 5  | 2  | 3  | 9  | 10 | 4  | 6  | 7  |
| C07331 | 2  | 5  | 6  | 8  | 4  | 11 | 1  | 10 | 3  | 7  | 9  |
| C14393 | 11 | 3  | 5  | 8  | 10 | 6  | 1  | 9  | 7  | 2  | 4  |
| C16446 | 11 | 10 | 7  | 2  | 5  | 3  | 8  | 6  | 9  | 1  | 4  |
| C00623 | 1  | 2  | 3  | 8  | 5  | 6  | 9  | 10 | 4  | 11 | 7  |
| C15358 | 3  | 5  | 7  | 6  | 8  | 10 | 11 | 4  | 2  | 9  | 1  |
| C08563 | 10 | 7  | 1  | 11 | 3  | 9  | 2  | 6  | 5  | 4  | 8  |
| C00904 | 1  | 2  | 5  | 11 | 6  | 8  | 9  | 4  | 3  | 7  | 10 |
| C08314 | 3  | 1  | 11 | 6  | 4  | 10 | 8  | 2  | 7  | 9  | 5  |
| C09612 | 10 | 5  | 9  | 3  | 8  | 6  | 11 | 2  | 7  | 1  | 4  |
| C14538 | 11 | 9  | 10 | 6  | 2  | 3  | 8  | 1  | 7  | 4  | 5  |
| C07273 | 5  | 2  | 8  | 6  | 11 | 4  | 1  | 3  | 10 | 7  | 9  |
| C11281 | 10 | 9  | 1  | 11 | 4  | 3  | 6  | 5  | 8  | 2  | 7  |
| C09570 | 11 | 6  | 7  | 4  | 3  | 10 | 8  | 9  | 2  | 5  | 1  |
| C14747 | 11 | 5  | 2  | 9  | 8  | 7  | 10 | 6  | 4  | 3  | 1  |
| C07184 | 10 | 11 | 1  | 8  | 5  | 6  | 2  | 3  | 4  | 9  | 7  |
| C16261 | 3  | 1  | 6  | 5  | 2  | 4  | 11 | 7  | 8  | 9  | 10 |
| C01766 | 9  | 1  | 11 | 8  | 2  | 10 | 7  | 6  | 5  | 4  | 3  |
| C07527 | 11 | 10 | 5  | 9  | 2  | 8  | 1  | 4  | 6  | 3  | 7  |
| C07346 | 3  | 9  | 4  | 6  | 8  | 5  | 10 | 11 | 7  | 1  | 2  |
| C10215 | 11 | 10 | 4  | 1  | 2  | 9  | 6  | 7  | 8  | 5  | 3  |
| C15214 | 11 | 1  | 5  | 10 | 9  | 6  | 2  | 3  | 4  | 7  | 8  |
| C08780 | 9  | 5  | 1  | 2  | 3  | 8  | 10 | 11 | 7  | 4  | 6  |
| C12111 | 9  | 3  | 10 | 5  | 11 | 4  | 2  | 8  | 1  | 6  | 7  |
| C08427 | 10 | 6  | 5  | 11 | 1  | 8  | 2  | 7  | 3  | 9  | 4  |
| C00561 | 1  | 6  | 11 | 2  | 5  | 9  | 10 | 8  | 4  | 7  | 3  |
| C10761 | 11 | 9  | 5  | 10 | 2  | 6  | 1  | 4  | 7  | 8  | 3  |
| C10627 | 3  | 11 | 10 | 5  | 6  | 7  | 4  | 9  | 1  | 8  | 2  |

|        |    |    |    |    |    |    |    |    |    |    |    |
|--------|----|----|----|----|----|----|----|----|----|----|----|
| C08633 | 9  | 3  | 1  | 10 | 4  | 6  | 8  | 11 | 2  | 7  | 5  |
| C02385 | 5  | 2  | 6  | 8  | 10 | 1  | 4  | 3  | 11 | 9  | 7  |
| C03900 | 6  | 8  | 5  | 1  | 2  | 10 | 11 | 9  | 3  | 7  | 4  |
| C00604 | 1  | 2  | 11 | 8  | 5  | 6  | 9  | 10 | 3  | 4  | 7  |
| C09782 | 1  | 10 | 9  | 2  | 8  | 3  | 11 | 4  | 5  | 6  | 7  |
| C01927 | 10 | 11 | 5  | 1  | 9  | 3  | 6  | 4  | 2  | 7  | 8  |
| C02611 | 10 | 8  | 3  | 5  | 4  | 1  | 9  | 6  | 2  | 11 | 7  |
| C14382 | 11 | 9  | 1  | 8  | 7  | 6  | 3  | 2  | 4  | 5  | 10 |
| C13289 | 10 | 9  | 6  | 11 | 5  | 4  | 8  | 3  | 7  | 2  | 1  |
| C06330 | 11 | 5  | 10 | 8  | 3  | 7  | 9  | 1  | 6  | 2  | 4  |
| C14054 | 10 | 5  | 7  | 11 | 3  | 8  | 6  | 4  | 9  | 2  | 1  |
| C09735 | 11 | 10 | 6  | 8  | 1  | 2  | 4  | 7  | 3  | 5  | 9  |
| C14663 | 3  | 9  | 5  | 11 | 1  | 8  | 4  | 2  | 7  | 6  | 10 |
| C14414 | 6  | 10 | 11 | 9  | 2  | 1  | 7  | 5  | 3  | 8  | 4  |
| C11699 | 3  | 6  | 8  | 9  | 11 | 1  | 4  | 10 | 5  | 2  | 7  |
| C04204 | 8  | 9  | 11 | 2  | 5  | 10 | 1  | 4  | 3  | 7  | 6  |
| C04615 | 4  | 6  | 8  | 2  | 5  | 1  | 3  | 9  | 7  | 11 | 10 |
| C10928 | 11 | 3  | 6  | 5  | 2  | 10 | 1  | 8  | 4  | 7  | 9  |
| C14558 | 11 | 2  | 4  | 5  | 7  | 3  | 8  | 1  | 9  | 6  | 10 |
| C06951 | 10 | 8  | 1  | 11 | 4  | 2  | 3  | 6  | 7  | 9  | 5  |
| C08882 | 5  | 4  | 9  | 1  | 6  | 7  | 10 | 3  | 2  | 11 | 8  |
| C07766 | 11 | 9  | 2  | 8  | 3  | 10 | 4  | 6  | 1  | 5  | 7  |
| C03326 | 6  | 2  | 8  | 5  | 7  | 10 | 4  | 9  | 3  | 11 | 1  |
| C12750 | 8  | 1  | 5  | 10 | 2  | 6  | 4  | 3  | 7  | 9  | 11 |
| C10755 | 10 | 9  | 11 | 7  | 3  | 2  | 6  | 1  | 4  | 5  | 8  |
| C09662 | 9  | 2  | 10 | 8  | 6  | 7  | 4  | 11 | 3  | 5  | 1  |
| C05701 | 5  | 2  | 8  | 6  | 1  | 11 | 9  | 10 | 4  | 3  | 7  |
| C07879 | 11 | 10 | 2  | 5  | 3  | 4  | 6  | 1  | 9  | 7  | 8  |
| C01806 | 4  | 10 | 1  | 2  | 5  | 3  | 9  | 6  | 8  | 11 | 7  |
| C02721 | 5  | 2  | 8  | 6  | 11 | 10 | 1  | 9  | 7  | 3  | 4  |
| C11923 | 9  | 2  | 6  | 8  | 4  | 1  | 5  | 3  | 10 | 7  | 11 |
| C00281 | 1  | 2  | 8  | 9  | 7  | 10 | 5  | 4  | 3  | 6  | 11 |
| C10553 | 10 | 1  | 9  | 3  | 11 | 6  | 8  | 5  | 4  | 2  | 7  |
| C11501 | 4  | 2  | 8  | 5  | 9  | 11 | 10 | 1  | 3  | 7  | 6  |
| C12859 | 3  | 9  | 11 | 1  | 2  | 7  | 6  | 10 | 5  | 8  | 4  |
| C14271 | 9  | 10 | 11 | 1  | 6  | 2  | 4  | 3  | 7  | 5  | 8  |
| C10289 | 10 | 5  | 2  | 1  | 9  | 3  | 8  | 6  | 7  | 11 | 4  |
| C10630 | 10 | 9  | 5  | 3  | 1  | 11 | 2  | 6  | 8  | 4  | 7  |
| C08111 | 10 | 9  | 6  | 5  | 1  | 4  | 7  | 8  | 3  | 2  | 11 |
| C08655 | 9  | 2  | 10 | 1  | 11 | 6  | 8  | 3  | 7  | 4  | 5  |
| C14318 | 11 | 10 | 2  | 9  | 7  | 3  | 5  | 4  | 1  | 8  | 6  |
| C12064 | 11 | 5  | 1  | 8  | 2  | 3  | 6  | 7  | 9  | 4  | 10 |
| C15508 | 11 | 2  | 8  | 1  | 3  | 5  | 4  | 6  | 10 | 9  | 7  |



|        |    |    |    |    |    |    |    |    |    |    |    |
|--------|----|----|----|----|----|----|----|----|----|----|----|
| C08070 | 3  | 5  | 11 | 9  | 10 | 2  | 8  | 1  | 6  | 4  | 7  |
| C06861 | 5  | 10 | 11 | 3  | 8  | 1  | 6  | 4  | 7  | 2  | 9  |
| C09545 | 10 | 9  | 11 | 5  | 6  | 8  | 2  | 3  | 1  | 7  | 4  |
| C07935 | 10 | 5  | 11 | 9  | 3  | 8  | 4  | 6  | 1  | 7  | 2  |
| C09276 | 2  | 8  | 6  | 10 | 3  | 1  | 5  | 9  | 11 | 4  | 7  |
| C10036 | 10 | 11 | 5  | 1  | 4  | 7  | 3  | 6  | 2  | 9  | 8  |
| C10174 | 10 | 3  | 1  | 2  | 9  | 5  | 6  | 11 | 8  | 4  | 7  |
| C09059 | 9  | 6  | 7  | 1  | 2  | 8  | 3  | 5  | 4  | 10 | 11 |
| C13515 | 1  | 6  | 2  | 11 | 4  | 9  | 3  | 10 | 8  | 7  | 5  |
| C07052 | 10 | 5  | 2  | 3  | 4  | 7  | 9  | 8  | 1  | 11 | 6  |
| C07255 | 3  | 10 | 5  | 4  | 6  | 9  | 8  | 1  | 11 | 2  | 7  |
| C05394 | 1  | 2  | 8  | 6  | 10 | 9  | 4  | 11 | 3  | 5  | 7  |
| C09394 | 10 | 9  | 3  | 11 | 1  | 5  | 7  | 4  | 2  | 8  | 6  |
| C00936 | 1  | 2  | 10 | 5  | 6  | 8  | 3  | 4  | 11 | 9  | 7  |
| C01969 | 2  | 5  | 8  | 11 | 6  | 7  | 4  | 9  | 1  | 3  | 10 |
| C07693 | 10 | 5  | 3  | 1  | 4  | 2  | 8  | 9  | 7  | 6  | 11 |
| C08079 | 3  | 9  | 11 | 5  | 6  | 4  | 1  | 7  | 8  | 2  | 10 |
| C03666 | 11 | 9  | 2  | 8  | 5  | 1  | 3  | 4  | 6  | 10 | 7  |
| C15681 | 9  | 2  | 5  | 6  | 1  | 3  | 7  | 4  | 8  | 11 | 10 |
| C06748 | 2  | 11 | 6  | 8  | 5  | 4  | 10 | 1  | 9  | 7  | 3  |
| C05537 | 5  | 8  | 6  | 1  | 2  | 11 | 10 | 3  | 7  | 9  | 4  |
| C07503 | 5  | 11 | 10 | 6  | 8  | 1  | 2  | 4  | 3  | 9  | 7  |
| C11305 | 5  | 3  | 2  | 1  | 11 | 4  | 10 | 6  | 9  | 8  | 7  |
| C08090 | 1  | 3  | 9  | 8  | 10 | 4  | 5  | 2  | 11 | 6  | 7  |
| C15477 | 5  | 10 | 11 | 2  | 1  | 7  | 3  | 8  | 4  | 6  | 9  |
| C10119 | 10 | 5  | 3  | 9  | 11 | 6  | 7  | 8  | 1  | 2  | 4  |
| C11493 | 11 | 5  | 1  | 2  | 10 | 8  | 3  | 7  | 9  | 6  | 4  |
| C07908 | 11 | 4  | 8  | 5  | 3  | 2  | 1  | 9  | 6  | 10 | 7  |
| C14691 | 11 | 2  | 5  | 6  | 10 | 1  | 3  | 4  | 7  | 9  | 8  |
| C11053 | 8  | 6  | 10 | 5  | 1  | 2  | 3  | 11 | 4  | 7  | 9  |
| C08534 | 10 | 4  | 1  | 6  | 3  | 9  | 7  | 5  | 8  | 2  | 11 |
| C05461 | 3  | 2  | 9  | 8  | 4  | 6  | 5  | 1  | 10 | 11 | 7  |
| C09671 | 10 | 11 | 8  | 5  | 3  | 9  | 1  | 6  | 4  | 7  | 2  |
| C07832 | 11 | 5  | 2  | 3  | 9  | 10 | 1  | 7  | 6  | 4  | 8  |
| C00113 | 1  | 5  | 8  | 2  | 10 | 3  | 11 | 6  | 9  | 7  | 4  |
| C01729 | 10 | 3  | 2  | 9  | 11 | 6  | 8  | 1  | 5  | 7  | 4  |
| C11285 | 3  | 4  | 6  | 5  | 7  | 8  | 11 | 1  | 2  | 9  | 10 |
| C09396 | 11 | 9  | 7  | 1  | 5  | 3  | 8  | 10 | 4  | 2  | 6  |
| C15473 | 1  | 2  | 5  | 6  | 4  | 11 | 10 | 8  | 3  | 7  | 9  |
| C08902 | 10 | 9  | 3  | 4  | 7  | 6  | 2  | 1  | 8  | 11 | 5  |
| C01592 | 10 | 9  | 5  | 6  | 8  | 11 | 4  | 2  | 3  | 1  | 7  |
| C15605 | 5  | 8  | 2  | 10 | 11 | 1  | 4  | 6  | 3  | 7  | 9  |
| C08354 | 1  | 2  | 8  | 4  | 6  | 9  | 10 | 11 | 7  | 3  | 5  |

|        |    |    |    |    |    |    |    |    |    |    |    |
|--------|----|----|----|----|----|----|----|----|----|----|----|
| C03113 | 2  | 8  | 4  | 1  | 11 | 5  | 9  | 3  | 6  | 7  | 10 |
| C06878 | 9  | 10 | 6  | 5  | 8  | 7  | 1  | 11 | 3  | 4  | 2  |
| C07319 | 5  | 3  | 10 | 11 | 2  | 4  | 6  | 1  | 9  | 7  | 8  |
| C09016 | 1  | 3  | 10 | 6  | 5  | 2  | 9  | 7  | 11 | 4  | 8  |
| C09092 | 9  | 3  | 11 | 1  | 2  | 5  | 10 | 8  | 6  | 4  | 7  |
| C12087 | 5  | 8  | 10 | 3  | 6  | 1  | 2  | 9  | 11 | 4  | 7  |
| C03027 | 2  | 8  | 3  | 6  | 1  | 9  | 7  | 11 | 5  | 4  | 10 |
| C09898 | 9  | 2  | 8  | 11 | 10 | 3  | 5  | 7  | 1  | 4  | 6  |
| C10193 | 10 | 5  | 11 | 1  | 3  | 8  | 2  | 4  | 7  | 9  | 6  |
| C11313 | 4  | 1  | 7  | 11 | 2  | 6  | 3  | 8  | 5  | 10 | 9  |
| C03002 | 10 | 8  | 6  | 3  | 5  | 9  | 7  | 4  | 1  | 2  | 11 |
| C06540 | 10 | 2  | 5  | 3  | 7  | 8  | 9  | 11 | 6  | 4  | 1  |
| C08160 | 3  | 1  | 11 | 2  | 4  | 5  | 9  | 6  | 7  | 10 | 8  |
| C13240 | 1  | 11 | 3  | 2  | 9  | 10 | 6  | 7  | 8  | 5  | 4  |
| C13690 | 4  | 2  | 7  | 5  | 10 | 8  | 1  | 6  | 11 | 3  | 9  |
| C16459 | 11 | 1  | 2  | 6  | 5  | 3  | 7  | 9  | 8  | 10 | 4  |
| C11514 | 5  | 1  | 9  | 2  | 10 | 6  | 7  | 11 | 3  | 4  | 8  |
| C12013 | 6  | 10 | 1  | 7  | 9  | 4  | 11 | 3  | 5  | 2  | 8  |
| C09085 | 10 | 5  | 9  | 7  | 3  | 6  | 2  | 4  | 8  | 11 | 1  |
| C10420 | 10 | 6  | 5  | 4  | 1  | 3  | 8  | 7  | 9  | 11 | 2  |
| C08247 | 10 | 1  | 3  | 11 | 6  | 2  | 8  | 5  | 7  | 9  | 4  |
| C07630 | 8  | 9  | 5  | 10 | 11 | 2  | 4  | 7  | 3  | 1  | 6  |
| C08619 | 10 | 9  | 5  | 3  | 11 | 8  | 2  | 6  | 1  | 7  | 4  |
| C06838 | 9  | 10 | 6  | 4  | 11 | 1  | 5  | 7  | 2  | 3  | 8  |
| C14404 | 11 | 5  | 1  | 2  | 3  | 9  | 4  | 10 | 8  | 6  | 7  |
| C11640 | 8  | 9  | 11 | 5  | 7  | 6  | 3  | 4  | 10 | 2  | 1  |
| C10985 | 11 | 1  | 9  | 10 | 2  | 5  | 3  | 6  | 7  | 8  | 4  |
| C07132 | 10 | 8  | 5  | 11 | 2  | 7  | 3  | 1  | 9  | 4  | 6  |
| C12009 | 9  | 11 | 10 | 2  | 4  | 3  | 5  | 8  | 6  | 7  | 1  |
| C10389 | 2  | 10 | 11 | 4  | 8  | 3  | 6  | 9  | 5  | 7  | 1  |
| C10496 | 11 | 4  | 6  | 2  | 7  | 3  | 8  | 1  | 9  | 5  | 10 |
| C08287 | 6  | 5  | 8  | 2  | 9  | 1  | 11 | 7  | 3  | 4  | 10 |
| C15933 | 1  | 9  | 8  | 5  | 2  | 10 | 3  | 7  | 4  | 6  | 11 |
| C10712 | 11 | 10 | 9  | 5  | 8  | 1  | 7  | 2  | 3  | 6  | 4  |
| C11609 | 1  | 2  | 6  | 5  | 8  | 9  | 10 | 4  | 11 | 7  | 3  |
| C06339 | 2  | 8  | 9  | 11 | 5  | 1  | 3  | 6  | 10 | 4  | 7  |
| C06385 | 2  | 6  | 4  | 5  | 1  | 11 | 9  | 10 | 3  | 7  | 8  |
| C09398 | 10 | 1  | 3  | 5  | 9  | 7  | 2  | 11 | 8  | 6  | 4  |
| C10960 | 9  | 11 | 7  | 1  | 5  | 10 | 8  | 2  | 3  | 6  | 4  |
| C01718 | 5  | 6  | 2  | 8  | 10 | 1  | 11 | 4  | 3  | 7  | 9  |
| C06313 | 5  | 8  | 10 | 2  | 6  | 4  | 11 | 9  | 3  | 7  | 1  |
| C13773 | 6  | 5  | 2  | 4  | 10 | 8  | 11 | 1  | 7  | 3  | 9  |
| C14443 | 11 | 10 | 8  | 2  | 9  | 4  | 5  | 7  | 3  | 6  | 1  |

|        |    |    |    |    |    |    |    |    |    |    |   |
|--------|----|----|----|----|----|----|----|----|----|----|---|
| C14173 | 10 | 11 | 5  | 9  | 8  | 1  | 3  | 4  | 2  | 6  | 7 |
| C07308 | 1  | 2  | 5  | 6  | 8  | 10 | 3  | 11 | 7  | 4  | 9 |
| C06875 | 3  | 10 | 11 | 4  | 9  | 8  | 6  | 1  | 5  | 7  | 2 |
| C09626 | 3  | 10 | 1  | 2  | 4  | 11 | 6  | 9  | 7  | 8  | 5 |
| C14211 | 11 | 8  | 3  | 4  | 1  | 5  | 10 | 2  | 7  | 9  | 6 |
| C08574 | 10 | 6  | 5  | 4  | 1  | 3  | 8  | 9  | 7  | 11 | 2 |
| C11200 | 11 | 8  | 7  | 4  | 1  | 9  | 6  | 3  | 2  | 10 | 5 |
| C08094 | 4  | 9  | 6  | 10 | 11 | 2  | 3  | 5  | 8  | 1  | 7 |
| C07653 | 3  | 11 | 5  | 1  | 6  | 10 | 4  | 2  | 8  | 7  | 9 |
| C03207 | 3  | 2  | 8  | 6  | 11 | 1  | 5  | 9  | 10 | 7  | 4 |
| C14139 | 11 | 5  | 3  | 2  | 8  | 4  | 7  | 1  | 10 | 9  | 6 |
| C03865 | 6  | 2  | 8  | 1  | 9  | 3  | 7  | 11 | 10 | 5  | 4 |
| C11639 | 11 | 1  | 9  | 7  | 2  | 4  | 3  | 8  | 5  | 10 | 6 |
| C14751 | 10 | 3  | 1  | 9  | 11 | 2  | 8  | 6  | 5  | 4  | 7 |
| C07511 | 10 | 5  | 6  | 8  | 3  | 1  | 11 | 2  | 4  | 9  | 7 |
| C02024 | 1  | 2  | 11 | 3  | 8  | 9  | 4  | 5  | 10 | 6  | 7 |
| C11648 | 10 | 9  | 8  | 5  | 11 | 2  | 1  | 6  | 3  | 7  | 4 |
| C12046 | 3  | 4  | 1  | 2  | 11 | 6  | 7  | 10 | 9  | 5  | 8 |
| C08021 | 11 | 10 | 5  | 1  | 2  | 4  | 6  | 7  | 3  | 9  | 8 |
| C12651 | 5  | 10 | 9  | 11 | 8  | 2  | 4  | 7  | 1  | 3  | 6 |
| C11260 | 3  | 11 | 6  | 5  | 4  | 10 | 8  | 9  | 1  | 2  | 7 |
| C10393 | 10 | 8  | 5  | 11 | 3  | 6  | 9  | 1  | 7  | 4  | 2 |
| C10607 | 8  | 9  | 5  | 4  | 2  | 1  | 11 | 3  | 10 | 6  | 7 |
| C11752 | 11 | 5  | 10 | 7  | 1  | 2  | 3  | 6  | 4  | 8  | 9 |
| C12574 | 5  | 9  | 10 | 11 | 8  | 1  | 2  | 6  | 4  | 7  | 3 |
| C10400 | 10 | 5  | 6  | 2  | 11 | 4  | 7  | 3  | 1  | 8  | 9 |
| C14336 | 11 | 10 | 9  | 3  | 8  | 6  | 2  | 7  | 1  | 4  | 5 |
| C04716 | 4  | 1  | 9  | 3  | 10 | 6  | 5  | 7  | 2  | 11 | 8 |
| C03575 | 5  | 9  | 11 | 10 | 4  | 6  | 3  | 7  | 1  | 2  | 8 |
| C14212 | 3  | 11 | 10 | 1  | 9  | 7  | 4  | 6  | 8  | 2  | 5 |
| C02810 | 1  | 2  | 8  | 6  | 5  | 10 | 9  | 7  | 3  | 11 | 4 |
| C01869 | 5  | 10 | 3  | 11 | 9  | 8  | 2  | 7  | 1  | 4  | 6 |
| C04881 | 1  | 4  | 9  | 10 | 7  | 3  | 6  | 5  | 11 | 2  | 8 |
| C07934 | 11 | 10 | 2  | 9  | 6  | 3  | 8  | 5  | 1  | 4  | 7 |
| C09555 | 10 | 11 | 9  | 5  | 6  | 1  | 8  | 2  | 3  | 7  | 4 |
| C07398 | 1  | 3  | 5  | 2  | 8  | 9  | 10 | 11 | 7  | 6  | 4 |
| C10417 | 10 | 2  | 8  | 9  | 4  | 11 | 1  | 6  | 3  | 5  | 7 |
| C10544 | 5  | 10 | 11 | 8  | 7  | 1  | 2  | 9  | 6  | 4  | 3 |
| C13674 | 6  | 5  | 8  | 2  | 1  | 10 | 11 | 3  | 9  | 4  | 7 |
| C06924 | 5  | 10 | 11 | 8  | 6  | 2  | 1  | 3  | 9  | 4  | 7 |
| C08694 | 10 | 5  | 11 | 2  | 1  | 9  | 4  | 3  | 6  | 7  | 8 |
| C14535 | 11 | 6  | 5  | 2  | 8  | 3  | 10 | 9  | 4  | 1  | 7 |
| C07641 | 11 | 9  | 10 | 4  | 2  | 8  | 5  | 1  | 3  | 6  | 7 |

|        |    |    |    |    |    |    |    |    |    |    |    |
|--------|----|----|----|----|----|----|----|----|----|----|----|
| C01949 | 11 | 1  | 3  | 2  | 8  | 5  | 6  | 10 | 4  | 9  | 7  |
| C06884 | 5  | 10 | 8  | 4  | 6  | 7  | 2  | 3  | 1  | 11 | 9  |
| C15734 | 2  | 10 | 7  | 4  | 9  | 5  | 3  | 1  | 8  | 6  | 11 |
| C12143 | 1  | 9  | 11 | 5  | 2  | 4  | 7  | 10 | 3  | 6  | 8  |
| C15586 | 4  | 5  | 9  | 11 | 10 | 1  | 2  | 8  | 7  | 6  | 3  |
| C09842 | 11 | 9  | 8  | 1  | 10 | 2  | 3  | 4  | 7  | 5  | 6  |
| C13720 | 11 | 3  | 8  | 9  | 2  | 6  | 4  | 10 | 1  | 7  | 5  |
| C11282 | 10 | 9  | 5  | 11 | 6  | 8  | 1  | 2  | 3  | 7  | 4  |
| C08471 | 9  | 10 | 6  | 5  | 11 | 3  | 1  | 2  | 8  | 4  | 7  |
| C13776 | 10 | 2  | 1  | 4  | 5  | 11 | 9  | 6  | 3  | 7  | 8  |
| C10369 | 11 | 1  | 3  | 10 | 2  | 6  | 5  | 9  | 8  | 7  | 4  |
| C00652 | 1  | 2  | 8  | 6  | 7  | 10 | 11 | 9  | 3  | 4  | 5  |
| C01493 | 9  | 1  | 3  | 8  | 2  | 7  | 6  | 10 | 5  | 4  | 11 |
| C11489 | 2  | 1  | 11 | 8  | 10 | 3  | 6  | 5  | 4  | 9  | 7  |
| C01517 | 3  | 11 | 10 | 5  | 8  | 2  | 9  | 1  | 4  | 6  | 7  |
| C01570 | 5  | 6  | 1  | 2  | 8  | 10 | 4  | 3  | 11 | 9  | 7  |
| C09909 | 9  | 11 | 5  | 2  | 7  | 8  | 10 | 3  | 1  | 6  | 4  |
| C14473 | 11 | 8  | 9  | 10 | 2  | 1  | 7  | 5  | 3  | 4  | 6  |
| C15227 | 1  | 5  | 2  | 6  | 8  | 4  | 10 | 3  | 11 | 9  | 7  |
| C07751 | 10 | 1  | 2  | 5  | 4  | 9  | 3  | 11 | 7  | 6  | 8  |
| C11246 | 3  | 4  | 10 | 2  | 8  | 11 | 7  | 9  | 6  | 1  | 5  |
| C12531 | 8  | 11 | 4  | 3  | 9  | 5  | 1  | 2  | 10 | 7  | 6  |
| C09517 | 5  | 4  | 11 | 6  | 7  | 1  | 10 | 3  | 8  | 9  | 2  |
| C14380 | 3  | 7  | 11 | 2  | 8  | 9  | 5  | 4  | 6  | 10 | 1  |
| C00708 | 1  | 2  | 5  | 8  | 6  | 11 | 4  | 3  | 10 | 9  | 7  |
| C08887 | 1  | 10 | 11 | 9  | 7  | 8  | 6  | 3  | 4  | 2  | 5  |
| C01835 | 1  | 2  | 9  | 4  | 10 | 3  | 11 | 7  | 8  | 6  | 5  |
| C07770 | 9  | 10 | 6  | 5  | 11 | 2  | 4  | 1  | 3  | 8  | 7  |
| C11293 | 8  | 1  | 5  | 11 | 2  | 10 | 3  | 9  | 6  | 4  | 7  |
| C15919 | 9  | 1  | 8  | 2  | 5  | 7  | 10 | 3  | 11 | 6  | 4  |
| C08900 | 1  | 10 | 4  | 11 | 2  | 9  | 5  | 3  | 6  | 7  | 8  |
| C09490 | 5  | 6  | 7  | 2  | 10 | 4  | 11 | 8  | 1  | 3  | 9  |
| C11166 | 1  | 3  | 5  | 2  | 11 | 6  | 8  | 10 | 9  | 7  | 4  |
| C11625 | 1  | 3  | 11 | 9  | 2  | 10 | 8  | 7  | 6  | 5  | 4  |
| C09367 | 10 | 5  | 6  | 7  | 4  | 2  | 9  | 3  | 11 | 1  | 8  |
| C11120 | 5  | 10 | 2  | 1  | 6  | 3  | 4  | 8  | 11 | 7  | 9  |
| C02045 | 1  | 2  | 8  | 6  | 5  | 9  | 3  | 7  | 11 | 10 | 4  |
| C04446 | 6  | 9  | 2  | 5  | 1  | 7  | 8  | 3  | 10 | 11 | 4  |
| C09162 | 5  | 10 | 3  | 2  | 4  | 11 | 9  | 7  | 1  | 6  | 8  |
| C11654 | 9  | 2  | 8  | 1  | 11 | 3  | 4  | 5  | 7  | 6  | 10 |
| C08501 | 11 | 5  | 9  | 1  | 3  | 6  | 7  | 10 | 2  | 8  | 4  |
| C10453 | 9  | 11 | 10 | 1  | 5  | 3  | 2  | 6  | 8  | 7  | 4  |
| C02497 | 1  | 2  | 8  | 3  | 5  | 11 | 10 | 9  | 4  | 7  | 6  |

|        |    |    |    |    |    |    |    |    |    |    |    |
|--------|----|----|----|----|----|----|----|----|----|----|----|
| C14245 | 3  | 11 | 5  | 2  | 8  | 1  | 6  | 9  | 10 | 7  | 4  |
| C04284 | 2  | 8  | 1  | 11 | 6  | 5  | 10 | 3  | 4  | 9  | 7  |
| C05119 | 8  | 5  | 3  | 1  | 4  | 7  | 11 | 2  | 9  | 6  | 10 |
| C01324 | 1  | 2  | 11 | 8  | 5  | 6  | 4  | 3  | 10 | 9  | 7  |
| C07628 | 3  | 6  | 5  | 1  | 2  | 11 | 8  | 10 | 9  | 4  | 7  |
| C13031 | 3  | 9  | 11 | 10 | 2  | 4  | 8  | 1  | 7  | 5  | 6  |
| C08582 | 9  | 10 | 8  | 11 | 4  | 6  | 5  | 2  | 1  | 3  | 7  |
| C14294 | 11 | 5  | 8  | 1  | 9  | 2  | 3  | 4  | 7  | 6  | 10 |
| C06860 | 5  | 2  | 10 | 8  | 11 | 6  | 9  | 4  | 1  | 3  | 7  |
| C02217 | 2  | 8  | 11 | 6  | 10 | 9  | 5  | 3  | 7  | 4  | 1  |
| C10403 | 10 | 6  | 5  | 9  | 2  | 7  | 1  | 4  | 3  | 11 | 8  |
| C13875 | 3  | 1  | 9  | 2  | 5  | 10 | 11 | 7  | 4  | 8  | 6  |
| C10210 | 10 | 5  | 8  | 11 | 1  | 6  | 2  | 7  | 4  | 3  | 9  |
| C02297 | 11 | 5  | 6  | 8  | 4  | 1  | 10 | 9  | 3  | 7  | 2  |
| C08693 | 10 | 9  | 7  | 1  | 4  | 8  | 11 | 3  | 5  | 2  | 6  |
| C09980 | 10 | 2  | 5  | 4  | 11 | 1  | 3  | 6  | 8  | 7  | 9  |
| C07247 | 5  | 10 | 4  | 3  | 9  | 2  | 6  | 11 | 7  | 1  | 8  |
| C11368 | 9  | 10 | 8  | 2  | 6  | 1  | 5  | 3  | 4  | 7  | 11 |
| C05155 | 8  | 2  | 5  | 1  | 7  | 3  | 10 | 6  | 9  | 4  | 11 |
| C10427 | 6  | 1  | 9  | 2  | 7  | 8  | 3  | 4  | 10 | 5  | 11 |
| C03441 | 5  | 2  | 6  | 8  | 1  | 10 | 11 | 3  | 4  | 9  | 7  |
| C09324 | 10 | 2  | 1  | 9  | 11 | 3  | 6  | 5  | 4  | 7  | 8  |
| C09598 | 10 | 8  | 11 | 1  | 7  | 5  | 3  | 2  | 4  | 9  | 6  |
| C00773 | 1  | 5  | 10 | 11 | 3  | 6  | 8  | 2  | 9  | 4  | 7  |
| C11016 | 9  | 11 | 2  | 8  | 1  | 4  | 6  | 5  | 10 | 7  | 3  |
| C11208 | 11 | 9  | 1  | 3  | 5  | 7  | 8  | 6  | 2  | 4  | 10 |
| C00660 | 1  | 2  | 5  | 10 | 3  | 4  | 9  | 8  | 11 | 7  | 6  |
| C01008 | 2  | 5  | 6  | 8  | 3  | 7  | 10 | 1  | 11 | 9  | 4  |
| C11770 | 3  | 5  | 10 | 4  | 1  | 2  | 9  | 8  | 11 | 6  | 7  |
| C10730 | 8  | 2  | 5  | 9  | 11 | 6  | 7  | 3  | 4  | 10 | 1  |
| C13915 | 3  | 1  | 10 | 4  | 6  | 2  | 11 | 9  | 8  | 5  | 7  |
| C10857 | 10 | 11 | 2  | 6  | 8  | 9  | 4  | 3  | 7  | 5  | 1  |
| C06961 | 10 | 5  | 4  | 11 | 3  | 1  | 6  | 9  | 2  | 7  | 8  |
| C13807 | 3  | 6  | 10 | 5  | 9  | 11 | 2  | 7  | 4  | 8  | 1  |
| C06847 | 10 | 2  | 3  | 1  | 4  | 5  | 9  | 8  | 7  | 6  | 11 |
| C04671 | 3  | 8  | 2  | 1  | 10 | 9  | 5  | 11 | 7  | 4  | 6  |
| C07194 | 5  | 10 | 11 | 4  | 6  | 9  | 8  | 1  | 2  | 3  | 7  |
| C02652 | 5  | 2  | 8  | 6  | 10 | 11 | 9  | 4  | 3  | 1  | 7  |
| C14511 | 11 | 1  | 2  | 3  | 7  | 10 | 5  | 6  | 8  | 9  | 4  |
| C12724 | 3  | 9  | 7  | 1  | 6  | 2  | 8  | 5  | 11 | 10 | 4  |
| C07764 | 2  | 5  | 11 | 6  | 1  | 4  | 9  | 8  | 10 | 3  | 7  |
| C08086 | 4  | 2  | 6  | 1  | 7  | 9  | 11 | 10 | 5  | 3  | 8  |
| C02451 | 5  | 11 | 3  | 1  | 6  | 8  | 2  | 9  | 4  | 7  | 10 |

|        |    |    |    |    |    |    |    |    |    |    |    |
|--------|----|----|----|----|----|----|----|----|----|----|----|
| C04700 | 2  | 4  | 5  | 7  | 11 | 1  | 9  | 3  | 8  | 6  | 10 |
| C14440 | 1  | 2  | 11 | 4  | 8  | 3  | 6  | 5  | 9  | 7  | 10 |
| C04277 | 8  | 2  | 11 | 6  | 7  | 9  | 1  | 4  | 3  | 5  | 10 |
| C06975 | 10 | 11 | 5  | 2  | 4  | 7  | 9  | 6  | 3  | 1  | 8  |
| C08456 | 11 | 5  | 6  | 10 | 7  | 8  | 1  | 3  | 4  | 9  | 2  |
| C16460 | 11 | 6  | 10 | 5  | 7  | 3  | 4  | 9  | 2  | 1  | 8  |
| C02479 | 1  | 2  | 8  | 5  | 4  | 6  | 11 | 10 | 9  | 7  | 3  |
| C00202 | 11 | 2  | 10 | 1  | 6  | 3  | 8  | 5  | 7  | 9  | 4  |
| C11089 | 11 | 5  | 8  | 1  | 6  | 2  | 10 | 9  | 3  | 7  | 4  |
| C05328 | 5  | 8  | 10 | 11 | 2  | 7  | 4  | 3  | 1  | 9  | 6  |
| C07329 | 1  | 11 | 5  | 2  | 9  | 3  | 6  | 10 | 8  | 4  | 7  |
| C03727 | 5  | 11 | 10 | 1  | 2  | 8  | 6  | 9  | 7  | 4  | 3  |
| C09590 | 10 | 4  | 9  | 3  | 2  | 6  | 1  | 11 | 8  | 7  | 5  |
| C11078 | 11 | 9  | 10 | 5  | 8  | 2  | 6  | 7  | 1  | 4  | 3  |
| C09360 | 10 | 4  | 6  | 7  | 11 | 1  | 3  | 5  | 2  | 9  | 8  |
| C08237 | 9  | 1  | 8  | 11 | 5  | 7  | 3  | 6  | 4  | 10 | 2  |
| C02753 | 1  | 2  | 8  | 6  | 7  | 10 | 11 | 3  | 4  | 5  | 9  |
| C06696 | 1  | 2  | 5  | 3  | 8  | 6  | 9  | 4  | 10 | 7  | 11 |
| C10272 | 5  | 1  | 3  | 9  | 6  | 10 | 2  | 7  | 11 | 4  | 8  |
| C10378 | 10 | 11 | 5  | 6  | 7  | 4  | 8  | 3  | 1  | 2  | 9  |
| C08996 | 11 | 10 | 5  | 2  | 8  | 9  | 1  | 3  | 6  | 4  | 7  |
| C13377 | 2  | 6  | 1  | 5  | 11 | 8  | 10 | 3  | 4  | 9  | 7  |
| C01733 | 5  | 2  | 6  | 1  | 8  | 10 | 4  | 9  | 3  | 11 | 7  |
| C07359 | 11 | 10 | 8  | 2  | 1  | 3  | 4  | 9  | 7  | 5  | 6  |
| C03764 | 11 | 6  | 5  | 8  | 4  | 1  | 9  | 10 | 2  | 3  | 7  |
| C08328 | 6  | 7  | 11 | 9  | 10 | 4  | 3  | 5  | 8  | 2  | 1  |
| C10186 | 10 | 5  | 11 | 2  | 9  | 4  | 3  | 7  | 6  | 8  | 1  |
| C10689 | 10 | 8  | 2  | 7  | 3  | 6  | 5  | 4  | 9  | 1  | 11 |
| C02394 | 10 | 9  | 11 | 2  | 5  | 1  | 6  | 8  | 3  | 4  | 7  |
| C03425 | 3  | 8  | 9  | 5  | 10 | 11 | 1  | 2  | 6  | 4  | 7  |
| C08665 | 10 | 8  | 4  | 6  | 3  | 2  | 11 | 5  | 7  | 9  | 1  |
| C13742 | 4  | 1  | 2  | 9  | 11 | 5  | 10 | 3  | 8  | 7  | 6  |
| C00779 | 2  | 6  | 8  | 5  | 1  | 11 | 9  | 3  | 10 | 4  | 7  |
| C09531 | 2  | 1  | 7  | 9  | 6  | 10 | 5  | 11 | 8  | 3  | 4  |
| C02243 | 6  | 2  | 8  | 10 | 11 | 3  | 5  | 9  | 1  | 7  | 4  |
| C09929 | 10 | 3  | 2  | 9  | 7  | 8  | 6  | 11 | 1  | 5  | 4  |
| C15224 | 11 | 6  | 1  | 5  | 9  | 10 | 7  | 3  | 4  | 2  | 8  |
| C11458 | 5  | 11 | 4  | 8  | 9  | 2  | 1  | 3  | 7  | 10 | 6  |
| C07964 | 5  | 1  | 11 | 2  | 10 | 3  | 8  | 4  | 7  | 6  | 9  |
| C14127 | 9  | 5  | 8  | 7  | 6  | 1  | 3  | 11 | 4  | 2  | 10 |
| C07915 | 10 | 1  | 5  | 3  | 2  | 4  | 8  | 11 | 6  | 9  | 7  |
| C14400 | 11 | 3  | 1  | 7  | 6  | 9  | 4  | 2  | 8  | 5  | 10 |
| C14326 | 11 | 10 | 9  | 2  | 1  | 3  | 7  | 6  | 8  | 5  | 4  |

|        |    |    |    |    |    |    |    |    |    |    |    |
|--------|----|----|----|----|----|----|----|----|----|----|----|
| C13493 | 3  | 5  | 11 | 1  | 6  | 2  | 7  | 8  | 10 | 9  | 4  |
| C09669 | 10 | 11 | 2  | 5  | 8  | 4  | 7  | 6  | 3  | 1  | 9  |
| C00918 | 1  | 9  | 5  | 11 | 10 | 6  | 2  | 3  | 8  | 4  | 7  |
| C08667 | 10 | 9  | 11 | 5  | 6  | 3  | 1  | 8  | 2  | 4  | 7  |
| C16450 | 11 | 8  | 4  | 3  | 5  | 1  | 2  | 9  | 10 | 6  | 7  |
| C12299 | 9  | 11 | 5  | 10 | 3  | 2  | 6  | 8  | 1  | 7  | 4  |
| C06392 | 3  | 11 | 10 | 4  | 5  | 6  | 8  | 2  | 1  | 9  | 7  |
| C07274 | 10 | 5  | 11 | 8  | 2  | 4  | 6  | 3  | 7  | 1  | 9  |
| C10875 | 11 | 10 | 6  | 4  | 5  | 3  | 1  | 2  | 7  | 8  | 9  |
| C15182 | 6  | 4  | 11 | 8  | 5  | 2  | 9  | 3  | 10 | 1  | 7  |
| C14367 | 11 | 8  | 4  | 2  | 1  | 5  | 7  | 3  | 6  | 9  | 10 |
| C11336 | 1  | 2  | 6  | 5  | 8  | 10 | 11 | 4  | 9  | 3  | 7  |
| C06371 | 1  | 2  | 8  | 10 | 7  | 4  | 5  | 11 | 9  | 3  | 6  |
| C09409 | 3  | 2  | 11 | 1  | 8  | 4  | 7  | 6  | 10 | 9  | 5  |
| C03860 | 2  | 4  | 6  | 8  | 5  | 10 | 1  | 3  | 11 | 7  | 9  |
| C08707 | 9  | 3  | 4  | 6  | 8  | 7  | 1  | 2  | 5  | 11 | 10 |
| C15480 | 1  | 10 | 7  | 2  | 5  | 11 | 8  | 4  | 3  | 9  | 6  |
| C01716 | 3  | 11 | 1  | 10 | 9  | 2  | 5  | 8  | 7  | 6  | 4  |
| C07974 | 4  | 10 | 2  | 9  | 5  | 3  | 8  | 1  | 6  | 7  | 11 |
| C00494 | 10 | 9  | 5  | 6  | 2  | 11 | 1  | 3  | 8  | 7  | 4  |
| C07663 | 9  | 10 | 11 | 5  | 8  | 4  | 7  | 3  | 1  | 2  | 6  |
| C14711 | 10 | 2  | 1  | 5  | 6  | 8  | 4  | 11 | 3  | 7  | 9  |
| C15674 | 8  | 2  | 1  | 5  | 6  | 11 | 9  | 10 | 3  | 4  | 7  |
| C14502 | 3  | 8  | 2  | 10 | 11 | 5  | 9  | 4  | 7  | 1  | 6  |
| C09886 | 11 | 5  | 10 | 8  | 3  | 9  | 6  | 1  | 2  | 7  | 4  |
| C11592 | 2  | 11 | 1  | 6  | 5  | 8  | 4  | 9  | 3  | 10 | 7  |
| C16015 | 11 | 10 | 5  | 8  | 2  | 7  | 6  | 9  | 3  | 1  | 4  |
| C07165 | 10 | 11 | 2  | 5  | 9  | 3  | 6  | 4  | 7  | 8  | 1  |
| C08914 | 3  | 4  | 9  | 1  | 5  | 10 | 11 | 2  | 6  | 8  | 7  |
| C10452 | 9  | 5  | 11 | 10 | 8  | 4  | 2  | 6  | 1  | 3  | 7  |
| C03910 | 3  | 5  | 11 | 1  | 2  | 10 | 6  | 7  | 8  | 4  | 9  |
| C09216 | 10 | 3  | 11 | 2  | 8  | 6  | 4  | 1  | 9  | 7  | 5  |
| C07219 | 5  | 3  | 1  | 11 | 6  | 10 | 4  | 7  | 9  | 8  | 2  |
| C10782 | 10 | 9  | 1  | 7  | 8  | 5  | 11 | 3  | 6  | 2  | 4  |
| C15229 | 11 | 5  | 2  | 10 | 3  | 4  | 9  | 8  | 1  | 6  | 7  |
| C13197 | 1  | 2  | 5  | 8  | 11 | 6  | 3  | 9  | 10 | 4  | 7  |
| C04425 | 8  | 2  | 6  | 5  | 9  | 4  | 11 | 7  | 1  | 3  | 10 |
| C08589 | 9  | 1  | 4  | 10 | 3  | 5  | 8  | 11 | 2  | 6  | 7  |
| C07811 | 10 | 8  | 9  | 1  | 3  | 6  | 2  | 11 | 5  | 7  | 4  |
| C10043 | 10 | 1  | 11 | 5  | 8  | 2  | 3  | 9  | 6  | 7  | 4  |
| C07432 | 5  | 10 | 1  | 9  | 6  | 3  | 8  | 2  | 11 | 7  | 4  |
| C01017 | 5  | 10 | 8  | 11 | 1  | 2  | 6  | 9  | 3  | 4  | 7  |
| C11276 | 11 | 10 | 4  | 5  | 9  | 1  | 7  | 2  | 3  | 6  | 8  |

|        |    |    |    |    |    |    |    |    |    |    |    |
|--------|----|----|----|----|----|----|----|----|----|----|----|
| C12287 | 9  | 8  | 10 | 2  | 5  | 11 | 4  | 1  | 3  | 6  | 7  |
| C02635 | 5  | 2  | 6  | 8  | 3  | 1  | 4  | 11 | 10 | 9  | 7  |
| C03932 | 1  | 2  | 9  | 4  | 10 | 8  | 6  | 11 | 3  | 5  | 7  |
| C06264 | 1  | 2  | 5  | 11 | 8  | 6  | 3  | 9  | 4  | 7  | 10 |
| C10455 | 3  | 9  | 1  | 5  | 11 | 2  | 10 | 7  | 8  | 4  | 6  |
| C11605 | 3  | 8  | 7  | 1  | 10 | 4  | 11 | 2  | 5  | 6  | 9  |
| C01162 | 2  | 5  | 6  | 9  | 1  | 8  | 7  | 3  | 10 | 11 | 4  |
| C14167 | 10 | 6  | 8  | 7  | 2  | 4  | 11 | 3  | 9  | 5  | 1  |
| C07129 | 5  | 10 | 2  | 4  | 11 | 9  | 8  | 6  | 3  | 1  | 7  |
| C01244 | 6  | 8  | 2  | 1  | 5  | 10 | 4  | 11 | 3  | 7  | 9  |
| C07743 | 10 | 1  | 2  | 9  | 4  | 5  | 8  | 3  | 6  | 7  | 11 |
| C07155 | 5  | 10 | 3  | 11 | 1  | 8  | 6  | 4  | 9  | 2  | 7  |
| C05060 | 11 | 10 | 5  | 1  | 8  | 2  | 3  | 6  | 9  | 4  | 7  |
| C10640 | 8  | 2  | 7  | 4  | 3  | 10 | 11 | 5  | 6  | 1  | 9  |
| C07164 | 5  | 10 | 6  | 11 | 8  | 1  | 2  | 9  | 3  | 7  | 4  |
| C07460 | 5  | 8  | 2  | 4  | 11 | 6  | 1  | 7  | 3  | 9  | 10 |
| C02825 | 2  | 4  | 5  | 1  | 8  | 11 | 6  | 10 | 7  | 3  | 9  |
| C10065 | 2  | 8  | 6  | 9  | 11 | 5  | 4  | 3  | 10 | 1  | 7  |
| C14122 | 11 | 9  | 5  | 10 | 4  | 1  | 7  | 3  | 8  | 6  | 2  |
| C07545 | 10 | 5  | 3  | 11 | 4  | 2  | 6  | 1  | 7  | 9  | 8  |
| C09781 | 1  | 10 | 3  | 9  | 11 | 2  | 6  | 4  | 5  | 8  | 7  |
| C11025 | 11 | 10 | 9  | 2  | 5  | 3  | 1  | 6  | 4  | 8  | 7  |
| C02256 | 1  | 11 | 10 | 9  | 6  | 7  | 2  | 3  | 4  | 8  | 5  |
| C10365 | 11 | 3  | 9  | 7  | 6  | 1  | 2  | 5  | 8  | 4  | 10 |
| C01507 | 1  | 2  | 5  | 8  | 6  | 10 | 3  | 11 | 9  | 4  | 7  |
| C09321 | 10 | 8  | 11 | 5  | 4  | 2  | 6  | 1  | 3  | 9  | 7  |
| C09322 | 10 | 11 | 2  | 4  | 9  | 1  | 5  | 7  | 6  | 3  | 8  |
| C12016 | 7  | 6  | 9  | 2  | 4  | 8  | 1  | 11 | 10 | 3  | 5  |
| C04109 | 10 | 5  | 9  | 6  | 4  | 8  | 3  | 11 | 7  | 1  | 2  |
| C04337 | 5  | 10 | 2  | 6  | 8  | 3  | 4  | 9  | 11 | 1  | 7  |
| C07156 | 5  | 10 | 11 | 3  | 9  | 8  | 6  | 4  | 1  | 7  | 2  |
| C03394 | 2  | 1  | 8  | 11 | 3  | 9  | 10 | 4  | 6  | 5  | 7  |
| C11509 | 2  | 8  | 11 | 4  | 1  | 3  | 7  | 9  | 10 | 5  | 6  |
| C14338 | 11 | 1  | 3  | 4  | 7  | 6  | 8  | 9  | 2  | 10 | 5  |
| C11856 | 9  | 4  | 11 | 6  | 7  | 5  | 3  | 10 | 2  | 1  | 8  |
| C13355 | 5  | 10 | 8  | 6  | 3  | 1  | 9  | 4  | 2  | 11 | 7  |
| C14350 | 11 | 3  | 9  | 4  | 10 | 1  | 5  | 7  | 2  | 6  | 8  |
| C09675 | 9  | 11 | 4  | 5  | 10 | 7  | 8  | 3  | 2  | 6  | 1  |
| C11833 | 10 | 6  | 9  | 2  | 5  | 7  | 1  | 8  | 4  | 3  | 11 |
| C11259 | 6  | 5  | 10 | 4  | 7  | 9  | 2  | 8  | 3  | 11 | 1  |
| C14579 | 11 | 10 | 5  | 1  | 8  | 6  | 7  | 3  | 2  | 4  | 9  |
| C10950 | 11 | 10 | 1  | 8  | 3  | 7  | 2  | 9  | 5  | 4  | 6  |
| C09701 | 4  | 1  | 6  | 11 | 7  | 3  | 10 | 2  | 8  | 9  | 5  |



|        |    |    |    |    |    |    |    |    |    |    |    |
|--------|----|----|----|----|----|----|----|----|----|----|----|
| C09611 | 10 | 11 | 4  | 7  | 3  | 2  | 5  | 1  | 6  | 8  | 9  |
| C09459 | 11 | 7  | 9  | 5  | 10 | 8  | 3  | 4  | 1  | 2  | 6  |
| C06831 | 3  | 8  | 11 | 4  | 1  | 9  | 5  | 6  | 2  | 7  | 10 |
| C09730 | 9  | 11 | 3  | 5  | 2  | 10 | 4  | 1  | 6  | 8  | 7  |
| C10484 | 10 | 5  | 2  | 11 | 6  | 8  | 3  | 4  | 7  | 1  | 9  |
| C03836 | 3  | 6  | 9  | 4  | 11 | 5  | 1  | 10 | 8  | 2  | 7  |
| C06923 | 10 | 9  | 11 | 6  | 5  | 7  | 4  | 3  | 1  | 8  | 2  |
| C13725 | 6  | 4  | 10 | 5  | 2  | 9  | 11 | 7  | 1  | 3  | 8  |
| C07441 | 5  | 10 | 3  | 2  | 4  | 1  | 11 | 9  | 6  | 8  | 7  |
| C07517 | 11 | 2  | 1  | 10 | 4  | 6  | 5  | 9  | 3  | 7  | 8  |
| C08769 | 9  | 10 | 11 | 8  | 7  | 5  | 3  | 1  | 2  | 6  | 4  |
| C14758 | 3  | 10 | 11 | 8  | 5  | 4  | 9  | 7  | 1  | 6  | 2  |
| C07624 | 4  | 11 | 6  | 1  | 8  | 3  | 9  | 5  | 2  | 7  | 10 |
| C05463 | 3  | 6  | 9  | 10 | 8  | 4  | 7  | 2  | 1  | 11 | 5  |
| C07534 | 3  | 11 | 10 | 5  | 8  | 2  | 9  | 4  | 1  | 6  | 7  |
| C01582 | 1  | 2  | 10 | 5  | 6  | 8  | 3  | 4  | 11 | 9  | 7  |
| C11363 | 3  | 8  | 11 | 6  | 2  | 5  | 1  | 10 | 4  | 9  | 7  |
| C06265 | 1  | 2  | 10 | 11 | 9  | 7  | 4  | 3  | 5  | 6  | 8  |
| C02964 | 1  | 2  | 3  | 5  | 8  | 9  | 6  | 4  | 10 | 11 | 7  |
| C01863 | 2  | 8  | 4  | 6  | 10 | 9  | 1  | 3  | 7  | 5  | 11 |
| C10429 | 9  | 11 | 10 | 5  | 2  | 1  | 8  | 3  | 6  | 7  | 4  |
| C11193 | 10 | 5  | 3  | 1  | 4  | 9  | 11 | 8  | 2  | 6  | 7  |
| C11096 | 3  | 6  | 2  | 11 | 1  | 5  | 7  | 4  | 8  | 9  | 10 |
| C03999 | 6  | 2  | 7  | 9  | 4  | 10 | 8  | 5  | 11 | 1  | 3  |
| C11312 | 1  | 6  | 10 | 11 | 4  | 8  | 2  | 5  | 7  | 9  | 3  |
| C11005 | 11 | 6  | 2  | 10 | 8  | 4  | 1  | 7  | 9  | 5  | 3  |
| C05935 | 5  | 6  | 11 | 10 | 9  | 1  | 2  | 8  | 4  | 7  | 3  |
| C07418 | 5  | 6  | 2  | 8  | 3  | 11 | 1  | 10 | 9  | 4  | 7  |
| C13717 | 1  | 5  | 7  | 4  | 9  | 6  | 3  | 8  | 10 | 11 | 2  |
| C13701 | 6  | 3  | 11 | 10 | 4  | 2  | 9  | 5  | 1  | 7  | 8  |
| C08397 | 3  | 11 | 4  | 10 | 7  | 2  | 1  | 5  | 8  | 9  | 6  |
| C03215 | 2  | 1  | 8  | 7  | 10 | 5  | 6  | 3  | 9  | 11 | 4  |
| C02143 | 1  | 2  | 8  | 5  | 3  | 6  | 10 | 7  | 4  | 11 | 9  |
| C06573 | 1  | 10 | 3  | 9  | 5  | 11 | 2  | 7  | 4  | 6  | 8  |
| C12668 | 10 | 1  | 4  | 9  | 8  | 11 | 3  | 2  | 7  | 5  | 6  |
| C02558 | 11 | 3  | 5  | 8  | 10 | 1  | 6  | 2  | 9  | 7  | 4  |
| C10714 | 1  | 8  | 11 | 7  | 9  | 6  | 3  | 4  | 5  | 2  | 10 |
| C07594 | 9  | 3  | 1  | 5  | 10 | 7  | 8  | 11 | 4  | 2  | 6  |
| C15687 | 11 | 5  | 1  | 9  | 2  | 8  | 6  | 7  | 3  | 10 | 4  |
| C10058 | 10 | 9  | 11 | 5  | 1  | 3  | 6  | 2  | 4  | 7  | 8  |
| C12871 | 2  | 4  | 5  | 1  | 3  | 11 | 6  | 7  | 8  | 10 | 9  |
| C08435 | 9  | 4  | 1  | 10 | 3  | 6  | 7  | 8  | 5  | 2  | 11 |
| C07168 | 10 | 2  | 4  | 3  | 9  | 8  | 1  | 11 | 5  | 6  | 7  |

|        |    |    |    |    |    |    |    |    |    |    |    |
|--------|----|----|----|----|----|----|----|----|----|----|----|
| C09952 | 10 | 5  | 2  | 7  | 9  | 4  | 3  | 1  | 8  | 11 | 6  |
| C10475 | 9  | 10 | 5  | 6  | 4  | 7  | 3  | 2  | 8  | 1  | 11 |
| C15587 | 4  | 2  | 10 | 9  | 5  | 11 | 8  | 1  | 7  | 6  | 3  |
| C06466 | 1  | 2  | 10 | 5  | 6  | 8  | 3  | 4  | 11 | 9  | 7  |
| C07871 | 11 | 10 | 5  | 7  | 4  | 2  | 3  | 1  | 6  | 8  | 9  |
| C09189 | 1  | 10 | 9  | 8  | 5  | 6  | 11 | 3  | 2  | 7  | 4  |
| C08303 | 5  | 10 | 2  | 3  | 9  | 4  | 8  | 11 | 7  | 6  | 1  |
| C06393 | 5  | 11 | 8  | 6  | 2  | 4  | 1  | 9  | 10 | 3  | 7  |
| C06725 | 8  | 2  | 7  | 6  | 3  | 4  | 5  | 10 | 9  | 11 | 1  |
| C09446 | 10 | 8  | 5  | 11 | 6  | 9  | 1  | 4  | 3  | 7  | 2  |
| C01913 | 2  | 8  | 1  | 11 | 5  | 6  | 10 | 4  | 9  | 7  | 3  |
| C09670 | 10 | 2  | 11 | 4  | 9  | 7  | 5  | 6  | 3  | 1  | 8  |
| C06976 | 2  | 10 | 11 | 8  | 5  | 3  | 6  | 4  | 7  | 9  | 1  |
| C00273 | 1  | 2  | 6  | 8  | 3  | 10 | 4  | 5  | 9  | 11 | 7  |
| C14517 | 11 | 10 | 8  | 7  | 6  | 1  | 9  | 4  | 3  | 2  | 5  |
| C09160 | 5  | 9  | 11 | 10 | 7  | 2  | 3  | 1  | 8  | 4  | 6  |
| C06086 | 9  | 2  | 7  | 11 | 1  | 10 | 3  | 6  | 4  | 8  | 5  |
| C09234 | 10 | 2  | 6  | 1  | 3  | 5  | 7  | 8  | 4  | 11 | 9  |
| C11013 | 11 | 8  | 7  | 5  | 3  | 2  | 10 | 1  | 6  | 4  | 9  |
| C01607 | 3  | 1  | 8  | 5  | 9  | 2  | 10 | 11 | 6  | 7  | 4  |
| C09058 | 10 | 11 | 4  | 2  | 7  | 3  | 8  | 5  | 1  | 9  | 6  |
| C11125 | 10 | 11 | 7  | 1  | 3  | 2  | 9  | 4  | 6  | 5  | 8  |
| C05001 | 1  | 11 | 2  | 3  | 8  | 10 | 9  | 4  | 5  | 7  | 6  |
| C08624 | 3  | 9  | 2  | 6  | 8  | 1  | 7  | 5  | 11 | 4  | 10 |
| C05849 | 8  | 2  | 11 | 10 | 5  | 6  | 9  | 1  | 7  | 3  | 4  |
| C07532 | 5  | 11 | 10 | 9  | 2  | 8  | 4  | 3  | 1  | 6  | 7  |
| C08102 | 10 | 11 | 4  | 9  | 1  | 3  | 2  | 6  | 5  | 7  | 8  |
| C12011 | 9  | 5  | 8  | 7  | 4  | 2  | 11 | 3  | 1  | 10 | 6  |
| C08746 | 10 | 3  | 4  | 8  | 7  | 5  | 6  | 11 | 9  | 1  | 2  |
| C02927 | 3  | 8  | 1  | 2  | 5  | 4  | 11 | 9  | 10 | 7  | 6  |
| C10386 | 10 | 9  | 6  | 5  | 7  | 3  | 1  | 2  | 4  | 11 | 8  |
| C01870 | 6  | 2  | 8  | 11 | 1  | 9  | 10 | 4  | 3  | 7  | 5  |
| C14286 | 11 | 1  | 3  | 8  | 5  | 10 | 2  | 7  | 9  | 6  | 4  |
| C02206 | 10 | 9  | 11 | 4  | 8  | 7  | 1  | 3  | 5  | 6  | 2  |
| C07707 | 6  | 10 | 5  | 2  | 8  | 4  | 7  | 3  | 9  | 1  | 11 |
| C07997 | 5  | 6  | 10 | 8  | 9  | 1  | 3  | 11 | 4  | 2  | 7  |
| C16452 | 11 | 10 | 2  | 8  | 5  | 1  | 3  | 9  | 7  | 6  | 4  |
| C14533 | 11 | 5  | 1  | 9  | 2  | 8  | 7  | 10 | 3  | 6  | 4  |
| C03416 | 9  | 2  | 6  | 1  | 7  | 10 | 11 | 8  | 3  | 5  | 4  |
| C10351 | 8  | 9  | 7  | 6  | 1  | 2  | 11 | 3  | 10 | 4  | 5  |
| C13569 | 9  | 6  | 10 | 4  | 11 | 8  | 5  | 1  | 2  | 7  | 3  |
| C14190 | 3  | 11 | 10 | 6  | 8  | 7  | 2  | 9  | 1  | 5  | 4  |
| C03091 | 3  | 6  | 2  | 9  | 8  | 5  | 1  | 10 | 11 | 7  | 4  |

|        |    |    |    |    |    |    |    |    |    |    |    |
|--------|----|----|----|----|----|----|----|----|----|----|----|
| C08951 | 11 | 1  | 7  | 5  | 8  | 9  | 3  | 2  | 10 | 4  | 6  |
| C13908 | 1  | 7  | 3  | 2  | 10 | 5  | 11 | 6  | 9  | 8  | 4  |
| C09875 | 9  | 11 | 5  | 10 | 8  | 7  | 1  | 4  | 3  | 6  | 2  |
| C11015 | 11 | 5  | 1  | 2  | 6  | 10 | 4  | 8  | 9  | 3  | 7  |
| C03352 | 11 | 10 | 5  | 1  | 3  | 4  | 8  | 6  | 2  | 7  | 9  |
| C09152 | 5  | 10 | 11 | 7  | 4  | 2  | 3  | 8  | 1  | 9  | 6  |
| C07278 | 1  | 2  | 5  | 3  | 7  | 6  | 8  | 10 | 9  | 4  | 11 |
| C14588 | 3  | 9  | 1  | 2  | 11 | 4  | 7  | 6  | 8  | 5  | 10 |
| C14475 | 3  | 10 | 2  | 8  | 4  | 9  | 1  | 7  | 11 | 6  | 5  |
| C00771 | 1  | 10 | 5  | 2  | 6  | 11 | 8  | 3  | 7  | 4  | 9  |
| C14423 | 11 | 4  | 5  | 2  | 1  | 9  | 6  | 3  | 10 | 8  | 7  |
| C12075 | 10 | 4  | 7  | 5  | 11 | 6  | 3  | 2  | 9  | 8  | 1  |
| C15626 | 3  | 11 | 8  | 5  | 1  | 10 | 2  | 4  | 6  | 7  | 9  |
| C12286 | 9  | 10 | 11 | 8  | 3  | 7  | 2  | 6  | 5  | 4  | 1  |
| C09687 | 3  | 8  | 10 | 1  | 9  | 11 | 2  | 7  | 5  | 4  | 6  |
| C11644 | 1  | 10 | 11 | 6  | 7  | 5  | 4  | 3  | 9  | 8  | 2  |
| C06269 | 2  | 6  | 11 | 8  | 5  | 1  | 4  | 3  | 7  | 9  | 10 |
| C06896 | 10 | 9  | 5  | 11 | 8  | 4  | 6  | 3  | 1  | 7  | 2  |
| C01576 | 10 | 9  | 11 | 8  | 4  | 2  | 6  | 5  | 1  | 3  | 7  |
| C10499 | 5  | 10 | 9  | 7  | 1  | 11 | 3  | 2  | 6  | 4  | 8  |
| C08250 | 1  | 10 | 3  | 6  | 11 | 2  | 4  | 9  | 5  | 8  | 7  |
| C11800 | 5  | 8  | 6  | 9  | 4  | 10 | 3  | 2  | 11 | 1  | 7  |
| C04126 | 5  | 2  | 8  | 1  | 4  | 6  | 11 | 9  | 3  | 10 | 7  |
| C07626 | 5  | 10 | 9  | 1  | 11 | 8  | 4  | 6  | 3  | 2  | 7  |
| C07761 | 10 | 1  | 9  | 2  | 5  | 7  | 6  | 8  | 11 | 3  | 4  |
| C12888 | 3  | 5  | 11 | 4  | 10 | 6  | 1  | 9  | 2  | 7  | 8  |
| C07294 | 11 | 8  | 6  | 2  | 9  | 10 | 7  | 5  | 3  | 1  | 4  |
| C03246 | 1  | 7  | 8  | 10 | 9  | 4  | 3  | 2  | 6  | 11 | 5  |
| C01485 | 2  | 1  | 8  | 6  | 4  | 5  | 7  | 11 | 9  | 10 | 3  |
| C08569 | 10 | 5  | 8  | 11 | 6  | 1  | 2  | 7  | 4  | 3  | 9  |
| C13703 | 1  | 11 | 2  | 5  | 6  | 9  | 7  | 4  | 10 | 8  | 3  |
| C02095 | 1  | 2  | 5  | 10 | 3  | 6  | 8  | 9  | 4  | 11 | 7  |
| C09755 | 10 | 1  | 5  | 11 | 6  | 3  | 2  | 9  | 8  | 4  | 7  |
| C08404 | 10 | 5  | 2  | 1  | 4  | 9  | 6  | 11 | 3  | 8  | 7  |
| C14332 | 11 | 6  | 8  | 2  | 10 | 7  | 3  | 9  | 1  | 4  | 5  |
| C00766 | 10 | 5  | 8  | 11 | 1  | 6  | 3  | 9  | 2  | 4  | 7  |
| C10415 | 2  | 6  | 10 | 8  | 9  | 7  | 11 | 3  | 1  | 5  | 4  |
| C14744 | 11 | 1  | 5  | 8  | 2  | 3  | 6  | 4  | 7  | 9  | 10 |
| C12027 | 7  | 9  | 1  | 6  | 2  | 8  | 11 | 4  | 10 | 3  | 5  |
| C01619 | 10 | 11 | 3  | 5  | 4  | 6  | 1  | 2  | 7  | 9  | 8  |
| C01776 | 1  | 3  | 9  | 4  | 5  | 7  | 11 | 2  | 10 | 6  | 8  |
| C11271 | 11 | 9  | 1  | 3  | 8  | 2  | 10 | 5  | 6  | 4  | 7  |
| C03037 | 8  | 10 | 2  | 3  | 6  | 4  | 11 | 7  | 9  | 5  | 1  |

|        |    |    |    |    |    |    |    |    |    |    |    |
|--------|----|----|----|----|----|----|----|----|----|----|----|
| C16256 | 10 | 5  | 11 | 1  | 3  | 9  | 6  | 8  | 2  | 7  | 4  |
| C15632 | 3  | 9  | 7  | 5  | 6  | 10 | 2  | 11 | 4  | 1  | 8  |
| C02965 | 1  | 2  | 5  | 8  | 4  | 6  | 3  | 9  | 10 | 7  | 11 |
| C04138 | 2  | 6  | 10 | 5  | 9  | 8  | 4  | 1  | 7  | 3  | 11 |
| C02752 | 5  | 11 | 1  | 10 | 3  | 9  | 8  | 6  | 2  | 7  | 4  |
| C14402 | 11 | 5  | 1  | 10 | 6  | 2  | 8  | 4  | 7  | 9  | 3  |
| C09715 | 3  | 10 | 8  | 2  | 9  | 5  | 11 | 4  | 6  | 7  | 1  |
| C14250 | 11 | 5  | 6  | 10 | 3  | 8  | 4  | 2  | 7  | 1  | 9  |
| C10871 | 10 | 9  | 8  | 2  | 6  | 11 | 3  | 1  | 5  | 4  | 7  |
| C08329 | 1  | 6  | 10 | 4  | 5  | 7  | 9  | 11 | 3  | 2  | 8  |
| C07246 | 5  | 10 | 11 | 4  | 8  | 3  | 2  | 7  | 9  | 1  | 6  |
| C08549 | 10 | 8  | 5  | 9  | 2  | 11 | 3  | 1  | 6  | 7  | 4  |
| C10926 | 11 | 6  | 5  | 10 | 8  | 1  | 3  | 4  | 9  | 2  | 7  |
| C04794 | 2  | 5  | 4  | 8  | 9  | 1  | 6  | 3  | 11 | 7  | 10 |
| C10868 | 10 | 2  | 9  | 5  | 6  | 7  | 4  | 1  | 11 | 3  | 8  |
| C07549 | 2  | 5  | 9  | 6  | 1  | 4  | 10 | 3  | 8  | 7  | 11 |
| C06874 | 10 | 5  | 1  | 3  | 2  | 4  | 6  | 7  | 11 | 8  | 9  |
| C08950 | 9  | 4  | 1  | 3  | 10 | 8  | 2  | 11 | 7  | 6  | 5  |
| C03748 | 3  | 8  | 7  | 9  | 5  | 1  | 11 | 6  | 2  | 4  | 10 |
| C10787 | 11 | 10 | 5  | 2  | 8  | 9  | 4  | 6  | 7  | 3  | 1  |
| C08374 | 11 | 8  | 9  | 2  | 3  | 7  | 1  | 5  | 10 | 6  | 4  |
| C12080 | 1  | 9  | 3  | 11 | 2  | 6  | 5  | 7  | 4  | 8  | 10 |
| C07430 | 5  | 11 | 10 | 6  | 1  | 7  | 8  | 9  | 4  | 2  | 3  |
| C06812 | 9  | 10 | 1  | 6  | 5  | 8  | 7  | 11 | 4  | 3  | 2  |
| C08088 | 6  | 11 | 1  | 5  | 4  | 9  | 3  | 8  | 2  | 10 | 7  |
| C08067 | 6  | 5  | 8  | 9  | 11 | 2  | 1  | 10 | 3  | 4  | 7  |
| C14572 | 11 | 5  | 9  | 2  | 4  | 1  | 6  | 7  | 3  | 8  | 10 |
| C02944 | 3  | 7  | 2  | 10 | 8  | 5  | 1  | 11 | 4  | 6  | 9  |
| C09734 | 10 | 11 | 5  | 8  | 1  | 7  | 6  | 9  | 3  | 2  | 4  |
| C14455 | 11 | 2  | 8  | 5  | 9  | 7  | 4  | 3  | 6  | 1  | 10 |
| C02587 | 8  | 6  | 5  | 4  | 7  | 11 | 10 | 1  | 3  | 2  | 9  |
| C07280 | 9  | 11 | 10 | 5  | 8  | 6  | 4  | 1  | 3  | 7  | 2  |
| C13732 | 1  | 6  | 5  | 10 | 8  | 2  | 3  | 11 | 9  | 7  | 4  |
| C13503 | 1  | 8  | 6  | 2  | 11 | 10 | 5  | 3  | 4  | 9  | 7  |
| C01936 | 1  | 2  | 8  | 9  | 10 | 11 | 7  | 6  | 5  | 3  | 4  |
| C07709 | 1  | 5  | 3  | 11 | 4  | 6  | 9  | 8  | 2  | 7  | 10 |
| C05765 | 2  | 6  | 4  | 8  | 10 | 9  | 5  | 1  | 3  | 11 | 7  |
| C14126 | 5  | 6  | 8  | 10 | 1  | 2  | 11 | 7  | 9  | 4  | 3  |
| C12083 | 3  | 1  | 8  | 5  | 9  | 2  | 11 | 4  | 10 | 7  | 6  |
| C11739 | 5  | 10 | 11 | 6  | 4  | 7  | 8  | 3  | 9  | 2  | 1  |
| C14301 | 11 | 9  | 10 | 7  | 8  | 6  | 4  | 3  | 2  | 5  | 1  |
| C12153 | 10 | 9  | 5  | 1  | 3  | 11 | 6  | 8  | 7  | 2  | 4  |
| C04084 | 2  | 8  | 1  | 9  | 6  | 4  | 7  | 10 | 3  | 11 | 5  |

|        |    |    |    |    |    |    |    |    |    |    |    |
|--------|----|----|----|----|----|----|----|----|----|----|----|
| C16293 | 10 | 5  | 11 | 4  | 1  | 7  | 9  | 3  | 6  | 8  | 2  |
| C14215 | 11 | 8  | 1  | 5  | 2  | 9  | 4  | 6  | 10 | 7  | 3  |
| C12609 | 10 | 1  | 9  | 7  | 6  | 4  | 11 | 5  | 2  | 8  | 3  |
| C00919 | 2  | 5  | 4  | 7  | 8  | 3  | 6  | 10 | 1  | 9  | 11 |
| C14741 | 11 | 10 | 8  | 6  | 5  | 2  | 3  | 7  | 1  | 4  | 9  |
| C02807 | 11 | 2  | 6  | 8  | 4  | 5  | 1  | 3  | 10 | 7  | 9  |
| C08019 | 10 | 11 | 1  | 5  | 4  | 9  | 8  | 7  | 3  | 6  | 2  |
| C09803 | 10 | 1  | 3  | 4  | 8  | 5  | 2  | 9  | 11 | 7  | 6  |
| C02793 | 8  | 10 | 2  | 1  | 3  | 6  | 5  | 7  | 11 | 4  | 9  |
| C08022 | 10 | 11 | 5  | 1  | 2  | 3  | 4  | 6  | 7  | 8  | 9  |
| C07266 | 10 | 3  | 5  | 1  | 2  | 6  | 4  | 9  | 11 | 8  | 7  |
| C02932 | 9  | 2  | 11 | 8  | 6  | 5  | 10 | 4  | 3  | 1  | 7  |
| C13667 | 5  | 6  | 8  | 10 | 11 | 1  | 2  | 3  | 9  | 7  | 4  |
| C10373 | 11 | 8  | 9  | 1  | 4  | 10 | 3  | 7  | 5  | 2  | 6  |
| C02952 | 2  | 8  | 9  | 4  | 10 | 3  | 5  | 11 | 6  | 1  | 7  |
| C09959 | 10 | 1  | 5  | 11 | 9  | 2  | 3  | 6  | 4  | 7  | 8  |
| C06476 | 3  | 11 | 4  | 7  | 10 | 1  | 8  | 5  | 2  | 9  | 6  |
| C09128 | 9  | 8  | 10 | 3  | 6  | 1  | 7  | 11 | 5  | 2  | 4  |
| C10881 | 1  | 9  | 10 | 11 | 5  | 2  | 7  | 8  | 3  | 6  | 4  |
| C13797 | 1  | 6  | 5  | 4  | 8  | 10 | 9  | 7  | 2  | 3  | 11 |
| C11733 | 1  | 10 | 2  | 3  | 5  | 7  | 8  | 4  | 6  | 11 | 9  |
| C12242 | 10 | 5  | 11 | 1  | 9  | 7  | 3  | 4  | 6  | 8  | 2  |
| C15007 | 4  | 2  | 7  | 3  | 10 | 9  | 1  | 11 | 6  | 8  | 5  |
| C01526 | 2  | 5  | 8  | 6  | 4  | 10 | 1  | 3  | 9  | 11 | 7  |
| C13815 | 2  | 11 | 4  | 6  | 5  | 8  | 10 | 1  | 7  | 3  | 9  |
| C02886 | 5  | 3  | 1  | 6  | 4  | 2  | 11 | 10 | 9  | 8  | 7  |
| C11284 | 5  | 9  | 1  | 10 | 2  | 3  | 11 | 4  | 8  | 7  | 6  |
| C02180 | 11 | 5  | 2  | 4  | 8  | 7  | 10 | 6  | 3  | 9  | 1  |
| C14649 | 3  | 11 | 10 | 4  | 9  | 1  | 8  | 5  | 6  | 7  | 2  |
| C10414 | 10 | 3  | 1  | 5  | 9  | 6  | 8  | 11 | 2  | 4  | 7  |
| C00495 | 8  | 2  | 11 | 5  | 3  | 7  | 10 | 1  | 9  | 6  | 4  |
| C09072 | 8  | 5  | 4  | 10 | 2  | 11 | 3  | 6  | 1  | 9  | 7  |
| C13102 | 9  | 2  | 5  | 11 | 4  | 10 | 8  | 3  | 6  | 1  | 7  |
| C09427 | 10 | 9  | 4  | 2  | 5  | 6  | 1  | 7  | 3  | 8  | 11 |
| C12316 | 10 | 8  | 2  | 5  | 6  | 1  | 11 | 4  | 3  | 9  | 7  |
| C00869 | 2  | 8  | 1  | 5  | 11 | 4  | 6  | 9  | 3  | 10 | 7  |
| C01933 | 5  | 6  | 10 | 1  | 8  | 2  | 4  | 7  | 9  | 3  | 11 |
| C08440 | 6  | 5  | 2  | 4  | 3  | 7  | 10 | 11 | 1  | 9  | 8  |
| C08879 | 5  | 11 | 3  | 10 | 6  | 4  | 8  | 1  | 7  | 2  | 9  |
| C01971 | 1  | 2  | 3  | 5  | 8  | 9  | 6  | 4  | 10 | 11 | 7  |
| C10411 | 10 | 8  | 4  | 7  | 6  | 1  | 9  | 5  | 3  | 11 | 2  |
| C03542 | 2  | 8  | 11 | 5  | 6  | 9  | 4  | 7  | 1  | 3  | 10 |
| C07670 | 1  | 5  | 11 | 10 | 4  | 2  | 9  | 8  | 7  | 3  | 6  |

|        |    |    |    |    |    |    |    |    |    |    |    |
|--------|----|----|----|----|----|----|----|----|----|----|----|
| C11546 | 2  | 8  | 7  | 1  | 6  | 3  | 5  | 9  | 11 | 4  | 10 |
| C01489 | 1  | 2  | 5  | 8  | 6  | 10 | 3  | 11 | 9  | 4  | 7  |
| C02181 | 11 | 5  | 10 | 6  | 1  | 7  | 9  | 2  | 8  | 3  | 4  |
| C04547 | 2  | 8  | 11 | 5  | 1  | 9  | 6  | 3  | 10 | 4  | 7  |
| C14559 | 11 | 4  | 9  | 6  | 1  | 5  | 7  | 3  | 2  | 10 | 8  |
| C13731 | 6  | 1  | 8  | 5  | 11 | 10 | 2  | 9  | 3  | 4  | 7  |
| C07159 | 2  | 8  | 9  | 6  | 4  | 10 | 3  | 1  | 5  | 11 | 7  |
| C10425 | 10 | 11 | 1  | 9  | 8  | 5  | 4  | 2  | 7  | 3  | 6  |
| C07149 | 1  | 9  | 10 | 5  | 11 | 3  | 8  | 7  | 2  | 6  | 4  |
| C06372 | 1  | 2  | 5  | 3  | 7  | 8  | 6  | 10 | 9  | 4  | 11 |
| C14412 | 11 | 5  | 2  | 1  | 6  | 10 | 4  | 7  | 3  | 8  | 9  |
| C12525 | 3  | 2  | 8  | 6  | 5  | 1  | 4  | 10 | 7  | 11 | 9  |
| C01458 | 5  | 9  | 8  | 10 | 6  | 11 | 3  | 2  | 7  | 1  | 4  |
| C06865 | 3  | 1  | 11 | 4  | 7  | 2  | 9  | 5  | 6  | 8  | 10 |
| C12300 | 9  | 11 | 5  | 3  | 4  | 2  | 1  | 6  | 10 | 8  | 7  |
| C14247 | 11 | 5  | 9  | 8  | 3  | 10 | 7  | 2  | 4  | 1  | 6  |
| C04540 | 1  | 2  | 5  | 6  | 8  | 11 | 10 | 3  | 9  | 7  | 4  |
| C08195 | 3  | 1  | 5  | 10 | 11 | 2  | 4  | 9  | 8  | 7  | 6  |
| C12675 | 3  | 2  | 8  | 10 | 6  | 4  | 11 | 9  | 7  | 5  | 1  |
| C09702 | 9  | 10 | 3  | 11 | 7  | 5  | 2  | 1  | 4  | 8  | 6  |
| C06537 | 11 | 4  | 1  | 5  | 2  | 8  | 10 | 7  | 9  | 6  | 3  |
| C04081 | 11 | 5  | 8  | 2  | 4  | 6  | 3  | 1  | 9  | 7  | 10 |
| C11178 | 6  | 11 | 10 | 8  | 2  | 5  | 1  | 9  | 7  | 3  | 4  |
| C04274 | 11 | 1  | 5  | 6  | 8  | 10 | 9  | 2  | 7  | 3  | 4  |
| C06784 | 1  | 6  | 5  | 2  | 8  | 7  | 10 | 3  | 9  | 4  | 11 |
| C04834 | 2  | 8  | 10 | 11 | 9  | 5  | 3  | 7  | 6  | 4  | 1  |
| C03964 | 5  | 8  | 10 | 2  | 9  | 4  | 1  | 11 | 3  | 6  | 7  |
| C02168 | 3  | 11 | 10 | 5  | 9  | 1  | 7  | 2  | 4  | 8  | 6  |
| C01014 | 11 | 2  | 7  | 9  | 5  | 4  | 3  | 8  | 1  | 10 | 6  |
| C09215 | 10 | 5  | 9  | 8  | 4  | 3  | 11 | 6  | 2  | 1  | 7  |
| C07760 | 5  | 1  | 6  | 11 | 9  | 3  | 7  | 2  | 8  | 10 | 4  |
| C10559 | 10 | 3  | 9  | 1  | 5  | 2  | 11 | 7  | 4  | 8  | 6  |
| C03776 | 1  | 8  | 3  | 10 | 2  | 5  | 11 | 4  | 6  | 9  | 7  |
| C01631 | 10 | 9  | 11 | 2  | 1  | 4  | 6  | 3  | 7  | 8  | 5  |
| C05416 | 3  | 9  | 5  | 4  | 2  | 8  | 11 | 10 | 1  | 6  | 7  |
| C07288 | 9  | 2  | 11 | 8  | 5  | 3  | 6  | 10 | 4  | 1  | 7  |
| C00324 | 2  | 8  | 1  | 11 | 5  | 6  | 10 | 4  | 9  | 7  | 3  |
| C08587 | 9  | 8  | 3  | 6  | 7  | 4  | 1  | 11 | 10 | 5  | 2  |
| C07296 | 3  | 5  | 1  | 6  | 8  | 9  | 10 | 7  | 4  | 11 | 2  |
| C08490 | 9  | 3  | 11 | 10 | 5  | 8  | 2  | 1  | 6  | 7  | 4  |
| C11707 | 5  | 10 | 8  | 1  | 2  | 9  | 4  | 3  | 6  | 11 | 7  |
| C11652 | 1  | 9  | 3  | 10 | 6  | 4  | 11 | 8  | 2  | 7  | 5  |
| C03703 | 4  | 8  | 5  | 2  | 11 | 7  | 3  | 9  | 10 | 6  | 1  |

|        |    |    |    |    |    |    |    |    |    |    |    |
|--------|----|----|----|----|----|----|----|----|----|----|----|
| C11600 | 2  | 6  | 1  | 7  | 3  | 5  | 9  | 10 | 4  | 8  | 11 |
| C13963 | 9  | 3  | 1  | 8  | 7  | 2  | 5  | 6  | 10 | 11 | 4  |
| C10664 | 11 | 10 | 5  | 1  | 6  | 8  | 9  | 3  | 7  | 2  | 4  |
| C12284 | 1  | 5  | 10 | 11 | 8  | 6  | 3  | 2  | 9  | 7  | 4  |
| C04404 | 2  | 8  | 11 | 4  | 7  | 5  | 10 | 3  | 9  | 6  | 1  |
| C11775 | 5  | 10 | 9  | 6  | 8  | 3  | 2  | 1  | 11 | 4  | 7  |
| C01536 | 5  | 6  | 8  | 10 | 2  | 1  | 11 | 4  | 9  | 3  | 7  |
| C06153 | 1  | 8  | 3  | 2  | 5  | 4  | 10 | 9  | 6  | 11 | 7  |
| C08387 | 10 | 3  | 1  | 2  | 9  | 4  | 5  | 8  | 6  | 11 | 7  |
| C14715 | 11 | 5  | 1  | 3  | 2  | 10 | 4  | 7  | 6  | 8  | 9  |
| C07469 | 1  | 3  | 5  | 4  | 10 | 2  | 6  | 7  | 9  | 11 | 8  |
| C15019 | 10 | 8  | 6  | 5  | 4  | 1  | 3  | 11 | 7  | 2  | 9  |
| C15403 | 3  | 8  | 4  | 5  | 1  | 7  | 11 | 9  | 6  | 2  | 10 |
| C11369 | 1  | 10 | 2  | 6  | 8  | 9  | 5  | 4  | 3  | 11 | 7  |
| C03716 | 2  | 1  | 8  | 5  | 11 | 10 | 9  | 3  | 7  | 6  | 4  |
| C09619 | 10 | 9  | 7  | 5  | 1  | 4  | 3  | 8  | 6  | 2  | 11 |
| C07634 | 9  | 11 | 5  | 10 | 2  | 1  | 6  | 7  | 8  | 3  | 4  |
| C08291 | 6  | 5  | 2  | 8  | 1  | 10 | 9  | 4  | 3  | 11 | 7  |
| C02060 | 5  | 2  | 8  | 1  | 9  | 4  | 6  | 3  | 11 | 10 | 7  |
| C11792 | 11 | 10 | 5  | 6  | 9  | 2  | 8  | 7  | 3  | 1  | 4  |
| C04399 | 2  | 7  | 8  | 9  | 6  | 11 | 10 | 5  | 3  | 4  | 1  |
| C03738 | 6  | 5  | 2  | 4  | 8  | 7  | 1  | 9  | 10 | 3  | 11 |
| C01700 | 3  | 1  | 10 | 5  | 6  | 8  | 7  | 11 | 4  | 9  | 2  |
| C09098 | 10 | 5  | 3  | 9  | 1  | 11 | 4  | 8  | 6  | 2  | 7  |
| C14155 | 9  | 8  | 3  | 5  | 2  | 10 | 1  | 4  | 11 | 6  | 7  |
| C03264 | 5  | 10 | 3  | 8  | 1  | 9  | 2  | 4  | 7  | 6  | 11 |
| C07070 | 11 | 10 | 9  | 5  | 4  | 8  | 2  | 3  | 1  | 6  | 7  |
| C15417 | 3  | 5  | 6  | 1  | 2  | 4  | 7  | 11 | 10 | 8  | 9  |
| C06950 | 10 | 9  | 5  | 11 | 2  | 8  | 3  | 1  | 6  | 4  | 7  |
| C08344 | 6  | 11 | 2  | 5  | 4  | 8  | 10 | 7  | 3  | 1  | 9  |
| C13403 | 5  | 11 | 7  | 3  | 9  | 1  | 10 | 6  | 2  | 8  | 4  |
| C10934 | 11 | 2  | 1  | 5  | 9  | 8  | 7  | 6  | 4  | 10 | 3  |
| C15291 | 3  | 1  | 11 | 8  | 4  | 9  | 5  | 2  | 6  | 7  | 10 |
| C11332 | 5  | 10 | 6  | 2  | 8  | 1  | 4  | 11 | 3  | 7  | 9  |
| C12307 | 9  | 11 | 1  | 5  | 3  | 8  | 2  | 6  | 10 | 7  | 4  |
| C01719 | 1  | 2  | 8  | 9  | 4  | 10 | 6  | 5  | 7  | 3  | 11 |
| C12554 | 6  | 1  | 5  | 2  | 8  | 11 | 10 | 9  | 7  | 4  | 3  |
| C10176 | 10 | 11 | 1  | 5  | 2  | 9  | 6  | 3  | 4  | 8  | 7  |
| C14386 | 11 | 9  | 5  | 8  | 7  | 1  | 4  | 2  | 3  | 10 | 6  |
| C11511 | 5  | 2  | 6  | 8  | 4  | 1  | 11 | 10 | 3  | 9  | 7  |
| C08760 | 10 | 9  | 6  | 1  | 4  | 5  | 3  | 7  | 11 | 8  | 2  |
| C02724 | 5  | 9  | 8  | 6  | 2  | 4  | 10 | 11 | 7  | 3  | 1  |
| C16455 | 5  | 11 | 7  | 4  | 9  | 3  | 1  | 10 | 6  | 8  | 2  |

|        |    |    |    |    |    |    |    |    |    |    |    |
|--------|----|----|----|----|----|----|----|----|----|----|----|
| C10118 | 10 | 11 | 5  | 9  | 8  | 7  | 2  | 4  | 1  | 3  | 6  |
| C10160 | 10 | 8  | 3  | 1  | 2  | 7  | 6  | 9  | 11 | 5  | 4  |
| C13692 | 5  | 10 | 6  | 11 | 8  | 1  | 3  | 2  | 4  | 7  | 9  |
| C07456 | 10 | 2  | 3  | 5  | 6  | 4  | 9  | 8  | 1  | 7  | 11 |
| C10844 | 10 | 8  | 11 | 1  | 2  | 3  | 5  | 4  | 6  | 9  | 7  |
| C11326 | 5  | 3  | 11 | 1  | 9  | 2  | 7  | 6  | 4  | 8  | 10 |
| C06886 | 10 | 9  | 8  | 6  | 5  | 11 | 3  | 7  | 1  | 2  | 4  |
| C08384 | 10 | 3  | 9  | 11 | 5  | 1  | 8  | 2  | 4  | 6  | 7  |
| C12036 | 7  | 6  | 2  | 11 | 10 | 9  | 4  | 8  | 3  | 1  | 5  |
| C01712 | 3  | 1  | 2  | 8  | 5  | 9  | 6  | 11 | 10 | 4  | 7  |
| C12278 | 1  | 3  | 11 | 10 | 5  | 6  | 9  | 8  | 4  | 7  | 2  |
| C10991 | 11 | 6  | 10 | 9  | 1  | 2  | 5  | 3  | 4  | 7  | 8  |
| C07141 | 10 | 3  | 5  | 1  | 8  | 6  | 9  | 2  | 4  | 11 | 7  |
| C12691 | 10 | 9  | 8  | 1  | 2  | 6  | 3  | 7  | 11 | 5  | 4  |
| C01755 | 1  | 2  | 5  | 6  | 11 | 8  | 10 | 3  | 4  | 9  | 7  |
| C15553 | 3  | 5  | 10 | 2  | 1  | 4  | 7  | 11 | 8  | 9  | 6  |
| C13426 | 3  | 11 | 5  | 8  | 6  | 4  | 7  | 2  | 1  | 9  | 10 |
| C04441 | 5  | 9  | 10 | 1  | 7  | 3  | 8  | 2  | 11 | 4  | 6  |
| C07654 | 9  | 1  | 10 | 11 | 6  | 8  | 4  | 7  | 5  | 3  | 2  |
| C07763 | 11 | 8  | 7  | 4  | 3  | 1  | 2  | 10 | 5  | 9  | 6  |
| C08241 | 1  | 10 | 7  | 3  | 9  | 2  | 5  | 8  | 6  | 4  | 11 |
| C13750 | 10 | 2  | 5  | 9  | 11 | 1  | 4  | 6  | 3  | 7  | 8  |
| C01464 | 1  | 11 | 9  | 2  | 10 | 8  | 6  | 7  | 3  | 5  | 4  |
| C08964 | 1  | 4  | 9  | 3  | 5  | 6  | 7  | 10 | 2  | 8  | 11 |
| C14445 | 11 | 10 | 6  | 9  | 7  | 8  | 3  | 2  | 5  | 4  | 1  |
| C14348 | 11 | 3  | 5  | 2  | 4  | 6  | 8  | 10 | 1  | 9  | 7  |
| C10333 | 10 | 1  | 11 | 7  | 4  | 3  | 9  | 2  | 5  | 8  | 6  |
| C15412 | 3  | 4  | 5  | 10 | 8  | 9  | 6  | 1  | 11 | 7  | 2  |
| C12490 | 6  | 5  | 8  | 9  | 11 | 1  | 2  | 10 | 3  | 4  | 7  |
| C10898 | 8  | 3  | 2  | 5  | 7  | 6  | 11 | 4  | 10 | 1  | 9  |
| C14433 | 11 | 10 | 2  | 9  | 4  | 6  | 1  | 7  | 5  | 3  | 8  |
| C12308 | 9  | 8  | 5  | 1  | 6  | 11 | 2  | 4  | 3  | 7  | 10 |
| C06617 | 9  | 10 | 6  | 1  | 11 | 4  | 3  | 7  | 2  | 5  | 8  |
| C08348 | 1  | 2  | 11 | 3  | 8  | 9  | 4  | 5  | 10 | 6  | 7  |
| C08897 | 3  | 10 | 2  | 1  | 9  | 7  | 6  | 5  | 11 | 4  | 8  |
| C00282 | 5  | 1  | 10 | 11 | 8  | 9  | 3  | 2  | 4  | 6  | 7  |
| C14358 | 11 | 4  | 5  | 2  | 8  | 7  | 3  | 9  | 6  | 10 | 1  |
| C11063 | 11 | 8  | 10 | 5  | 3  | 6  | 9  | 2  | 4  | 7  | 1  |
| C08115 | 10 | 9  | 11 | 8  | 2  | 4  | 3  | 6  | 1  | 7  | 5  |
| C07933 | 10 | 1  | 5  | 6  | 2  | 4  | 8  | 11 | 9  | 3  | 7  |
| C08260 | 1  | 2  | 8  | 7  | 5  | 6  | 4  | 11 | 9  | 3  | 10 |
| C00703 | 1  | 2  | 5  | 9  | 8  | 6  | 11 | 10 | 4  | 3  | 7  |
| C13737 | 5  | 6  | 10 | 1  | 8  | 2  | 11 | 3  | 4  | 9  | 7  |



|        |    |    |    |    |    |    |    |    |    |    |    |
|--------|----|----|----|----|----|----|----|----|----|----|----|
| C09719 | 9  | 5  | 11 | 10 | 6  | 2  | 7  | 3  | 8  | 4  | 1  |
| C08267 | 5  | 6  | 10 | 1  | 8  | 2  | 9  | 4  | 11 | 3  | 7  |
| C10166 | 10 | 3  | 2  | 7  | 6  | 9  | 8  | 11 | 5  | 4  | 1  |
| C07622 | 11 | 3  | 1  | 9  | 5  | 10 | 4  | 8  | 6  | 7  | 2  |
| C14656 | 4  | 6  | 5  | 8  | 10 | 9  | 3  | 2  | 1  | 11 | 7  |
| C10448 | 1  | 9  | 4  | 10 | 3  | 11 | 5  | 2  | 8  | 6  | 7  |
| C07486 | 11 | 6  | 8  | 10 | 2  | 5  | 1  | 3  | 7  | 4  | 9  |
| C01826 | 5  | 6  | 8  | 10 | 2  | 1  | 4  | 7  | 9  | 3  | 11 |
| C01876 | 3  | 11 | 9  | 6  | 10 | 7  | 5  | 1  | 2  | 4  | 8  |
| C02289 | 9  | 2  | 8  | 6  | 11 | 10 | 7  | 3  | 4  | 5  | 1  |
| C03368 | 10 | 9  | 5  | 7  | 3  | 8  | 1  | 2  | 4  | 6  | 11 |
| C15274 | 1  | 5  | 10 | 7  | 8  | 4  | 3  | 2  | 6  | 11 | 9  |
| C09137 | 9  | 4  | 5  | 8  | 6  | 3  | 2  | 11 | 10 | 7  | 1  |
| C09165 | 10 | 6  | 8  | 4  | 11 | 7  | 1  | 3  | 9  | 2  | 5  |
| C14253 | 1  | 11 | 10 | 3  | 9  | 7  | 6  | 4  | 5  | 2  | 8  |
| C07174 | 10 | 5  | 1  | 6  | 2  | 8  | 3  | 9  | 11 | 4  | 7  |
| C10111 | 10 | 9  | 7  | 11 | 5  | 8  | 6  | 1  | 3  | 4  | 2  |
| C14507 | 11 | 5  | 2  | 6  | 9  | 7  | 3  | 4  | 8  | 10 | 1  |
| C07887 | 10 | 5  | 11 | 1  | 2  | 9  | 4  | 7  | 6  | 3  | 8  |
| C09664 | 9  | 11 | 10 | 3  | 6  | 2  | 7  | 8  | 1  | 4  | 5  |
| C12915 | 10 | 5  | 11 | 4  | 6  | 2  | 3  | 9  | 1  | 7  | 8  |
| C00941 | 4  | 2  | 9  | 10 | 7  | 8  | 3  | 6  | 1  | 11 | 5  |
| C09147 | 10 | 11 | 9  | 5  | 6  | 3  | 2  | 1  | 8  | 7  | 4  |
| C05148 | 11 | 5  | 8  | 10 | 3  | 6  | 9  | 4  | 1  | 2  | 7  |
| C00770 | 1  | 2  | 8  | 5  | 6  | 11 | 9  | 4  | 3  | 10 | 7  |
| C02299 | 11 | 2  | 7  | 6  | 5  | 3  | 4  | 10 | 9  | 1  | 8  |
| C11371 | 3  | 11 | 6  | 5  | 8  | 7  | 10 | 4  | 1  | 9  | 2  |
| C15928 | 9  | 1  | 8  | 7  | 2  | 6  | 3  | 11 | 10 | 5  | 4  |
| C14417 | 11 | 10 | 5  | 3  | 1  | 8  | 4  | 9  | 2  | 7  | 6  |
| C00291 | 1  | 2  | 5  | 8  | 6  | 11 | 4  | 3  | 10 | 9  | 7  |
| C05031 | 4  | 1  | 11 | 2  | 3  | 7  | 6  | 8  | 9  | 5  | 10 |
| C06949 | 1  | 10 | 5  | 2  | 6  | 4  | 8  | 3  | 9  | 11 | 7  |
| C02615 | 1  | 6  | 11 | 2  | 5  | 9  | 10 | 8  | 4  | 3  | 7  |
| C08859 | 10 | 5  | 2  | 1  | 8  | 6  | 9  | 4  | 11 | 7  | 3  |
| C07034 | 5  | 10 | 2  | 1  | 3  | 11 | 7  | 6  | 9  | 4  | 8  |
| C07218 | 5  | 10 | 4  | 11 | 6  | 2  | 3  | 1  | 8  | 9  | 7  |
| C01588 | 1  | 3  | 2  | 10 | 5  | 8  | 11 | 9  | 4  | 7  | 6  |
| C10038 | 10 | 11 | 5  | 2  | 6  | 9  | 7  | 8  | 3  | 1  | 4  |
| C07408 | 5  | 10 | 11 | 9  | 4  | 6  | 2  | 8  | 3  | 1  | 7  |
| C00961 | 9  | 11 | 4  | 2  | 10 | 7  | 1  | 5  | 8  | 3  | 6  |
| C07270 | 10 | 5  | 3  | 8  | 7  | 1  | 4  | 6  | 11 | 2  | 9  |
| C08692 | 9  | 11 | 7  | 5  | 10 | 4  | 3  | 8  | 2  | 1  | 6  |
| C10330 | 10 | 1  | 9  | 8  | 2  | 11 | 4  | 6  | 3  | 7  | 5  |

|        |    |    |    |    |    |    |    |    |    |    |    |
|--------|----|----|----|----|----|----|----|----|----|----|----|
| C14146 | 9  | 8  | 4  | 5  | 1  | 11 | 3  | 10 | 7  | 2  | 6  |
| C09682 | 9  | 10 | 8  | 4  | 11 | 1  | 6  | 3  | 2  | 5  | 7  |
| C08448 | 11 | 5  | 10 | 8  | 2  | 9  | 6  | 3  | 1  | 7  | 4  |
| C10214 | 11 | 10 | 1  | 9  | 4  | 6  | 7  | 3  | 2  | 8  | 5  |
| C10558 | 11 | 10 | 5  | 3  | 2  | 4  | 6  | 8  | 7  | 1  | 9  |
| C12270 | 5  | 10 | 6  | 1  | 2  | 8  | 3  | 11 | 9  | 4  | 7  |
| C01432 | 1  | 5  | 2  | 6  | 8  | 3  | 11 | 4  | 10 | 9  | 7  |
| C12243 | 10 | 2  | 11 | 9  | 6  | 7  | 1  | 3  | 8  | 5  | 4  |
| C06978 | 10 | 11 | 1  | 8  | 4  | 2  | 5  | 3  | 6  | 7  | 9  |
| C06996 | 5  | 10 | 3  | 11 | 2  | 8  | 7  | 1  | 6  | 4  | 9  |
| C08917 | 1  | 10 | 11 | 3  | 2  | 6  | 8  | 9  | 5  | 4  | 7  |
| C10426 | 11 | 2  | 5  | 10 | 6  | 7  | 1  | 9  | 3  | 8  | 4  |
| C04865 | 2  | 8  | 5  | 4  | 1  | 10 | 7  | 6  | 3  | 11 | 9  |
| C09698 | 9  | 10 | 11 | 3  | 7  | 4  | 2  | 1  | 5  | 6  | 8  |
| C14498 | 3  | 2  | 5  | 4  | 8  | 1  | 6  | 11 | 10 | 7  | 9  |
| C08533 | 10 | 11 | 9  | 2  | 4  | 1  | 8  | 7  | 3  | 6  | 5  |
| C14320 | 11 | 10 | 2  | 9  | 8  | 1  | 3  | 5  | 7  | 6  | 4  |
| C06369 | 1  | 10 | 2  | 8  | 5  | 6  | 9  | 11 | 7  | 4  | 3  |
| C08378 | 8  | 5  | 10 | 3  | 11 | 4  | 6  | 1  | 7  | 9  | 2  |
| C09141 | 10 | 2  | 3  | 9  | 5  | 6  | 11 | 8  | 1  | 7  | 4  |
| C03626 | 5  | 2  | 6  | 8  | 3  | 11 | 4  | 9  | 10 | 1  | 7  |
| C08373 | 11 | 5  | 8  | 7  | 4  | 1  | 2  | 9  | 3  | 6  | 10 |
| C12154 | 10 | 1  | 9  | 3  | 11 | 8  | 7  | 5  | 2  | 4  | 6  |
| C12222 | 10 | 11 | 4  | 1  | 2  | 8  | 3  | 7  | 6  | 9  | 5  |
| C02961 | 4  | 1  | 2  | 9  | 10 | 8  | 11 | 5  | 6  | 7  | 3  |
| C06468 | 1  | 2  | 5  | 6  | 8  | 3  | 10 | 11 | 9  | 4  | 7  |
| C02205 | 1  | 2  | 8  | 5  | 4  | 6  | 11 | 10 | 9  | 7  | 3  |
| C02466 | 2  | 1  | 4  | 7  | 5  | 11 | 8  | 3  | 10 | 6  | 9  |
| C11294 | 1  | 10 | 11 | 9  | 4  | 8  | 6  | 2  | 3  | 5  | 7  |
| C11031 | 4  | 11 | 1  | 10 | 2  | 3  | 5  | 8  | 9  | 6  | 7  |
| C08668 | 9  | 6  | 1  | 3  | 2  | 10 | 11 | 7  | 5  | 4  | 8  |
| C01048 | 1  | 9  | 7  | 4  | 10 | 2  | 8  | 3  | 5  | 11 | 6  |
| C04798 | 2  | 8  | 5  | 7  | 4  | 9  | 10 | 3  | 11 | 1  | 6  |
| C14435 | 11 | 4  | 10 | 2  | 6  | 5  | 7  | 8  | 3  | 9  | 1  |
| C10240 | 11 | 4  | 10 | 5  | 1  | 3  | 6  | 7  | 2  | 8  | 9  |
| C02135 | 3  | 5  | 1  | 2  | 6  | 10 | 4  | 8  | 9  | 11 | 7  |
| C11302 | 3  | 1  | 6  | 8  | 5  | 2  | 4  | 11 | 10 | 7  | 9  |
| C07512 | 10 | 5  | 2  | 4  | 6  | 1  | 3  | 8  | 9  | 7  | 11 |
| C03499 | 5  | 8  | 1  | 11 | 3  | 4  | 9  | 7  | 6  | 10 | 2  |
| C06956 | 10 | 5  | 3  | 6  | 2  | 8  | 9  | 11 | 4  | 7  | 1  |
| C06820 | 10 | 9  | 5  | 1  | 11 | 4  | 6  | 7  | 2  | 3  | 8  |
| C01982 | 1  | 10 | 6  | 9  | 2  | 11 | 8  | 5  | 4  | 7  | 3  |
| C13816 | 3  | 9  | 5  | 11 | 10 | 8  | 2  | 1  | 4  | 7  | 6  |

|        |    |    |    |    |    |    |    |    |    |    |    |
|--------|----|----|----|----|----|----|----|----|----|----|----|
| C08351 | 2  | 4  | 9  | 1  | 10 | 8  | 11 | 7  | 6  | 3  | 5  |
| C01756 | 4  | 11 | 2  | 8  | 9  | 5  | 10 | 6  | 1  | 7  | 3  |
| C06941 | 6  | 4  | 11 | 1  | 3  | 10 | 8  | 9  | 7  | 5  | 2  |
| C10853 | 10 | 11 | 2  | 4  | 9  | 6  | 3  | 5  | 7  | 8  | 1  |
| C07755 | 1  | 2  | 4  | 5  | 6  | 8  | 10 | 3  | 11 | 9  | 7  |
| C14347 | 4  | 5  | 8  | 10 | 6  | 3  | 9  | 11 | 1  | 7  | 2  |
| C01993 | 8  | 2  | 4  | 6  | 1  | 11 | 10 | 3  | 7  | 5  | 9  |
| C02926 | 5  | 11 | 1  | 3  | 2  | 9  | 10 | 4  | 6  | 8  | 7  |
| C10651 | 10 | 3  | 5  | 11 | 2  | 4  | 1  | 9  | 8  | 6  | 7  |
| C08480 | 10 | 5  | 2  | 11 | 3  | 7  | 8  | 6  | 1  | 4  | 9  |
| C08389 | 11 | 4  | 10 | 9  | 2  | 3  | 7  | 8  | 6  | 5  | 1  |
| C10644 | 11 | 5  | 9  | 1  | 7  | 10 | 3  | 6  | 2  | 4  | 8  |
| C15533 | 1  | 5  | 2  | 9  | 8  | 11 | 10 | 7  | 3  | 6  | 4  |
| C01449 | 6  | 2  | 4  | 8  | 1  | 5  | 3  | 11 | 7  | 9  | 10 |
| C11684 | 5  | 10 | 11 | 2  | 8  | 1  | 6  | 4  | 3  | 7  | 9  |
| C08631 | 10 | 3  | 9  | 11 | 2  | 5  | 8  | 7  | 1  | 4  | 6  |
| C15677 | 5  | 6  | 9  | 3  | 1  | 7  | 8  | 11 | 4  | 2  | 10 |
| C13834 | 8  | 11 | 9  | 2  | 3  | 7  | 4  | 1  | 5  | 10 | 6  |
| C11316 | 11 | 9  | 10 | 5  | 1  | 2  | 3  | 4  | 8  | 7  | 6  |
| C11767 | 10 | 5  | 3  | 6  | 2  | 11 | 9  | 8  | 1  | 4  | 7  |
| C07921 | 5  | 10 | 11 | 8  | 6  | 1  | 3  | 9  | 4  | 7  | 2  |
| C10746 | 11 | 10 | 5  | 9  | 4  | 3  | 7  | 8  | 1  | 2  | 6  |
| C08355 | 1  | 2  | 5  | 10 | 7  | 8  | 3  | 11 | 6  | 9  | 4  |
| C10851 | 10 | 2  | 9  | 7  | 1  | 6  | 5  | 8  | 4  | 3  | 11 |
| C14246 | 11 | 2  | 4  | 3  | 6  | 1  | 8  | 7  | 10 | 9  | 5  |
| C01381 | 1  | 2  | 10 | 5  | 6  | 8  | 3  | 4  | 11 | 9  | 7  |
| C11205 | 5  | 1  | 10 | 2  | 4  | 11 | 6  | 8  | 3  | 9  | 7  |
| C09406 | 9  | 7  | 10 | 8  | 3  | 4  | 6  | 2  | 5  | 11 | 1  |
| C08773 | 1  | 10 | 3  | 2  | 8  | 5  | 11 | 6  | 7  | 9  | 4  |
| C13173 | 9  | 10 | 6  | 11 | 7  | 5  | 4  | 3  | 8  | 1  | 2  |
| C05339 | 1  | 2  | 11 | 5  | 6  | 4  | 8  | 7  | 9  | 3  | 10 |
| C01358 | 2  | 1  | 11 | 5  | 8  | 3  | 6  | 10 | 7  | 4  | 9  |
| C11390 | 9  | 2  | 8  | 11 | 6  | 1  | 5  | 3  | 7  | 4  | 10 |
| C10968 | 5  | 10 | 11 | 6  | 8  | 3  | 4  | 2  | 1  | 9  | 7  |
| C09411 | 10 | 11 | 5  | 8  | 7  | 9  | 4  | 3  | 6  | 1  | 2  |
| C13061 | 10 | 8  | 5  | 7  | 3  | 9  | 2  | 1  | 11 | 4  | 6  |
| C07257 | 11 | 4  | 2  | 10 | 9  | 3  | 5  | 8  | 1  | 6  | 7  |
| C08472 | 5  | 10 | 8  | 11 | 6  | 1  | 9  | 4  | 3  | 2  | 7  |
| C14195 | 11 | 1  | 2  | 5  | 7  | 9  | 10 | 3  | 6  | 4  | 8  |
| C08173 | 3  | 5  | 11 | 8  | 7  | 9  | 10 | 1  | 6  | 2  | 4  |
| C11028 | 11 | 10 | 9  | 2  | 4  | 8  | 6  | 3  | 1  | 7  | 5  |
| C05071 | 11 | 8  | 6  | 1  | 5  | 7  | 2  | 3  | 10 | 9  | 4  |
| C14679 | 2  | 8  | 1  | 9  | 6  | 4  | 10 | 11 | 3  | 7  | 5  |

|        |    |    |    |    |    |    |    |    |    |    |    |
|--------|----|----|----|----|----|----|----|----|----|----|----|
| C12305 | 9  | 11 | 5  | 10 | 3  | 2  | 6  | 1  | 8  | 4  | 7  |
| C00753 | 2  | 6  | 8  | 5  | 1  | 9  | 7  | 11 | 4  | 10 | 3  |
| C08686 | 9  | 2  | 7  | 6  | 3  | 11 | 10 | 1  | 8  | 4  | 5  |
| C06538 | 10 | 5  | 8  | 3  | 1  | 2  | 4  | 7  | 11 | 9  | 6  |
| C08414 | 11 | 4  | 5  | 2  | 6  | 10 | 3  | 9  | 7  | 1  | 8  |
| C14743 | 11 | 9  | 5  | 6  | 10 | 1  | 2  | 4  | 7  | 3  | 8  |
| C00404 | 4  | 8  | 2  | 1  | 5  | 9  | 6  | 10 | 7  | 3  | 11 |
| C10132 | 1  | 10 | 11 | 9  | 2  | 7  | 8  | 5  | 3  | 4  | 6  |
| C03894 | 2  | 8  | 1  | 6  | 10 | 7  | 9  | 11 | 5  | 3  | 4  |
| C07371 | 11 | 10 | 5  | 4  | 8  | 2  | 9  | 7  | 3  | 6  | 1  |
| C02037 | 5  | 6  | 2  | 8  | 10 | 7  | 4  | 3  | 11 | 1  | 9  |
| C13655 | 10 | 1  | 9  | 3  | 4  | 8  | 6  | 2  | 5  | 11 | 7  |
| C10375 | 10 | 6  | 11 | 1  | 3  | 9  | 4  | 8  | 2  | 7  | 5  |
| C12847 | 10 | 9  | 5  | 11 | 6  | 1  | 4  | 3  | 7  | 8  | 2  |
| C07890 | 5  | 3  | 10 | 6  | 1  | 4  | 2  | 8  | 11 | 7  | 9  |
| C02500 | 1  | 2  | 8  | 5  | 11 | 4  | 6  | 9  | 10 | 3  | 7  |
| C09792 | 9  | 6  | 11 | 2  | 4  | 10 | 7  | 3  | 5  | 1  | 8  |
| C07207 | 4  | 11 | 6  | 9  | 1  | 2  | 5  | 10 | 8  | 3  | 7  |
| C07526 | 1  | 10 | 5  | 2  | 11 | 4  | 6  | 3  | 9  | 8  | 7  |
| C08636 | 3  | 9  | 10 | 5  | 4  | 7  | 2  | 6  | 11 | 8  | 1  |
| C07809 | 10 | 7  | 2  | 1  | 5  | 3  | 6  | 4  | 9  | 8  | 11 |
| C14702 | 11 | 6  | 5  | 2  | 1  | 9  | 8  | 4  | 10 | 7  | 3  |
| C02341 | 1  | 5  | 2  | 11 | 8  | 6  | 9  | 3  | 4  | 10 | 7  |
| C01404 | 3  | 5  | 10 | 4  | 11 | 8  | 9  | 2  | 6  | 1  | 7  |
| C08118 | 10 | 9  | 5  | 6  | 11 | 4  | 7  | 3  | 8  | 1  | 2  |
| C08246 | 10 | 1  | 3  | 11 | 5  | 6  | 7  | 9  | 8  | 4  | 2  |
| C08235 | 1  | 8  | 10 | 4  | 5  | 9  | 3  | 7  | 2  | 11 | 6  |
| C14753 | 3  | 10 | 11 | 9  | 2  | 8  | 4  | 7  | 1  | 6  | 5  |
| C07391 | 8  | 11 | 9  | 2  | 5  | 10 | 6  | 4  | 3  | 7  | 1  |
| C14341 | 11 | 5  | 8  | 6  | 4  | 10 | 3  | 2  | 9  | 7  | 1  |
| C10888 | 10 | 2  | 5  | 4  | 6  | 1  | 9  | 8  | 3  | 7  | 11 |
| C08810 | 9  | 10 | 3  | 7  | 5  | 8  | 11 | 1  | 6  | 2  | 4  |
| C08698 | 10 | 9  | 11 | 2  | 6  | 1  | 8  | 4  | 7  | 3  | 5  |
| C04415 | 4  | 1  | 9  | 8  | 3  | 10 | 5  | 7  | 2  | 11 | 6  |
| C08447 | 10 | 11 | 9  | 1  | 7  | 2  | 6  | 8  | 3  | 5  | 4  |
| C08076 | 5  | 11 | 9  | 3  | 2  | 4  | 1  | 7  | 10 | 8  | 6  |
| C14493 | 3  | 10 | 7  | 5  | 6  | 11 | 4  | 2  | 9  | 8  | 1  |
| C15436 | 2  | 4  | 5  | 11 | 8  | 3  | 6  | 9  | 7  | 1  | 10 |
| C14398 | 11 | 5  | 10 | 2  | 6  | 7  | 1  | 3  | 9  | 8  | 4  |
| C13189 | 11 | 8  | 5  | 6  | 3  | 2  | 4  | 7  | 1  | 10 | 9  |
| C06478 | 1  | 5  | 2  | 4  | 10 | 8  | 6  | 7  | 11 | 3  | 9  |
| C08273 | 5  | 9  | 10 | 8  | 6  | 2  | 1  | 4  | 11 | 7  | 3  |
| C05349 | 10 | 9  | 11 | 4  | 5  | 6  | 8  | 7  | 1  | 3  | 2  |

|        |    |    |    |    |    |    |    |    |    |    |    |
|--------|----|----|----|----|----|----|----|----|----|----|----|
| C13841 | 11 | 10 | 8  | 9  | 3  | 7  | 2  | 1  | 4  | 6  | 5  |
| C12081 | 3  | 1  | 4  | 7  | 10 | 8  | 11 | 9  | 2  | 6  | 5  |
| C09648 | 9  | 11 | 8  | 3  | 10 | 5  | 7  | 6  | 4  | 2  | 1  |
| C11701 | 8  | 1  | 11 | 2  | 5  | 3  | 7  | 10 | 9  | 4  | 6  |
| C14363 | 11 | 7  | 8  | 4  | 9  | 5  | 3  | 10 | 6  | 2  | 1  |
| C10906 | 1  | 2  | 6  | 8  | 5  | 9  | 10 | 11 | 4  | 3  | 7  |
| C01192 | 2  | 3  | 6  | 8  | 1  | 7  | 11 | 5  | 10 | 9  | 4  |
| C10471 | 10 | 11 | 3  | 5  | 8  | 4  | 6  | 1  | 2  | 7  | 9  |
| C14714 | 11 | 10 | 2  | 7  | 9  | 8  | 5  | 3  | 6  | 1  | 4  |
| C10138 | 2  | 6  | 8  | 10 | 9  | 1  | 7  | 4  | 3  | 11 | 5  |
| C09336 | 10 | 6  | 1  | 5  | 8  | 2  | 3  | 4  | 11 | 9  | 7  |
| C14570 | 11 | 5  | 8  | 3  | 7  | 6  | 10 | 1  | 4  | 9  | 2  |
| C02240 | 11 | 2  | 8  | 6  | 1  | 9  | 5  | 10 | 3  | 4  | 7  |
| C00855 | 5  | 2  | 6  | 1  | 8  | 10 | 4  | 9  | 3  | 11 | 7  |
| C14369 | 11 | 5  | 4  | 8  | 6  | 9  | 7  | 10 | 3  | 1  | 2  |
| C11093 | 11 | 10 | 9  | 2  | 1  | 8  | 4  | 7  | 5  | 3  | 6  |
| C14730 | 11 | 5  | 4  | 7  | 3  | 2  | 8  | 6  | 10 | 9  | 1  |
| C00579 | 5  | 8  | 2  | 1  | 6  | 9  | 11 | 3  | 4  | 10 | 7  |
| C05902 | 10 | 11 | 8  | 5  | 6  | 1  | 3  | 9  | 7  | 4  | 2  |
| C01510 | 1  | 2  | 8  | 5  | 4  | 6  | 11 | 10 | 9  | 7  | 3  |
| C00830 | 2  | 1  | 6  | 8  | 5  | 11 | 3  | 9  | 7  | 4  | 10 |
| C13140 | 2  | 11 | 7  | 5  | 8  | 4  | 1  | 6  | 9  | 3  | 10 |
| C07264 | 10 | 3  | 5  | 2  | 1  | 4  | 6  | 9  | 8  | 11 | 7  |
| C08978 | 1  | 9  | 7  | 11 | 10 | 3  | 4  | 2  | 8  | 5  | 6  |
| C10178 | 10 | 9  | 11 | 7  | 6  | 3  | 1  | 2  | 4  | 8  | 5  |
| C03790 | 2  | 8  | 6  | 5  | 11 | 1  | 9  | 3  | 4  | 10 | 7  |
| C07301 | 11 | 2  | 4  | 6  | 5  | 8  | 10 | 7  | 9  | 3  | 1  |
| C09067 | 10 | 8  | 6  | 4  | 1  | 3  | 2  | 5  | 11 | 9  | 7  |
| C06239 | 1  | 4  | 9  | 2  | 10 | 3  | 7  | 8  | 6  | 11 | 5  |
| C10675 | 10 | 3  | 5  | 11 | 4  | 1  | 6  | 8  | 7  | 2  | 9  |
| C15230 | 10 | 5  | 11 | 9  | 8  | 4  | 2  | 3  | 6  | 7  | 1  |
| C13684 | 9  | 10 | 8  | 6  | 1  | 5  | 11 | 4  | 7  | 3  | 2  |
| C15768 | 1  | 9  | 5  | 4  | 10 | 2  | 8  | 3  | 11 | 6  | 7  |
| C06229 | 2  | 4  | 9  | 8  | 10 | 7  | 1  | 6  | 3  | 11 | 5  |
| C11071 | 11 | 10 | 9  | 2  | 5  | 1  | 3  | 6  | 8  | 4  | 7  |
| C08481 | 5  | 10 | 1  | 9  | 4  | 11 | 3  | 8  | 6  | 7  | 2  |
| C06345 | 8  | 2  | 4  | 6  | 10 | 3  | 5  | 11 | 1  | 7  | 9  |
| C10946 | 5  | 2  | 6  | 8  | 1  | 11 | 3  | 10 | 4  | 9  | 7  |
| C01087 | 1  | 5  | 2  | 8  | 6  | 11 | 3  | 9  | 10 | 4  | 7  |
| C10807 | 1  | 11 | 5  | 2  | 8  | 9  | 4  | 6  | 3  | 10 | 7  |
| C11292 | 5  | 3  | 9  | 11 | 10 | 1  | 2  | 8  | 6  | 7  | 4  |
| C09700 | 10 | 3  | 2  | 1  | 5  | 9  | 11 | 4  | 8  | 6  | 7  |
| C13948 | 3  | 9  | 10 | 8  | 6  | 4  | 11 | 5  | 7  | 2  | 1  |

|        |    |    |    |    |    |    |    |    |    |    |    |
|--------|----|----|----|----|----|----|----|----|----|----|----|
| C13710 | 5  | 6  | 1  | 10 | 8  | 4  | 7  | 2  | 11 | 3  | 9  |
| C11793 | 10 | 11 | 4  | 5  | 1  | 2  | 6  | 9  | 3  | 8  | 7  |
| C05021 | 1  | 5  | 2  | 8  | 10 | 6  | 3  | 11 | 9  | 4  | 7  |
| C07659 | 10 | 8  | 9  | 7  | 3  | 6  | 1  | 2  | 5  | 4  | 11 |
| C03708 | 1  | 11 | 5  | 2  | 3  | 6  | 9  | 10 | 8  | 7  | 4  |
| C03851 | 4  | 2  | 5  | 6  | 9  | 10 | 11 | 7  | 1  | 8  | 3  |
| C10459 | 3  | 10 | 5  | 9  | 6  | 8  | 7  | 11 | 4  | 2  | 1  |
| C11685 | 5  | 10 | 8  | 11 | 2  | 6  | 3  | 4  | 9  | 1  | 7  |
| C10943 | 5  | 8  | 1  | 11 | 10 | 6  | 2  | 4  | 9  | 3  | 7  |
| C04661 | 3  | 8  | 2  | 1  | 9  | 6  | 5  | 4  | 11 | 10 | 7  |
| C09836 | 9  | 11 | 6  | 5  | 8  | 1  | 7  | 2  | 3  | 4  | 10 |
| C14371 | 11 | 8  | 5  | 6  | 7  | 3  | 2  | 1  | 9  | 4  | 10 |
| C14424 | 11 | 4  | 8  | 10 | 5  | 2  | 7  | 3  | 6  | 9  | 1  |
| C00716 | 5  | 2  | 1  | 6  | 8  | 10 | 3  | 9  | 4  | 11 | 7  |
| C08186 | 3  | 7  | 10 | 5  | 8  | 2  | 6  | 11 | 1  | 4  | 9  |
| C03604 | 1  | 8  | 2  | 9  | 5  | 10 | 4  | 7  | 11 | 3  | 6  |
| C07825 | 1  | 10 | 3  | 5  | 2  | 11 | 8  | 6  | 9  | 7  | 4  |
| C00303 | 5  | 2  | 1  | 6  | 8  | 4  | 10 | 9  | 11 | 3  | 7  |
| C14254 | 3  | 8  | 11 | 1  | 10 | 6  | 4  | 5  | 9  | 7  | 2  |
| C15657 | 3  | 6  | 1  | 9  | 7  | 8  | 5  | 11 | 10 | 2  | 4  |
| C12661 | 8  | 6  | 3  | 5  | 9  | 2  | 11 | 1  | 10 | 7  | 4  |
| C11303 | 3  | 6  | 10 | 5  | 8  | 7  | 4  | 9  | 11 | 1  | 2  |
| C10510 | 10 | 5  | 1  | 4  | 3  | 11 | 8  | 7  | 9  | 2  | 6  |
| C14469 | 11 | 4  | 5  | 8  | 2  | 6  | 7  | 1  | 3  | 9  | 10 |
| C16138 | 2  | 1  | 6  | 7  | 11 | 5  | 4  | 10 | 3  | 9  | 8  |
| C03339 | 1  | 2  | 5  | 8  | 4  | 10 | 3  | 11 | 9  | 6  | 7  |
| C10282 | 10 | 6  | 4  | 7  | 5  | 11 | 9  | 2  | 3  | 1  | 8  |
| C16457 | 5  | 11 | 10 | 7  | 4  | 3  | 9  | 2  | 1  | 8  | 6  |
| C13705 | 1  | 2  | 6  | 11 | 8  | 4  | 3  | 5  | 10 | 9  | 7  |
| C10660 | 10 | 2  | 9  | 6  | 11 | 8  | 1  | 4  | 3  | 5  | 7  |
| C15277 | 3  | 5  | 6  | 10 | 2  | 11 | 9  | 7  | 8  | 1  | 4  |
| C00115 | 1  | 11 | 5  | 2  | 8  | 6  | 3  | 4  | 10 | 9  | 7  |
| C08187 | 3  | 5  | 10 | 4  | 1  | 6  | 2  | 11 | 7  | 9  | 8  |
| C01951 | 9  | 11 | 10 | 2  | 1  | 5  | 8  | 3  | 6  | 4  | 7  |
| C06969 | 3  | 5  | 2  | 4  | 11 | 1  | 6  | 10 | 8  | 7  | 9  |
| C15500 | 8  | 5  | 1  | 6  | 9  | 7  | 10 | 3  | 2  | 11 | 4  |
| C01760 | 10 | 2  | 9  | 8  | 11 | 5  | 3  | 7  | 1  | 4  | 6  |
| C15759 | 8  | 6  | 11 | 2  | 4  | 1  | 3  | 10 | 5  | 9  | 7  |
| C06931 | 11 | 8  | 2  | 6  | 4  | 5  | 3  | 10 | 9  | 1  | 7  |
| C12667 | 10 | 1  | 11 | 5  | 8  | 4  | 3  | 9  | 6  | 2  | 7  |
| C12088 | 5  | 6  | 2  | 8  | 10 | 1  | 3  | 9  | 11 | 4  | 7  |
| C00968 | 4  | 10 | 1  | 7  | 2  | 6  | 3  | 9  | 8  | 11 | 5  |
| C08907 | 1  | 10 | 11 | 3  | 2  | 5  | 8  | 9  | 6  | 4  | 7  |

|        |    |    |    |    |    |    |    |    |    |    |    |
|--------|----|----|----|----|----|----|----|----|----|----|----|
| C16501 | 9  | 2  | 6  | 8  | 3  | 1  | 10 | 7  | 5  | 11 | 4  |
| C08126 | 10 | 9  | 5  | 11 | 3  | 1  | 6  | 7  | 8  | 2  | 4  |
| C01843 | 6  | 5  | 8  | 2  | 4  | 10 | 7  | 3  | 9  | 11 | 1  |
| C09213 | 5  | 11 | 4  | 9  | 1  | 6  | 3  | 10 | 8  | 7  | 2  |
| C15026 | 10 | 5  | 6  | 11 | 3  | 1  | 2  | 8  | 4  | 9  | 7  |
| C15754 | 5  | 9  | 4  | 8  | 6  | 2  | 11 | 3  | 10 | 7  | 1  |
| C11372 | 11 | 4  | 8  | 9  | 5  | 2  | 10 | 6  | 1  | 3  | 7  |
| C10670 | 11 | 5  | 10 | 3  | 6  | 2  | 7  | 1  | 9  | 8  | 4  |
| C13540 | 10 | 5  | 11 | 8  | 3  | 4  | 9  | 1  | 2  | 6  | 7  |
| C01811 | 1  | 2  | 5  | 4  | 6  | 3  | 9  | 8  | 7  | 10 | 11 |
| C03954 | 11 | 2  | 4  | 8  | 5  | 7  | 3  | 10 | 1  | 6  | 9  |
| C12079 | 1  | 10 | 5  | 11 | 6  | 8  | 2  | 9  | 4  | 3  | 7  |
| C03097 | 1  | 10 | 11 | 5  | 6  | 7  | 2  | 8  | 4  | 3  | 9  |
| C03153 | 1  | 2  | 3  | 5  | 4  | 10 | 11 | 6  | 8  | 7  | 9  |
| C11017 | 5  | 11 | 9  | 4  | 1  | 2  | 8  | 3  | 7  | 6  | 10 |
| C01411 | 9  | 1  | 11 | 8  | 2  | 10 | 7  | 6  | 5  | 4  | 3  |
| C14587 | 3  | 7  | 6  | 5  | 4  | 11 | 9  | 2  | 8  | 1  | 10 |
| C13740 | 4  | 2  | 10 | 1  | 8  | 5  | 9  | 6  | 7  | 3  | 11 |
| C06973 | 9  | 10 | 5  | 1  | 6  | 8  | 2  | 3  | 11 | 4  | 7  |
| C05602 | 5  | 10 | 11 | 8  | 1  | 9  | 2  | 3  | 4  | 6  | 7  |
| C13591 | 10 | 1  | 5  | 3  | 2  | 4  | 7  | 9  | 11 | 8  | 6  |
| C07672 | 11 | 1  | 10 | 9  | 6  | 2  | 5  | 8  | 4  | 7  | 3  |
| C08763 | 10 | 3  | 8  | 2  | 6  | 5  | 11 | 1  | 4  | 7  | 9  |
| C10180 | 3  | 10 | 6  | 2  | 8  | 4  | 5  | 11 | 7  | 9  | 1  |
| C04147 | 1  | 10 | 2  | 9  | 7  | 8  | 6  | 11 | 3  | 4  | 5  |
| C06574 | 1  | 10 | 9  | 8  | 5  | 6  | 4  | 3  | 2  | 11 | 7  |
| C13736 | 5  | 10 | 6  | 8  | 2  | 11 | 1  | 3  | 9  | 4  | 7  |
| C14447 | 11 | 5  | 8  | 2  | 6  | 4  | 9  | 1  | 10 | 7  | 3  |
| C11021 | 11 | 1  | 8  | 2  | 6  | 7  | 9  | 3  | 5  | 10 | 4  |
| C03683 | 5  | 9  | 11 | 4  | 6  | 2  | 8  | 10 | 3  | 1  | 7  |
| C06057 | 3  | 8  | 1  | 6  | 4  | 2  | 10 | 5  | 9  | 11 | 7  |
| C13766 | 3  | 10 | 1  | 9  | 11 | 5  | 6  | 2  | 8  | 7  | 4  |
| C05410 | 1  | 2  | 8  | 10 | 9  | 6  | 7  | 11 | 4  | 3  | 5  |
| C03757 | 11 | 6  | 5  | 1  | 4  | 3  | 7  | 2  | 8  | 9  | 10 |
| C14392 | 3  | 2  | 8  | 11 | 6  | 4  | 9  | 5  | 10 | 1  | 7  |
| C03281 | 10 | 2  | 4  | 9  | 5  | 7  | 8  | 6  | 11 | 3  | 1  |
| C10112 | 10 | 8  | 5  | 11 | 9  | 6  | 3  | 4  | 1  | 2  | 7  |
| C09235 | 10 | 5  | 1  | 4  | 7  | 2  | 3  | 11 | 9  | 8  | 6  |
| C14204 | 3  | 2  | 6  | 11 | 4  | 5  | 8  | 10 | 1  | 9  | 7  |
| C10379 | 1  | 11 | 4  | 8  | 6  | 7  | 10 | 3  | 9  | 2  | 5  |
| C00920 | 6  | 1  | 2  | 5  | 8  | 3  | 11 | 9  | 4  | 10 | 7  |
| C02008 | 9  | 2  | 4  | 3  | 6  | 11 | 10 | 8  | 7  | 5  | 1  |
| C07316 | 3  | 10 | 11 | 5  | 9  | 8  | 2  | 6  | 4  | 7  | 1  |

|        |    |    |    |    |    |    |    |    |    |    |    |
|--------|----|----|----|----|----|----|----|----|----|----|----|
| C09689 | 3  | 9  | 10 | 8  | 7  | 11 | 5  | 4  | 1  | 6  | 2  |
| C00950 | 1  | 5  | 2  | 8  | 6  | 4  | 11 | 3  | 9  | 10 | 7  |
| C02516 | 5  | 6  | 1  | 8  | 2  | 11 | 10 | 4  | 9  | 3  | 7  |
| C15727 | 5  | 2  | 1  | 7  | 3  | 9  | 8  | 11 | 10 | 4  | 6  |
| C10681 | 11 | 2  | 7  | 8  | 1  | 4  | 3  | 10 | 5  | 6  | 9  |
| C11283 | 11 | 1  | 5  | 3  | 2  | 6  | 10 | 9  | 8  | 4  | 7  |
| C15542 | 1  | 7  | 4  | 9  | 2  | 8  | 10 | 3  | 6  | 11 | 5  |
| C10673 | 11 | 8  | 4  | 10 | 2  | 9  | 3  | 1  | 7  | 5  | 6  |
| C08674 | 3  | 6  | 5  | 1  | 2  | 11 | 8  | 7  | 10 | 9  | 4  |
| C07395 | 3  | 9  | 2  | 1  | 5  | 10 | 7  | 11 | 8  | 6  | 4  |
| C06306 | 9  | 11 | 3  | 8  | 2  | 5  | 1  | 6  | 10 | 7  | 4  |
| C09252 | 5  | 2  | 4  | 9  | 10 | 7  | 3  | 1  | 11 | 6  | 8  |
| C02476 | 1  | 2  | 5  | 10 | 3  | 6  | 8  | 9  | 4  | 11 | 7  |
| C12148 | 2  | 8  | 1  | 5  | 11 | 6  | 3  | 4  | 7  | 10 | 9  |
| C06824 | 10 | 5  | 11 | 2  | 3  | 9  | 6  | 4  | 8  | 7  | 1  |
| C07870 | 11 | 5  | 9  | 8  | 2  | 7  | 6  | 1  | 3  | 10 | 4  |
| C15583 | 11 | 5  | 2  | 9  | 4  | 8  | 10 | 3  | 6  | 1  | 7  |
| C09400 | 10 | 8  | 1  | 2  | 5  | 7  | 6  | 4  | 9  | 3  | 11 |
| C14034 | 9  | 10 | 6  | 5  | 11 | 8  | 1  | 7  | 3  | 2  | 4  |
| C08644 | 10 | 6  | 1  | 2  | 9  | 4  | 3  | 7  | 5  | 8  | 11 |
| C14300 | 11 | 4  | 1  | 3  | 5  | 9  | 8  | 10 | 7  | 2  | 6  |
| C11115 | 1  | 11 | 5  | 9  | 10 | 3  | 6  | 2  | 7  | 8  | 4  |
| C14518 | 11 | 2  | 1  | 10 | 3  | 7  | 8  | 5  | 4  | 9  | 6  |
| C13940 | 1  | 11 | 3  | 10 | 6  | 2  | 4  | 9  | 8  | 7  | 5  |
| C14436 | 1  | 10 | 7  | 11 | 5  | 9  | 2  | 4  | 3  | 6  | 8  |
| C12981 | 8  | 3  | 9  | 10 | 11 | 1  | 2  | 5  | 4  | 7  | 6  |
| C15638 | 3  | 8  | 9  | 10 | 2  | 6  | 5  | 1  | 11 | 4  | 7  |
| C05058 | 11 | 5  | 2  | 8  | 6  | 9  | 4  | 3  | 7  | 10 | 1  |
| C05229 | 8  | 2  | 11 | 9  | 5  | 10 | 6  | 3  | 4  | 1  | 7  |
| C10299 | 10 | 9  | 11 | 5  | 7  | 3  | 6  | 8  | 2  | 4  | 1  |
| C11365 | 11 | 8  | 2  | 10 | 5  | 1  | 7  | 3  | 6  | 4  | 9  |
| C04644 | 3  | 4  | 2  | 9  | 10 | 8  | 1  | 5  | 6  | 11 | 7  |
| C08252 | 1  | 10 | 5  | 8  | 11 | 9  | 6  | 3  | 2  | 7  | 4  |
| C14746 | 11 | 10 | 5  | 9  | 4  | 2  | 7  | 6  | 3  | 8  | 1  |
| C07548 | 10 | 11 | 2  | 5  | 4  | 1  | 6  | 8  | 3  | 9  | 7  |
| C11725 | 10 | 4  | 1  | 3  | 9  | 2  | 5  | 11 | 7  | 6  | 8  |
| C14399 | 11 | 1  | 3  | 10 | 5  | 4  | 8  | 6  | 9  | 2  | 7  |
| C10616 | 9  | 11 | 10 | 7  | 1  | 3  | 8  | 5  | 4  | 6  | 2  |
| C10172 | 5  | 8  | 10 | 3  | 2  | 11 | 6  | 4  | 1  | 9  | 7  |
| C15279 | 11 | 1  | 7  | 6  | 8  | 5  | 10 | 2  | 3  | 4  | 9  |
| C06799 | 9  | 4  | 10 | 8  | 3  | 11 | 7  | 1  | 2  | 5  | 6  |
| C09347 | 10 | 1  | 4  | 8  | 2  | 6  | 3  | 9  | 5  | 11 | 7  |
| C13489 | 3  | 6  | 9  | 4  | 1  | 2  | 8  | 11 | 5  | 7  | 10 |



|        |    |    |    |    |    |    |    |    |    |    |    |
|--------|----|----|----|----|----|----|----|----|----|----|----|
| C06922 | 3  | 5  | 11 | 10 | 9  | 1  | 2  | 8  | 6  | 4  | 7  |
| C10095 | 3  | 6  | 9  | 1  | 2  | 7  | 10 | 5  | 8  | 4  | 11 |
| C08304 | 5  | 10 | 9  | 2  | 6  | 4  | 11 | 3  | 7  | 1  | 8  |
| C15719 | 6  | 8  | 5  | 2  | 9  | 3  | 10 | 11 | 4  | 1  | 7  |
| C10080 | 11 | 9  | 10 | 2  | 6  | 5  | 3  | 4  | 7  | 8  | 1  |
| C10357 | 10 | 4  | 5  | 7  | 11 | 3  | 2  | 8  | 9  | 6  | 1  |
| C09103 | 2  | 9  | 4  | 1  | 11 | 10 | 3  | 6  | 7  | 8  | 5  |
| C03619 | 1  | 2  | 8  | 5  | 6  | 10 | 11 | 7  | 4  | 3  | 9  |
| C03731 | 2  | 9  | 10 | 4  | 11 | 1  | 5  | 3  | 6  | 7  | 8  |
| C04166 | 10 | 2  | 9  | 8  | 11 | 5  | 3  | 6  | 1  | 4  | 7  |
| C00897 | 1  | 2  | 3  | 5  | 8  | 9  | 6  | 4  | 10 | 11 | 7  |
| C04883 | 6  | 2  | 8  | 11 | 7  | 1  | 4  | 3  | 9  | 5  | 10 |
| C06681 | 11 | 9  | 10 | 4  | 8  | 1  | 2  | 5  | 6  | 7  | 3  |
| C14479 | 3  | 11 | 8  | 9  | 2  | 6  | 5  | 1  | 10 | 7  | 4  |
| C15721 | 4  | 9  | 5  | 10 | 1  | 8  | 7  | 3  | 2  | 11 | 6  |
| C05348 | 1  | 2  | 3  | 8  | 10 | 9  | 5  | 4  | 11 | 6  | 7  |
| C04423 | 2  | 8  | 4  | 7  | 9  | 6  | 11 | 10 | 3  | 5  | 1  |
| C11697 | 10 | 3  | 5  | 4  | 2  | 9  | 6  | 1  | 8  | 11 | 7  |
| C10897 | 11 | 3  | 4  | 10 | 2  | 5  | 1  | 8  | 9  | 7  | 6  |
| C10542 | 10 | 2  | 9  | 3  | 5  | 7  | 1  | 4  | 11 | 6  | 8  |
| C08034 | 10 | 9  | 6  | 8  | 4  | 7  | 3  | 11 | 1  | 2  | 5  |
| C13743 | 4  | 9  | 1  | 2  | 10 | 5  | 7  | 3  | 6  | 8  | 11 |
| C16265 | 1  | 2  | 7  | 4  | 5  | 3  | 10 | 9  | 11 | 6  | 8  |
| C10380 | 10 | 1  | 6  | 5  | 4  | 2  | 9  | 3  | 8  | 7  | 11 |
| C08243 | 1  | 8  | 2  | 10 | 5  | 6  | 4  | 3  | 7  | 11 | 9  |
| C13843 | 3  | 6  | 10 | 9  | 8  | 11 | 2  | 1  | 7  | 4  | 5  |
| C02136 | 11 | 5  | 2  | 8  | 10 | 1  | 4  | 6  | 3  | 9  | 7  |
| C10161 | 10 | 11 | 8  | 5  | 7  | 6  | 9  | 4  | 3  | 1  | 2  |
| C01690 | 1  | 3  | 10 | 11 | 8  | 2  | 5  | 9  | 6  | 4  | 7  |
| C00612 | 5  | 6  | 2  | 10 | 8  | 3  | 11 | 9  | 1  | 4  | 7  |
| C11143 | 1  | 2  | 8  | 5  | 11 | 10 | 6  | 3  | 4  | 9  | 7  |
| C09169 | 9  | 5  | 8  | 1  | 2  | 11 | 4  | 6  | 3  | 10 | 7  |
| C12865 | 8  | 10 | 11 | 1  | 9  | 3  | 6  | 2  | 4  | 5  | 7  |
| C10114 | 10 | 11 | 5  | 2  | 3  | 9  | 7  | 6  | 1  | 8  | 4  |
| C11217 | 5  | 10 | 3  | 6  | 8  | 11 | 9  | 2  | 1  | 7  | 4  |
| C10346 | 10 | 11 | 1  | 4  | 5  | 3  | 2  | 6  | 7  | 8  | 9  |
| C09731 | 10 | 8  | 11 | 5  | 2  | 6  | 9  | 1  | 3  | 4  | 7  |
| C10089 | 10 | 5  | 9  | 8  | 6  | 2  | 3  | 7  | 11 | 4  | 1  |
| C01938 | 11 | 9  | 8  | 10 | 5  | 1  | 7  | 3  | 6  | 4  | 2  |
| C07485 | 5  | 10 | 8  | 4  | 1  | 2  | 6  | 11 | 3  | 9  | 7  |
| C14287 | 8  | 1  | 6  | 7  | 4  | 11 | 3  | 5  | 10 | 2  | 9  |
| C06334 | 11 | 1  | 4  | 9  | 8  | 3  | 6  | 10 | 2  | 5  | 7  |
| C11661 | 9  | 2  | 8  | 10 | 5  | 6  | 1  | 3  | 11 | 7  | 4  |

|        |    |    |    |    |    |    |    |    |    |    |    |
|--------|----|----|----|----|----|----|----|----|----|----|----|
| C15743 | 5  | 10 | 6  | 1  | 2  | 3  | 8  | 9  | 11 | 7  | 4  |
| C12170 | 10 | 8  | 11 | 4  | 7  | 3  | 1  | 2  | 9  | 6  | 5  |
| C03687 | 10 | 1  | 6  | 11 | 8  | 5  | 2  | 4  | 9  | 7  | 3  |
| C09060 | 11 | 10 | 5  | 2  | 4  | 8  | 1  | 7  | 6  | 3  | 9  |
| C06763 | 1  | 6  | 10 | 5  | 2  | 9  | 11 | 3  | 7  | 8  | 4  |
| C11782 | 10 | 11 | 8  | 2  | 5  | 9  | 6  | 4  | 3  | 7  | 1  |
| C03079 | 8  | 5  | 6  | 2  | 1  | 10 | 4  | 9  | 7  | 11 | 3  |
| C09357 | 10 | 5  | 3  | 9  | 1  | 4  | 2  | 11 | 6  | 8  | 7  |
| C12933 | 9  | 5  | 11 | 6  | 8  | 3  | 4  | 2  | 7  | 10 | 1  |
| C10923 | 11 | 5  | 2  | 10 | 9  | 8  | 1  | 3  | 4  | 6  | 7  |
| C08705 | 10 | 1  | 2  | 4  | 5  | 6  | 8  | 9  | 11 | 3  | 7  |
| C01093 | 1  | 8  | 10 | 6  | 9  | 7  | 3  | 4  | 11 | 5  | 2  |
| C05990 | 5  | 9  | 10 | 1  | 2  | 4  | 7  | 11 | 8  | 3  | 6  |
| C04685 | 3  | 10 | 4  | 8  | 2  | 6  | 11 | 9  | 7  | 1  | 5  |
| C07973 | 10 | 5  | 11 | 2  | 6  | 1  | 4  | 8  | 3  | 9  | 7  |
| C09304 | 3  | 1  | 10 | 8  | 6  | 7  | 11 | 9  | 2  | 5  | 4  |
| C00715 | 8  | 2  | 5  | 6  | 4  | 10 | 1  | 11 | 9  | 7  | 3  |
| C14015 | 5  | 6  | 7  | 11 | 8  | 1  | 3  | 9  | 2  | 4  | 10 |
| C14344 | 10 | 11 | 6  | 9  | 1  | 7  | 3  | 8  | 5  | 4  | 2  |
| C06717 | 2  | 1  | 11 | 5  | 8  | 3  | 6  | 9  | 10 | 7  | 4  |
| C00528 | 1  | 4  | 8  | 11 | 10 | 3  | 6  | 9  | 7  | 5  | 2  |
| C13831 | 3  | 8  | 11 | 1  | 10 | 4  | 6  | 5  | 2  | 9  | 7  |
| C10828 | 11 | 5  | 10 | 8  | 4  | 2  | 7  | 3  | 1  | 9  | 6  |
| C13415 | 11 | 9  | 6  | 1  | 4  | 3  | 8  | 10 | 2  | 7  | 5  |
| C10507 | 11 | 7  | 4  | 8  | 9  | 3  | 5  | 1  | 10 | 2  | 6  |
| C10278 | 10 | 1  | 5  | 4  | 6  | 3  | 2  | 7  | 9  | 11 | 8  |
| C10866 | 3  | 7  | 9  | 4  | 6  | 2  | 11 | 1  | 8  | 10 | 5  |
| C04931 | 10 | 3  | 4  | 5  | 11 | 2  | 9  | 6  | 8  | 1  | 7  |
| C05117 | 5  | 2  | 1  | 3  | 11 | 9  | 6  | 8  | 4  | 7  | 10 |
| C11758 | 1  | 10 | 9  | 2  | 4  | 8  | 6  | 11 | 5  | 7  | 3  |
| C02846 | 11 | 2  | 8  | 6  | 10 | 4  | 5  | 9  | 1  | 7  | 3  |
| C09027 | 10 | 9  | 2  | 8  | 11 | 3  | 5  | 4  | 1  | 7  | 6  |
| C07287 | 9  | 1  | 11 | 2  | 5  | 3  | 8  | 6  | 10 | 7  | 4  |
| C07409 | 10 | 9  | 11 | 8  | 5  | 6  | 1  | 7  | 4  | 3  | 2  |
| C14219 | 11 | 8  | 5  | 2  | 1  | 6  | 9  | 7  | 4  | 3  | 10 |
| C14674 | 3  | 1  | 2  | 5  | 7  | 9  | 11 | 10 | 8  | 4  | 6  |
| C04078 | 5  | 2  | 8  | 6  | 3  | 1  | 9  | 4  | 11 | 10 | 7  |
| C01666 | 11 | 3  | 8  | 2  | 6  | 10 | 1  | 5  | 9  | 4  | 7  |
| C09882 | 9  | 11 | 3  | 2  | 8  | 5  | 1  | 6  | 10 | 7  | 4  |
| C00711 | 1  | 5  | 2  | 6  | 8  | 3  | 11 | 9  | 10 | 4  | 7  |
| C09977 | 11 | 6  | 1  | 5  | 3  | 7  | 8  | 10 | 2  | 4  | 9  |
| C07840 | 11 | 5  | 3  | 7  | 2  | 10 | 1  | 6  | 9  | 4  | 8  |
| C08476 | 11 | 5  | 6  | 1  | 2  | 4  | 7  | 3  | 10 | 8  | 9  |

|        |    |    |    |    |    |    |    |    |    |    |    |
|--------|----|----|----|----|----|----|----|----|----|----|----|
| C08607 | 9  | 8  | 1  | 3  | 5  | 10 | 2  | 11 | 4  | 6  | 7  |
| C02389 | 11 | 8  | 1  | 2  | 5  | 10 | 6  | 9  | 4  | 3  | 7  |
| C03735 | 1  | 2  | 5  | 8  | 4  | 6  | 3  | 9  | 10 | 7  | 11 |
| C10910 | 11 | 3  | 10 | 8  | 5  | 6  | 9  | 1  | 7  | 2  | 4  |
| C11060 | 9  | 2  | 1  | 3  | 8  | 5  | 6  | 11 | 4  | 10 | 7  |
| C14645 | 3  | 5  | 7  | 9  | 8  | 4  | 6  | 11 | 10 | 2  | 1  |
| C14704 | 11 | 2  | 1  | 3  | 6  | 5  | 4  | 10 | 8  | 9  | 7  |
| C03801 | 8  | 2  | 10 | 11 | 1  | 6  | 4  | 3  | 9  | 7  | 5  |
| C10177 | 10 | 11 | 9  | 5  | 4  | 1  | 7  | 8  | 3  | 6  | 2  |
| C03864 | 2  | 6  | 8  | 1  | 9  | 3  | 7  | 4  | 5  | 11 | 10 |
| C05887 | 1  | 6  | 5  | 2  | 9  | 8  | 3  | 7  | 4  | 11 | 10 |
| C12616 | 1  | 10 | 9  | 5  | 11 | 8  | 2  | 3  | 6  | 7  | 4  |
| C06751 | 2  | 8  | 6  | 5  | 10 | 9  | 11 | 3  | 7  | 1  | 4  |
| C06535 | 10 | 5  | 11 | 3  | 1  | 6  | 8  | 2  | 4  | 9  | 7  |
| C14457 | 11 | 7  | 10 | 9  | 8  | 1  | 3  | 4  | 5  | 2  | 6  |
| C08379 | 9  | 3  | 4  | 1  | 6  | 7  | 10 | 11 | 5  | 2  | 8  |
| C13778 | 4  | 2  | 5  | 10 | 3  | 6  | 7  | 9  | 11 | 1  | 8  |
| C03359 | 11 | 5  | 6  | 3  | 2  | 1  | 10 | 9  | 8  | 7  | 4  |
| C10925 | 11 | 5  | 1  | 3  | 6  | 8  | 10 | 2  | 4  | 9  | 7  |
| C11145 | 2  | 8  | 6  | 5  | 11 | 1  | 10 | 4  | 3  | 9  | 7  |
| C14516 | 1  | 10 | 5  | 8  | 11 | 6  | 9  | 3  | 2  | 4  | 7  |
| C11743 | 10 | 5  | 4  | 9  | 11 | 2  | 3  | 1  | 6  | 7  | 8  |
| C03796 | 9  | 4  | 2  | 10 | 8  | 1  | 6  | 3  | 7  | 5  | 11 |
| C08150 | 3  | 9  | 11 | 5  | 10 | 2  | 8  | 1  | 7  | 6  | 4  |
| C03062 | 1  | 5  | 2  | 8  | 6  | 9  | 7  | 3  | 4  | 10 | 11 |
| C10122 | 10 | 11 | 5  | 3  | 4  | 6  | 9  | 8  | 1  | 7  | 2  |
| C14668 | 3  | 11 | 5  | 9  | 4  | 1  | 6  | 2  | 8  | 7  | 10 |
| C15040 | 5  | 1  | 11 | 6  | 8  | 2  | 10 | 9  | 7  | 3  | 4  |
| C03570 | 1  | 2  | 5  | 4  | 6  | 3  | 9  | 8  | 7  | 10 | 11 |
| C08024 | 10 | 11 | 2  | 5  | 8  | 1  | 7  | 9  | 3  | 6  | 4  |
| C11357 | 10 | 11 | 3  | 5  | 8  | 6  | 9  | 4  | 2  | 1  | 7  |
| C09010 | 10 | 5  | 8  | 3  | 4  | 1  | 6  | 2  | 9  | 11 | 7  |
| C07363 | 5  | 10 | 11 | 4  | 9  | 8  | 3  | 6  | 2  | 7  | 1  |
| C07785 | 5  | 10 | 6  | 8  | 1  | 3  | 9  | 4  | 11 | 2  | 7  |
| C01942 | 3  | 2  | 5  | 6  | 1  | 9  | 7  | 8  | 11 | 4  | 10 |
| C07712 | 3  | 8  | 6  | 1  | 4  | 2  | 11 | 7  | 9  | 5  | 10 |
| C01567 | 1  | 4  | 2  | 7  | 3  | 11 | 10 | 8  | 6  | 5  | 9  |
| C02787 | 5  | 1  | 2  | 10 | 8  | 6  | 11 | 4  | 3  | 9  | 7  |
| C10061 | 3  | 5  | 11 | 9  | 8  | 10 | 4  | 7  | 1  | 6  | 2  |
| C09549 | 10 | 4  | 9  | 8  | 3  | 2  | 11 | 6  | 7  | 1  | 5  |
| C03536 | 4  | 1  | 5  | 6  | 7  | 8  | 9  | 10 | 3  | 2  | 11 |
| C14487 | 3  | 9  | 10 | 4  | 6  | 11 | 5  | 1  | 2  | 7  | 8  |
| C11124 | 11 | 8  | 1  | 3  | 4  | 2  | 6  | 10 | 7  | 9  | 5  |

|        |    |    |    |    |    |    |    |    |    |    |    |
|--------|----|----|----|----|----|----|----|----|----|----|----|
| C00913 | 2  | 11 | 9  | 5  | 4  | 3  | 7  | 8  | 6  | 10 | 1  |
| C07072 | 1  | 5  | 10 | 2  | 3  | 6  | 4  | 11 | 8  | 9  | 7  |
| C07178 | 8  | 10 | 5  | 11 | 9  | 3  | 6  | 4  | 2  | 1  | 7  |
| C01255 | 8  | 11 | 2  | 6  | 9  | 4  | 3  | 5  | 10 | 1  | 7  |
| C03817 | 5  | 9  | 11 | 2  | 7  | 1  | 4  | 3  | 6  | 10 | 8  |
| C08179 | 3  | 8  | 9  | 11 | 2  | 5  | 7  | 6  | 1  | 4  | 10 |
| C03431 | 5  | 10 | 8  | 1  | 3  | 4  | 9  | 11 | 6  | 2  | 7  |
| C09780 | 3  | 1  | 10 | 6  | 11 | 9  | 2  | 4  | 8  | 5  | 7  |
| C13595 | 10 | 5  | 4  | 3  | 2  | 8  | 11 | 1  | 6  | 9  | 7  |
| C04643 | 3  | 2  | 8  | 6  | 7  | 9  | 5  | 10 | 1  | 11 | 4  |
| C10571 | 1  | 5  | 8  | 2  | 6  | 10 | 9  | 7  | 3  | 11 | 4  |
| C04721 | 3  | 6  | 8  | 11 | 2  | 10 | 9  | 1  | 5  | 7  | 4  |
| C08675 | 9  | 2  | 7  | 11 | 5  | 1  | 3  | 8  | 10 | 4  | 6  |
| C14444 | 11 | 4  | 9  | 5  | 6  | 2  | 7  | 3  | 10 | 1  | 8  |
| C09597 | 10 | 8  | 2  | 1  | 5  | 9  | 3  | 6  | 4  | 11 | 7  |
| C04787 | 10 | 2  | 7  | 8  | 3  | 11 | 6  | 9  | 5  | 1  | 4  |
| C07965 | 1  | 10 | 4  | 3  | 9  | 11 | 5  | 2  | 6  | 7  | 8  |
| C13872 | 1  | 3  | 10 | 6  | 9  | 5  | 4  | 11 | 7  | 2  | 8  |
| C15486 | 6  | 8  | 1  | 5  | 10 | 2  | 7  | 11 | 3  | 4  | 9  |
| C15604 | 8  | 9  | 2  | 5  | 4  | 6  | 10 | 11 | 1  | 3  | 7  |
| C15622 | 3  | 9  | 5  | 7  | 1  | 6  | 11 | 8  | 2  | 4  | 10 |
| C11692 | 5  | 10 | 6  | 8  | 2  | 11 | 1  | 4  | 3  | 9  | 7  |
| C10073 | 10 | 1  | 5  | 11 | 9  | 4  | 3  | 2  | 8  | 6  | 7  |
| C00265 | 1  | 5  | 2  | 8  | 6  | 4  | 11 | 3  | 9  | 10 | 7  |
| C14750 | 10 | 3  | 1  | 9  | 11 | 2  | 8  | 5  | 6  | 7  | 4  |
| C10326 | 10 | 8  | 2  | 4  | 6  | 1  | 3  | 11 | 5  | 9  | 7  |
| C12864 | 8  | 11 | 5  | 3  | 2  | 4  | 10 | 6  | 1  | 7  | 9  |
| C11151 | 6  | 1  | 2  | 11 | 8  | 9  | 7  | 3  | 5  | 10 | 4  |
| C04562 | 2  | 6  | 8  | 11 | 9  | 1  | 3  | 7  | 5  | 10 | 4  |
| C02837 | 5  | 8  | 10 | 11 | 2  | 6  | 1  | 3  | 9  | 7  | 4  |
| C04793 | 8  | 2  | 11 | 3  | 4  | 5  | 7  | 1  | 6  | 9  | 10 |
| C07037 | 5  | 10 | 11 | 2  | 6  | 7  | 8  | 3  | 9  | 4  | 1  |
| C15038 | 2  | 8  | 11 | 1  | 4  | 6  | 5  | 10 | 3  | 9  | 7  |
| C09863 | 9  | 11 | 5  | 6  | 2  | 1  | 7  | 10 | 4  | 8  | 3  |
| C03066 | 5  | 6  | 11 | 4  | 1  | 2  | 9  | 8  | 3  | 10 | 7  |
| C11297 | 10 | 8  | 5  | 11 | 2  | 6  | 9  | 3  | 1  | 4  | 7  |
| C01418 | 11 | 10 | 9  | 1  | 6  | 2  | 7  | 5  | 3  | 8  | 4  |
| C14359 | 11 | 1  | 8  | 5  | 2  | 9  | 6  | 4  | 3  | 10 | 7  |
| C11794 | 10 | 11 | 4  | 2  | 1  | 5  | 9  | 6  | 8  | 3  | 7  |
| C11311 | 1  | 2  | 6  | 5  | 3  | 8  | 4  | 11 | 10 | 9  | 7  |
| C13714 | 1  | 5  | 6  | 10 | 7  | 11 | 3  | 8  | 4  | 9  | 2  |
| C06267 | 2  | 11 | 8  | 6  | 5  | 1  | 4  | 7  | 9  | 10 | 3  |
| C09989 | 1  | 11 | 5  | 8  | 9  | 4  | 6  | 10 | 7  | 3  | 2  |

|        |    |    |    |    |    |    |    |    |    |    |    |
|--------|----|----|----|----|----|----|----|----|----|----|----|
| C08513 | 3  | 10 | 5  | 2  | 1  | 11 | 8  | 7  | 9  | 4  | 6  |
| C08154 | 3  | 4  | 9  | 10 | 11 | 6  | 8  | 2  | 7  | 1  | 5  |
| C10625 | 3  | 1  | 11 | 5  | 2  | 6  | 10 | 7  | 8  | 9  | 4  |
| C10097 | 10 | 3  | 5  | 11 | 8  | 1  | 6  | 4  | 9  | 2  | 7  |
| C15617 | 3  | 11 | 1  | 5  | 8  | 9  | 6  | 7  | 2  | 4  | 10 |
| C08393 | 3  | 10 | 1  | 8  | 6  | 11 | 2  | 7  | 5  | 4  | 9  |
| C13814 | 3  | 5  | 8  | 7  | 11 | 1  | 2  | 4  | 6  | 9  | 10 |
| C06338 | 11 | 1  | 3  | 5  | 4  | 2  | 10 | 9  | 7  | 8  | 6  |
| C07577 | 5  | 10 | 11 | 2  | 8  | 1  | 3  | 9  | 6  | 4  | 7  |
| C10362 | 10 | 8  | 5  | 2  | 11 | 9  | 3  | 1  | 7  | 6  | 4  |
| C13424 | 5  | 1  | 8  | 10 | 11 | 2  | 6  | 3  | 7  | 4  | 9  |
| C15265 | 3  | 6  | 2  | 8  | 5  | 11 | 7  | 10 | 4  | 9  | 1  |
| C07590 | 3  | 10 | 1  | 11 | 9  | 2  | 7  | 6  | 8  | 4  | 5  |
| C07171 | 10 | 5  | 11 | 4  | 6  | 9  | 8  | 3  | 1  | 2  | 7  |
| C10125 | 10 | 8  | 1  | 4  | 9  | 6  | 11 | 2  | 3  | 5  | 7  |
| C11379 | 2  | 6  | 10 | 5  | 8  | 9  | 4  | 11 | 1  | 3  | 7  |
| C09236 | 10 | 5  | 9  | 2  | 6  | 7  | 3  | 4  | 11 | 1  | 8  |
| C11730 | 8  | 9  | 5  | 11 | 2  | 10 | 3  | 7  | 4  | 6  | 1  |
| C08494 | 5  | 10 | 7  | 2  | 1  | 9  | 3  | 4  | 8  | 6  | 11 |
| C09280 | 10 | 9  | 2  | 3  | 5  | 6  | 7  | 1  | 11 | 4  | 8  |
| C09186 | 9  | 1  | 8  | 11 | 7  | 5  | 3  | 6  | 10 | 4  | 2  |
| C04024 | 10 | 9  | 4  | 11 | 5  | 7  | 1  | 6  | 3  | 2  | 8  |
| C01062 | 1  | 2  | 6  | 8  | 10 | 9  | 5  | 7  | 3  | 11 | 4  |
| C13353 | 10 | 6  | 9  | 1  | 5  | 2  | 3  | 11 | 8  | 7  | 4  |
| C13029 | 5  | 3  | 10 | 7  | 2  | 6  | 8  | 11 | 1  | 9  | 4  |
| C09830 | 10 | 6  | 11 | 9  | 5  | 3  | 8  | 4  | 7  | 1  | 2  |
| C13612 | 3  | 1  | 10 | 8  | 2  | 6  | 11 | 9  | 5  | 4  | 7  |
| C08886 | 4  | 1  | 9  | 3  | 8  | 7  | 11 | 10 | 6  | 5  | 2  |
| C09129 | 10 | 7  | 8  | 6  | 2  | 11 | 3  | 1  | 4  | 5  | 9  |
| C13144 | 3  | 10 | 5  | 1  | 9  | 8  | 6  | 11 | 7  | 4  | 2  |
| C11253 | 6  | 10 | 1  | 5  | 8  | 2  | 9  | 11 | 3  | 7  | 4  |
| C03662 | 10 | 4  | 5  | 2  | 9  | 1  | 3  | 7  | 8  | 6  | 11 |
| C09163 | 1  | 7  | 10 | 9  | 8  | 6  | 3  | 11 | 4  | 5  | 2  |
| C13883 | 3  | 6  | 8  | 2  | 9  | 11 | 5  | 4  | 1  | 7  | 10 |
| C15643 | 3  | 5  | 11 | 10 | 9  | 1  | 8  | 4  | 2  | 6  | 7  |
| C14002 | 9  | 10 | 1  | 6  | 5  | 8  | 11 | 3  | 2  | 7  | 4  |
| C03686 | 9  | 11 | 6  | 8  | 2  | 3  | 7  | 5  | 4  | 10 | 1  |
| C10402 | 11 | 10 | 3  | 5  | 6  | 8  | 9  | 2  | 1  | 7  | 4  |
| C10658 | 3  | 5  | 10 | 7  | 2  | 8  | 11 | 1  | 4  | 9  | 6  |
| C07816 | 3  | 6  | 4  | 7  | 1  | 10 | 5  | 9  | 11 | 2  | 8  |
| C01328 | 5  | 1  | 11 | 10 | 8  | 9  | 3  | 4  | 6  | 2  | 7  |
| C04010 | 1  | 2  | 8  | 4  | 11 | 6  | 3  | 5  | 10 | 9  | 7  |
| C08289 | 6  | 2  | 9  | 5  | 4  | 8  | 7  | 1  | 10 | 3  | 11 |

|        |    |    |    |    |    |    |    |    |    |    |    |
|--------|----|----|----|----|----|----|----|----|----|----|----|
| C01807 | 1  | 8  | 2  | 5  | 9  | 11 | 10 | 3  | 6  | 7  | 4  |
| C13906 | 10 | 2  | 4  | 5  | 8  | 9  | 3  | 11 | 1  | 7  | 6  |
| C12068 | 5  | 3  | 1  | 11 | 6  | 2  | 4  | 10 | 9  | 8  | 7  |
| C02634 | 5  | 2  | 6  | 8  | 3  | 1  | 4  | 11 | 10 | 9  | 7  |
| C11690 | 10 | 5  | 8  | 11 | 2  | 3  | 9  | 4  | 1  | 7  | 6  |
| C02817 | 6  | 2  | 8  | 3  | 1  | 10 | 4  | 7  | 11 | 9  | 5  |
| C01633 | 11 | 3  | 1  | 10 | 9  | 2  | 5  | 7  | 4  | 8  | 6  |
| C08941 | 11 | 5  | 8  | 10 | 2  | 3  | 4  | 6  | 1  | 7  | 9  |
| C03196 | 1  | 5  | 2  | 8  | 6  | 11 | 3  | 9  | 10 | 4  | 7  |
| C02343 | 5  | 10 | 9  | 11 | 8  | 2  | 1  | 7  | 3  | 6  | 4  |
| C09403 | 10 | 5  | 1  | 11 | 3  | 9  | 8  | 7  | 6  | 4  | 2  |
| C12181 | 10 | 11 | 1  | 8  | 2  | 3  | 6  | 5  | 9  | 7  | 4  |
| C11045 | 1  | 5  | 10 | 8  | 2  | 11 | 3  | 6  | 7  | 9  | 4  |
| C06883 | 10 | 9  | 6  | 5  | 11 | 1  | 3  | 8  | 2  | 4  | 7  |
| C10942 | 11 | 5  | 4  | 1  | 2  | 3  | 9  | 7  | 10 | 6  | 8  |
| C08046 | 10 | 9  | 1  | 2  | 6  | 5  | 3  | 4  | 8  | 7  | 11 |
| C07522 | 3  | 1  | 11 | 10 | 5  | 2  | 6  | 4  | 9  | 8  | 7  |
| C07605 | 10 | 6  | 5  | 8  | 2  | 1  | 9  | 3  | 7  | 11 | 4  |
| C09295 | 10 | 1  | 3  | 7  | 2  | 4  | 11 | 5  | 6  | 8  | 9  |
| C02287 | 1  | 2  | 8  | 5  | 11 | 4  | 6  | 9  | 10 | 3  | 7  |
| C08092 | 6  | 4  | 1  | 9  | 5  | 3  | 11 | 2  | 7  | 8  | 10 |
| C08406 | 10 | 5  | 1  | 8  | 6  | 4  | 2  | 3  | 11 | 9  | 7  |
| C02740 | 4  | 2  | 9  | 6  | 8  | 5  | 1  | 10 | 11 | 3  | 7  |
| C02242 | 4  | 2  | 11 | 8  | 10 | 9  | 5  | 3  | 6  | 7  | 1  |
| C08671 | 9  | 5  | 6  | 7  | 8  | 1  | 3  | 2  | 10 | 11 | 4  |
| C12766 | 6  | 5  | 1  | 8  | 10 | 2  | 3  | 7  | 11 | 9  | 4  |
| C09592 | 10 | 11 | 5  | 2  | 9  | 7  | 4  | 3  | 6  | 1  | 8  |
| C10492 | 5  | 10 | 11 | 7  | 1  | 4  | 2  | 9  | 8  | 3  | 6  |
| C09194 | 5  | 3  | 4  | 10 | 1  | 11 | 9  | 8  | 2  | 6  | 7  |
| C00984 | 1  | 2  | 10 | 5  | 6  | 8  | 3  | 4  | 11 | 9  | 7  |
| C07914 | 10 | 5  | 11 | 6  | 9  | 7  | 1  | 3  | 8  | 2  | 4  |
| C02728 | 5  | 8  | 2  | 10 | 11 | 6  | 1  | 9  | 7  | 3  | 4  |
| C11789 | 10 | 11 | 5  | 4  | 1  | 8  | 6  | 9  | 3  | 7  | 2  |
| C14368 | 11 | 2  | 10 | 4  | 1  | 7  | 6  | 3  | 8  | 9  | 5  |
| C10909 | 11 | 5  | 1  | 10 | 6  | 2  | 9  | 3  | 4  | 7  | 8  |
| C16001 | 8  | 2  | 11 | 10 | 5  | 1  | 3  | 6  | 7  | 9  | 4  |
| C09069 | 10 | 9  | 5  | 11 | 8  | 1  | 2  | 4  | 3  | 7  | 6  |
| C11596 | 3  | 1  | 4  | 10 | 5  | 2  | 8  | 9  | 7  | 6  | 11 |
| C02419 | 6  | 11 | 2  | 7  | 4  | 10 | 3  | 8  | 1  | 5  | 9  |
| C07613 | 3  | 1  | 9  | 10 | 4  | 7  | 11 | 2  | 5  | 8  | 6  |
| C16184 | 3  | 9  | 11 | 1  | 6  | 4  | 7  | 8  | 5  | 10 | 2  |
| C11471 | 9  | 11 | 2  | 10 | 4  | 7  | 6  | 8  | 5  | 3  | 1  |
| C07558 | 4  | 5  | 9  | 7  | 1  | 2  | 3  | 10 | 6  | 11 | 8  |

|        |    |    |    |    |    |    |    |    |    |    |    |
|--------|----|----|----|----|----|----|----|----|----|----|----|
| C09007 | 1  | 10 | 5  | 4  | 2  | 6  | 11 | 3  | 7  | 9  | 8  |
| C03693 | 1  | 2  | 5  | 10 | 3  | 4  | 9  | 8  | 11 | 7  | 6  |
| C02381 | 5  | 9  | 1  | 3  | 6  | 11 | 2  | 7  | 8  | 10 | 4  |
| C07393 | 3  | 9  | 11 | 4  | 10 | 7  | 2  | 5  | 8  | 6  | 1  |
| C06806 | 5  | 4  | 8  | 9  | 3  | 10 | 2  | 6  | 11 | 1  | 7  |
| C08180 | 3  | 11 | 9  | 7  | 1  | 2  | 6  | 10 | 8  | 5  | 4  |
| C10124 | 1  | 10 | 11 | 9  | 4  | 2  | 7  | 6  | 5  | 3  | 8  |
| C04654 | 6  | 2  | 3  | 8  | 5  | 7  | 9  | 11 | 4  | 10 | 1  |
| C10589 | 11 | 8  | 6  | 1  | 4  | 2  | 3  | 7  | 5  | 9  | 10 |
| C16157 | 1  | 2  | 11 | 8  | 7  | 4  | 3  | 10 | 9  | 6  | 5  |
| C14574 | 11 | 2  | 1  | 8  | 7  | 10 | 4  | 3  | 6  | 9  | 5  |
| C08290 | 5  | 6  | 8  | 4  | 10 | 2  | 1  | 11 | 3  | 7  | 9  |
| C08673 | 10 | 5  | 4  | 8  | 9  | 11 | 3  | 6  | 7  | 1  | 2  |
| C03115 | 9  | 2  | 4  | 3  | 10 | 8  | 7  | 11 | 6  | 5  | 1  |
| C09668 | 9  | 10 | 5  | 8  | 4  | 6  | 1  | 2  | 3  | 7  | 11 |
| C06417 | 5  | 6  | 2  | 1  | 8  | 10 | 4  | 9  | 11 | 3  | 7  |
| C09988 | 9  | 8  | 5  | 1  | 10 | 4  | 11 | 2  | 3  | 6  | 7  |
| C09906 | 9  | 11 | 5  | 1  | 2  | 6  | 3  | 8  | 7  | 10 | 4  |
| C03526 | 8  | 3  | 1  | 7  | 5  | 4  | 9  | 10 | 11 | 2  | 6  |
| C11729 | 1  | 10 | 9  | 8  | 11 | 7  | 3  | 6  | 5  | 2  | 4  |
| C14429 | 11 | 10 | 9  | 2  | 3  | 1  | 4  | 8  | 5  | 7  | 6  |
| C12152 | 9  | 1  | 3  | 4  | 5  | 8  | 11 | 6  | 7  | 2  | 10 |
| C07147 | 10 | 5  | 3  | 11 | 8  | 4  | 1  | 7  | 9  | 6  | 2  |
| C10338 | 9  | 8  | 1  | 5  | 11 | 10 | 6  | 3  | 7  | 2  | 4  |
| C10900 | 1  | 11 | 5  | 6  | 10 | 2  | 3  | 9  | 8  | 7  | 4  |
| C08152 | 3  | 9  | 2  | 6  | 1  | 7  | 10 | 4  | 11 | 8  | 5  |
| C07275 | 4  | 10 | 11 | 8  | 6  | 5  | 1  | 2  | 3  | 9  | 7  |
| C11198 | 10 | 2  | 7  | 1  | 8  | 5  | 4  | 6  | 3  | 11 | 9  |
| C08071 | 3  | 11 | 5  | 9  | 2  | 8  | 10 | 1  | 4  | 6  | 7  |
| C10187 | 10 | 7  | 2  | 8  | 6  | 11 | 3  | 5  | 9  | 4  | 1  |
| C08901 | 10 | 9  | 11 | 2  | 1  | 7  | 3  | 4  | 8  | 5  | 6  |
| C07753 | 1  | 10 | 2  | 4  | 5  | 11 | 9  | 3  | 7  | 6  | 8  |
| C02976 | 1  | 2  | 9  | 3  | 5  | 8  | 10 | 4  | 6  | 11 | 7  |
| C11245 | 3  | 1  | 8  | 11 | 6  | 7  | 10 | 5  | 2  | 9  | 4  |
| C07968 | 3  | 1  | 5  | 6  | 7  | 2  | 4  | 9  | 10 | 11 | 8  |
| C13522 | 11 | 1  | 10 | 9  | 4  | 5  | 8  | 2  | 6  | 3  | 7  |
| C16287 | 1  | 5  | 7  | 4  | 11 | 6  | 9  | 3  | 10 | 8  | 2  |
| C10053 | 10 | 3  | 2  | 8  | 1  | 9  | 4  | 11 | 6  | 5  | 7  |
| C08185 | 3  | 9  | 4  | 8  | 5  | 2  | 7  | 11 | 10 | 1  | 6  |
| C13794 | 5  | 1  | 6  | 4  | 8  | 10 | 11 | 7  | 3  | 2  | 9  |
| C06545 | 3  | 10 | 2  | 5  | 11 | 6  | 9  | 4  | 1  | 7  | 8  |
| C08449 | 10 | 11 | 3  | 1  | 2  | 5  | 7  | 4  | 8  | 6  | 9  |
| C04211 | 5  | 9  | 6  | 4  | 7  | 1  | 2  | 3  | 11 | 8  | 10 |

|        |    |    |    |    |    |    |    |    |    |    |    |
|--------|----|----|----|----|----|----|----|----|----|----|----|
| C04207 | 5  | 9  | 1  | 2  | 10 | 11 | 3  | 7  | 4  | 8  | 6  |
| C06682 | 6  | 5  | 8  | 1  | 2  | 9  | 7  | 11 | 4  | 10 | 3  |
| C11049 | 9  | 3  | 5  | 11 | 1  | 10 | 4  | 8  | 2  | 6  | 7  |
| C03767 | 2  | 8  | 11 | 5  | 6  | 9  | 10 | 1  | 3  | 7  | 4  |
| C08272 | 9  | 5  | 3  | 1  | 11 | 4  | 10 | 8  | 2  | 7  | 6  |
| C10550 | 11 | 10 | 9  | 8  | 2  | 5  | 7  | 1  | 4  | 3  | 6  |
| C14284 | 3  | 11 | 4  | 9  | 2  | 6  | 5  | 10 | 8  | 1  | 7  |
| C07523 | 5  | 1  | 11 | 2  | 10 | 6  | 3  | 4  | 8  | 7  | 9  |
| C09947 | 11 | 10 | 5  | 3  | 2  | 6  | 4  | 1  | 7  | 9  | 8  |
| C01818 | 2  | 8  | 5  | 6  | 4  | 10 | 11 | 7  | 1  | 3  | 9  |
| C14405 | 11 | 3  | 9  | 5  | 8  | 10 | 4  | 7  | 1  | 6  | 2  |
| C14156 | 8  | 9  | 3  | 5  | 11 | 10 | 6  | 4  | 1  | 7  | 2  |
| C14548 | 3  | 11 | 10 | 8  | 2  | 4  | 1  | 6  | 9  | 7  | 5  |
| C12552 | 10 | 4  | 11 | 7  | 9  | 3  | 6  | 5  | 2  | 8  | 1  |
| C08121 | 1  | 11 | 5  | 6  | 9  | 3  | 10 | 7  | 8  | 2  | 4  |
| C07652 | 3  | 11 | 8  | 1  | 5  | 6  | 4  | 9  | 2  | 10 | 7  |
| C08014 | 10 | 5  | 11 | 6  | 1  | 8  | 2  | 9  | 3  | 7  | 4  |
| C09475 | 4  | 9  | 8  | 2  | 1  | 5  | 3  | 11 | 10 | 7  | 6  |
| C14413 | 11 | 8  | 9  | 10 | 3  | 5  | 2  | 7  | 1  | 6  | 4  |
| C06738 | 10 | 5  | 11 | 8  | 2  | 1  | 9  | 6  | 4  | 3  | 7  |
| C02783 | 1  | 4  | 9  | 8  | 10 | 2  | 3  | 11 | 6  | 5  | 7  |
| C07283 | 1  | 10 | 5  | 2  | 6  | 11 | 8  | 3  | 7  | 4  | 9  |
| C05700 | 5  | 2  | 6  | 1  | 8  | 9  | 11 | 3  | 10 | 7  | 4  |
| C10144 | 10 | 1  | 2  | 3  | 8  | 5  | 9  | 11 | 7  | 4  | 6  |
| C10310 | 11 | 8  | 10 | 9  | 5  | 1  | 6  | 4  | 3  | 2  | 7  |
| C10339 | 10 | 1  | 8  | 9  | 11 | 6  | 4  | 3  | 2  | 5  | 7  |
| C06081 | 9  | 1  | 3  | 8  | 2  | 7  | 6  | 10 | 5  | 4  | 11 |
| C04030 | 9  | 2  | 4  | 11 | 10 | 6  | 8  | 3  | 1  | 7  | 5  |
| C08164 | 3  | 1  | 2  | 11 | 9  | 7  | 6  | 10 | 8  | 4  | 5  |
| C06819 | 5  | 6  | 11 | 8  | 9  | 2  | 10 | 4  | 7  | 1  | 3  |
| C09228 | 11 | 3  | 9  | 5  | 7  | 1  | 10 | 4  | 2  | 6  | 8  |
| C13055 | 9  | 10 | 1  | 6  | 11 | 5  | 3  | 8  | 7  | 4  | 2  |
| C11392 | 9  | 8  | 2  | 11 | 3  | 1  | 6  | 4  | 10 | 5  | 7  |
| C02086 | 5  | 2  | 1  | 8  | 11 | 10 | 6  | 4  | 3  | 9  | 7  |
| C07565 | 11 | 3  | 5  | 8  | 10 | 6  | 1  | 2  | 9  | 7  | 4  |
| C03755 | 10 | 7  | 9  | 8  | 4  | 1  | 3  | 2  | 6  | 11 | 5  |
| C12193 | 10 | 5  | 2  | 11 | 6  | 8  | 3  | 4  | 9  | 1  | 7  |
| C11001 | 11 | 4  | 2  | 7  | 5  | 6  | 3  | 10 | 1  | 9  | 8  |
| C11347 | 6  | 5  | 9  | 8  | 3  | 7  | 1  | 11 | 4  | 2  | 10 |
| C09716 | 9  | 1  | 8  | 11 | 2  | 5  | 6  | 10 | 3  | 4  | 7  |
| C02040 | 5  | 9  | 10 | 6  | 2  | 1  | 7  | 8  | 11 | 3  | 4  |
| C15712 | 5  | 10 | 9  | 1  | 8  | 6  | 3  | 2  | 7  | 4  | 11 |
| C12070 | 5  | 4  | 10 | 8  | 3  | 2  | 11 | 6  | 7  | 9  | 1  |



|        |    |    |    |    |    |    |    |    |    |    |    |
|--------|----|----|----|----|----|----|----|----|----|----|----|
| C10740 | 10 | 3  | 9  | 7  | 5  | 11 | 6  | 2  | 1  | 4  | 8  |
| C08999 | 10 | 3  | 9  | 2  | 1  | 4  | 6  | 7  | 11 | 5  | 8  |
| C02421 | 8  | 2  | 5  | 11 | 1  | 10 | 4  | 6  | 7  | 3  | 9  |
| C14058 | 9  | 11 | 2  | 5  | 10 | 1  | 6  | 4  | 3  | 8  | 7  |
| C15690 | 9  | 1  | 11 | 2  | 5  | 10 | 6  | 8  | 7  | 3  | 4  |
| C10318 | 10 | 11 | 9  | 8  | 4  | 5  | 6  | 3  | 7  | 2  | 1  |
| C14214 | 11 | 3  | 4  | 10 | 1  | 5  | 2  | 8  | 7  | 6  | 9  |
| C03034 | 2  | 6  | 8  | 10 | 9  | 11 | 7  | 3  | 5  | 1  | 4  |
| C05052 | 1  | 2  | 8  | 9  | 5  | 6  | 4  | 10 | 11 | 3  | 7  |
| C10721 | 3  | 10 | 4  | 9  | 11 | 2  | 5  | 8  | 6  | 1  | 7  |
| C06543 | 9  | 3  | 1  | 4  | 10 | 2  | 7  | 8  | 11 | 6  | 5  |
| C01502 | 11 | 5  | 10 | 9  | 8  | 1  | 6  | 3  | 2  | 4  | 7  |
| C03761 | 3  | 1  | 11 | 5  | 8  | 6  | 9  | 2  | 10 | 4  | 7  |
| C11877 | 9  | 2  | 1  | 5  | 6  | 7  | 3  | 10 | 4  | 8  | 11 |
| C06541 | 8  | 10 | 6  | 9  | 4  | 11 | 1  | 3  | 2  | 5  | 7  |
| C07758 | 3  | 11 | 4  | 5  | 2  | 1  | 9  | 8  | 7  | 10 | 6  |
| C11737 | 4  | 2  | 8  | 11 | 5  | 6  | 1  | 7  | 10 | 9  | 3  |
| C10266 | 10 | 9  | 3  | 11 | 2  | 8  | 6  | 1  | 5  | 4  | 7  |
| C09640 | 10 | 3  | 5  | 1  | 8  | 4  | 7  | 9  | 6  | 11 | 2  |
| C10324 | 10 | 2  | 6  | 4  | 1  | 9  | 8  | 5  | 3  | 7  | 11 |
| C03642 | 3  | 4  | 2  | 7  | 8  | 6  | 5  | 1  | 10 | 11 | 9  |
| C09036 | 10 | 5  | 6  | 9  | 2  | 1  | 11 | 3  | 4  | 7  | 8  |
| C08954 | 1  | 10 | 2  | 11 | 8  | 4  | 5  | 6  | 9  | 3  | 7  |
| C11095 | 9  | 11 | 8  | 5  | 10 | 7  | 4  | 1  | 3  | 2  | 6  |
| C14504 | 11 | 4  | 5  | 10 | 8  | 9  | 3  | 7  | 6  | 2  | 1  |
| C10108 | 10 | 11 | 5  | 8  | 3  | 1  | 2  | 4  | 7  | 9  | 6  |
| C04572 | 1  | 5  | 2  | 7  | 8  | 6  | 9  | 3  | 4  | 10 | 11 |
| C08001 | 10 | 6  | 11 | 3  | 4  | 9  | 5  | 7  | 8  | 1  | 2  |
| C00768 | 5  | 6  | 2  | 1  | 8  | 10 | 4  | 9  | 3  | 7  | 11 |
| C06761 | 11 | 4  | 7  | 2  | 3  | 8  | 10 | 5  | 6  | 9  | 1  |
| C06926 | 3  | 5  | 4  | 1  | 10 | 9  | 7  | 11 | 2  | 6  | 8  |
| C08156 | 3  | 1  | 4  | 5  | 2  | 6  | 9  | 7  | 8  | 11 | 10 |
| C08259 | 1  | 10 | 3  | 7  | 2  | 6  | 11 | 4  | 8  | 5  | 9  |
| C07931 | 11 | 10 | 8  | 3  | 1  | 2  | 5  | 4  | 9  | 6  | 7  |
| C08812 | 3  | 9  | 8  | 11 | 2  | 7  | 5  | 10 | 1  | 4  | 6  |
| C14352 | 1  | 11 | 10 | 9  | 2  | 5  | 3  | 7  | 4  | 6  | 8  |
| C14592 | 11 | 4  | 10 | 6  | 9  | 2  | 3  | 1  | 5  | 8  | 7  |
| C14310 | 11 | 5  | 9  | 6  | 1  | 3  | 7  | 2  | 10 | 8  | 4  |
| C09253 | 10 | 5  | 7  | 4  | 11 | 9  | 2  | 6  | 3  | 1  | 8  |
| C03444 | 1  | 5  | 11 | 2  | 6  | 8  | 4  | 10 | 3  | 9  | 7  |
| C09392 | 11 | 7  | 10 | 9  | 1  | 3  | 5  | 2  | 4  | 6  | 8  |
| C11300 | 5  | 9  | 2  | 1  | 11 | 10 | 6  | 3  | 8  | 4  | 7  |
| C00481 | 2  | 11 | 5  | 6  | 3  | 1  | 10 | 8  | 9  | 7  | 4  |

|        |    |    |    |    |    |    |    |    |    |    |    |
|--------|----|----|----|----|----|----|----|----|----|----|----|
| C03074 | 5  | 9  | 1  | 11 | 4  | 8  | 3  | 6  | 2  | 10 | 7  |
| C02493 | 1  | 10 | 11 | 9  | 3  | 6  | 2  | 4  | 7  | 5  | 8  |
| C02838 | 3  | 5  | 1  | 8  | 9  | 11 | 2  | 7  | 6  | 4  | 10 |
| C13803 | 3  | 1  | 5  | 6  | 2  | 4  | 8  | 9  | 11 | 7  | 10 |
| C03392 | 5  | 2  | 6  | 10 | 3  | 11 | 4  | 1  | 9  | 8  | 7  |
| C06305 | 9  | 11 | 2  | 8  | 5  | 1  | 7  | 6  | 10 | 4  | 3  |
| C10485 | 10 | 5  | 2  | 8  | 11 | 7  | 1  | 6  | 4  | 9  | 3  |
| C10342 | 8  | 10 | 6  | 11 | 5  | 2  | 7  | 1  | 9  | 3  | 4  |
| C11238 | 3  | 1  | 10 | 2  | 4  | 5  | 6  | 8  | 11 | 9  | 7  |
| C01948 | 2  | 5  | 3  | 1  | 11 | 8  | 6  | 4  | 10 | 7  | 9  |
| C07939 | 5  | 10 | 6  | 2  | 11 | 8  | 4  | 1  | 9  | 3  | 7  |
| C07982 | 5  | 10 | 11 | 3  | 2  | 9  | 4  | 8  | 6  | 1  | 7  |
| C08346 | 1  | 10 | 7  | 3  | 4  | 9  | 6  | 2  | 11 | 5  | 8  |
| C13142 | 10 | 6  | 7  | 11 | 5  | 1  | 3  | 8  | 4  | 2  | 9  |
| C10349 | 10 | 11 | 3  | 1  | 9  | 4  | 6  | 8  | 2  | 7  | 5  |
| C14431 | 11 | 10 | 9  | 1  | 3  | 2  | 8  | 6  | 7  | 5  | 4  |
| C06775 | 6  | 8  | 7  | 5  | 2  | 10 | 9  | 11 | 3  | 1  | 4  |
| C08106 | 10 | 9  | 1  | 2  | 6  | 5  | 8  | 11 | 3  | 4  | 7  |
| C14534 | 11 | 5  | 8  | 10 | 7  | 3  | 6  | 2  | 9  | 1  | 4  |
| C09315 | 10 | 11 | 2  | 5  | 8  | 1  | 3  | 9  | 4  | 6  | 7  |
| C11000 | 1  | 11 | 3  | 9  | 10 | 5  | 7  | 8  | 6  | 4  | 2  |
| C08720 | 11 | 10 | 2  | 8  | 4  | 9  | 3  | 1  | 6  | 5  | 7  |
| C15737 | 10 | 8  | 7  | 6  | 11 | 2  | 3  | 9  | 5  | 4  | 1  |
| C14993 | 11 | 3  | 10 | 5  | 2  | 8  | 1  | 4  | 6  | 7  | 9  |
| C02953 | 8  | 2  | 5  | 6  | 11 | 10 | 1  | 4  | 9  | 7  | 3  |
| C10449 | 9  | 10 | 11 | 5  | 8  | 4  | 2  | 3  | 7  | 6  | 1  |
| C14482 | 3  | 1  | 2  | 8  | 6  | 11 | 10 | 7  | 9  | 4  | 5  |
| C04426 | 1  | 7  | 4  | 2  | 8  | 10 | 5  | 3  | 9  | 11 | 6  |
| C15988 | 3  | 1  | 11 | 6  | 7  | 10 | 5  | 9  | 4  | 8  | 2  |
| C11343 | 1  | 3  | 2  | 5  | 10 | 8  | 11 | 9  | 6  | 7  | 4  |
| C07297 | 3  | 6  | 1  | 5  | 9  | 8  | 7  | 2  | 4  | 10 | 11 |
| C08095 | 1  | 4  | 3  | 5  | 10 | 2  | 6  | 9  | 11 | 8  | 7  |
| C09518 | 11 | 10 | 6  | 1  | 2  | 4  | 9  | 8  | 7  | 3  | 5  |
| C07877 | 5  | 10 | 2  | 11 | 6  | 8  | 9  | 3  | 7  | 1  | 4  |
| C08423 | 10 | 9  | 5  | 3  | 7  | 4  | 8  | 1  | 11 | 2  | 6  |
| C08293 | 6  | 10 | 8  | 9  | 11 | 3  | 5  | 7  | 1  | 4  | 2  |
| C14409 | 11 | 3  | 1  | 2  | 9  | 8  | 5  | 6  | 7  | 10 | 4  |
| C02962 | 1  | 2  | 5  | 8  | 4  | 6  | 3  | 9  | 10 | 7  | 11 |
| C06905 | 5  | 10 | 11 | 3  | 9  | 1  | 8  | 2  | 7  | 6  | 4  |
| C10129 | 10 | 5  | 8  | 3  | 11 | 1  | 4  | 9  | 7  | 2  | 6  |
| C11002 | 11 | 10 | 9  | 5  | 7  | 3  | 1  | 6  | 8  | 4  | 2  |
| C10719 | 3  | 10 | 5  | 11 | 1  | 8  | 9  | 4  | 6  | 2  | 7  |
| C08680 | 9  | 10 | 1  | 11 | 4  | 8  | 5  | 3  | 2  | 7  | 6  |

|        |    |    |    |    |    |    |    |    |    |    |    |
|--------|----|----|----|----|----|----|----|----|----|----|----|
| C14608 | 3  | 10 | 2  | 7  | 11 | 1  | 8  | 5  | 4  | 9  | 6  |
| C09724 | 10 | 3  | 5  | 8  | 7  | 9  | 1  | 6  | 11 | 4  | 2  |
| C14562 | 11 | 2  | 4  | 5  | 6  | 10 | 3  | 8  | 9  | 1  | 7  |
| C08660 | 9  | 11 | 2  | 1  | 3  | 10 | 4  | 8  | 7  | 6  | 5  |
| C04102 | 3  | 11 | 5  | 6  | 1  | 4  | 10 | 7  | 8  | 9  | 2  |
| C09594 | 10 | 7  | 6  | 3  | 5  | 4  | 2  | 9  | 1  | 11 | 8  |
| C02227 | 11 | 5  | 2  | 3  | 4  | 8  | 9  | 1  | 6  | 7  | 10 |
| C14554 | 3  | 5  | 2  | 6  | 9  | 1  | 4  | 10 | 7  | 8  | 11 |
| C14642 | 3  | 9  | 10 | 1  | 8  | 2  | 6  | 5  | 11 | 4  | 7  |
| C01882 | 2  | 8  | 1  | 4  | 5  | 9  | 6  | 10 | 11 | 3  | 7  |
| C16250 | 4  | 11 | 2  | 1  | 8  | 5  | 3  | 6  | 10 | 9  | 7  |
| C14583 | 11 | 9  | 8  | 7  | 2  | 3  | 10 | 1  | 4  | 6  | 5  |
| C14510 | 11 | 2  | 5  | 6  | 8  | 1  | 9  | 10 | 7  | 3  | 4  |
| C14501 | 8  | 5  | 11 | 6  | 10 | 1  | 9  | 3  | 2  | 4  | 7  |
| C02674 | 1  | 4  | 2  | 5  | 8  | 6  | 11 | 10 | 3  | 7  | 9  |
| C14285 | 11 | 5  | 10 | 8  | 9  | 3  | 1  | 2  | 4  | 7  | 6  |
| C06997 | 3  | 11 | 10 | 8  | 1  | 5  | 9  | 7  | 6  | 2  | 4  |
| C11144 | 11 | 10 | 1  | 2  | 9  | 3  | 5  | 6  | 8  | 7  | 4  |
| C06842 | 3  | 5  | 10 | 8  | 11 | 1  | 2  | 7  | 4  | 9  | 6  |
| C03342 | 1  | 2  | 8  | 6  | 9  | 5  | 4  | 10 | 11 | 7  | 3  |
| C04534 | 1  | 2  | 10 | 9  | 8  | 6  | 5  | 4  | 11 | 7  | 3  |
| C06262 | 1  | 3  | 2  | 5  | 8  | 6  | 10 | 11 | 9  | 4  | 7  |
| C08909 | 1  | 3  | 4  | 10 | 6  | 5  | 11 | 8  | 7  | 9  | 2  |
| C10345 | 10 | 3  | 2  | 6  | 9  | 4  | 11 | 1  | 7  | 5  | 8  |
| C14602 | 11 | 1  | 5  | 2  | 10 | 7  | 6  | 9  | 3  | 8  | 4  |
| C08861 | 11 | 10 | 3  | 2  | 6  | 7  | 8  | 5  | 4  | 1  | 9  |
| C01012 | 8  | 6  | 1  | 2  | 4  | 11 | 5  | 7  | 3  | 10 | 9  |
| C09795 | 10 | 1  | 9  | 5  | 3  | 2  | 4  | 11 | 7  | 6  | 8  |
| C10701 | 10 | 5  | 11 | 3  | 7  | 4  | 8  | 2  | 1  | 6  | 9  |
| C12053 | 5  | 6  | 9  | 10 | 11 | 8  | 1  | 3  | 2  | 7  | 4  |
| C09341 | 6  | 5  | 2  | 4  | 9  | 1  | 11 | 3  | 8  | 10 | 7  |
| C03592 | 4  | 5  | 9  | 8  | 6  | 11 | 10 | 1  | 7  | 3  | 2  |
| C09133 | 10 | 5  | 9  | 7  | 11 | 4  | 8  | 6  | 3  | 2  | 1  |
| C07514 | 5  | 10 | 11 | 6  | 8  | 1  | 3  | 2  | 4  | 9  | 7  |
| C10350 | 5  | 10 | 6  | 3  | 2  | 11 | 4  | 7  | 8  | 1  | 9  |
| C15481 | 1  | 10 | 7  | 2  | 11 | 5  | 4  | 9  | 3  | 8  | 6  |
| C14662 | 6  | 2  | 10 | 11 | 8  | 9  | 4  | 3  | 5  | 1  | 7  |
| C14241 | 10 | 4  | 5  | 2  | 7  | 3  | 6  | 9  | 11 | 8  | 1  |
| C01205 | 4  | 6  | 5  | 8  | 1  | 2  | 11 | 10 | 9  | 7  | 3  |
| C04318 | 5  | 9  | 11 | 8  | 2  | 1  | 6  | 3  | 10 | 4  | 7  |
| C12327 | 10 | 8  | 11 | 1  | 4  | 7  | 3  | 6  | 9  | 2  | 5  |
| C03969 | 5  | 10 | 6  | 2  | 8  | 1  | 9  | 4  | 7  | 3  | 11 |
| C13683 | 10 | 8  | 6  | 4  | 5  | 2  | 11 | 7  | 9  | 3  | 1  |

|        |    |    |    |    |    |    |    |    |    |    |    |
|--------|----|----|----|----|----|----|----|----|----|----|----|
| C06979 | 10 | 9  | 11 | 4  | 5  | 6  | 8  | 7  | 3  | 1  | 2  |
| C14291 | 11 | 10 | 9  | 2  | 5  | 1  | 3  | 6  | 7  | 8  | 4  |
| C08437 | 1  | 6  | 10 | 5  | 2  | 9  | 3  | 11 | 7  | 8  | 4  |
| C10377 | 8  | 9  | 2  | 11 | 10 | 5  | 7  | 3  | 6  | 1  | 4  |
| C08333 | 6  | 1  | 3  | 9  | 5  | 10 | 11 | 4  | 8  | 7  | 2  |
| C14528 | 11 | 3  | 5  | 4  | 2  | 8  | 9  | 10 | 7  | 6  | 1  |
| C14527 | 11 | 1  | 3  | 2  | 5  | 7  | 10 | 8  | 9  | 6  | 4  |
| C14577 | 11 | 4  | 9  | 8  | 10 | 3  | 1  | 2  | 6  | 5  | 7  |
| C10493 | 9  | 4  | 8  | 2  | 10 | 7  | 3  | 1  | 11 | 6  | 5  |
| C15608 | 10 | 1  | 11 | 5  | 8  | 2  | 3  | 9  | 7  | 6  | 4  |
| C03187 | 1  | 10 | 9  | 2  | 4  | 8  | 6  | 3  | 5  | 7  | 11 |
| C08536 | 10 | 11 | 9  | 5  | 2  | 8  | 1  | 6  | 3  | 4  | 7  |
| C09285 | 10 | 11 | 9  | 1  | 6  | 3  | 8  | 4  | 2  | 5  | 7  |
| C14223 | 3  | 6  | 10 | 11 | 8  | 2  | 5  | 7  | 1  | 4  | 9  |
| C01289 | 1  | 9  | 7  | 4  | 10 | 3  | 5  | 6  | 8  | 11 | 2  |
| C08366 | 3  | 8  | 11 | 6  | 4  | 1  | 2  | 5  | 9  | 10 | 7  |
| C01725 | 1  | 6  | 5  | 8  | 3  | 7  | 11 | 4  | 9  | 10 | 2  |
| C03629 | 2  | 4  | 1  | 8  | 3  | 6  | 10 | 7  | 5  | 9  | 11 |
| C10477 | 10 | 5  | 11 | 3  | 8  | 2  | 7  | 1  | 9  | 4  | 6  |
| C10078 | 10 | 3  | 11 | 5  | 2  | 8  | 9  | 4  | 1  | 7  | 6  |
| C14302 | 11 | 6  | 10 | 3  | 9  | 5  | 1  | 2  | 4  | 8  | 7  |
| C02845 | 11 | 1  | 6  | 5  | 3  | 9  | 2  | 10 | 8  | 4  | 7  |
| C00248 | 2  | 8  | 5  | 6  | 1  | 11 | 3  | 4  | 9  | 10 | 7  |
| C06474 | 1  | 2  | 5  | 4  | 10 | 8  | 3  | 11 | 7  | 6  | 9  |
| C10834 | 10 | 11 | 5  | 1  | 2  | 7  | 8  | 3  | 6  | 4  | 9  |
| C01842 | 2  | 6  | 8  | 4  | 5  | 3  | 11 | 10 | 7  | 1  | 9  |
| C08234 | 9  | 8  | 1  | 11 | 7  | 4  | 2  | 5  | 3  | 10 | 6  |
| C13877 | 3  | 9  | 5  | 1  | 10 | 7  | 6  | 4  | 11 | 8  | 2  |
| C09080 | 10 | 1  | 7  | 9  | 2  | 3  | 5  | 8  | 4  | 11 | 6  |
| C03775 | 3  | 2  | 8  | 6  | 9  | 11 | 5  | 1  | 10 | 4  | 7  |
| C14366 | 11 | 2  | 7  | 6  | 5  | 8  | 3  | 10 | 9  | 1  | 4  |
| C15527 | 8  | 5  | 9  | 2  | 1  | 6  | 10 | 3  | 11 | 7  | 4  |
| C10438 | 10 | 5  | 11 | 2  | 8  | 9  | 1  | 6  | 3  | 4  | 7  |
| C14154 | 8  | 9  | 10 | 5  | 11 | 1  | 2  | 4  | 3  | 6  | 7  |
| C14677 | 11 | 3  | 8  | 5  | 7  | 1  | 4  | 9  | 2  | 6  | 10 |
| C11228 | 3  | 11 | 9  | 10 | 2  | 6  | 4  | 7  | 1  | 8  | 5  |
| C03998 | 5  | 6  | 2  | 1  | 9  | 11 | 10 | 3  | 4  | 7  | 8  |
| C06355 | 2  | 6  | 8  | 5  | 3  | 1  | 11 | 9  | 4  | 7  | 10 |
| C02234 | 11 | 8  | 6  | 5  | 2  | 10 | 9  | 3  | 1  | 4  | 7  |
| C10382 | 11 | 4  | 6  | 8  | 7  | 2  | 9  | 3  | 10 | 5  | 1  |
| C01394 | 1  | 2  | 8  | 5  | 4  | 6  | 11 | 10 | 9  | 7  | 3  |
| C03927 | 9  | 2  | 11 | 8  | 6  | 5  | 10 | 1  | 7  | 3  | 4  |
| C07599 | 5  | 4  | 10 | 6  | 2  | 11 | 8  | 9  | 1  | 7  | 3  |

|        |    |    |    |    |    |    |    |    |    |    |    |
|--------|----|----|----|----|----|----|----|----|----|----|----|
| C05308 | 9  | 2  | 8  | 5  | 4  | 6  | 3  | 1  | 11 | 7  | 10 |
| C14351 | 8  | 2  | 10 | 5  | 1  | 9  | 3  | 6  | 11 | 7  | 4  |
| C13235 | 5  | 10 | 4  | 3  | 2  | 1  | 8  | 11 | 6  | 7  | 9  |
| C14692 | 11 | 4  | 5  | 6  | 2  | 7  | 1  | 9  | 3  | 8  | 10 |
| C03485 | 11 | 1  | 5  | 9  | 2  | 10 | 8  | 3  | 6  | 4  | 7  |
| C04875 | 6  | 2  | 8  | 5  | 9  | 10 | 3  | 11 | 4  | 7  | 1  |
| C07941 | 10 | 5  | 11 | 7  | 4  | 8  | 1  | 3  | 2  | 6  | 9  |
| C10829 | 5  | 11 | 7  | 8  | 9  | 3  | 6  | 1  | 10 | 4  | 2  |
| C10543 | 10 | 11 | 9  | 5  | 2  | 8  | 7  | 4  | 3  | 6  | 1  |
| C09786 | 10 | 11 | 5  | 2  | 6  | 7  | 9  | 4  | 3  | 8  | 1  |
| C08504 | 6  | 3  | 10 | 4  | 1  | 8  | 2  | 9  | 11 | 5  | 7  |
| C01581 | 1  | 2  | 7  | 4  | 9  | 10 | 3  | 8  | 6  | 5  | 11 |
| C01474 | 9  | 4  | 1  | 11 | 8  | 3  | 10 | 6  | 2  | 5  | 7  |
| C08284 | 5  | 8  | 10 | 6  | 1  | 7  | 3  | 9  | 2  | 11 | 4  |
| C14459 | 11 | 1  | 6  | 2  | 9  | 10 | 3  | 7  | 4  | 5  | 8  |
| C02884 | 10 | 4  | 9  | 2  | 1  | 6  | 11 | 8  | 3  | 5  | 7  |
| C08430 | 1  | 10 | 6  | 5  | 4  | 9  | 8  | 11 | 3  | 2  | 7  |
| C16489 | 1  | 10 | 7  | 11 | 8  | 9  | 4  | 3  | 5  | 6  | 2  |
| C10021 | 11 | 10 | 3  | 5  | 1  | 9  | 6  | 2  | 8  | 7  | 4  |
| C07510 | 10 | 5  | 3  | 6  | 2  | 8  | 4  | 1  | 11 | 9  | 7  |
| C13782 | 10 | 5  | 3  | 11 | 2  | 8  | 9  | 1  | 7  | 6  | 4  |
| C08005 | 10 | 11 | 5  | 1  | 2  | 6  | 4  | 3  | 8  | 9  | 7  |
| C13143 | 10 | 9  | 5  | 11 | 8  | 6  | 1  | 3  | 2  | 4  | 7  |
| C06853 | 10 | 5  | 2  | 9  | 1  | 6  | 8  | 7  | 3  | 11 | 4  |
| C08371 | 5  | 2  | 1  | 9  | 11 | 3  | 6  | 10 | 4  | 7  | 8  |
| C00397 | 10 | 9  | 1  | 5  | 8  | 3  | 4  | 6  | 11 | 2  | 7  |
| C15571 | 11 | 10 | 5  | 1  | 8  | 2  | 3  | 6  | 9  | 4  | 7  |
| C15627 | 3  | 8  | 1  | 9  | 10 | 5  | 2  | 4  | 6  | 11 | 7  |
| C07927 | 11 | 10 | 3  | 9  | 6  | 7  | 1  | 4  | 8  | 2  | 5  |
| C10896 | 11 | 10 | 9  | 3  | 2  | 6  | 5  | 8  | 1  | 4  | 7  |
| C08528 | 10 | 5  | 8  | 6  | 4  | 2  | 3  | 7  | 1  | 11 | 9  |
| C04050 | 11 | 8  | 2  | 4  | 5  | 1  | 10 | 7  | 6  | 9  | 3  |
| C04255 | 1  | 2  | 10 | 5  | 4  | 8  | 7  | 3  | 9  | 11 | 6  |
| C07966 | 9  | 3  | 8  | 5  | 2  | 1  | 11 | 10 | 6  | 4  | 7  |
| C09471 | 9  | 4  | 7  | 5  | 6  | 11 | 2  | 3  | 8  | 10 | 1  |
| C06803 | 10 | 5  | 4  | 1  | 3  | 2  | 9  | 11 | 7  | 8  | 6  |
| C08108 | 10 | 9  | 6  | 5  | 8  | 4  | 7  | 2  | 3  | 1  | 11 |
| C01988 | 11 | 2  | 8  | 5  | 6  | 9  | 1  | 10 | 3  | 4  | 7  |
| C07999 | 9  | 10 | 5  | 11 | 1  | 6  | 2  | 8  | 3  | 7  | 4  |
| C01342 | 5  | 1  | 2  | 8  | 11 | 4  | 6  | 10 | 3  | 9  | 7  |
| C10672 | 10 | 11 | 1  | 6  | 2  | 9  | 3  | 8  | 7  | 5  | 4  |
| C03965 | 3  | 10 | 9  | 2  | 6  | 5  | 1  | 8  | 7  | 11 | 4  |
| C06464 | 1  | 2  | 10 | 5  | 6  | 8  | 3  | 4  | 11 | 9  | 7  |

|        |    |    |    |    |    |    |    |    |    |    |    |
|--------|----|----|----|----|----|----|----|----|----|----|----|
| C07290 | 2  | 8  | 6  | 10 | 7  | 3  | 11 | 5  | 1  | 4  | 9  |
| C09238 | 10 | 3  | 5  | 4  | 8  | 7  | 9  | 1  | 11 | 6  | 2  |
| C01864 | 8  | 2  | 5  | 11 | 6  | 10 | 9  | 4  | 3  | 1  | 7  |
| C14452 | 2  | 11 | 3  | 5  | 10 | 6  | 1  | 9  | 4  | 8  | 7  |
| C12298 | 9  | 11 | 5  | 1  | 3  | 2  | 10 | 8  | 4  | 6  | 7  |
| C14029 | 5  | 11 | 10 | 9  | 8  | 7  | 6  | 3  | 4  | 1  | 2  |
| C07455 | 5  | 3  | 2  | 6  | 10 | 8  | 4  | 11 | 1  | 9  | 7  |
| C11227 | 5  | 4  | 9  | 2  | 11 | 10 | 6  | 3  | 1  | 8  | 7  |
| C06917 | 3  | 11 | 1  | 4  | 10 | 6  | 2  | 5  | 7  | 9  | 8  |
| C09979 | 2  | 10 | 11 | 5  | 8  | 1  | 6  | 4  | 3  | 7  | 9  |
| C11058 | 11 | 9  | 6  | 10 | 8  | 3  | 5  | 1  | 4  | 7  | 2  |
| C11917 | 9  | 2  | 6  | 1  | 4  | 8  | 11 | 5  | 3  | 7  | 10 |
| C07410 | 10 | 5  | 11 | 2  | 4  | 3  | 6  | 9  | 1  | 7  | 8  |
| C06463 | 1  | 2  | 8  | 5  | 3  | 10 | 6  | 7  | 9  | 11 | 4  |
| C08521 | 10 | 11 | 2  | 4  | 9  | 3  | 8  | 6  | 5  | 1  | 7  |
| C10729 | 10 | 1  | 9  | 8  | 7  | 11 | 5  | 6  | 3  | 2  | 4  |
| C01970 | 1  | 2  | 3  | 5  | 8  | 9  | 6  | 4  | 10 | 11 | 7  |
| C14515 | 11 | 1  | 5  | 3  | 8  | 4  | 2  | 6  | 9  | 10 | 7  |
| C11804 | 5  | 10 | 8  | 6  | 9  | 7  | 4  | 3  | 2  | 1  | 11 |
| C02001 | 11 | 2  | 1  | 6  | 9  | 8  | 3  | 10 | 7  | 5  | 4  |
| C11116 | 5  | 11 | 8  | 9  | 7  | 4  | 10 | 3  | 2  | 1  | 6  |
| C10046 | 10 | 5  | 1  | 9  | 3  | 2  | 11 | 6  | 7  | 8  | 4  |
| C11073 | 11 | 9  | 8  | 2  | 1  | 4  | 3  | 5  | 10 | 7  | 6  |
| C12112 | 1  | 9  | 4  | 3  | 2  | 7  | 5  | 6  | 11 | 8  | 10 |
| C14078 | 6  | 5  | 1  | 8  | 2  | 4  | 11 | 9  | 10 | 7  | 3  |
| C11299 | 9  | 3  | 8  | 5  | 6  | 1  | 2  | 11 | 4  | 7  | 10 |
| C02267 | 4  | 9  | 11 | 5  | 10 | 2  | 1  | 8  | 3  | 6  | 7  |
| C09712 | 9  | 10 | 5  | 3  | 11 | 2  | 7  | 8  | 1  | 4  | 6  |
| C09042 | 5  | 10 | 4  | 11 | 9  | 3  | 2  | 7  | 8  | 6  | 1  |
| C12041 | 11 | 5  | 1  | 7  | 8  | 6  | 3  | 2  | 4  | 9  | 10 |
| C02328 | 1  | 9  | 10 | 5  | 11 | 3  | 8  | 7  | 2  | 6  | 4  |
| C07544 | 5  | 10 | 3  | 11 | 2  | 9  | 7  | 4  | 1  | 8  | 6  |
| C01854 | 10 | 1  | 9  | 11 | 4  | 7  | 5  | 3  | 6  | 2  | 8  |
| C07474 | 10 | 5  | 1  | 6  | 8  | 11 | 3  | 2  | 4  | 9  | 7  |
| C14299 | 11 | 6  | 9  | 2  | 8  | 10 | 4  | 3  | 7  | 1  | 5  |
| C07616 | 3  | 11 | 2  | 9  | 5  | 4  | 8  | 10 | 1  | 7  | 6  |
| C02774 | 2  | 11 | 3  | 5  | 8  | 10 | 1  | 9  | 4  | 6  | 7  |
| C07195 | 4  | 1  | 2  | 5  | 8  | 10 | 6  | 9  | 3  | 11 | 7  |
| C10236 | 10 | 11 | 1  | 5  | 3  | 2  | 8  | 6  | 4  | 9  | 7  |
| C01748 | 6  | 4  | 5  | 8  | 2  | 9  | 11 | 7  | 1  | 3  | 10 |
| C06332 | 2  | 11 | 5  | 8  | 10 | 9  | 3  | 4  | 1  | 6  | 7  |
| C02213 | 2  | 8  | 9  | 5  | 11 | 4  | 3  | 1  | 10 | 6  | 7  |
| C08228 | 10 | 5  | 11 | 6  | 8  | 9  | 1  | 3  | 4  | 7  | 2  |

|        |    |    |    |    |    |    |    |    |    |    |    |
|--------|----|----|----|----|----|----|----|----|----|----|----|
| C01551 | 4  | 5  | 2  | 8  | 1  | 6  | 11 | 10 | 9  | 3  | 7  |
| C15226 | 8  | 5  | 7  | 4  | 2  | 3  | 9  | 10 | 1  | 11 | 6  |
| C03349 | 5  | 6  | 10 | 11 | 1  | 2  | 8  | 4  | 3  | 9  | 7  |
| C10358 | 3  | 11 | 6  | 5  | 10 | 7  | 9  | 8  | 1  | 4  | 2  |
| C00994 | 5  | 10 | 6  | 2  | 1  | 9  | 8  | 4  | 11 | 3  | 7  |
| C07166 | 5  | 6  | 1  | 8  | 10 | 2  | 9  | 4  | 3  | 7  | 11 |
| C12256 | 5  | 1  | 11 | 7  | 10 | 4  | 9  | 3  | 6  | 8  | 2  |
| C15710 | 10 | 11 | 6  | 5  | 4  | 7  | 2  | 9  | 3  | 1  | 8  |
| C05403 | 1  | 5  | 8  | 2  | 6  | 9  | 10 | 7  | 3  | 11 | 4  |
| C09146 | 5  | 10 | 1  | 11 | 9  | 2  | 3  | 6  | 7  | 4  | 8  |
| C14163 | 11 | 9  | 8  | 5  | 4  | 1  | 3  | 7  | 6  | 2  | 10 |
| C04300 | 3  | 1  | 9  | 4  | 7  | 10 | 11 | 8  | 2  | 5  | 6  |
| C08288 | 5  | 6  | 10 | 8  | 4  | 9  | 7  | 2  | 11 | 3  | 1  |
| C09467 | 10 | 11 | 1  | 3  | 2  | 6  | 7  | 5  | 8  | 9  | 4  |
| C09364 | 5  | 6  | 10 | 8  | 1  | 11 | 3  | 2  | 4  | 9  | 7  |
| C10911 | 11 | 6  | 8  | 4  | 2  | 5  | 1  | 9  | 3  | 7  | 10 |
| C08599 | 9  | 8  | 3  | 10 | 2  | 7  | 6  | 11 | 1  | 4  | 5  |
| C10105 | 10 | 8  | 1  | 5  | 11 | 6  | 9  | 2  | 4  | 7  | 3  |
| C15512 | 2  | 8  | 11 | 5  | 9  | 3  | 1  | 7  | 4  | 10 | 6  |
| C01337 | 4  | 2  | 1  | 10 | 9  | 7  | 8  | 5  | 6  | 3  | 11 |
| C02780 | 1  | 2  | 6  | 8  | 3  | 10 | 9  | 7  | 11 | 4  | 5  |
| C07610 | 10 | 8  | 5  | 1  | 9  | 6  | 11 | 3  | 2  | 4  | 7  |
| C12627 | 10 | 9  | 5  | 6  | 1  | 3  | 2  | 8  | 11 | 4  | 7  |
| C04221 | 11 | 3  | 8  | 2  | 6  | 10 | 1  | 5  | 9  | 7  | 4  |
| C02214 | 1  | 11 | 5  | 2  | 6  | 3  | 9  | 7  | 8  | 4  | 10 |
| C02241 | 4  | 9  | 7  | 1  | 2  | 5  | 8  | 3  | 6  | 10 | 11 |
| C06953 | 4  | 11 | 2  | 5  | 6  | 1  | 9  | 10 | 8  | 7  | 3  |
| C07618 | 3  | 11 | 9  | 2  | 10 | 7  | 6  | 1  | 4  | 8  | 5  |
| C11649 | 9  | 2  | 8  | 5  | 1  | 6  | 4  | 3  | 10 | 11 | 7  |
| C10927 | 11 | 1  | 8  | 10 | 9  | 2  | 3  | 4  | 7  | 6  | 5  |
| C10861 | 10 | 2  | 8  | 11 | 4  | 3  | 1  | 9  | 6  | 5  | 7  |
| C14523 | 1  | 3  | 11 | 10 | 9  | 7  | 5  | 6  | 2  | 8  | 4  |
| C14658 | 3  | 1  | 4  | 5  | 7  | 6  | 2  | 11 | 8  | 10 | 9  |
| C08386 | 8  | 5  | 11 | 3  | 9  | 7  | 4  | 1  | 2  | 10 | 6  |
| C09896 | 9  | 1  | 7  | 4  | 11 | 3  | 6  | 10 | 2  | 5  | 8  |
| C01540 | 9  | 10 | 4  | 2  | 3  | 11 | 8  | 5  | 7  | 1  | 6  |
| C13880 | 11 | 8  | 3  | 4  | 6  | 10 | 2  | 5  | 1  | 7  | 9  |
| C10399 | 10 | 7  | 6  | 5  | 1  | 3  | 4  | 9  | 8  | 11 | 2  |
| C14288 | 11 | 5  | 4  | 9  | 8  | 3  | 6  | 7  | 10 | 2  | 1  |
| C06911 | 9  | 4  | 5  | 11 | 8  | 1  | 2  | 10 | 3  | 6  | 7  |
| C10964 | 10 | 5  | 11 | 4  | 3  | 1  | 8  | 2  | 6  | 7  | 9  |
| C01443 | 1  | 5  | 10 | 6  | 2  | 3  | 4  | 9  | 8  | 11 | 7  |
| C02661 | 11 | 2  | 8  | 10 | 5  | 1  | 6  | 3  | 7  | 9  | 4  |

|        |    |    |    |    |    |    |    |    |    |    |    |
|--------|----|----|----|----|----|----|----|----|----|----|----|
| C03172 | 5  | 2  | 8  | 6  | 3  | 1  | 9  | 4  | 11 | 10 | 7  |
| C06846 | 10 | 5  | 11 | 7  | 8  | 3  | 9  | 2  | 6  | 4  | 1  |
| C11367 | 8  | 6  | 2  | 9  | 4  | 3  | 7  | 10 | 11 | 1  | 5  |
| C07631 | 4  | 11 | 9  | 8  | 2  | 10 | 5  | 1  | 7  | 3  | 6  |
| C14598 | 3  | 6  | 1  | 5  | 7  | 9  | 10 | 11 | 4  | 2  | 8  |
| C07889 | 5  | 3  | 10 | 1  | 4  | 2  | 8  | 7  | 11 | 9  | 6  |
| C14496 | 3  | 2  | 10 | 11 | 5  | 1  | 6  | 4  | 7  | 9  | 8  |
| C11615 | 9  | 10 | 7  | 2  | 11 | 3  | 4  | 6  | 8  | 5  | 1  |
| C07674 | 1  | 11 | 5  | 2  | 4  | 9  | 8  | 6  | 10 | 7  | 3  |
| C02197 | 3  | 11 | 5  | 7  | 9  | 6  | 1  | 2  | 8  | 4  | 10 |
| C11740 | 5  | 8  | 1  | 10 | 3  | 2  | 11 | 7  | 9  | 4  | 6  |
| C06765 | 9  | 1  | 7  | 10 | 11 | 8  | 5  | 2  | 6  | 3  | 4  |
| C04033 | 6  | 2  | 5  | 8  | 3  | 1  | 11 | 9  | 4  | 10 | 7  |
| C07892 | 9  | 3  | 1  | 4  | 2  | 8  | 11 | 7  | 6  | 5  | 10 |
| C09201 | 10 | 2  | 5  | 1  | 7  | 9  | 3  | 8  | 6  | 11 | 4  |
| C09839 | 9  | 11 | 8  | 2  | 10 | 3  | 5  | 4  | 6  | 1  | 7  |
| C01714 | 10 | 1  | 9  | 4  | 3  | 11 | 5  | 2  | 8  | 7  | 6  |
| C10068 | 10 | 6  | 4  | 2  | 1  | 9  | 8  | 3  | 5  | 11 | 7  |
| C14233 | 11 | 5  | 10 | 7  | 8  | 2  | 6  | 3  | 9  | 1  | 4  |
| C08277 | 5  | 1  | 3  | 2  | 8  | 11 | 4  | 6  | 9  | 7  | 10 |
| C13846 | 3  | 11 | 8  | 9  | 5  | 10 | 7  | 2  | 4  | 1  | 6  |
| C15362 | 3  | 2  | 5  | 8  | 6  | 7  | 4  | 10 | 1  | 11 | 9  |
| C08029 | 9  | 1  | 10 | 11 | 6  | 7  | 2  | 5  | 3  | 8  | 4  |
| C02233 | 1  | 6  | 5  | 3  | 9  | 2  | 4  | 11 | 10 | 8  | 7  |
| C09618 | 10 | 3  | 9  | 11 | 1  | 4  | 6  | 5  | 8  | 2  | 7  |
| C11258 | 2  | 11 | 3  | 1  | 10 | 4  | 7  | 9  | 8  | 5  | 6  |
| C01018 | 1  | 2  | 5  | 10 | 3  | 6  | 8  | 9  | 4  | 11 | 7  |
| C14297 | 11 | 5  | 8  | 6  | 3  | 1  | 10 | 4  | 2  | 9  | 7  |
| C01616 | 2  | 8  | 6  | 5  | 1  | 9  | 11 | 3  | 7  | 4  | 10 |
| C06869 | 10 | 1  | 9  | 5  | 6  | 2  | 8  | 11 | 4  | 7  | 3  |
| C05151 | 3  | 10 | 1  | 11 | 4  | 5  | 2  | 6  | 9  | 8  | 7  |
| C10929 | 3  | 1  | 4  | 7  | 8  | 11 | 6  | 5  | 2  | 10 | 9  |
| C07886 | 5  | 10 | 4  | 3  | 2  | 1  | 9  | 7  | 6  | 11 | 8  |
| C11842 | 2  | 5  | 1  | 3  | 7  | 6  | 10 | 8  | 9  | 11 | 4  |
| C10613 | 5  | 2  | 6  | 8  | 9  | 7  | 10 | 3  | 11 | 1  | 4  |
| C14624 | 3  | 1  | 8  | 11 | 7  | 6  | 5  | 9  | 2  | 4  | 10 |
| C07639 | 2  | 5  | 6  | 4  | 1  | 7  | 8  | 3  | 11 | 9  | 10 |
| C08182 | 4  | 10 | 2  | 11 | 1  | 7  | 6  | 9  | 3  | 8  | 5  |
| C03953 | 1  | 2  | 7  | 10 | 4  | 5  | 3  | 6  | 8  | 11 | 9  |
| C06189 | 2  | 1  | 7  | 9  | 5  | 11 | 6  | 3  | 8  | 10 | 4  |
| C12317 | 5  | 1  | 6  | 2  | 8  | 10 | 9  | 4  | 3  | 11 | 7  |
| C01558 | 3  | 8  | 2  | 1  | 9  | 6  | 5  | 4  | 11 | 10 | 7  |
| C09510 | 4  | 6  | 11 | 2  | 10 | 8  | 7  | 5  | 1  | 3  | 9  |



|        |    |    |    |    |    |    |    |    |    |    |    |
|--------|----|----|----|----|----|----|----|----|----|----|----|
| C04164 | 1  | 10 | 9  | 4  | 5  | 3  | 11 | 8  | 6  | 2  | 7  |
| C13804 | 3  | 5  | 6  | 1  | 7  | 2  | 8  | 4  | 11 | 10 | 9  |
| C07172 | 9  | 11 | 10 | 5  | 3  | 2  | 6  | 1  | 8  | 7  | 4  |
| C14581 | 11 | 2  | 8  | 4  | 10 | 6  | 3  | 9  | 1  | 5  | 7  |
| C09316 | 3  | 1  | 9  | 7  | 10 | 11 | 5  | 2  | 8  | 4  | 6  |
| C15453 | 11 | 4  | 9  | 7  | 8  | 6  | 1  | 3  | 2  | 5  | 10 |
| C09663 | 9  | 3  | 10 | 1  | 4  | 7  | 2  | 11 | 8  | 6  | 5  |
| C15339 | 3  | 1  | 2  | 7  | 10 | 6  | 8  | 9  | 11 | 4  | 5  |
| C03509 | 1  | 2  | 4  | 8  | 5  | 9  | 3  | 7  | 6  | 10 | 11 |
| C04861 | 1  | 7  | 9  | 4  | 10 | 2  | 11 | 3  | 6  | 5  | 8  |
| C09311 | 10 | 3  | 11 | 8  | 1  | 5  | 6  | 4  | 2  | 9  | 7  |
| C09553 | 10 | 2  | 9  | 1  | 11 | 7  | 6  | 3  | 5  | 4  | 8  |
| C14456 | 11 | 2  | 8  | 6  | 5  | 1  | 4  | 10 | 7  | 3  | 9  |
| C01239 | 2  | 8  | 5  | 6  | 1  | 11 | 9  | 7  | 3  | 10 | 4  |
| C05116 | 3  | 1  | 2  | 5  | 11 | 9  | 6  | 8  | 7  | 10 | 4  |
| C06827 | 10 | 9  | 3  | 6  | 4  | 5  | 8  | 7  | 1  | 11 | 2  |
| C14499 | 11 | 3  | 1  | 10 | 5  | 4  | 9  | 6  | 7  | 8  | 2  |
| C08263 | 5  | 1  | 9  | 10 | 4  | 8  | 6  | 11 | 3  | 2  | 7  |
| C08368 | 3  | 1  | 8  | 11 | 4  | 6  | 10 | 7  | 9  | 2  | 5  |
| C08749 | 10 | 9  | 5  | 11 | 3  | 4  | 1  | 7  | 8  | 6  | 2  |
| C06324 | 8  | 2  | 11 | 5  | 4  | 7  | 3  | 1  | 6  | 9  | 10 |
| C03183 | 5  | 10 | 8  | 6  | 4  | 2  | 3  | 9  | 11 | 7  | 1  |
| C07651 | 5  | 2  | 6  | 8  | 11 | 9  | 10 | 4  | 7  | 1  | 3  |
| C10113 | 10 | 8  | 11 | 5  | 2  | 3  | 6  | 9  | 7  | 4  | 1  |
| C09691 | 9  | 3  | 10 | 11 | 5  | 8  | 2  | 6  | 7  | 1  | 4  |
| C06943 | 5  | 10 | 11 | 2  | 3  | 8  | 6  | 4  | 1  | 9  | 7  |
| C13931 | 6  | 8  | 5  | 1  | 2  | 10 | 11 | 4  | 9  | 3  | 7  |
| C09053 | 10 | 9  | 2  | 7  | 1  | 5  | 8  | 3  | 6  | 4  | 11 |
| C12979 | 11 | 8  | 5  | 3  | 10 | 9  | 2  | 4  | 1  | 7  | 6  |
| C13416 | 3  | 11 | 4  | 5  | 2  | 9  | 8  | 10 | 7  | 6  | 1  |
| C10535 | 10 | 2  | 5  | 4  | 1  | 6  | 3  | 9  | 8  | 7  | 11 |
| C15296 | 6  | 11 | 5  | 8  | 2  | 1  | 4  | 3  | 10 | 7  | 9  |
| C09197 | 10 | 5  | 6  | 4  | 2  | 9  | 3  | 11 | 7  | 1  | 8  |
| C11755 | 10 | 7  | 4  | 9  | 8  | 3  | 6  | 5  | 1  | 2  | 11 |
| C01608 | 3  | 1  | 10 | 9  | 8  | 5  | 11 | 4  | 6  | 2  | 7  |
| C02231 | 6  | 2  | 8  | 5  | 9  | 3  | 4  | 11 | 7  | 10 | 1  |
| C13373 | 1  | 2  | 8  | 6  | 11 | 5  | 4  | 9  | 7  | 3  | 10 |
| C00305 | 1  | 5  | 8  | 2  | 4  | 6  | 10 | 9  | 11 | 3  | 7  |
| C13881 | 1  | 5  | 2  | 8  | 6  | 10 | 4  | 9  | 3  | 7  | 11 |
| C10488 | 10 | 5  | 11 | 2  | 1  | 8  | 6  | 9  | 3  | 7  | 4  |
| C10901 | 10 | 2  | 11 | 5  | 8  | 6  | 9  | 1  | 7  | 3  | 4  |
| C10202 | 10 | 7  | 9  | 2  | 8  | 5  | 1  | 3  | 11 | 6  | 4  |
| C10092 | 3  | 1  | 6  | 2  | 10 | 11 | 5  | 8  | 9  | 4  | 7  |

|        |    |    |    |    |    |    |    |    |    |    |    |
|--------|----|----|----|----|----|----|----|----|----|----|----|
| C12177 | 9  | 4  | 5  | 10 | 8  | 2  | 7  | 11 | 3  | 6  | 1  |
| C07459 | 5  | 2  | 6  | 8  | 7  | 1  | 4  | 10 | 3  | 9  | 11 |
| C11535 | 1  | 2  | 8  | 11 | 6  | 4  | 9  | 5  | 3  | 10 | 7  |
| C08322 | 3  | 10 | 1  | 5  | 2  | 8  | 9  | 6  | 4  | 7  | 11 |
| C01410 | 11 | 1  | 2  | 9  | 10 | 7  | 3  | 6  | 4  | 8  | 5  |
| C08851 | 1  | 10 | 9  | 5  | 11 | 6  | 4  | 3  | 8  | 2  | 7  |
| C02648 | 2  | 8  | 6  | 4  | 5  | 3  | 1  | 7  | 10 | 11 | 9  |
| C11382 | 9  | 11 | 8  | 2  | 10 | 3  | 4  | 7  | 5  | 6  | 1  |
| C03622 | 2  | 8  | 1  | 11 | 4  | 6  | 7  | 5  | 9  | 3  | 10 |
| C10500 | 10 | 5  | 1  | 3  | 6  | 2  | 8  | 11 | 4  | 9  | 7  |
| C09258 | 10 | 11 | 5  | 7  | 4  | 6  | 9  | 8  | 3  | 1  | 2  |
| C09749 | 9  | 3  | 2  | 1  | 11 | 4  | 10 | 8  | 5  | 7  | 6  |
| C07139 | 10 | 9  | 5  | 6  | 1  | 4  | 8  | 7  | 2  | 3  | 11 |
| C00815 | 1  | 5  | 2  | 11 | 6  | 8  | 9  | 3  | 4  | 10 | 7  |
| C10022 | 10 | 1  | 11 | 7  | 8  | 5  | 3  | 9  | 6  | 2  | 4  |
| C08318 | 3  | 8  | 6  | 9  | 11 | 7  | 2  | 5  | 1  | 4  | 10 |
| C09887 | 9  | 10 | 2  | 4  | 3  | 1  | 8  | 11 | 5  | 7  | 6  |
| C01897 | 10 | 9  | 11 | 4  | 1  | 8  | 3  | 5  | 6  | 7  | 2  |
| C06770 | 10 | 9  | 11 | 4  | 1  | 2  | 8  | 5  | 3  | 6  | 7  |
| C06957 | 8  | 3  | 6  | 1  | 9  | 11 | 7  | 2  | 10 | 4  | 5  |
| C07182 | 1  | 5  | 2  | 6  | 8  | 10 | 4  | 11 | 3  | 9  | 7  |
| C03521 | 1  | 2  | 8  | 5  | 6  | 4  | 10 | 11 | 3  | 7  | 9  |
| C00797 | 2  | 5  | 11 | 10 | 6  | 8  | 4  | 1  | 9  | 3  | 7  |
| C04707 | 3  | 2  | 8  | 6  | 4  | 5  | 7  | 11 | 1  | 10 | 9  |
| C05344 | 1  | 6  | 8  | 2  | 7  | 10 | 5  | 9  | 4  | 11 | 3  |
| C02893 | 11 | 10 | 2  | 4  | 5  | 6  | 7  | 9  | 3  | 1  | 8  |
| C02983 | 5  | 2  | 10 | 8  | 9  | 11 | 3  | 6  | 1  | 4  | 7  |
| C11252 | 11 | 2  | 7  | 4  | 9  | 8  | 3  | 10 | 5  | 6  | 1  |
| C08482 | 3  | 9  | 5  | 1  | 10 | 11 | 4  | 6  | 7  | 2  | 8  |
| C08312 | 5  | 10 | 2  | 8  | 1  | 11 | 9  | 3  | 6  | 7  | 4  |
| C10913 | 4  | 5  | 11 | 10 | 1  | 8  | 3  | 6  | 7  | 9  | 2  |
| C08994 | 10 | 5  | 11 | 1  | 8  | 9  | 7  | 2  | 4  | 6  | 3  |
| C08157 | 3  | 9  | 11 | 1  | 10 | 4  | 2  | 7  | 8  | 6  | 5  |
| C13838 | 3  | 6  | 5  | 10 | 2  | 9  | 8  | 1  | 11 | 4  | 7  |
| C05771 | 8  | 2  | 5  | 4  | 11 | 3  | 6  | 9  | 1  | 7  | 10 |
| C07112 | 11 | 2  | 8  | 5  | 9  | 1  | 3  | 10 | 7  | 6  | 4  |
| C03404 | 4  | 5  | 2  | 3  | 7  | 8  | 10 | 11 | 6  | 9  | 1  |
| C07872 | 10 | 11 | 3  | 4  | 6  | 8  | 5  | 9  | 1  | 2  | 7  |
| C07004 | 3  | 5  | 10 | 2  | 7  | 6  | 1  | 11 | 8  | 4  | 9  |
| C02532 | 2  | 5  | 6  | 1  | 8  | 3  | 10 | 7  | 11 | 9  | 4  |
| C03174 | 5  | 2  | 1  | 8  | 11 | 6  | 9  | 7  | 10 | 3  | 4  |
| C06354 | 11 | 8  | 5  | 9  | 2  | 3  | 4  | 1  | 10 | 6  | 7  |
| C12226 | 10 | 11 | 4  | 9  | 7  | 8  | 3  | 2  | 1  | 6  | 5  |

|        |    |    |    |    |    |    |    |    |    |    |    |
|--------|----|----|----|----|----|----|----|----|----|----|----|
| C14603 | 3  | 4  | 6  | 9  | 11 | 8  | 7  | 2  | 10 | 1  | 5  |
| C01952 | 5  | 6  | 10 | 4  | 2  | 8  | 1  | 7  | 11 | 9  | 3  |
| C07364 | 9  | 10 | 11 | 4  | 3  | 8  | 7  | 6  | 2  | 1  | 5  |
| C02797 | 3  | 11 | 8  | 4  | 2  | 7  | 6  | 9  | 1  | 5  | 10 |
| C11304 | 10 | 9  | 4  | 6  | 2  | 5  | 7  | 1  | 3  | 8  | 11 |
| C09791 | 9  | 11 | 6  | 5  | 7  | 2  | 3  | 8  | 10 | 1  | 4  |
| C07627 | 8  | 1  | 6  | 2  | 5  | 11 | 10 | 9  | 3  | 7  | 4  |
| C11196 | 11 | 10 | 9  | 2  | 5  | 8  | 7  | 1  | 6  | 3  | 4  |
| C13392 | 11 | 10 | 9  | 3  | 5  | 6  | 7  | 1  | 8  | 2  | 4  |
| C02426 | 1  | 2  | 5  | 8  | 6  | 3  | 9  | 11 | 10 | 4  | 7  |
| C10307 | 11 | 4  | 2  | 3  | 5  | 10 | 9  | 1  | 6  | 7  | 8  |
| C03861 | 2  | 8  | 11 | 4  | 3  | 1  | 6  | 10 | 5  | 9  | 7  |
| C08507 | 11 | 6  | 2  | 10 | 8  | 1  | 4  | 7  | 3  | 5  | 9  |
| C06984 | 11 | 9  | 10 | 1  | 8  | 5  | 4  | 3  | 7  | 6  | 2  |
| C07612 | 3  | 1  | 11 | 10 | 7  | 2  | 9  | 6  | 5  | 8  | 4  |
| C07375 | 10 | 5  | 11 | 2  | 3  | 1  | 8  | 6  | 9  | 4  | 7  |
| C14618 | 3  | 4  | 10 | 6  | 5  | 2  | 9  | 1  | 11 | 8  | 7  |
| C08942 | 1  | 3  | 8  | 5  | 11 | 9  | 7  | 2  | 4  | 10 | 6  |
| C11170 | 10 | 9  | 6  | 5  | 8  | 4  | 2  | 3  | 7  | 1  | 11 |
| C09647 | 9  | 10 | 3  | 2  | 5  | 6  | 7  | 11 | 1  | 4  | 8  |
| C08356 | 1  | 2  | 5  | 6  | 8  | 3  | 10 | 11 | 9  | 4  | 7  |
| C11156 | 11 | 3  | 5  | 10 | 8  | 4  | 2  | 6  | 9  | 1  | 7  |
| C01047 | 2  | 10 | 6  | 8  | 9  | 4  | 5  | 1  | 7  | 11 | 3  |
| C10965 | 11 | 6  | 10 | 5  | 1  | 8  | 3  | 7  | 9  | 2  | 4  |
| C07144 | 5  | 10 | 2  | 11 | 7  | 6  | 8  | 3  | 9  | 1  | 4  |
| C03408 | 1  | 9  | 7  | 4  | 11 | 10 | 2  | 5  | 6  | 3  | 8  |
| C10390 | 11 | 10 | 8  | 5  | 2  | 6  | 1  | 9  | 3  | 7  | 4  |
| C14232 | 10 | 5  | 9  | 1  | 7  | 8  | 2  | 3  | 6  | 11 | 4  |
| C12165 | 10 | 9  | 8  | 1  | 2  | 3  | 7  | 4  | 5  | 11 | 6  |
| C09391 | 10 | 9  | 8  | 6  | 11 | 5  | 2  | 3  | 4  | 1  | 7  |
| C09309 | 10 | 1  | 9  | 2  | 5  | 4  | 8  | 6  | 3  | 11 | 7  |
| C10304 | 10 | 5  | 7  | 1  | 8  | 2  | 6  | 4  | 3  | 9  | 11 |
| C03600 | 1  | 11 | 8  | 5  | 3  | 2  | 9  | 4  | 7  | 6  | 10 |
| C03623 | 8  | 6  | 2  | 1  | 5  | 7  | 10 | 4  | 3  | 11 | 9  |
| C11778 | 10 | 11 | 1  | 7  | 5  | 3  | 8  | 6  | 9  | 4  | 2  |
| C07967 | 5  | 11 | 1  | 10 | 4  | 6  | 7  | 2  | 3  | 9  | 8  |
| C14569 | 2  | 5  | 4  | 11 | 8  | 3  | 1  | 7  | 6  | 9  | 10 |
| C07153 | 10 | 11 | 5  | 2  | 1  | 9  | 3  | 7  | 6  | 8  | 4  |
| C06068 | 10 | 5  | 11 | 9  | 4  | 1  | 3  | 2  | 6  | 7  | 8  |
| C11141 | 10 | 1  | 7  | 5  | 11 | 3  | 9  | 2  | 6  | 4  | 8  |
| C10047 | 10 | 2  | 7  | 1  | 4  | 9  | 11 | 8  | 6  | 3  | 5  |
| C08719 | 10 | 9  | 6  | 1  | 2  | 4  | 5  | 11 | 3  | 8  | 7  |
| C08816 | 9  | 3  | 6  | 10 | 2  | 7  | 8  | 5  | 11 | 4  | 1  |

|        |    |    |    |    |    |    |    |    |    |    |    |
|--------|----|----|----|----|----|----|----|----|----|----|----|
| C14224 | 11 | 3  | 1  | 10 | 8  | 5  | 4  | 9  | 2  | 6  | 7  |
| C13706 | 1  | 2  | 5  | 6  | 11 | 8  | 4  | 7  | 10 | 9  | 3  |
| C02660 | 9  | 6  | 11 | 5  | 8  | 10 | 4  | 3  | 7  | 2  | 1  |
| C12443 | 9  | 10 | 4  | 1  | 11 | 5  | 7  | 6  | 3  | 2  | 8  |
| C10873 | 3  | 5  | 9  | 2  | 6  | 10 | 7  | 4  | 11 | 1  | 8  |
| C09728 | 10 | 5  | 11 | 8  | 2  | 6  | 1  | 3  | 9  | 4  | 7  |
| C00841 | 2  | 8  | 5  | 6  | 10 | 9  | 3  | 11 | 7  | 1  | 4  |
| C12599 | 4  | 11 | 9  | 2  | 1  | 8  | 6  | 5  | 3  | 7  | 10 |
| C09982 | 10 | 2  | 1  | 11 | 4  | 3  | 6  | 9  | 7  | 8  | 5  |
| C06802 | 1  | 5  | 6  | 2  | 10 | 8  | 3  | 7  | 4  | 9  | 11 |
| C05425 | 3  | 8  | 9  | 5  | 10 | 6  | 11 | 2  | 4  | 7  | 1  |
| C14471 | 11 | 6  | 2  | 4  | 10 | 1  | 7  | 3  | 8  | 5  | 9  |
| C10374 | 11 | 5  | 1  | 9  | 8  | 4  | 2  | 3  | 10 | 6  | 7  |
| C15689 | 11 | 8  | 10 | 5  | 9  | 6  | 4  | 3  | 7  | 1  | 2  |
| C07449 | 5  | 10 | 3  | 6  | 4  | 2  | 1  | 7  | 11 | 9  | 8  |
| C07778 | 5  | 3  | 9  | 11 | 10 | 8  | 4  | 6  | 1  | 7  | 2  |
| C01349 | 3  | 10 | 5  | 6  | 4  | 9  | 2  | 11 | 7  | 1  | 8  |
| C06726 | 8  | 2  | 9  | 1  | 4  | 10 | 6  | 3  | 11 | 5  | 7  |
| C09654 | 10 | 9  | 11 | 6  | 4  | 5  | 8  | 3  | 7  | 2  | 1  |
| C14434 | 11 | 10 | 1  | 3  | 5  | 6  | 7  | 8  | 4  | 9  | 2  |
| C09350 | 9  | 11 | 3  | 7  | 4  | 8  | 2  | 1  | 10 | 5  | 6  |
| C10676 | 10 | 3  | 9  | 11 | 5  | 2  | 4  | 8  | 1  | 7  | 6  |
| C09271 | 1  | 10 | 5  | 6  | 9  | 2  | 4  | 7  | 3  | 8  | 11 |
| C03124 | 2  | 5  | 6  | 4  | 7  | 3  | 8  | 9  | 1  | 10 | 11 |
| C11359 | 10 | 8  | 5  | 1  | 9  | 3  | 4  | 2  | 7  | 6  | 11 |
| C02569 | 9  | 2  | 8  | 3  | 5  | 4  | 11 | 1  | 7  | 10 | 6  |
| C08117 | 10 | 6  | 5  | 11 | 9  | 3  | 1  | 8  | 7  | 2  | 4  |
| C08148 | 1  | 3  | 11 | 5  | 9  | 6  | 10 | 2  | 8  | 4  | 7  |
| C07774 | 5  | 10 | 3  | 11 | 9  | 7  | 6  | 4  | 2  | 8  | 1  |
| C10805 | 11 | 5  | 9  | 1  | 2  | 10 | 3  | 4  | 8  | 7  | 6  |
| C09465 | 10 | 6  | 11 | 9  | 7  | 8  | 2  | 1  | 3  | 4  | 5  |
| C02077 | 5  | 2  | 1  | 11 | 6  | 8  | 10 | 3  | 4  | 7  | 9  |
| C04692 | 5  | 9  | 11 | 7  | 10 | 2  | 6  | 3  | 1  | 4  | 8  |
| C09589 | 10 | 7  | 5  | 8  | 3  | 6  | 11 | 4  | 9  | 2  | 1  |
| C15752 | 2  | 5  | 7  | 8  | 3  | 6  | 1  | 4  | 10 | 9  | 11 |
| C00758 | 2  | 8  | 5  | 6  | 9  | 10 | 11 | 7  | 3  | 1  | 4  |
| C10663 | 10 | 5  | 3  | 7  | 9  | 8  | 6  | 11 | 1  | 2  | 4  |
| C14355 | 11 | 8  | 2  | 4  | 3  | 7  | 10 | 1  | 9  | 6  | 5  |
| C11106 | 11 | 2  | 9  | 1  | 10 | 8  | 6  | 3  | 5  | 7  | 4  |
| C08470 | 9  | 11 | 1  | 2  | 6  | 4  | 10 | 3  | 8  | 7  | 5  |
| C07320 | 3  | 1  | 5  | 9  | 11 | 10 | 8  | 6  | 7  | 2  | 4  |
| C03137 | 5  | 3  | 10 | 8  | 11 | 2  | 9  | 6  | 1  | 4  | 7  |
| C13888 | 8  | 1  | 9  | 6  | 2  | 4  | 10 | 3  | 11 | 5  | 7  |

|        |    |    |    |    |    |    |    |    |    |    |    |
|--------|----|----|----|----|----|----|----|----|----|----|----|
| C09523 | 8  | 7  | 6  | 5  | 2  | 1  | 4  | 11 | 3  | 10 | 9  |
| C09005 | 11 | 4  | 1  | 8  | 6  | 7  | 5  | 9  | 10 | 3  | 2  |
| C09885 | 9  | 11 | 10 | 5  | 1  | 4  | 8  | 7  | 3  | 6  | 2  |
| C03184 | 8  | 2  | 5  | 11 | 7  | 1  | 3  | 4  | 6  | 10 | 9  |
| C02692 | 1  | 2  | 6  | 8  | 10 | 3  | 11 | 5  | 4  | 9  | 7  |
| C14437 | 5  | 11 | 3  | 10 | 9  | 1  | 6  | 8  | 7  | 2  | 4  |
| C07504 | 11 | 5  | 8  | 10 | 6  | 9  | 1  | 4  | 2  | 7  | 3  |
| C13929 | 11 | 7  | 8  | 9  | 1  | 5  | 3  | 4  | 10 | 2  | 6  |
| C14539 | 9  | 10 | 7  | 11 | 8  | 5  | 2  | 1  | 3  | 4  | 6  |
| C08309 | 5  | 10 | 11 | 1  | 4  | 9  | 6  | 2  | 3  | 8  | 7  |
| C08419 | 10 | 5  | 6  | 1  | 3  | 2  | 8  | 9  | 11 | 7  | 4  |
| C06471 | 1  | 9  | 7  | 10 | 2  | 6  | 4  | 8  | 11 | 3  | 5  |
| C12119 | 5  | 8  | 6  | 9  | 7  | 2  | 4  | 10 | 1  | 3  | 11 |
| C10579 | 9  | 3  | 11 | 5  | 1  | 8  | 2  | 4  | 10 | 7  | 6  |
| C02903 | 6  | 5  | 8  | 2  | 1  | 10 | 11 | 4  | 9  | 7  | 3  |
| C06244 | 1  | 2  | 11 | 6  | 5  | 3  | 4  | 9  | 10 | 7  | 8  |
| C03994 | 11 | 5  | 10 | 6  | 4  | 7  | 3  | 8  | 1  | 9  | 2  |
| C11786 | 11 | 10 | 4  | 9  | 3  | 8  | 1  | 5  | 7  | 6  | 2  |
| C13938 | 10 | 3  | 9  | 7  | 5  | 4  | 11 | 6  | 2  | 1  | 8  |
| C10586 | 10 | 5  | 11 | 6  | 2  | 1  | 9  | 7  | 3  | 8  | 4  |
| C08053 | 10 | 9  | 5  | 2  | 11 | 8  | 4  | 7  | 3  | 1  | 6  |
| C06887 | 10 | 9  | 1  | 2  | 6  | 5  | 11 | 4  | 8  | 3  | 7  |
| C08027 | 10 | 8  | 11 | 1  | 5  | 2  | 9  | 6  | 3  | 4  | 7  |
| C14728 | 3  | 11 | 10 | 4  | 9  | 8  | 1  | 7  | 6  | 5  | 2  |
| C14406 | 11 | 8  | 10 | 2  | 5  | 4  | 1  | 6  | 3  | 7  | 9  |
| C03068 | 11 | 2  | 8  | 3  | 6  | 10 | 1  | 4  | 5  | 9  | 7  |
| C10238 | 10 | 11 | 1  | 5  | 3  | 4  | 9  | 6  | 7  | 8  | 2  |
| C09457 | 10 | 11 | 3  | 2  | 1  | 7  | 8  | 9  | 4  | 6  | 5  |
| C11705 | 3  | 5  | 11 | 9  | 1  | 7  | 2  | 8  | 10 | 4  | 6  |
| C11158 | 9  | 8  | 11 | 10 | 4  | 3  | 2  | 5  | 6  | 1  | 7  |
| C07345 | 8  | 2  | 5  | 3  | 6  | 1  | 11 | 10 | 4  | 9  | 7  |
| C07708 | 1  | 5  | 4  | 7  | 9  | 2  | 11 | 6  | 3  | 10 | 8  |
| C14763 | 10 | 6  | 4  | 3  | 1  | 5  | 9  | 2  | 7  | 11 | 8  |
| C10241 | 11 | 1  | 9  | 8  | 3  | 6  | 5  | 10 | 7  | 2  | 4  |
| C14512 | 11 | 10 | 5  | 1  | 8  | 2  | 3  | 9  | 6  | 4  | 7  |
| C14381 | 11 | 5  | 2  | 10 | 6  | 8  | 1  | 7  | 9  | 3  | 4  |
| C12303 | 9  | 5  | 11 | 3  | 2  | 6  | 1  | 7  | 10 | 8  | 4  |
| C06477 | 1  | 2  | 11 | 3  | 8  | 9  | 4  | 5  | 10 | 6  | 7  |
| C10031 | 10 | 5  | 11 | 8  | 6  | 7  | 2  | 3  | 1  | 9  | 4  |
| C08608 | 2  | 8  | 5  | 9  | 11 | 6  | 1  | 7  | 3  | 10 | 4  |
| C08432 | 4  | 10 | 9  | 6  | 11 | 1  | 3  | 2  | 5  | 8  | 7  |
| C10961 | 11 | 6  | 2  | 10 | 1  | 8  | 4  | 5  | 3  | 9  | 7  |
| C13854 | 9  | 3  | 11 | 5  | 4  | 10 | 1  | 7  | 2  | 6  | 8  |

|        |    |    |    |    |    |    |    |    |    |    |    |
|--------|----|----|----|----|----|----|----|----|----|----|----|
| C10271 | 10 | 2  | 11 | 9  | 6  | 8  | 3  | 7  | 4  | 5  | 1  |
| C08124 | 10 | 9  | 2  | 4  | 7  | 3  | 8  | 6  | 11 | 1  | 5  |
| C16463 | 4  | 1  | 3  | 9  | 8  | 10 | 6  | 5  | 11 | 7  | 2  |
| C14235 | 11 | 2  | 7  | 5  | 9  | 3  | 4  | 6  | 1  | 10 | 8  |
| C07833 | 11 | 10 | 3  | 9  | 5  | 8  | 2  | 7  | 1  | 6  | 4  |
| C01740 | 11 | 2  | 6  | 3  | 5  | 4  | 8  | 10 | 1  | 9  | 7  |
| C09313 | 10 | 3  | 11 | 6  | 5  | 1  | 4  | 8  | 7  | 2  | 9  |
| C02735 | 5  | 11 | 10 | 9  | 3  | 8  | 1  | 2  | 7  | 6  | 4  |
| C14567 | 9  | 5  | 10 | 3  | 11 | 8  | 7  | 4  | 2  | 1  | 6  |
| C03996 | 8  | 1  | 9  | 4  | 3  | 10 | 7  | 5  | 2  | 11 | 6  |
| C12057 | 10 | 2  | 1  | 8  | 3  | 5  | 6  | 7  | 11 | 9  | 4  |
| C11033 | 5  | 2  | 3  | 6  | 10 | 7  | 11 | 8  | 9  | 4  | 1  |
| C15337 | 3  | 9  | 10 | 5  | 1  | 8  | 11 | 2  | 4  | 6  | 7  |
| C00982 | 2  | 4  | 8  | 7  | 1  | 5  | 11 | 6  | 3  | 10 | 9  |
| C06513 | 10 | 7  | 11 | 1  | 3  | 4  | 9  | 2  | 5  | 8  | 6  |
| C08998 | 4  | 11 | 1  | 6  | 2  | 5  | 10 | 9  | 3  | 7  | 8  |
| C06496 | 3  | 11 | 6  | 10 | 4  | 9  | 5  | 2  | 8  | 1  | 7  |
| C11698 | 5  | 11 | 7  | 4  | 8  | 3  | 10 | 2  | 6  | 9  | 1  |
| C12035 | 7  | 6  | 4  | 5  | 11 | 2  | 8  | 10 | 3  | 1  | 9  |
| C08385 | 3  | 1  | 8  | 5  | 7  | 11 | 2  | 9  | 4  | 10 | 6  |
| C06108 | 1  | 11 | 2  | 5  | 6  | 8  | 9  | 4  | 10 | 3  | 7  |
| C02555 | 4  | 2  | 7  | 8  | 10 | 9  | 5  | 3  | 1  | 6  | 11 |
| C05529 | 1  | 2  | 5  | 6  | 8  | 11 | 9  | 4  | 10 | 3  | 7  |
| C00318 | 5  | 3  | 8  | 1  | 2  | 6  | 11 | 9  | 4  | 10 | 7  |
| C07508 | 10 | 5  | 1  | 4  | 6  | 8  | 2  | 3  | 11 | 7  | 9  |
| C00774 | 10 | 1  | 3  | 2  | 5  | 11 | 8  | 6  | 9  | 4  | 7  |
| C15552 | 1  | 3  | 10 | 4  | 6  | 9  | 5  | 8  | 11 | 2  | 7  |
| C08342 | 1  | 6  | 10 | 11 | 8  | 3  | 7  | 4  | 2  | 5  | 9  |
| C11844 | 5  | 2  | 10 | 9  | 7  | 3  | 1  | 4  | 8  | 6  | 11 |
| C11674 | 1  | 3  | 9  | 5  | 4  | 11 | 6  | 2  | 10 | 8  | 7  |
| C07235 | 9  | 8  | 5  | 6  | 10 | 1  | 11 | 4  | 2  | 7  | 3  |
| C11219 | 3  | 11 | 8  | 2  | 5  | 10 | 7  | 4  | 6  | 1  | 9  |
| C08033 | 1  | 9  | 7  | 10 | 2  | 4  | 6  | 3  | 5  | 11 | 8  |
| C07789 | 10 | 5  | 3  | 9  | 11 | 6  | 4  | 1  | 2  | 8  | 7  |
| C08984 | 8  | 9  | 11 | 10 | 7  | 6  | 3  | 2  | 1  | 4  | 5  |
| C15494 | 2  | 8  | 5  | 11 | 1  | 10 | 3  | 4  | 6  | 7  | 9  |
| C14590 | 3  | 9  | 8  | 4  | 5  | 11 | 2  | 7  | 1  | 6  | 10 |
| C10912 | 9  | 11 | 2  | 10 | 7  | 1  | 8  | 3  | 6  | 4  | 5  |
| C09112 | 3  | 1  | 10 | 11 | 6  | 5  | 8  | 4  | 9  | 7  | 2  |
| C08980 | 3  | 1  | 10 | 11 | 8  | 4  | 2  | 5  | 9  | 7  | 6  |
| C09550 | 10 | 5  | 6  | 3  | 1  | 7  | 2  | 9  | 8  | 4  | 11 |
| C09925 | 10 | 2  | 5  | 8  | 1  | 3  | 9  | 6  | 7  | 11 | 4  |
| C08364 | 3  | 10 | 1  | 5  | 9  | 11 | 2  | 7  | 8  | 6  | 4  |

|        |    |    |    |    |    |    |    |    |    |    |    |
|--------|----|----|----|----|----|----|----|----|----|----|----|
| C07851 | 10 | 3  | 11 | 4  | 7  | 2  | 9  | 1  | 5  | 8  | 6  |
| C10823 | 5  | 1  | 11 | 7  | 6  | 3  | 10 | 9  | 4  | 8  | 2  |
| C11086 | 11 | 6  | 2  | 5  | 8  | 4  | 10 | 1  | 3  | 9  | 7  |
| C03712 | 6  | 5  | 3  | 8  | 11 | 1  | 7  | 2  | 4  | 10 | 9  |
| C06257 | 9  | 8  | 10 | 2  | 1  | 4  | 5  | 3  | 11 | 6  | 7  |
| C12202 | 9  | 10 | 8  | 4  | 7  | 5  | 3  | 11 | 6  | 2  | 1  |
| C07852 | 1  | 10 | 7  | 8  | 9  | 5  | 4  | 11 | 2  | 3  | 6  |
| C07373 | 8  | 3  | 5  | 9  | 10 | 6  | 1  | 11 | 2  | 4  | 7  |
| C16439 | 5  | 6  | 1  | 2  | 8  | 10 | 4  | 3  | 11 | 9  | 7  |
| C14716 | 11 | 5  | 2  | 9  | 7  | 10 | 3  | 8  | 1  | 4  | 6  |
| C10619 | 9  | 11 | 10 | 7  | 4  | 3  | 8  | 5  | 6  | 1  | 2  |
| C01135 | 1  | 2  | 4  | 9  | 10 | 8  | 3  | 7  | 6  | 5  | 11 |
| C03238 | 3  | 6  | 2  | 9  | 8  | 5  | 1  | 4  | 11 | 10 | 7  |
| C11798 | 5  | 3  | 10 | 1  | 6  | 4  | 2  | 11 | 8  | 9  | 7  |
| C09796 | 10 | 9  | 11 | 1  | 5  | 4  | 2  | 3  | 7  | 8  | 6  |
| C14228 | 11 | 2  | 10 | 8  | 9  | 5  | 1  | 3  | 4  | 7  | 6  |
| C02979 | 1  | 2  | 3  | 7  | 8  | 10 | 11 | 9  | 5  | 6  | 4  |
| C08376 | 3  | 5  | 6  | 8  | 4  | 7  | 11 | 10 | 2  | 9  | 1  |
| C01495 | 10 | 1  | 5  | 11 | 8  | 9  | 3  | 2  | 4  | 6  | 7  |
| C01569 | 2  | 8  | 1  | 11 | 4  | 9  | 6  | 10 | 7  | 3  | 5  |
| C14292 | 9  | 11 | 5  | 10 | 3  | 8  | 6  | 7  | 1  | 2  | 4  |
| C10341 | 10 | 11 | 5  | 1  | 9  | 6  | 3  | 4  | 2  | 8  | 7  |
| C11362 | 5  | 2  | 8  | 4  | 10 | 6  | 3  | 11 | 1  | 9  | 7  |
| C10511 | 10 | 9  | 8  | 7  | 3  | 1  | 2  | 5  | 11 | 6  | 4  |
| C08279 | 5  | 11 | 1  | 9  | 10 | 8  | 3  | 6  | 4  | 7  | 2  |
| C07660 | 10 | 9  | 4  | 11 | 5  | 2  | 6  | 7  | 1  | 8  | 3  |
| C03884 | 5  | 3  | 6  | 10 | 2  | 4  | 8  | 9  | 1  | 11 | 7  |
| C10421 | 10 | 9  | 11 | 8  | 1  | 3  | 5  | 7  | 2  | 6  | 4  |
| C00772 | 8  | 9  | 3  | 2  | 6  | 1  | 11 | 5  | 10 | 7  | 4  |
| C08834 | 9  | 3  | 6  | 2  | 4  | 11 | 8  | 7  | 10 | 5  | 1  |
| C03524 | 3  | 1  | 2  | 11 | 6  | 9  | 5  | 8  | 7  | 4  | 10 |
| C07420 | 5  | 6  | 10 | 1  | 9  | 4  | 2  | 11 | 8  | 3  | 7  |
| C09763 | 10 | 2  | 7  | 5  | 6  | 3  | 4  | 8  | 9  | 11 | 1  |
| C02150 | 2  | 11 | 1  | 6  | 3  | 10 | 5  | 7  | 9  | 8  | 4  |
| C00220 | 3  | 1  | 8  | 2  | 4  | 11 | 5  | 7  | 9  | 10 | 6  |
| C09278 | 2  | 8  | 6  | 10 | 3  | 1  | 5  | 9  | 11 | 4  | 7  |
| C14474 | 9  | 10 | 4  | 1  | 11 | 5  | 3  | 8  | 6  | 2  | 7  |
| C04275 | 1  | 10 | 6  | 4  | 7  | 2  | 5  | 3  | 11 | 8  | 9  |
| C03750 | 2  | 6  | 8  | 4  | 5  | 10 | 1  | 3  | 11 | 7  | 9  |
| C14468 | 3  | 11 | 5  | 2  | 4  | 9  | 8  | 6  | 1  | 10 | 7  |
| C08136 | 1  | 3  | 11 | 2  | 4  | 10 | 5  | 7  | 9  | 8  | 6  |
| C03204 | 2  | 8  | 4  | 9  | 5  | 10 | 11 | 1  | 7  | 6  | 3  |
| C14442 | 11 | 10 | 9  | 2  | 3  | 1  | 6  | 5  | 8  | 7  | 4  |

|        |    |    |    |    |    |    |    |    |    |    |    |
|--------|----|----|----|----|----|----|----|----|----|----|----|
| C14472 | 1  | 11 | 2  | 10 | 7  | 8  | 4  | 5  | 3  | 6  | 9  |
| C02788 | 3  | 2  | 6  | 8  | 7  | 1  | 9  | 5  | 11 | 4  | 10 |
| C14331 | 11 | 5  | 1  | 10 | 3  | 6  | 8  | 2  | 4  | 9  | 7  |
| C12290 | 9  | 11 | 5  | 1  | 3  | 6  | 2  | 10 | 7  | 8  | 4  |
| C02088 | 10 | 9  | 5  | 2  | 11 | 6  | 3  | 8  | 1  | 4  | 7  |
| C04187 | 2  | 4  | 9  | 10 | 6  | 5  | 3  | 8  | 1  | 11 | 7  |
| C09440 | 3  | 1  | 4  | 7  | 5  | 11 | 6  | 2  | 8  | 10 | 9  |
| C07269 | 5  | 3  | 2  | 10 | 6  | 4  | 8  | 1  | 11 | 9  | 7  |
| C09314 | 8  | 3  | 5  | 11 | 1  | 2  | 4  | 9  | 6  | 7  | 10 |
| C08836 | 3  | 10 | 9  | 1  | 8  | 11 | 2  | 5  | 4  | 6  | 7  |
| C08336 | 6  | 1  | 3  | 4  | 5  | 7  | 11 | 10 | 2  | 9  | 8  |
| C07332 | 1  | 11 | 5  | 10 | 7  | 4  | 3  | 9  | 8  | 2  | 6  |
| C11007 | 11 | 3  | 6  | 2  | 10 | 9  | 7  | 4  | 1  | 8  | 5  |
| C10914 | 11 | 1  | 5  | 10 | 6  | 7  | 3  | 4  | 9  | 2  | 8  |
| C05462 | 3  | 8  | 2  | 4  | 7  | 6  | 5  | 1  | 9  | 10 | 11 |
| C12059 | 1  | 11 | 5  | 2  | 10 | 8  | 3  | 4  | 9  | 6  | 7  |
| C08823 | 3  | 5  | 6  | 10 | 11 | 4  | 1  | 2  | 7  | 8  | 9  |
| C05347 | 2  | 1  | 6  | 5  | 11 | 7  | 8  | 10 | 4  | 3  | 9  |
| C11279 | 3  | 1  | 6  | 11 | 2  | 5  | 8  | 10 | 4  | 9  | 7  |
| C14509 | 9  | 11 | 3  | 1  | 5  | 10 | 6  | 2  | 8  | 7  | 4  |
| C12829 | 11 | 5  | 4  | 9  | 10 | 1  | 3  | 6  | 7  | 2  | 8  |
| C05372 | 3  | 10 | 5  | 4  | 2  | 6  | 1  | 11 | 8  | 7  | 9  |
| C05597 | 5  | 6  | 2  | 11 | 1  | 8  | 4  | 3  | 9  | 10 | 7  |
| C10575 | 5  | 10 | 1  | 8  | 4  | 9  | 3  | 2  | 11 | 6  | 7  |
| C10932 | 4  | 2  | 5  | 10 | 7  | 3  | 11 | 9  | 6  | 1  | 8  |
| C11317 | 3  | 1  | 11 | 10 | 2  | 9  | 5  | 8  | 4  | 6  | 7  |
| C08100 | 10 | 1  | 9  | 2  | 5  | 7  | 6  | 8  | 3  | 4  | 11 |
| C03072 | 3  | 8  | 9  | 10 | 2  | 6  | 5  | 1  | 4  | 11 | 7  |
| C15186 | 3  | 7  | 5  | 11 | 1  | 9  | 4  | 10 | 2  | 8  | 6  |
| C14007 | 10 | 9  | 8  | 6  | 5  | 7  | 11 | 1  | 3  | 2  | 4  |
| C09591 | 10 | 11 | 5  | 7  | 6  | 2  | 3  | 8  | 4  | 1  | 9  |
| C13662 | 3  | 1  | 5  | 10 | 8  | 4  | 6  | 7  | 11 | 9  | 2  |
| C05386 | 1  | 2  | 4  | 8  | 9  | 10 | 6  | 7  | 3  | 11 | 5  |
| C01722 | 1  | 2  | 5  | 8  | 6  | 10 | 3  | 11 | 9  | 4  | 7  |
| C06697 | 2  | 6  | 8  | 1  | 5  | 9  | 4  | 11 | 10 | 7  | 3  |
| C14229 | 11 | 6  | 1  | 5  | 10 | 2  | 8  | 4  | 3  | 7  | 9  |
| C11387 | 9  | 11 | 10 | 1  | 8  | 3  | 6  | 7  | 5  | 2  | 4  |
| C01601 | 3  | 11 | 1  | 9  | 5  | 8  | 6  | 10 | 2  | 4  | 7  |
| C10780 | 10 | 4  | 8  | 5  | 11 | 2  | 1  | 7  | 6  | 3  | 9  |
| C00557 | 2  | 8  | 3  | 11 | 6  | 5  | 1  | 10 | 9  | 4  | 7  |
| C08568 | 10 | 5  | 8  | 11 | 2  | 4  | 1  | 6  | 3  | 9  | 7  |
| C14201 | 11 | 5  | 3  | 8  | 9  | 4  | 1  | 6  | 10 | 2  | 7  |
| C08512 | 11 | 4  | 3  | 7  | 2  | 10 | 6  | 1  | 8  | 5  | 9  |



|        |    |    |    |    |    |    |    |    |    |    |    |
|--------|----|----|----|----|----|----|----|----|----|----|----|
| C10464 | 10 | 2  | 6  | 11 | 9  | 3  | 5  | 4  | 1  | 7  | 8  |
| C13749 | 10 | 5  | 2  | 4  | 11 | 8  | 6  | 9  | 7  | 1  | 3  |
| C15419 | 11 | 5  | 1  | 7  | 10 | 3  | 4  | 8  | 2  | 6  | 9  |
| C14729 | 1  | 5  | 10 | 8  | 11 | 6  | 4  | 9  | 2  | 3  | 7  |
| C10245 | 10 | 11 | 1  | 9  | 5  | 8  | 3  | 4  | 6  | 7  | 2  |
| C03195 | 3  | 8  | 2  | 11 | 4  | 10 | 6  | 1  | 7  | 5  | 9  |
| C14322 | 11 | 10 | 9  | 1  | 2  | 5  | 3  | 6  | 7  | 8  | 4  |
| C10478 | 9  | 5  | 10 | 11 | 2  | 7  | 1  | 3  | 6  | 8  | 4  |
| C14317 | 11 | 3  | 9  | 6  | 5  | 1  | 4  | 10 | 8  | 2  | 7  |
| C08498 | 9  | 11 | 5  | 6  | 3  | 1  | 10 | 4  | 8  | 7  | 2  |
| C12560 | 2  | 1  | 7  | 11 | 6  | 9  | 4  | 5  | 3  | 10 | 8  |
| C09835 | 3  | 1  | 2  | 9  | 6  | 7  | 11 | 10 | 4  | 5  | 8  |
| C07699 | 10 | 3  | 5  | 2  | 11 | 8  | 4  | 7  | 6  | 1  | 9  |
| C10359 | 10 | 8  | 11 | 7  | 9  | 3  | 5  | 1  | 4  | 6  | 2  |
| C14582 | 11 | 5  | 9  | 2  | 6  | 4  | 1  | 3  | 8  | 10 | 7  |
| C13198 | 2  | 8  | 11 | 1  | 3  | 5  | 10 | 4  | 7  | 9  | 6  |
| C13044 | 3  | 11 | 1  | 6  | 9  | 8  | 2  | 4  | 7  | 5  | 10 |
| C10235 | 1  | 10 | 9  | 7  | 2  | 3  | 5  | 8  | 6  | 4  | 11 |
| C11805 | 5  | 1  | 8  | 10 | 6  | 2  | 3  | 4  | 9  | 7  | 11 |
| C07841 | 11 | 5  | 10 | 3  | 1  | 6  | 4  | 8  | 7  | 9  | 2  |
| C15695 | 9  | 11 | 6  | 10 | 8  | 5  | 1  | 2  | 7  | 3  | 4  |
| C15649 | 3  | 9  | 2  | 1  | 8  | 6  | 11 | 7  | 4  | 10 | 5  |
| C06947 | 10 | 5  | 11 | 8  | 6  | 2  | 1  | 9  | 3  | 4  | 7  |
| C04645 | 1  | 4  | 9  | 2  | 7  | 3  | 8  | 10 | 6  | 11 | 5  |
| C12073 | 10 | 11 | 2  | 9  | 5  | 1  | 3  | 6  | 7  | 8  | 4  |
| C06890 | 10 | 9  | 5  | 6  | 1  | 2  | 3  | 8  | 4  | 11 | 7  |
| C08899 | 10 | 2  | 9  | 11 | 6  | 3  | 4  | 7  | 8  | 1  | 5  |
| C14257 | 3  | 6  | 2  | 1  | 10 | 5  | 4  | 8  | 11 | 7  | 9  |
| C12194 | 10 | 3  | 6  | 7  | 4  | 8  | 11 | 1  | 5  | 2  | 9  |
| C09419 | 10 | 3  | 5  | 4  | 1  | 11 | 9  | 2  | 8  | 7  | 6  |
| C01585 | 3  | 1  | 11 | 5  | 2  | 6  | 8  | 9  | 10 | 4  | 7  |
| C09317 | 10 | 9  | 5  | 11 | 7  | 8  | 2  | 3  | 6  | 4  | 1  |
| C08066 | 9  | 11 | 5  | 3  | 4  | 2  | 10 | 8  | 1  | 7  | 6  |
| C06228 | 8  | 9  | 10 | 2  | 11 | 7  | 5  | 4  | 3  | 1  | 6  |
| C11325 | 10 | 11 | 7  | 5  | 3  | 2  | 9  | 8  | 6  | 4  | 1  |
| C04503 | 4  | 2  | 9  | 10 | 7  | 11 | 8  | 6  | 1  | 3  | 5  |
| C13358 | 3  | 2  | 9  | 7  | 5  | 1  | 11 | 10 | 6  | 4  | 8  |
| C01710 | 11 | 8  | 2  | 3  | 10 | 1  | 6  | 4  | 7  | 9  | 5  |
| C10931 | 11 | 6  | 5  | 1  | 8  | 4  | 3  | 9  | 10 | 2  | 7  |
| C01119 | 2  | 1  | 8  | 6  | 5  | 11 | 3  | 9  | 7  | 4  | 10 |
| C10845 | 10 | 1  | 2  | 6  | 11 | 3  | 8  | 9  | 5  | 7  | 4  |
| C08663 | 9  | 6  | 11 | 2  | 4  | 7  | 3  | 1  | 8  | 5  | 10 |
| C03197 | 1  | 5  | 2  | 3  | 11 | 8  | 6  | 9  | 10 | 4  | 7  |

|        |    |    |    |    |    |    |    |    |    |    |    |
|--------|----|----|----|----|----|----|----|----|----|----|----|
| C09930 | 5  | 10 | 1  | 7  | 9  | 3  | 8  | 6  | 4  | 2  | 11 |
| C11155 | 10 | 8  | 11 | 5  | 6  | 1  | 3  | 2  | 9  | 4  | 7  |
| C13870 | 3  | 11 | 1  | 8  | 5  | 6  | 7  | 10 | 9  | 4  | 2  |
| C13587 | 1  | 3  | 10 | 5  | 8  | 7  | 11 | 9  | 6  | 2  | 4  |
| C07272 | 2  | 6  | 8  | 5  | 1  | 11 | 10 | 9  | 4  | 3  | 7  |
| C00756 | 11 | 2  | 9  | 1  | 5  | 3  | 8  | 10 | 6  | 4  | 7  |
| C10749 | 10 | 2  | 6  | 4  | 1  | 9  | 11 | 3  | 5  | 8  | 7  |
| C07051 | 2  | 1  | 7  | 3  | 4  | 6  | 9  | 5  | 8  | 11 | 10 |
| C13764 | 10 | 5  | 2  | 1  | 4  | 9  | 3  | 11 | 7  | 6  | 8  |
| C10183 | 10 | 3  | 8  | 1  | 4  | 7  | 11 | 5  | 2  | 6  | 9  |
| C15591 | 2  | 8  | 11 | 4  | 9  | 6  | 7  | 3  | 10 | 5  | 1  |
| C14578 | 11 | 4  | 2  | 7  | 1  | 9  | 5  | 3  | 8  | 10 | 6  |
| C15499 | 1  | 11 | 5  | 2  | 6  | 8  | 3  | 7  | 9  | 4  | 10 |
| C08402 | 11 | 8  | 6  | 3  | 5  | 9  | 7  | 4  | 2  | 1  | 10 |
| C03549 | 10 | 1  | 5  | 11 | 8  | 2  | 9  | 3  | 6  | 7  | 4  |
| C02766 | 4  | 5  | 2  | 11 | 10 | 6  | 1  | 8  | 3  | 9  | 7  |
| C01956 | 5  | 2  | 8  | 11 | 6  | 4  | 9  | 10 | 3  | 1  | 7  |
| C05282 | 8  | 11 | 5  | 1  | 3  | 10 | 2  | 4  | 6  | 9  | 7  |
| C11689 | 10 | 5  | 1  | 9  | 6  | 3  | 8  | 7  | 11 | 2  | 4  |
| C09345 | 9  | 11 | 4  | 10 | 8  | 2  | 7  | 3  | 5  | 6  | 1  |
| C07759 | 10 | 11 | 5  | 2  | 1  | 7  | 9  | 3  | 4  | 6  | 8  |
| C01550 | 11 | 2  | 10 | 5  | 7  | 6  | 4  | 8  | 3  | 1  | 9  |
| C06266 | 11 | 2  | 10 | 1  | 8  | 5  | 6  | 4  | 9  | 7  | 3  |
| C14550 | 11 | 3  | 10 | 8  | 5  | 1  | 9  | 4  | 2  | 7  | 6  |
| C04760 | 3  | 2  | 8  | 9  | 4  | 10 | 7  | 5  | 1  | 6  | 11 |
| C11370 | 9  | 1  | 8  | 2  | 7  | 11 | 5  | 4  | 3  | 10 | 6  |
| C08855 | 3  | 2  | 11 | 5  | 6  | 1  | 9  | 4  | 7  | 8  | 10 |
| C03241 | 2  | 8  | 6  | 11 | 10 | 3  | 1  | 4  | 7  | 5  | 9  |
| C13852 | 1  | 2  | 6  | 5  | 8  | 10 | 11 | 3  | 7  | 4  | 9  |
| C01857 | 2  | 5  | 1  | 3  | 9  | 11 | 6  | 8  | 7  | 10 | 4  |
| C08372 | 5  | 2  | 9  | 11 | 1  | 10 | 6  | 7  | 3  | 4  | 8  |
| C03268 | 1  | 9  | 4  | 7  | 3  | 8  | 2  | 10 | 5  | 11 | 6  |
| C14142 | 11 | 1  | 6  | 8  | 4  | 3  | 9  | 7  | 5  | 2  | 10 |
| C08074 | 3  | 11 | 5  | 9  | 6  | 8  | 4  | 1  | 10 | 2  | 7  |
| C10332 | 11 | 5  | 8  | 2  | 6  | 9  | 1  | 3  | 7  | 10 | 4  |
| C03476 | 2  | 8  | 4  | 5  | 1  | 9  | 7  | 10 | 11 | 6  | 3  |
| C10800 | 11 | 9  | 5  | 7  | 1  | 10 | 6  | 3  | 8  | 4  | 2  |
| C00806 | 5  | 6  | 2  | 8  | 10 | 1  | 9  | 11 | 4  | 3  | 7  |
| C14623 | 4  | 11 | 9  | 5  | 1  | 8  | 6  | 2  | 3  | 7  | 10 |
| C14641 | 3  | 1  | 8  | 9  | 6  | 7  | 4  | 11 | 5  | 2  | 10 |
| C10994 | 11 | 9  | 10 | 4  | 8  | 3  | 6  | 1  | 7  | 2  | 5  |
| C10051 | 10 | 11 | 5  | 9  | 7  | 2  | 3  | 1  | 8  | 6  | 4  |
| C07074 | 9  | 3  | 1  | 8  | 5  | 10 | 2  | 11 | 6  | 7  | 4  |

|        |    |    |    |    |    |    |    |    |    |    |    |
|--------|----|----|----|----|----|----|----|----|----|----|----|
| C12085 | 5  | 10 | 6  | 1  | 3  | 8  | 11 | 9  | 2  | 4  | 7  |
| C08677 | 9  | 10 | 2  | 1  | 6  | 3  | 8  | 11 | 4  | 7  | 5  |
| C09892 | 10 | 4  | 7  | 1  | 11 | 6  | 5  | 8  | 3  | 9  | 2  |
| C02345 | 10 | 5  | 11 | 2  | 8  | 3  | 4  | 1  | 7  | 6  | 9  |
| C13168 | 10 | 5  | 1  | 3  | 6  | 8  | 2  | 11 | 9  | 4  | 7  |
| C07537 | 11 | 10 | 3  | 8  | 2  | 9  | 6  | 1  | 4  | 5  | 7  |
| C02914 | 2  | 1  | 5  | 11 | 4  | 8  | 6  | 10 | 3  | 7  | 9  |
| C12540 | 9  | 10 | 1  | 2  | 5  | 11 | 3  | 7  | 6  | 8  | 4  |
| C15497 | 8  | 4  | 2  | 9  | 11 | 6  | 7  | 3  | 1  | 5  | 10 |
| C07597 | 8  | 9  | 1  | 11 | 4  | 2  | 7  | 5  | 3  | 10 | 6  |
| C07402 | 11 | 9  | 10 | 4  | 3  | 8  | 5  | 6  | 7  | 1  | 2  |
| C03503 | 9  | 1  | 4  | 3  | 2  | 11 | 6  | 5  | 7  | 8  | 10 |
| C07372 | 5  | 11 | 8  | 1  | 10 | 6  | 2  | 3  | 4  | 9  | 7  |
| C01906 | 2  | 9  | 4  | 1  | 10 | 8  | 11 | 6  | 5  | 3  | 7  |
| C14187 | 11 | 3  | 10 | 1  | 9  | 4  | 2  | 7  | 8  | 5  | 6  |
| C11201 | 10 | 9  | 11 | 8  | 6  | 3  | 7  | 2  | 5  | 1  | 4  |
| C14428 | 11 | 6  | 9  | 2  | 5  | 4  | 8  | 10 | 1  | 3  | 7  |
| C14312 | 11 | 2  | 3  | 1  | 10 | 5  | 7  | 4  | 6  | 8  | 9  |
| C10577 | 6  | 1  | 5  | 2  | 8  | 3  | 9  | 11 | 4  | 10 | 7  |
| C01075 | 1  | 2  | 4  | 5  | 8  | 7  | 10 | 11 | 3  | 9  | 6  |
| C04273 | 1  | 10 | 6  | 2  | 8  | 11 | 4  | 3  | 7  | 9  | 5  |
| C13964 | 1  | 10 | 6  | 9  | 2  | 7  | 5  | 11 | 3  | 8  | 4  |
| C11469 | 9  | 6  | 11 | 8  | 5  | 4  | 10 | 2  | 1  | 7  | 3  |
| C08854 | 3  | 2  | 11 | 9  | 1  | 6  | 5  | 7  | 8  | 4  | 10 |
| C01310 | 2  | 5  | 4  | 8  | 9  | 1  | 6  | 3  | 11 | 7  | 10 |
| C07467 | 1  | 5  | 11 | 3  | 4  | 9  | 8  | 10 | 7  | 6  | 2  |
| C09426 | 10 | 7  | 3  | 11 | 2  | 8  | 4  | 6  | 1  | 9  | 5  |
| C04015 | 1  | 3  | 5  | 2  | 9  | 11 | 6  | 8  | 7  | 10 | 4  |
| C06825 | 1  | 10 | 3  | 5  | 2  | 8  | 9  | 11 | 4  | 7  | 6  |
| C07407 | 10 | 5  | 3  | 1  | 4  | 9  | 11 | 8  | 2  | 6  | 7  |
| C02048 | 1  | 10 | 2  | 9  | 7  | 8  | 6  | 11 | 3  | 5  | 4  |
| C14183 | 1  | 2  | 4  | 5  | 11 | 10 | 9  | 7  | 6  | 8  | 3  |
| C10979 | 3  | 5  | 2  | 6  | 11 | 4  | 7  | 1  | 8  | 9  | 10 |
| C07006 | 3  | 1  | 10 | 4  | 6  | 8  | 2  | 7  | 9  | 11 | 5  |
| C13735 | 5  | 6  | 8  | 10 | 2  | 1  | 3  | 9  | 11 | 4  | 7  |
| C01630 | 1  | 11 | 9  | 10 | 4  | 8  | 2  | 7  | 5  | 3  | 6  |
| C00563 | 1  | 10 | 3  | 5  | 2  | 11 | 4  | 6  | 9  | 8  | 7  |
| C10699 | 10 | 2  | 4  | 1  | 8  | 6  | 9  | 5  | 7  | 3  | 11 |
| C09528 | 6  | 1  | 5  | 8  | 4  | 11 | 2  | 7  | 10 | 9  | 3  |
| C06075 | 9  | 8  | 3  | 2  | 11 | 10 | 1  | 5  | 6  | 7  | 4  |
| C08073 | 11 | 5  | 3  | 10 | 9  | 1  | 2  | 6  | 4  | 8  | 7  |
| C03031 | 4  | 7  | 8  | 2  | 3  | 5  | 9  | 6  | 10 | 1  | 11 |
| C08499 | 9  | 1  | 5  | 3  | 11 | 2  | 6  | 10 | 4  | 7  | 8  |

|        |    |    |    |    |    |    |    |    |    |    |    |
|--------|----|----|----|----|----|----|----|----|----|----|----|
| C14416 | 11 | 10 | 5  | 2  | 1  | 8  | 9  | 6  | 3  | 7  | 4  |
| C03243 | 11 | 3  | 8  | 5  | 1  | 2  | 6  | 10 | 4  | 9  | 7  |
| C11011 | 11 | 3  | 9  | 8  | 4  | 2  | 10 | 6  | 1  | 7  | 5  |
| C10063 | 1  | 2  | 11 | 9  | 8  | 6  | 3  | 7  | 5  | 4  | 10 |
| C03829 | 5  | 6  | 2  | 1  | 8  | 4  | 10 | 9  | 11 | 7  | 3  |
| C07531 | 11 | 10 | 5  | 2  | 9  | 3  | 6  | 7  | 4  | 8  | 1  |
| C08628 | 10 | 3  | 11 | 9  | 1  | 2  | 5  | 8  | 6  | 7  | 4  |
| C11720 | 3  | 2  | 5  | 8  | 6  | 4  | 9  | 7  | 11 | 10 | 1  |
| C03142 | 4  | 1  | 9  | 3  | 8  | 5  | 2  | 6  | 7  | 11 | 10 |
| C10541 | 10 | 3  | 5  | 11 | 8  | 6  | 2  | 9  | 1  | 4  | 7  |
| C08727 | 10 | 1  | 9  | 11 | 5  | 2  | 7  | 8  | 6  | 4  | 3  |
| C11010 | 11 | 1  | 8  | 5  | 9  | 4  | 3  | 6  | 2  | 10 | 7  |
| C10410 | 10 | 2  | 11 | 3  | 9  | 7  | 1  | 6  | 4  | 5  | 8  |
| C03413 | 5  | 6  | 10 | 11 | 8  | 4  | 2  | 1  | 7  | 3  | 9  |
| C11314 | 11 | 1  | 2  | 5  | 10 | 9  | 4  | 3  | 8  | 6  | 7  |
| C09473 | 10 | 5  | 9  | 6  | 3  | 2  | 8  | 7  | 1  | 4  | 11 |
| C12063 | 1  | 10 | 7  | 9  | 4  | 2  | 3  | 6  | 5  | 11 | 8  |
| C03844 | 1  | 10 | 2  | 5  | 8  | 6  | 9  | 3  | 11 | 7  | 4  |
| C08947 | 1  | 3  | 5  | 6  | 11 | 9  | 8  | 7  | 2  | 4  | 10 |
| C00764 | 1  | 2  | 5  | 6  | 8  | 3  | 10 | 11 | 9  | 4  | 7  |
| C02126 | 11 | 2  | 5  | 8  | 10 | 6  | 4  | 1  | 3  | 9  | 7  |
| C12896 | 5  | 3  | 1  | 9  | 2  | 8  | 4  | 10 | 6  | 11 | 7  |
| C09697 | 10 | 5  | 11 | 7  | 3  | 6  | 8  | 1  | 4  | 9  | 2  |
| C10494 | 11 | 10 | 8  | 9  | 4  | 5  | 3  | 6  | 7  | 2  | 1  |
| C09541 | 10 | 11 | 8  | 1  | 7  | 3  | 6  | 9  | 4  | 2  | 5  |
| C08193 | 6  | 5  | 2  | 1  | 11 | 8  | 9  | 10 | 7  | 3  | 4  |
| C03274 | 3  | 8  | 1  | 7  | 9  | 5  | 11 | 10 | 4  | 6  | 2  |
| C08311 | 5  | 10 | 1  | 6  | 3  | 8  | 2  | 11 | 4  | 9  | 7  |
| C06238 | 1  | 4  | 9  | 2  | 10 | 3  | 7  | 8  | 6  | 5  | 11 |
| C15216 | 3  | 11 | 5  | 4  | 1  | 6  | 8  | 2  | 10 | 9  | 7  |
| C09237 | 10 | 7  | 5  | 6  | 11 | 3  | 9  | 8  | 1  | 4  | 2  |
| C07251 | 10 | 11 | 5  | 2  | 4  | 1  | 6  | 9  | 7  | 3  | 8  |
| C05149 | 3  | 9  | 10 | 2  | 4  | 8  | 1  | 7  | 5  | 6  | 11 |
| C12853 | 9  | 2  | 5  | 4  | 10 | 6  | 8  | 3  | 11 | 1  | 7  |
| C09861 | 9  | 2  | 11 | 1  | 6  | 8  | 3  | 5  | 7  | 10 | 4  |
| C09289 | 9  | 10 | 6  | 2  | 1  | 4  | 11 | 3  | 8  | 7  | 5  |
| C09279 | 10 | 3  | 1  | 2  | 7  | 8  | 6  | 5  | 11 | 4  | 9  |
| C08603 | 9  | 8  | 6  | 10 | 5  | 4  | 1  | 7  | 3  | 11 | 2  |
| C10325 | 9  | 11 | 7  | 6  | 5  | 8  | 2  | 3  | 4  | 10 | 1  |
| C07151 | 3  | 1  | 5  | 4  | 2  | 9  | 8  | 11 | 10 | 6  | 7  |
| C10465 | 8  | 5  | 11 | 10 | 7  | 1  | 3  | 2  | 4  | 6  | 9  |
| C04621 | 3  | 11 | 8  | 10 | 9  | 5  | 2  | 6  | 4  | 1  | 7  |
| C10989 | 11 | 1  | 2  | 6  | 5  | 10 | 8  | 4  | 9  | 7  | 3  |

|        |    |    |    |    |    |    |    |    |    |    |    |
|--------|----|----|----|----|----|----|----|----|----|----|----|
| C07414 | 5  | 10 | 11 | 6  | 1  | 3  | 8  | 2  | 9  | 7  | 4  |
| C14655 | 3  | 4  | 7  | 1  | 2  | 5  | 11 | 9  | 10 | 6  | 8  |
| C08775 | 1  | 10 | 3  | 11 | 2  | 4  | 9  | 8  | 5  | 6  | 7  |
| C11772 | 5  | 10 | 11 | 4  | 3  | 8  | 6  | 1  | 7  | 9  | 2  |
| C08505 | 2  | 1  | 8  | 7  | 11 | 3  | 9  | 6  | 4  | 5  | 10 |
| C00076 | 1  | 5  | 3  | 2  | 8  | 4  | 6  | 10 | 11 | 9  | 7  |
| C04864 | 2  | 4  | 8  | 5  | 1  | 9  | 7  | 3  | 11 | 6  | 10 |
| C13427 | 11 | 8  | 9  | 5  | 1  | 3  | 4  | 10 | 6  | 7  | 2  |
| C11339 | 2  | 1  | 6  | 5  | 10 | 11 | 4  | 8  | 7  | 9  | 3  |
| C12012 | 9  | 10 | 11 | 4  | 6  | 3  | 5  | 8  | 1  | 2  | 7  |
| C09743 | 9  | 1  | 5  | 6  | 4  | 8  | 11 | 3  | 2  | 10 | 7  |
| C01553 | 11 | 10 | 9  | 4  | 6  | 2  | 7  | 5  | 3  | 8  | 1  |
| C07591 | 10 | 11 | 3  | 8  | 5  | 9  | 2  | 6  | 7  | 1  | 4  |
| C11265 | 4  | 5  | 11 | 9  | 1  | 10 | 6  | 7  | 3  | 2  | 8  |
| C15640 | 9  | 1  | 6  | 11 | 8  | 2  | 4  | 3  | 7  | 5  | 10 |
| C14200 | 11 | 3  | 5  | 10 | 8  | 7  | 1  | 6  | 4  | 9  | 2  |
| C09386 | 11 | 10 | 2  | 1  | 3  | 5  | 9  | 8  | 7  | 4  | 6  |
| C07586 | 3  | 1  | 5  | 8  | 10 | 9  | 2  | 4  | 6  | 7  | 11 |
| C07199 | 5  | 10 | 3  | 8  | 11 | 6  | 1  | 2  | 4  | 9  | 7  |
| C09504 | 10 | 5  | 9  | 6  | 3  | 2  | 8  | 7  | 1  | 4  | 11 |
| C11274 | 2  | 11 | 10 | 4  | 5  | 1  | 6  | 9  | 8  | 7  | 3  |
| C03047 | 5  | 6  | 8  | 10 | 2  | 4  | 11 | 1  | 3  | 7  | 9  |
| C14530 | 11 | 1  | 2  | 3  | 7  | 5  | 9  | 6  | 10 | 8  | 4  |
| C09015 | 3  | 5  | 10 | 7  | 6  | 2  | 11 | 1  | 9  | 4  | 8  |
| C08717 | 10 | 1  | 4  | 6  | 11 | 3  | 8  | 9  | 2  | 7  | 5  |
| C14514 | 11 | 8  | 7  | 5  | 4  | 3  | 1  | 2  | 10 | 6  | 9  |
| C09134 | 10 | 11 | 9  | 3  | 1  | 6  | 8  | 4  | 5  | 2  | 7  |
| C11319 | 11 | 5  | 9  | 7  | 1  | 2  | 3  | 10 | 4  | 6  | 8  |
| C12225 | 11 | 2  | 6  | 5  | 8  | 3  | 4  | 10 | 9  | 1  | 7  |
| C04379 | 2  | 8  | 6  | 5  | 11 | 9  | 3  | 4  | 1  | 10 | 7  |
| C15416 | 3  | 6  | 2  | 10 | 8  | 7  | 11 | 5  | 9  | 4  | 1  |
| C00742 | 1  | 2  | 11 | 6  | 8  | 5  | 3  | 4  | 10 | 7  | 9  |
| C02064 | 3  | 6  | 1  | 2  | 5  | 9  | 11 | 4  | 8  | 10 | 7  |
| C14408 | 11 | 1  | 2  | 4  | 9  | 10 | 6  | 7  | 3  | 8  | 5  |
| C10109 | 1  | 9  | 11 | 6  | 7  | 10 | 2  | 3  | 5  | 4  | 8  |
| C11229 | 2  | 3  | 10 | 6  | 8  | 4  | 1  | 11 | 5  | 7  | 9  |
| C04208 | 5  | 9  | 10 | 11 | 8  | 2  | 6  | 4  | 7  | 3  | 1  |
| C11234 | 9  | 10 | 1  | 2  | 8  | 7  | 6  | 5  | 3  | 4  | 11 |
| C02854 | 2  | 6  | 11 | 1  | 4  | 3  | 8  | 7  | 5  | 9  | 10 |
| C15306 | 3  | 1  | 8  | 7  | 11 | 6  | 4  | 9  | 2  | 5  | 10 |
| C15341 | 11 | 6  | 9  | 1  | 2  | 7  | 8  | 5  | 3  | 4  | 10 |
| C12182 | 10 | 4  | 9  | 5  | 6  | 2  | 3  | 7  | 8  | 11 | 1  |
| C13827 | 11 | 1  | 3  | 2  | 10 | 5  | 6  | 9  | 4  | 8  | 7  |

|        |    |    |    |    |    |    |    |    |    |    |    |
|--------|----|----|----|----|----|----|----|----|----|----|----|
| C00284 | 1  | 2  | 8  | 11 | 5  | 6  | 9  | 3  | 10 | 4  | 7  |
| C10941 | 11 | 6  | 2  | 8  | 7  | 1  | 9  | 5  | 3  | 10 | 4  |
| C03840 | 11 | 8  | 5  | 2  | 1  | 6  | 4  | 10 | 3  | 7  | 9  |
| C06764 | 2  | 3  | 6  | 5  | 4  | 9  | 10 | 11 | 1  | 8  | 7  |
| C11194 | 2  | 11 | 4  | 6  | 3  | 9  | 5  | 7  | 1  | 10 | 8  |
| C14175 | 11 | 9  | 1  | 10 | 2  | 4  | 5  | 7  | 6  | 3  | 8  |
| C14421 | 11 | 4  | 8  | 2  | 1  | 10 | 5  | 3  | 6  | 9  | 7  |
| C10963 | 11 | 6  | 4  | 8  | 1  | 3  | 10 | 7  | 9  | 5  | 2  |
| C14686 | 5  | 11 | 6  | 3  | 10 | 1  | 4  | 2  | 7  | 8  | 9  |
| C12919 | 3  | 4  | 5  | 11 | 9  | 7  | 6  | 2  | 1  | 10 | 8  |
| C02502 | 8  | 2  | 11 | 10 | 9  | 6  | 4  | 1  | 5  | 7  | 3  |
| C06692 | 11 | 8  | 1  | 4  | 5  | 3  | 6  | 7  | 9  | 2  | 10 |
| C11019 | 11 | 6  | 5  | 1  | 8  | 10 | 3  | 2  | 4  | 9  | 7  |
| C02081 | 9  | 8  | 5  | 10 | 11 | 2  | 4  | 3  | 6  | 1  | 7  |
| C16434 | 5  | 6  | 2  | 1  | 8  | 10 | 4  | 9  | 11 | 3  | 7  |
| C10922 | 2  | 1  | 8  | 6  | 5  | 10 | 4  | 7  | 3  | 9  | 11 |
| C06930 | 3  | 8  | 10 | 2  | 4  | 9  | 1  | 11 | 6  | 5  | 7  |
| C08383 | 9  | 1  | 5  | 10 | 11 | 7  | 2  | 8  | 3  | 6  | 4  |
| C06916 | 3  | 11 | 8  | 5  | 9  | 1  | 6  | 2  | 10 | 7  | 4  |
| C11094 | 6  | 5  | 8  | 1  | 4  | 9  | 10 | 2  | 11 | 7  | 3  |
| C10962 | 8  | 11 | 9  | 3  | 2  | 5  | 7  | 4  | 1  | 10 | 6  |
| C05370 | 11 | 3  | 5  | 2  | 10 | 1  | 4  | 7  | 9  | 8  | 6  |
| C04684 | 11 | 2  | 5  | 7  | 10 | 4  | 9  | 8  | 3  | 6  | 1  |
| C14759 | 11 | 10 | 2  | 1  | 5  | 8  | 3  | 6  | 4  | 9  | 7  |
| C09873 | 9  | 3  | 11 | 2  | 8  | 1  | 5  | 6  | 7  | 10 | 4  |
| C11499 | 2  | 8  | 1  | 5  | 6  | 7  | 11 | 4  | 9  | 3  | 10 |
| C12104 | 11 | 8  | 1  | 9  | 6  | 3  | 2  | 5  | 7  | 10 | 4  |
| C13668 | 5  | 6  | 8  | 10 | 2  | 1  | 11 | 4  | 3  | 9  | 7  |
| C15932 | 9  | 8  | 5  | 4  | 2  | 10 | 1  | 11 | 3  | 6  | 7  |
| C02420 | 6  | 2  | 8  | 1  | 9  | 4  | 11 | 10 | 3  | 5  | 7  |
| C02084 | 1  | 2  | 5  | 8  | 6  | 11 | 10 | 4  | 9  | 7  | 3  |
| C03789 | 1  | 2  | 5  | 8  | 10 | 3  | 4  | 9  | 11 | 7  | 6  |
| C13759 | 3  | 9  | 6  | 4  | 7  | 1  | 11 | 2  | 10 | 8  | 5  |
| C11503 | 5  | 11 | 10 | 3  | 8  | 6  | 4  | 1  | 2  | 9  | 7  |
| C10024 | 3  | 5  | 2  | 8  | 7  | 1  | 11 | 9  | 6  | 4  | 10 |
| C09488 | 7  | 6  | 1  | 9  | 2  | 10 | 8  | 5  | 3  | 11 | 4  |
| C10343 | 10 | 2  | 8  | 6  | 1  | 3  | 9  | 11 | 5  | 7  | 4  |
| C12218 | 2  | 8  | 1  | 11 | 5  | 6  | 10 | 4  | 9  | 7  | 3  |
| C08556 | 10 | 5  | 7  | 11 | 4  | 9  | 3  | 6  | 2  | 8  | 1  |
| C06747 | 1  | 3  | 10 | 11 | 5  | 2  | 8  | 6  | 7  | 9  | 4  |
| C08806 | 6  | 11 | 10 | 1  | 4  | 5  | 7  | 3  | 2  | 9  | 8  |
| C15742 | 5  | 10 | 8  | 6  | 1  | 2  | 9  | 11 | 3  | 4  | 7  |
| C10920 | 11 | 1  | 4  | 3  | 9  | 5  | 10 | 6  | 8  | 2  | 7  |

|        |    |    |    |    |    |    |    |    |    |    |    |
|--------|----|----|----|----|----|----|----|----|----|----|----|
| C16014 | 11 | 8  | 2  | 5  | 3  | 1  | 4  | 9  | 10 | 7  | 6  |
| C03200 | 1  | 10 | 5  | 2  | 6  | 11 | 8  | 3  | 7  | 4  | 9  |
| C14268 | 5  | 11 | 10 | 2  | 1  | 9  | 3  | 8  | 4  | 7  | 6  |
| C10955 | 11 | 8  | 5  | 1  | 6  | 10 | 9  | 2  | 4  | 7  | 3  |
| C13821 | 3  | 11 | 8  | 10 | 5  | 7  | 9  | 2  | 6  | 1  | 4  |
| C08040 | 1  | 5  | 6  | 2  | 8  | 11 | 7  | 9  | 4  | 10 | 3  |
| C07768 | 3  | 10 | 5  | 2  | 8  | 7  | 4  | 1  | 9  | 11 | 6  |
| C10048 | 10 | 11 | 6  | 1  | 9  | 4  | 7  | 5  | 2  | 3  | 8  |
| C08862 | 3  | 6  | 2  | 4  | 10 | 7  | 11 | 8  | 1  | 5  | 9  |
| C14916 | 11 | 5  | 3  | 10 | 8  | 2  | 6  | 7  | 4  | 1  | 9  |
| C10505 | 8  | 11 | 7  | 1  | 9  | 3  | 10 | 4  | 6  | 5  | 2  |
| C13722 | 1  | 10 | 4  | 7  | 5  | 2  | 3  | 6  | 9  | 8  | 11 |
| C13014 | 1  | 11 | 9  | 10 | 5  | 2  | 6  | 7  | 3  | 8  | 4  |
| C09047 | 11 | 2  | 10 | 7  | 3  | 5  | 8  | 1  | 4  | 6  | 9  |
| C06472 | 1  | 2  | 11 | 3  | 8  | 9  | 4  | 5  | 10 | 6  | 7  |
| C13751 | 2  | 3  | 5  | 4  | 8  | 7  | 11 | 6  | 10 | 1  | 9  |
| C11765 | 6  | 10 | 11 | 8  | 7  | 1  | 5  | 9  | 2  | 3  | 4  |
| C08895 | 3  | 1  | 4  | 7  | 10 | 8  | 6  | 11 | 2  | 9  | 5  |
| C10513 | 10 | 5  | 11 | 9  | 2  | 8  | 3  | 7  | 6  | 1  | 4  |
| C10879 | 3  | 5  | 11 | 6  | 2  | 1  | 7  | 4  | 10 | 9  | 8  |
| C07606 | 10 | 11 | 8  | 5  | 9  | 2  | 4  | 6  | 3  | 1  | 7  |
| C00023 | 1  | 11 | 5  | 8  | 2  | 10 | 6  | 4  | 9  | 3  | 7  |
| C02445 | 1  | 8  | 2  | 5  | 11 | 3  | 4  | 7  | 9  | 6  | 10 |
| C00080 | 5  | 1  | 10 | 11 | 8  | 9  | 3  | 2  | 4  | 6  | 7  |
| C13697 | 10 | 1  | 2  | 5  | 11 | 4  | 9  | 3  | 8  | 6  | 7  |
| C10302 | 8  | 11 | 5  | 10 | 4  | 2  | 3  | 6  | 1  | 7  | 9  |
| C02278 | 9  | 3  | 1  | 8  | 2  | 10 | 6  | 11 | 5  | 4  | 7  |
| C10947 | 11 | 5  | 9  | 10 | 3  | 2  | 8  | 1  | 7  | 4  | 6  |
| C03961 | 5  | 2  | 6  | 8  | 4  | 1  | 11 | 10 | 3  | 9  | 7  |
| C02994 | 1  | 2  | 8  | 6  | 7  | 10 | 11 | 4  | 5  | 3  | 9  |
| C02940 | 3  | 11 | 2  | 6  | 1  | 10 | 5  | 9  | 8  | 4  | 7  |
| C03146 | 1  | 2  | 8  | 9  | 10 | 4  | 6  | 3  | 11 | 5  | 7  |
| C09603 | 3  | 1  | 8  | 9  | 4  | 11 | 7  | 5  | 2  | 10 | 6  |
| C14705 | 11 | 5  | 4  | 2  | 7  | 8  | 6  | 10 | 3  | 1  | 9  |
| C10817 | 1  | 2  | 7  | 6  | 9  | 11 | 3  | 5  | 8  | 10 | 4  |
| C10140 | 10 | 9  | 4  | 2  | 6  | 7  | 5  | 3  | 11 | 8  | 1  |
| C11012 | 3  | 10 | 7  | 11 | 9  | 4  | 1  | 5  | 2  | 8  | 6  |
| C04771 | 1  | 9  | 4  | 5  | 10 | 11 | 6  | 3  | 7  | 8  | 2  |
| C07347 | 2  | 8  | 5  | 1  | 11 | 7  | 3  | 4  | 10 | 9  | 6  |
| C14131 | 10 | 3  | 1  | 11 | 5  | 8  | 9  | 7  | 2  | 4  | 6  |
| C06546 | 5  | 10 | 11 | 7  | 9  | 6  | 2  | 3  | 8  | 4  | 1  |
| C14403 | 11 | 5  | 1  | 10 | 8  | 2  | 9  | 7  | 6  | 4  | 3  |
| C07231 | 10 | 9  | 5  | 6  | 11 | 1  | 3  | 8  | 7  | 2  | 4  |

|        |    |    |    |    |    |    |    |    |    |    |    |
|--------|----|----|----|----|----|----|----|----|----|----|----|
| C03494 | 1  | 9  | 8  | 2  | 5  | 7  | 11 | 10 | 4  | 3  | 6  |
| C11206 | 11 | 8  | 5  | 10 | 1  | 6  | 4  | 7  | 3  | 2  | 9  |
| C10999 | 11 | 8  | 5  | 1  | 4  | 3  | 9  | 2  | 7  | 10 | 6  |
| C08610 | 9  | 8  | 3  | 5  | 4  | 6  | 1  | 11 | 2  | 7  | 10 |
| C06349 | 10 | 11 | 9  | 5  | 2  | 1  | 3  | 7  | 6  | 8  | 4  |
| C14681 | 3  | 5  | 4  | 7  | 1  | 8  | 11 | 9  | 6  | 10 | 2  |
| C01892 | 2  | 8  | 5  | 10 | 11 | 9  | 1  | 6  | 7  | 3  | 4  |
| C15990 | 1  | 2  | 10 | 5  | 4  | 7  | 8  | 6  | 9  | 3  | 11 |
| C13748 | 10 | 11 | 4  | 6  | 5  | 3  | 2  | 1  | 9  | 7  | 8  |
| C08306 | 5  | 10 | 6  | 11 | 2  | 1  | 4  | 9  | 7  | 3  | 8  |
| C00225 | 2  | 8  | 11 | 6  | 5  | 1  | 10 | 9  | 3  | 4  | 7  |
| C10693 | 11 | 10 | 7  | 6  | 4  | 5  | 1  | 3  | 9  | 8  | 2  |
| C09066 | 10 | 3  | 9  | 5  | 11 | 6  | 2  | 7  | 1  | 4  | 8  |
| C10953 | 11 | 6  | 5  | 10 | 8  | 2  | 9  | 1  | 3  | 7  | 4  |
| C07488 | 10 | 5  | 8  | 2  | 9  | 3  | 4  | 1  | 6  | 11 | 7  |
| C01591 | 1  | 10 | 2  | 5  | 11 | 6  | 3  | 9  | 7  | 4  | 8  |
| C03782 | 6  | 5  | 1  | 2  | 7  | 3  | 11 | 9  | 8  | 10 | 4  |
| C03588 | 2  | 6  | 8  | 3  | 11 | 4  | 10 | 7  | 5  | 9  | 1  |
| C08265 | 2  | 8  | 3  | 5  | 9  | 4  | 6  | 11 | 10 | 1  | 7  |
| C02129 | 8  | 2  | 3  | 11 | 5  | 6  | 7  | 1  | 10 | 4  | 9  |
| C13903 | 3  | 5  | 6  | 11 | 1  | 9  | 2  | 10 | 4  | 7  | 8  |
| C01895 | 5  | 7  | 10 | 9  | 11 | 3  | 2  | 8  | 4  | 6  | 1  |
| C02868 | 8  | 2  | 11 | 9  | 10 | 6  | 7  | 1  | 5  | 3  | 4  |
| C06304 | 9  | 11 | 2  | 8  | 5  | 1  | 6  | 7  | 3  | 4  | 10 |
| C12022 | 4  | 2  | 5  | 3  | 1  | 9  | 7  | 10 | 8  | 11 | 6  |
| C05551 | 10 | 8  | 5  | 9  | 6  | 3  | 11 | 1  | 2  | 7  | 4  |
| C11174 | 1  | 2  | 4  | 10 | 7  | 6  | 5  | 8  | 9  | 11 | 3  |
| C08460 | 11 | 9  | 2  | 8  | 1  | 5  | 3  | 7  | 6  | 4  | 10 |
| C01750 | 10 | 11 | 1  | 5  | 3  | 2  | 9  | 8  | 6  | 4  | 7  |
| C14296 | 11 | 8  | 5  | 3  | 10 | 6  | 9  | 4  | 1  | 2  | 7  |
| C03466 | 9  | 5  | 8  | 10 | 7  | 11 | 4  | 2  | 3  | 1  | 6  |
| C01341 | 9  | 5  | 3  | 11 | 2  | 8  | 1  | 6  | 4  | 7  | 10 |
| C07210 | 4  | 11 | 9  | 5  | 2  | 6  | 8  | 3  | 10 | 1  | 7  |
| C10515 | 10 | 9  | 11 | 5  | 8  | 1  | 3  | 6  | 7  | 2  | 4  |
| C07865 | 10 | 4  | 5  | 9  | 8  | 1  | 7  | 2  | 3  | 11 | 6  |
| C02018 | 3  | 2  | 7  | 4  | 10 | 1  | 11 | 5  | 6  | 8  | 9  |
| C15857 | 9  | 8  | 2  | 6  | 5  | 7  | 10 | 1  | 3  | 11 | 4  |
| C11819 | 10 | 3  | 5  | 4  | 2  | 9  | 6  | 1  | 8  | 11 | 7  |
| C07412 | 11 | 9  | 4  | 6  | 5  | 2  | 8  | 3  | 1  | 10 | 7  |
| C03647 | 11 | 5  | 1  | 8  | 2  | 6  | 4  | 10 | 9  | 7  | 3  |
| C10633 | 10 | 1  | 2  | 5  | 6  | 3  | 7  | 9  | 11 | 8  | 4  |
| C11728 | 1  | 9  | 8  | 10 | 11 | 5  | 4  | 7  | 3  | 6  | 2  |
| C08352 | 1  | 2  | 5  | 10 | 3  | 6  | 8  | 9  | 4  | 11 | 7  |



|        |    |    |    |    |    |    |    |    |    |    |    |
|--------|----|----|----|----|----|----|----|----|----|----|----|
| C06348 | 10 | 11 | 9  | 5  | 8  | 2  | 3  | 4  | 6  | 1  | 7  |
| C14304 | 9  | 10 | 3  | 1  | 6  | 8  | 5  | 2  | 11 | 4  | 7  |
| C11598 | 2  | 6  | 11 | 8  | 5  | 1  | 9  | 7  | 4  | 10 | 3  |
| C16456 | 5  | 11 | 1  | 8  | 4  | 7  | 2  | 3  | 9  | 6  | 10 |
| C12811 | 3  | 11 | 7  | 2  | 9  | 5  | 4  | 1  | 6  | 8  | 10 |
| C02284 | 10 | 3  | 1  | 2  | 6  | 11 | 5  | 8  | 7  | 4  | 9  |
| C07952 | 5  | 10 | 8  | 11 | 6  | 4  | 1  | 2  | 9  | 3  | 7  |
| C04210 | 1  | 5  | 6  | 10 | 8  | 7  | 11 | 4  | 3  | 9  | 2  |
| C05374 | 1  | 2  | 7  | 10 | 4  | 5  | 3  | 8  | 6  | 11 | 9  |
| C09600 | 10 | 7  | 2  | 8  | 9  | 6  | 3  | 4  | 5  | 11 | 1  |
| C15377 | 3  | 5  | 7  | 8  | 11 | 4  | 10 | 1  | 9  | 2  | 6  |
| C02006 | 9  | 2  | 7  | 10 | 1  | 3  | 5  | 4  | 8  | 6  | 11 |
| C14337 | 11 | 10 | 9  | 6  | 2  | 5  | 1  | 4  | 3  | 8  | 7  |
| C01475 | 5  | 6  | 2  | 8  | 10 | 1  | 11 | 4  | 7  | 9  | 3  |
| C13129 | 10 | 11 | 1  | 7  | 8  | 9  | 2  | 6  | 5  | 3  | 4  |
| C10695 | 8  | 2  | 5  | 9  | 10 | 11 | 3  | 1  | 6  | 4  | 7  |
| C07928 | 11 | 5  | 6  | 8  | 2  | 3  | 4  | 7  | 10 | 9  | 1  |
| C11762 | 1  | 10 | 4  | 5  | 7  | 6  | 2  | 8  | 3  | 11 | 9  |
| C14816 | 2  | 10 | 5  | 9  | 4  | 7  | 3  | 8  | 6  | 11 | 1  |
| C10270 | 3  | 4  | 7  | 2  | 9  | 8  | 11 | 10 | 1  | 5  | 6  |
| C14308 | 9  | 8  | 3  | 1  | 11 | 2  | 4  | 7  | 6  | 10 | 5  |
| C01968 | 1  | 9  | 7  | 10 | 4  | 3  | 2  | 6  | 5  | 11 | 8  |
| C02272 | 11 | 5  | 2  | 8  | 1  | 7  | 3  | 4  | 6  | 9  | 10 |
| C13762 | 10 | 3  | 2  | 5  | 8  | 1  | 6  | 11 | 9  | 4  | 7  |
| C09032 | 10 | 5  | 3  | 9  | 1  | 2  | 4  | 11 | 7  | 6  | 8  |
| C08391 | 5  | 2  | 6  | 8  | 7  | 9  | 4  | 3  | 10 | 1  | 11 |
| C07767 | 4  | 1  | 11 | 5  | 2  | 8  | 3  | 6  | 7  | 10 | 9  |
| C14547 | 3  | 11 | 7  | 9  | 4  | 8  | 6  | 5  | 1  | 10 | 2  |
| C02628 | 10 | 6  | 4  | 9  | 1  | 8  | 3  | 5  | 2  | 7  | 11 |
| C07267 | 10 | 3  | 5  | 1  | 6  | 8  | 2  | 11 | 4  | 9  | 7  |
| C03827 | 8  | 2  | 9  | 5  | 1  | 11 | 6  | 10 | 3  | 7  | 4  |
| C06946 | 5  | 10 | 11 | 3  | 9  | 1  | 8  | 2  | 4  | 6  | 7  |
| C14525 | 11 | 9  | 7  | 10 | 5  | 3  | 4  | 6  | 8  | 2  | 1  |
| C06733 | 8  | 2  | 11 | 4  | 3  | 5  | 10 | 6  | 9  | 1  | 7  |
| C06809 | 1  | 5  | 6  | 11 | 8  | 2  | 10 | 9  | 4  | 3  | 7  |
| C14225 | 11 | 3  | 5  | 8  | 9  | 2  | 4  | 7  | 1  | 6  | 10 |
| C08010 | 11 | 10 | 5  | 4  | 7  | 3  | 1  | 8  | 6  | 2  | 9  |
| C14396 | 11 | 9  | 1  | 5  | 10 | 7  | 8  | 3  | 2  | 6  | 4  |
| C11111 | 3  | 9  | 6  | 8  | 4  | 2  | 11 | 1  | 7  | 10 | 5  |
| C03293 | 10 | 2  | 5  | 11 | 9  | 4  | 1  | 6  | 7  | 3  | 8  |
| C08841 | 10 | 1  | 4  | 9  | 5  | 3  | 11 | 7  | 2  | 8  | 6  |
| C07949 | 5  | 11 | 10 | 1  | 8  | 9  | 7  | 2  | 3  | 4  | 6  |
| C02712 | 5  | 1  | 8  | 2  | 10 | 6  | 4  | 11 | 9  | 7  | 3  |

|        |    |    |    |    |    |    |    |    |    |    |    |
|--------|----|----|----|----|----|----|----|----|----|----|----|
| C09277 | 10 | 9  | 7  | 5  | 1  | 3  | 6  | 2  | 4  | 8  | 11 |
| C06906 | 5  | 10 | 8  | 11 | 6  | 4  | 1  | 2  | 9  | 7  | 3  |
| C12201 | 10 | 9  | 7  | 1  | 11 | 3  | 5  | 8  | 4  | 6  | 2  |
| C10921 | 11 | 1  | 8  | 2  | 6  | 3  | 10 | 9  | 7  | 5  | 4  |
| C07555 | 11 | 8  | 2  | 1  | 6  | 3  | 5  | 9  | 4  | 10 | 7  |
| C09159 | 9  | 3  | 2  | 10 | 8  | 11 | 5  | 6  | 1  | 7  | 4  |
| C01518 | 1  | 10 | 2  | 9  | 7  | 8  | 6  | 11 | 3  | 5  | 4  |
| C09077 | 10 | 11 | 9  | 6  | 4  | 2  | 8  | 1  | 3  | 7  | 5  |
| C01319 | 1  | 2  | 5  | 9  | 8  | 6  | 11 | 10 | 4  | 3  | 7  |
| C11142 | 2  | 8  | 5  | 6  | 11 | 10 | 3  | 4  | 9  | 7  | 1  |
| C04378 | 10 | 8  | 11 | 3  | 1  | 5  | 2  | 9  | 6  | 4  | 7  |
| C06358 | 9  | 5  | 10 | 11 | 8  | 1  | 6  | 3  | 2  | 4  | 7  |
| C08183 | 3  | 11 | 8  | 2  | 1  | 9  | 5  | 4  | 10 | 7  | 6  |
| C01007 | 8  | 2  | 6  | 10 | 11 | 1  | 5  | 7  | 4  | 3  | 9  |
| C02549 | 2  | 8  | 10 | 1  | 6  | 4  | 3  | 5  | 7  | 9  | 11 |
| C06857 | 5  | 10 | 11 | 1  | 8  | 2  | 6  | 4  | 7  | 3  | 9  |
| C02223 | 5  | 2  | 11 | 1  | 9  | 10 | 6  | 8  | 4  | 3  | 7  |
| C02747 | 2  | 8  | 6  | 7  | 10 | 3  | 1  | 11 | 4  | 9  | 5  |
| C09017 | 9  | 11 | 10 | 6  | 4  | 5  | 1  | 3  | 2  | 8  | 7  |
| C09801 | 11 | 10 | 9  | 5  | 1  | 8  | 4  | 7  | 3  | 6  | 2  |
| C01819 | 5  | 10 | 8  | 11 | 6  | 2  | 9  | 1  | 7  | 3  | 4  |
| C15531 | 5  | 10 | 9  | 7  | 3  | 8  | 11 | 6  | 1  | 2  | 4  |
| C15569 | 8  | 2  | 9  | 6  | 5  | 10 | 7  | 3  | 1  | 11 | 4  |
| C08039 | 11 | 5  | 1  | 4  | 9  | 6  | 8  | 3  | 2  | 10 | 7  |
| C11734 | 5  | 11 | 10 | 8  | 3  | 6  | 7  | 2  | 9  | 1  | 4  |
| C08110 | 10 | 9  | 6  | 4  | 2  | 11 | 7  | 3  | 1  | 8  | 5  |
| C11766 | 10 | 11 | 1  | 5  | 2  | 8  | 3  | 4  | 6  | 7  | 9  |
| C10815 | 5  | 6  | 8  | 2  | 1  | 4  | 11 | 7  | 3  | 9  | 10 |
| C03374 | 1  | 9  | 8  | 3  | 4  | 5  | 11 | 7  | 10 | 6  | 2  |
| C08353 | 1  | 2  | 8  | 5  | 4  | 6  | 11 | 10 | 9  | 7  | 3  |
| C14279 | 1  | 11 | 5  | 2  | 3  | 8  | 9  | 10 | 6  | 4  | 7  |
| C08688 | 10 | 9  | 11 | 2  | 5  | 7  | 4  | 1  | 3  | 6  | 8  |
| C16260 | 3  | 1  | 2  | 5  | 4  | 6  | 11 | 9  | 7  | 8  | 10 |
| C11847 | 5  | 10 | 1  | 9  | 6  | 11 | 3  | 4  | 8  | 7  | 2  |
| C06870 | 5  | 10 | 6  | 4  | 2  | 8  | 1  | 3  | 7  | 9  | 11 |
| C11773 | 5  | 10 | 1  | 6  | 8  | 7  | 4  | 3  | 11 | 2  | 9  |
| C12159 | 9  | 5  | 8  | 2  | 11 | 6  | 3  | 10 | 7  | 4  | 1  |
| C08104 | 10 | 9  | 11 | 5  | 6  | 3  | 1  | 7  | 2  | 8  | 4  |
| C02366 | 6  | 2  | 5  | 8  | 10 | 1  | 11 | 9  | 7  | 3  | 4  |
| C05601 | 5  | 8  | 1  | 2  | 9  | 11 | 6  | 4  | 3  | 7  | 10 |
| C10083 | 10 | 3  | 4  | 7  | 6  | 11 | 2  | 8  | 1  | 5  | 9  |
| C03104 | 4  | 2  | 1  | 7  | 5  | 6  | 11 | 3  | 9  | 10 | 8  |
| C07256 | 5  | 11 | 10 | 8  | 2  | 9  | 1  | 6  | 3  | 7  | 4  |

|        |    |    |    |    |    |    |    |    |    |    |    |
|--------|----|----|----|----|----|----|----|----|----|----|----|
| C07575 | 5  | 10 | 1  | 6  | 8  | 2  | 3  | 11 | 9  | 7  | 4  |
| C15997 | 4  | 11 | 10 | 8  | 6  | 2  | 5  | 9  | 3  | 7  | 1  |
| C10366 | 10 | 9  | 11 | 5  | 6  | 4  | 8  | 3  | 1  | 7  | 2  |
| C03654 | 1  | 2  | 9  | 3  | 4  | 10 | 8  | 5  | 6  | 7  | 11 |
| C09593 | 10 | 11 | 8  | 1  | 5  | 2  | 9  | 3  | 7  | 6  | 4  |
| C06948 | 5  | 11 | 10 | 1  | 8  | 3  | 6  | 2  | 9  | 7  | 4  |
| C07327 | 1  | 8  | 11 | 2  | 3  | 6  | 10 | 5  | 9  | 4  | 7  |
| C01541 | 10 | 11 | 8  | 5  | 1  | 3  | 9  | 2  | 6  | 7  | 4  |
| C08153 | 3  | 9  | 11 | 1  | 8  | 10 | 2  | 5  | 4  | 6  | 7  |
| C00478 | 1  | 10 | 11 | 6  | 7  | 4  | 9  | 3  | 2  | 8  | 5  |
| C06418 | 5  | 6  | 2  | 1  | 8  | 10 | 4  | 9  | 11 | 3  | 7  |
| C10696 | 10 | 1  | 4  | 2  | 5  | 11 | 9  | 8  | 6  | 7  | 3  |
| C11251 | 3  | 9  | 11 | 5  | 8  | 10 | 6  | 2  | 1  | 7  | 4  |
| C14584 | 9  | 5  | 11 | 1  | 6  | 7  | 3  | 2  | 8  | 10 | 4  |
| C08270 | 5  | 6  | 2  | 8  | 4  | 1  | 10 | 11 | 7  | 9  | 3  |
| C06438 | 3  | 5  | 8  | 11 | 7  | 6  | 10 | 9  | 4  | 1  | 2  |
| C13677 | 2  | 11 | 3  | 7  | 4  | 6  | 1  | 5  | 9  | 10 | 8  |
| C02785 | 8  | 2  | 11 | 7  | 5  | 4  | 3  | 9  | 6  | 10 | 1  |
| C14650 | 3  | 9  | 1  | 4  | 8  | 10 | 11 | 7  | 6  | 5  | 2  |
| C11611 | 1  | 10 | 11 | 5  | 6  | 7  | 4  | 9  | 3  | 8  | 2  |
| C16435 | 5  | 6  | 1  | 2  | 8  | 10 | 4  | 9  | 11 | 3  | 7  |
| C02577 | 10 | 11 | 5  | 3  | 8  | 2  | 4  | 1  | 9  | 6  | 7  |
| C14492 | 6  | 2  | 4  | 3  | 8  | 5  | 11 | 10 | 7  | 9  | 1  |
| C07360 | 10 | 5  | 2  | 8  | 6  | 4  | 9  | 1  | 3  | 11 | 7  |
| C12043 | 5  | 8  | 10 | 9  | 11 | 3  | 2  | 1  | 6  | 4  | 7  |
| C10893 | 10 | 11 | 1  | 5  | 3  | 6  | 4  | 2  | 8  | 9  | 7  |
| C13728 | 5  | 10 | 6  | 1  | 2  | 8  | 4  | 11 | 3  | 7  | 9  |
| C09655 | 10 | 3  | 9  | 5  | 1  | 11 | 8  | 4  | 7  | 6  | 2  |
| C09631 | 9  | 11 | 3  | 10 | 5  | 8  | 7  | 2  | 6  | 1  | 4  |
| C08935 | 1  | 11 | 10 | 4  | 9  | 7  | 2  | 8  | 3  | 5  | 6  |
| C02843 | 1  | 5  | 2  | 3  | 11 | 8  | 9  | 6  | 4  | 10 | 7  |
| C15501 | 1  | 5  | 2  | 11 | 8  | 6  | 4  | 7  | 9  | 3  | 10 |
| C05649 | 8  | 2  | 5  | 11 | 6  | 9  | 10 | 1  | 7  | 4  | 3  |
| C12590 | 11 | 1  | 4  | 7  | 9  | 6  | 10 | 3  | 8  | 2  | 5  |
| C00200 | 1  | 2  | 8  | 11 | 5  | 6  | 10 | 3  | 4  | 9  | 7  |
| C08230 | 8  | 5  | 2  | 1  | 6  | 11 | 10 | 4  | 9  | 3  | 7  |
| C02132 | 11 | 5  | 1  | 2  | 9  | 6  | 8  | 3  | 7  | 4  | 10 |
| C14478 | 3  | 1  | 5  | 2  | 4  | 11 | 8  | 9  | 7  | 6  | 10 |
| C13914 | 3  | 1  | 2  | 9  | 4  | 5  | 8  | 11 | 7  | 6  | 10 |
| C09102 | 10 | 1  | 8  | 7  | 3  | 9  | 11 | 4  | 5  | 2  | 6  |
| C06485 | 1  | 2  | 8  | 6  | 10 | 9  | 4  | 3  | 11 | 5  | 7  |
| C07367 | 11 | 9  | 6  | 10 | 2  | 5  | 4  | 7  | 8  | 3  | 1  |
| C03766 | 6  | 2  | 1  | 8  | 10 | 5  | 11 | 9  | 3  | 4  | 7  |

|        |    |    |    |    |    |    |    |    |    |    |    |
|--------|----|----|----|----|----|----|----|----|----|----|----|
| C13967 | 10 | 1  | 9  | 5  | 6  | 2  | 8  | 11 | 4  | 3  | 7  |
| C13733 | 5  | 2  | 4  | 6  | 8  | 1  | 3  | 10 | 11 | 9  | 7  |
| C13993 | 10 | 9  | 11 | 4  | 5  | 6  | 8  | 1  | 3  | 2  | 7  |
| C11659 | 10 | 9  | 6  | 5  | 3  | 8  | 1  | 11 | 2  | 7  | 4  |
| C11119 | 2  | 5  | 6  | 10 | 1  | 8  | 3  | 4  | 7  | 11 | 9  |
| C09095 | 5  | 3  | 6  | 7  | 2  | 10 | 11 | 8  | 1  | 9  | 4  |
| C02864 | 5  | 10 | 9  | 6  | 8  | 4  | 7  | 3  | 11 | 1  | 2  |
| C09680 | 9  | 8  | 2  | 11 | 5  | 3  | 10 | 7  | 1  | 4  | 6  |
| C02796 | 2  | 6  | 8  | 5  | 10 | 7  | 4  | 11 | 3  | 1  | 9  |
| C00902 | 5  | 6  | 10 | 8  | 1  | 2  | 11 | 9  | 4  | 3  | 7  |
| C09287 | 10 | 9  | 3  | 11 | 1  | 6  | 4  | 5  | 8  | 7  | 2  |
| C15771 | 5  | 1  | 2  | 6  | 11 | 8  | 10 | 4  | 9  | 7  | 3  |
| C08032 | 9  | 10 | 6  | 11 | 7  | 8  | 4  | 1  | 3  | 2  | 5  |
| C12755 | 10 | 5  | 9  | 2  | 6  | 7  | 3  | 1  | 8  | 11 | 4  |
| C03443 | 5  | 2  | 6  | 11 | 1  | 4  | 10 | 9  | 8  | 3  | 7  |
| C11020 | 11 | 2  | 8  | 10 | 6  | 1  | 5  | 3  | 4  | 9  | 7  |
| C13670 | 11 | 6  | 10 | 8  | 5  | 1  | 2  | 4  | 3  | 9  | 7  |
| C11322 | 3  | 1  | 11 | 2  | 5  | 10 | 9  | 7  | 6  | 8  | 4  |
| C08405 | 10 | 6  | 3  | 1  | 7  | 8  | 5  | 11 | 2  | 4  | 9  |
| C07040 | 10 | 5  | 11 | 3  | 1  | 6  | 2  | 4  | 8  | 9  | 7  |
| C03710 | 2  | 5  | 6  | 8  | 4  | 11 | 3  | 1  | 10 | 7  | 9  |
| C13756 | 10 | 9  | 5  | 11 | 4  | 3  | 6  | 2  | 7  | 8  | 1  |
| C07010 | 5  | 10 | 11 | 3  | 4  | 7  | 6  | 1  | 2  | 8  | 9  |
| C01771 | 1  | 11 | 5  | 3  | 2  | 8  | 6  | 9  | 4  | 10 | 7  |
| C03804 | 2  | 7  | 8  | 9  | 6  | 1  | 4  | 3  | 10 | 11 | 5  |
| C08127 | 3  | 2  | 7  | 9  | 8  | 6  | 11 | 10 | 5  | 1  | 4  |
| C07128 | 10 | 11 | 5  | 2  | 1  | 4  | 6  | 8  | 3  | 7  | 9  |
| C07604 | 10 | 9  | 4  | 7  | 11 | 3  | 2  | 6  | 8  | 1  | 5  |
| C12174 | 10 | 7  | 2  | 1  | 9  | 8  | 3  | 4  | 11 | 6  | 5  |
| C04359 | 1  | 7  | 4  | 3  | 2  | 5  | 11 | 6  | 9  | 8  | 10 |
| C12178 | 5  | 10 | 7  | 1  | 11 | 2  | 8  | 3  | 9  | 4  | 6  |
| C13857 | 3  | 1  | 8  | 11 | 2  | 5  | 10 | 6  | 4  | 9  | 7  |
| C04576 | 1  | 10 | 2  | 8  | 11 | 5  | 6  | 4  | 7  | 3  | 9  |
| C09588 | 10 | 11 | 4  | 2  | 8  | 3  | 6  | 5  | 7  | 9  | 1  |
| C10757 | 9  | 8  | 10 | 7  | 6  | 5  | 11 | 3  | 1  | 4  | 2  |
| C04776 | 5  | 2  | 3  | 6  | 8  | 1  | 4  | 9  | 11 | 10 | 7  |
| C15634 | 8  | 11 | 5  | 3  | 6  | 4  | 9  | 10 | 1  | 2  | 7  |
| C09267 | 9  | 10 | 5  | 1  | 11 | 2  | 8  | 6  | 7  | 4  | 3  |
| C00580 | 2  | 5  | 8  | 11 | 1  | 6  | 9  | 3  | 4  | 10 | 7  |
| C10203 | 10 | 2  | 4  | 6  | 1  | 3  | 5  | 8  | 7  | 11 | 9  |
| C07617 | 3  | 10 | 5  | 11 | 9  | 8  | 6  | 2  | 1  | 7  | 4  |
| C06528 | 6  | 2  | 10 | 5  | 8  | 9  | 4  | 11 | 7  | 1  | 3  |
| C14426 | 11 | 9  | 10 | 2  | 1  | 3  | 6  | 7  | 8  | 4  | 5  |

|        |    |    |    |    |    |    |    |    |    |    |    |
|--------|----|----|----|----|----|----|----|----|----|----|----|
| C09274 | 10 | 5  | 1  | 6  | 3  | 7  | 9  | 11 | 2  | 4  | 8  |
| C10540 | 10 | 2  | 5  | 6  | 9  | 8  | 4  | 1  | 7  | 3  | 11 |
| C03661 | 1  | 10 | 8  | 11 | 6  | 9  | 2  | 3  | 4  | 7  | 5  |
| C11280 | 10 | 9  | 3  | 8  | 5  | 1  | 11 | 6  | 4  | 2  | 7  |
| C08783 | 9  | 10 | 6  | 5  | 11 | 3  | 4  | 7  | 2  | 8  | 1  |
| C13646 | 10 | 5  | 11 | 8  | 7  | 3  | 9  | 1  | 4  | 2  | 6  |
| C15713 | 11 | 2  | 10 | 5  | 4  | 6  | 7  | 1  | 3  | 9  | 8  |
| C13058 | 5  | 1  | 2  | 6  | 8  | 4  | 10 | 11 | 3  | 9  | 7  |
| C07379 | 10 | 8  | 11 | 5  | 2  | 4  | 3  | 1  | 7  | 9  | 6  |
| C00883 | 1  | 10 | 7  | 3  | 4  | 9  | 8  | 11 | 2  | 6  | 5  |
| C09981 | 10 | 3  | 9  | 11 | 2  | 1  | 5  | 8  | 6  | 4  | 7  |
| C10765 | 10 | 5  | 11 | 8  | 9  | 1  | 2  | 7  | 4  | 3  | 6  |
| C04856 | 2  | 4  | 9  | 10 | 7  | 1  | 8  | 3  | 5  | 11 | 6  |
| C02812 | 1  | 6  | 4  | 2  | 5  | 7  | 9  | 11 | 3  | 10 | 8  |
| C13817 | 10 | 4  | 2  | 5  | 6  | 1  | 3  | 8  | 9  | 11 | 7  |
| C10498 | 10 | 2  | 9  | 1  | 11 | 4  | 5  | 6  | 8  | 3  | 7  |
| C07228 | 3  | 2  | 5  | 11 | 9  | 10 | 6  | 4  | 8  | 1  | 7  |
| C14689 | 1  | 2  | 8  | 5  | 6  | 4  | 9  | 3  | 11 | 10 | 7  |
| C09243 | 5  | 10 | 9  | 6  | 7  | 1  | 11 | 4  | 3  | 8  | 2  |
| C13280 | 8  | 10 | 5  | 3  | 2  | 1  | 4  | 11 | 9  | 6  | 7  |
| C11261 | 6  | 5  | 8  | 1  | 11 | 2  | 3  | 10 | 4  | 9  | 7  |
| C10106 | 10 | 5  | 8  | 6  | 9  | 7  | 4  | 2  | 3  | 11 | 1  |
| C14216 | 11 | 5  | 8  | 9  | 3  | 10 | 4  | 7  | 2  | 6  | 1  |
| C00466 | 1  | 2  | 5  | 8  | 9  | 6  | 11 | 3  | 4  | 7  | 10 |
| C03901 | 5  | 10 | 2  | 8  | 1  | 7  | 11 | 3  | 6  | 4  | 9  |
| C10219 | 10 | 11 | 5  | 2  | 7  | 8  | 6  | 3  | 9  | 4  | 1  |
| C06800 | 11 | 8  | 2  | 6  | 10 | 9  | 1  | 4  | 5  | 3  | 7  |
| C08936 | 10 | 8  | 6  | 9  | 11 | 3  | 7  | 5  | 2  | 1  | 4  |
| C15602 | 11 | 8  | 2  | 5  | 6  | 10 | 1  | 9  | 4  | 7  | 3  |
| C10501 | 10 | 1  | 9  | 5  | 11 | 8  | 6  | 4  | 3  | 2  | 7  |
| C02571 | 5  | 1  | 3  | 6  | 11 | 8  | 9  | 2  | 10 | 7  | 4  |
| C08497 | 9  | 3  | 11 | 1  | 5  | 10 | 6  | 2  | 4  | 7  | 8  |
| C00943 | 4  | 10 | 2  | 7  | 9  | 8  | 5  | 1  | 3  | 6  | 11 |
| C06818 | 5  | 10 | 6  | 2  | 11 | 8  | 4  | 1  | 9  | 3  | 7  |
| C11584 | 1  | 4  | 3  | 5  | 8  | 9  | 10 | 2  | 11 | 7  | 6  |
| C08122 | 9  | 10 | 8  | 5  | 11 | 1  | 4  | 6  | 3  | 7  | 2  |
| C10820 | 9  | 4  | 10 | 2  | 6  | 3  | 1  | 7  | 8  | 5  | 11 |
| C06381 | 2  | 6  | 4  | 5  | 11 | 1  | 8  | 10 | 7  | 3  | 9  |
| C14303 | 3  | 4  | 11 | 10 | 5  | 2  | 1  | 8  | 9  | 7  | 6  |
| C13511 | 8  | 11 | 10 | 1  | 2  | 5  | 4  | 3  | 9  | 7  | 6  |
| C15996 | 2  | 6  | 3  | 1  | 8  | 4  | 11 | 7  | 5  | 9  | 10 |
| C11708 | 10 | 5  | 11 | 4  | 8  | 6  | 3  | 7  | 1  | 2  | 9  |
| C13729 | 10 | 4  | 3  | 2  | 5  | 6  | 9  | 1  | 11 | 8  | 7  |

|        |    |    |    |    |    |    |    |    |    |    |    |
|--------|----|----|----|----|----|----|----|----|----|----|----|
| C10084 | 10 | 5  | 1  | 11 | 9  | 8  | 2  | 6  | 3  | 4  | 7  |
| C00698 | 1  | 11 | 5  | 2  | 8  | 6  | 3  | 4  | 10 | 9  | 7  |
| C03427 | 9  | 3  | 8  | 2  | 6  | 7  | 5  | 11 | 4  | 1  | 10 |
| C08367 | 3  | 1  | 6  | 10 | 9  | 8  | 5  | 7  | 11 | 4  | 2  |
| C11210 | 5  | 1  | 6  | 2  | 4  | 10 | 3  | 7  | 11 | 9  | 8  |
| C09623 | 10 | 3  | 1  | 7  | 9  | 11 | 6  | 4  | 8  | 2  | 5  |
| C10337 | 11 | 7  | 1  | 8  | 2  | 5  | 3  | 4  | 10 | 9  | 6  |
| C11216 | 2  | 3  | 11 | 9  | 8  | 10 | 1  | 7  | 5  | 6  | 4  |
| C08503 | 1  | 11 | 6  | 5  | 9  | 3  | 8  | 2  | 4  | 7  | 10 |
| C10734 | 3  | 5  | 6  | 1  | 8  | 7  | 9  | 11 | 2  | 4  | 10 |
| C09217 | 10 | 9  | 5  | 1  | 8  | 4  | 2  | 11 | 3  | 6  | 7  |
| C05918 | 8  | 11 | 5  | 9  | 2  | 10 | 7  | 3  | 6  | 4  | 1  |
| C11507 | 11 | 2  | 8  | 1  | 3  | 5  | 4  | 6  | 10 | 9  | 7  |
| C12954 | 4  | 10 | 3  | 9  | 2  | 8  | 5  | 6  | 11 | 1  | 7  |
| C12842 | 3  | 10 | 8  | 5  | 9  | 6  | 7  | 4  | 2  | 11 | 1  |
| C09922 | 10 | 11 | 2  | 1  | 5  | 8  | 3  | 4  | 9  | 6  | 7  |
| C07542 | 5  | 10 | 11 | 3  | 6  | 1  | 7  | 4  | 8  | 2  | 9  |
| C09268 | 10 | 11 | 5  | 1  | 8  | 9  | 6  | 3  | 4  | 7  | 2  |
| C08112 | 10 | 9  | 6  | 5  | 11 | 3  | 1  | 2  | 4  | 8  | 7  |
| C01352 | 3  | 5  | 9  | 2  | 8  | 4  | 1  | 11 | 6  | 10 | 7  |
| C13167 | 10 | 5  | 3  | 4  | 8  | 6  | 2  | 9  | 11 | 7  | 1  |
| C14415 | 11 | 2  | 5  | 1  | 6  | 10 | 8  | 4  | 7  | 9  | 3  |
| C12677 | 3  | 11 | 5  | 1  | 10 | 7  | 8  | 2  | 9  | 6  | 4  |
| C07434 | 11 | 5  | 10 | 8  | 6  | 1  | 4  | 3  | 9  | 2  | 7  |
| C07045 | 10 | 5  | 9  | 11 | 2  | 7  | 1  | 8  | 3  | 4  | 6  |
| C09210 | 10 | 3  | 7  | 2  | 11 | 8  | 6  | 5  | 4  | 9  | 1  |
| C08535 | 11 | 9  | 10 | 5  | 4  | 2  | 7  | 6  | 3  | 8  | 1  |
| C04103 | 4  | 9  | 1  | 3  | 7  | 6  | 2  | 10 | 11 | 8  | 5  |
| C09264 | 1  | 10 | 5  | 2  | 6  | 9  | 8  | 3  | 11 | 7  | 4  |
| C13687 | 11 | 1  | 6  | 2  | 9  | 7  | 10 | 8  | 5  | 3  | 4  |
| C11029 | 11 | 6  | 5  | 1  | 3  | 2  | 8  | 9  | 4  | 7  | 10 |
| C01871 | 2  | 5  | 9  | 8  | 3  | 10 | 7  | 1  | 6  | 4  | 11 |
| C07635 | 3  | 2  | 1  | 8  | 11 | 4  | 5  | 9  | 6  | 7  | 10 |
| C14249 | 3  | 9  | 8  | 6  | 2  | 7  | 1  | 5  | 11 | 10 | 4  |
| C08486 | 2  | 10 | 8  | 5  | 11 | 3  | 6  | 4  | 9  | 1  | 7  |
| C06925 | 3  | 8  | 10 | 5  | 9  | 1  | 7  | 11 | 4  | 6  | 2  |
| C16241 | 8  | 5  | 2  | 1  | 6  | 11 | 10 | 9  | 3  | 4  | 7  |
| C07140 | 3  | 10 | 9  | 4  | 5  | 2  | 11 | 8  | 1  | 6  | 7  |
| C06854 | 8  | 9  | 10 | 1  | 2  | 11 | 5  | 7  | 3  | 6  | 4  |
| C10356 | 10 | 6  | 1  | 2  | 9  | 7  | 11 | 3  | 8  | 5  | 4  |
| C08616 | 3  | 2  | 10 | 8  | 6  | 9  | 11 | 1  | 7  | 5  | 4  |
| C07600 | 10 | 5  | 8  | 9  | 11 | 2  | 3  | 6  | 4  | 1  | 7  |
| C09018 | 11 | 9  | 10 | 1  | 5  | 6  | 2  | 3  | 8  | 7  | 4  |

|        |    |    |    |    |    |    |    |    |    |    |    |
|--------|----|----|----|----|----|----|----|----|----|----|----|
| C13910 | 3  | 11 | 1  | 6  | 5  | 9  | 8  | 7  | 10 | 2  | 4  |
| C07433 | 5  | 10 | 1  | 7  | 4  | 9  | 11 | 3  | 8  | 6  | 2  |
| C14524 | 6  | 2  | 7  | 4  | 9  | 5  | 1  | 8  | 3  | 11 | 10 |
| C10136 | 1  | 5  | 8  | 3  | 11 | 6  | 9  | 2  | 10 | 4  | 7  |
| C10760 | 10 | 9  | 5  | 8  | 2  | 4  | 3  | 11 | 7  | 1  | 6  |
| C14532 | 11 | 10 | 2  | 3  | 5  | 1  | 8  | 7  | 9  | 4  | 6  |
| C01839 | 2  | 11 | 5  | 8  | 1  | 4  | 6  | 9  | 10 | 3  | 7  |
| C06880 | 10 | 9  | 6  | 5  | 11 | 2  | 1  | 4  | 8  | 3  | 7  |
| C14384 | 11 | 7  | 9  | 4  | 6  | 10 | 3  | 2  | 1  | 5  | 8  |
| C14458 | 10 | 11 | 3  | 7  | 9  | 8  | 6  | 1  | 5  | 2  | 4  |
| C08145 | 11 | 3  | 10 | 2  | 4  | 6  | 9  | 1  | 5  | 8  | 7  |
| C02595 | 5  | 10 | 11 | 8  | 9  | 2  | 3  | 1  | 7  | 4  | 6  |
| C04639 | 4  | 2  | 5  | 8  | 1  | 6  | 9  | 3  | 10 | 7  | 11 |
| C14259 | 3  | 11 | 5  | 1  | 8  | 2  | 10 | 9  | 4  | 7  | 6  |
| C11081 | 11 | 2  | 1  | 6  | 3  | 5  | 7  | 10 | 8  | 9  | 4  |
| C14490 | 1  | 8  | 7  | 2  | 5  | 3  | 6  | 11 | 9  | 10 | 4  |
| C08054 | 9  | 10 | 11 | 5  | 8  | 4  | 1  | 3  | 7  | 6  | 2  |
| C11438 | 9  | 6  | 8  | 10 | 5  | 4  | 11 | 2  | 3  | 7  | 1  |
| C07245 | 5  | 10 | 8  | 1  | 6  | 11 | 2  | 9  | 3  | 7  | 4  |
| C09778 | 10 | 9  | 4  | 11 | 5  | 6  | 2  | 7  | 8  | 3  | 1  |
| C07827 | 10 | 5  | 11 | 4  | 3  | 6  | 1  | 8  | 7  | 2  | 9  |
| C11059 | 11 | 1  | 4  | 10 | 2  | 8  | 3  | 9  | 7  | 6  | 5  |
| C08441 | 4  | 9  | 8  | 2  | 10 | 1  | 3  | 5  | 6  | 11 | 7  |
| C04075 | 2  | 5  | 6  | 8  | 11 | 4  | 10 | 9  | 1  | 3  | 7  |
| C09131 | 10 | 5  | 8  | 3  | 6  | 9  | 11 | 4  | 2  | 1  | 7  |
| C04695 | 1  | 4  | 9  | 10 | 8  | 3  | 2  | 6  | 7  | 11 | 5  |
| C14685 | 11 | 10 | 5  | 1  | 8  | 6  | 2  | 9  | 3  | 7  | 4  |
| C10591 | 2  | 5  | 4  | 6  | 10 | 11 | 8  | 7  | 1  | 3  | 9  |
| C07588 | 11 | 5  | 8  | 3  | 2  | 1  | 9  | 6  | 4  | 10 | 7  |
| C01183 | 2  | 8  | 6  | 11 | 1  | 5  | 10 | 9  | 3  | 4  | 7  |
| C02655 | 1  | 2  | 10 | 7  | 8  | 6  | 9  | 5  | 4  | 11 | 3  |
| C12250 | 11 | 4  | 8  | 6  | 7  | 3  | 10 | 1  | 5  | 9  | 2  |
| C10549 | 9  | 3  | 7  | 10 | 6  | 5  | 11 | 4  | 8  | 1  | 2  |
| C15572 | 11 | 5  | 10 | 9  | 8  | 1  | 6  | 3  | 2  | 4  | 7  |
| C09178 | 11 | 8  | 5  | 6  | 1  | 2  | 7  | 9  | 3  | 4  | 10 |
| C11476 | 1  | 4  | 2  | 8  | 5  | 9  | 10 | 6  | 7  | 11 | 3  |
| C08968 | 3  | 7  | 2  | 10 | 6  | 11 | 1  | 9  | 8  | 5  | 4  |
| C07815 | 5  | 10 | 3  | 8  | 4  | 11 | 2  | 1  | 9  | 6  | 7  |
| C01785 | 11 | 10 | 5  | 1  | 8  | 2  | 3  | 6  | 9  | 4  | 7  |
| C01066 | 11 | 8  | 1  | 2  | 3  | 5  | 6  | 10 | 7  | 9  | 4  |
| C10996 | 9  | 11 | 3  | 5  | 6  | 1  | 7  | 4  | 2  | 10 | 8  |
| C10645 | 11 | 1  | 3  | 6  | 5  | 7  | 8  | 4  | 9  | 2  | 10 |
| C07120 | 3  | 11 | 9  | 6  | 2  | 5  | 1  | 8  | 4  | 7  | 10 |

|        |    |    |    |    |    |    |    |    |    |    |    |
|--------|----|----|----|----|----|----|----|----|----|----|----|
| C11035 | 8  | 5  | 3  | 2  | 6  | 4  | 11 | 9  | 7  | 10 | 1  |
| C13665 | 5  | 10 | 11 | 1  | 8  | 2  | 3  | 6  | 7  | 9  | 4  |
| C10316 | 11 | 10 | 9  | 3  | 5  | 7  | 1  | 6  | 8  | 4  | 2  |
| C08597 | 8  | 9  | 1  | 4  | 3  | 7  | 5  | 11 | 10 | 2  | 6  |
| C01783 | 11 | 3  | 1  | 6  | 5  | 2  | 8  | 9  | 4  | 10 | 7  |
| C10437 | 10 | 5  | 4  | 1  | 6  | 11 | 8  | 2  | 9  | 3  | 7  |
| C07710 | 1  | 3  | 5  | 9  | 11 | 4  | 10 | 2  | 8  | 6  | 7  |
| C11727 | 11 | 5  | 1  | 2  | 4  | 9  | 10 | 8  | 6  | 3  | 7  |
| C14531 | 11 | 10 | 5  | 6  | 2  | 8  | 9  | 4  | 1  | 7  | 3  |
| C09281 | 10 | 8  | 2  | 1  | 6  | 4  | 5  | 3  | 11 | 9  | 7  |
| C06687 | 10 | 9  | 11 | 4  | 6  | 2  | 8  | 7  | 1  | 3  | 5  |
| C12486 | 1  | 11 | 2  | 10 | 5  | 3  | 6  | 4  | 8  | 9  | 7  |
| C08075 | 3  | 9  | 11 | 5  | 6  | 2  | 8  | 7  | 1  | 4  | 10 |
| C12304 | 11 | 1  | 9  | 5  | 3  | 6  | 10 | 2  | 7  | 8  | 4  |
| C10196 | 10 | 2  | 5  | 8  | 7  | 4  | 11 | 3  | 6  | 1  | 9  |
| C02957 | 1  | 4  | 6  | 9  | 5  | 2  | 3  | 11 | 7  | 8  | 10 |
| C07221 | 10 | 9  | 6  | 5  | 1  | 7  | 8  | 3  | 11 | 2  | 4  |
| C11779 | 10 | 11 | 8  | 2  | 3  | 6  | 9  | 4  | 5  | 1  | 7  |
| C10383 | 10 | 11 | 2  | 5  | 4  | 9  | 7  | 8  | 1  | 6  | 3  |
| C07884 | 5  | 10 | 11 | 6  | 8  | 1  | 3  | 2  | 4  | 9  | 7  |
| C07148 | 1  | 10 | 5  | 2  | 4  | 9  | 11 | 3  | 8  | 6  | 7  |
| C11065 | 11 | 8  | 6  | 2  | 5  | 1  | 10 | 9  | 7  | 4  | 3  |
| C10159 | 5  | 9  | 10 | 8  | 7  | 2  | 11 | 1  | 3  | 6  | 4  |
| C07440 | 3  | 10 | 5  | 11 | 1  | 8  | 6  | 9  | 2  | 4  | 7  |
| C07198 | 3  | 11 | 10 | 9  | 8  | 2  | 5  | 4  | 1  | 6  | 7  |
| C06701 | 2  | 6  | 9  | 4  | 8  | 5  | 10 | 1  | 7  | 3  | 11 |
| C14325 | 11 | 4  | 7  | 5  | 6  | 2  | 3  | 9  | 1  | 8  | 10 |
| C10933 | 11 | 6  | 4  | 2  | 3  | 5  | 1  | 10 | 8  | 7  | 9  |
| C10747 | 10 | 5  | 2  | 1  | 8  | 7  | 3  | 4  | 9  | 11 | 6  |
| C08349 | 1  | 2  | 5  | 4  | 6  | 3  | 9  | 8  | 7  | 10 | 11 |
| C12819 | 5  | 6  | 10 | 2  | 8  | 1  | 4  | 3  | 11 | 9  | 7  |
| C14467 | 2  | 11 | 8  | 10 | 5  | 6  | 3  | 1  | 4  | 7  | 9  |
| C03878 | 1  | 5  | 2  | 8  | 10 | 6  | 3  | 11 | 9  | 4  | 7  |
| C11595 | 3  | 8  | 6  | 2  | 1  | 9  | 5  | 7  | 4  | 11 | 10 |
| C15368 | 3  | 5  | 8  | 4  | 10 | 9  | 11 | 1  | 7  | 2  | 6  |
| C00038 | 1  | 5  | 8  | 2  | 4  | 6  | 9  | 3  | 10 | 11 | 7  |
| C11391 | 9  | 11 | 5  | 10 | 8  | 4  | 1  | 3  | 6  | 2  | 7  |
| C08459 | 1  | 4  | 2  | 6  | 3  | 5  | 11 | 10 | 9  | 7  | 8  |
| C09972 | 11 | 10 | 5  | 7  | 2  | 3  | 9  | 1  | 8  | 6  | 4  |
| C14208 | 3  | 1  | 11 | 6  | 5  | 8  | 9  | 4  | 7  | 10 | 2  |
| C07658 | 10 | 9  | 8  | 11 | 5  | 2  | 4  | 7  | 3  | 1  | 6  |
| C07518 | 5  | 2  | 1  | 10 | 11 | 6  | 4  | 8  | 9  | 3  | 7  |
| C08874 | 1  | 10 | 7  | 3  | 4  | 5  | 6  | 2  | 9  | 8  | 11 |



|        |    |    |    |    |    |    |    |    |    |    |    |
|--------|----|----|----|----|----|----|----|----|----|----|----|
| C12886 | 3  | 8  | 10 | 7  | 6  | 11 | 4  | 5  | 1  | 9  | 2  |
| C09361 | 2  | 10 | 8  | 11 | 7  | 6  | 4  | 3  | 5  | 1  | 9  |
| C06323 | 10 | 8  | 11 | 2  | 5  | 9  | 6  | 3  | 4  | 1  | 7  |
| C09900 | 9  | 11 | 8  | 2  | 3  | 1  | 5  | 6  | 10 | 4  | 7  |
| C01067 | 1  | 2  | 10 | 4  | 8  | 5  | 3  | 7  | 9  | 6  | 11 |
| C03734 | 6  | 2  | 9  | 10 | 8  | 4  | 1  | 5  | 11 | 3  | 7  |
| C06532 | 8  | 10 | 5  | 2  | 9  | 1  | 3  | 6  | 4  | 7  | 11 |
| C10368 | 11 | 8  | 1  | 5  | 2  | 10 | 6  | 3  | 4  | 9  | 7  |
| C04218 | 2  | 9  | 4  | 10 | 7  | 11 | 6  | 1  | 5  | 3  | 8  |
| C13206 | 10 | 9  | 6  | 11 | 5  | 1  | 8  | 7  | 3  | 2  | 4  |
| C11381 | 10 | 5  | 9  | 8  | 6  | 3  | 4  | 2  | 11 | 7  | 1  |
| C04871 | 5  | 3  | 11 | 9  | 1  | 6  | 2  | 4  | 10 | 7  | 8  |
| C10576 | 6  | 5  | 10 | 11 | 3  | 9  | 4  | 1  | 7  | 2  | 8  |
| C15474 | 5  | 10 | 11 | 9  | 8  | 6  | 2  | 1  | 3  | 7  | 4  |
| C10556 | 2  | 8  | 10 | 6  | 11 | 5  | 3  | 9  | 4  | 1  | 7  |
| C07295 | 9  | 5  | 10 | 11 | 3  | 6  | 2  | 1  | 4  | 7  | 8  |
| C08420 | 10 | 4  | 5  | 11 | 6  | 3  | 9  | 2  | 8  | 1  | 7  |
| C13526 | 1  | 11 | 3  | 10 | 6  | 2  | 5  | 9  | 8  | 7  | 4  |
| C11686 | 11 | 4  | 6  | 8  | 7  | 9  | 3  | 2  | 5  | 1  | 10 |
| C11218 | 5  | 6  | 10 | 8  | 1  | 2  | 3  | 7  | 9  | 4  | 11 |
| C10967 | 5  | 10 | 2  | 7  | 4  | 9  | 8  | 3  | 1  | 11 | 6  |
| C12798 | 10 | 5  | 2  | 4  | 11 | 7  | 6  | 1  | 3  | 9  | 8  |
| C15858 | 9  | 8  | 10 | 5  | 2  | 3  | 6  | 11 | 1  | 4  | 7  |
| C09627 | 2  | 8  | 9  | 6  | 3  | 10 | 5  | 11 | 1  | 4  | 7  |
| C07829 | 11 | 5  | 4  | 10 | 9  | 8  | 2  | 6  | 3  | 1  | 7  |
| C05079 | 10 | 9  | 5  | 4  | 2  | 11 | 6  | 8  | 3  | 7  | 1  |
| C07556 | 5  | 10 | 2  | 11 | 6  | 3  | 8  | 7  | 1  | 9  | 4  |
| C07107 | 5  | 10 | 11 | 9  | 8  | 4  | 1  | 3  | 2  | 6  | 7  |
| C06008 | 5  | 8  | 6  | 2  | 1  | 10 | 11 | 4  | 9  | 3  | 7  |
| C15756 | 1  | 7  | 9  | 5  | 2  | 6  | 10 | 11 | 8  | 3  | 4  |
| C06439 | 3  | 2  | 6  | 7  | 1  | 11 | 4  | 5  | 10 | 9  | 8  |
| C11361 | 3  | 1  | 11 | 10 | 5  | 2  | 8  | 6  | 4  | 9  | 7  |
| C05126 | 5  | 10 | 11 | 1  | 7  | 4  | 6  | 8  | 2  | 3  | 9  |
| C09382 | 10 | 2  | 9  | 6  | 8  | 11 | 4  | 3  | 1  | 7  | 5  |
| C08567 | 10 | 5  | 8  | 11 | 1  | 4  | 2  | 3  | 9  | 7  | 6  |
| C07943 | 5  | 11 | 10 | 1  | 8  | 2  | 4  | 3  | 9  | 7  | 6  |
| C09305 | 8  | 2  | 5  | 6  | 9  | 3  | 11 | 1  | 10 | 4  | 7  |
| C08072 | 3  | 11 | 5  | 9  | 6  | 2  | 10 | 1  | 8  | 7  | 4  |
| C08839 | 3  | 5  | 10 | 9  | 11 | 8  | 6  | 4  | 7  | 1  | 2  |
| C14557 | 11 | 7  | 6  | 4  | 5  | 8  | 1  | 9  | 2  | 3  | 10 |
| C09625 | 9  | 11 | 3  | 2  | 5  | 10 | 8  | 1  | 7  | 6  | 4  |
| C08811 | 9  | 3  | 2  | 10 | 7  | 5  | 8  | 4  | 11 | 1  | 6  |
| C08365 | 3  | 1  | 2  | 11 | 6  | 7  | 9  | 8  | 5  | 4  | 10 |

|        |    |    |    |    |    |    |    |    |    |    |    |
|--------|----|----|----|----|----|----|----|----|----|----|----|
| C14688 | 11 | 1  | 8  | 4  | 9  | 10 | 3  | 2  | 5  | 7  | 6  |
| C14546 | 3  | 5  | 10 | 1  | 11 | 9  | 7  | 8  | 2  | 6  | 4  |
| C05334 | 10 | 5  | 8  | 11 | 3  | 2  | 9  | 7  | 4  | 1  | 6  |
| C07539 | 11 | 1  | 2  | 3  | 5  | 10 | 8  | 6  | 9  | 4  | 7  |
| C10812 | 11 | 10 | 5  | 9  | 1  | 8  | 4  | 2  | 6  | 3  | 7  |
| C04205 | 3  | 5  | 8  | 6  | 9  | 1  | 10 | 4  | 2  | 11 | 7  |
| C04036 | 6  | 2  | 3  | 8  | 7  | 4  | 11 | 10 | 5  | 1  | 9  |
| C03634 | 10 | 3  | 1  | 5  | 4  | 2  | 6  | 8  | 11 | 7  | 9  |
| C10870 | 10 | 2  | 4  | 11 | 5  | 8  | 3  | 7  | 9  | 6  | 1  |
| C03188 | 5  | 3  | 10 | 1  | 9  | 2  | 11 | 6  | 8  | 4  | 7  |
| C04587 | 6  | 2  | 8  | 9  | 10 | 4  | 3  | 1  | 11 | 7  | 5  |
| C15549 | 10 | 1  | 5  | 9  | 8  | 11 | 3  | 6  | 2  | 4  | 7  |
| C04715 | 9  | 1  | 4  | 3  | 7  | 2  | 5  | 10 | 11 | 8  | 6  |
| C15270 | 8  | 4  | 11 | 9  | 5  | 10 | 6  | 3  | 1  | 2  | 7  |
| C08388 | 9  | 2  | 11 | 3  | 5  | 4  | 8  | 1  | 7  | 6  | 10 |
| C13051 | 8  | 2  | 1  | 10 | 4  | 9  | 6  | 7  | 11 | 3  | 5  |
| C11527 | 11 | 5  | 8  | 2  | 9  | 1  | 10 | 6  | 7  | 4  | 3  |
| C10066 | 9  | 3  | 8  | 4  | 7  | 1  | 5  | 11 | 2  | 6  | 10 |
| C11165 | 3  | 9  | 11 | 5  | 1  | 6  | 2  | 8  | 4  | 10 | 7  |
| C09951 | 10 | 11 | 9  | 4  | 5  | 6  | 3  | 2  | 1  | 7  | 8  |
| C09834 | 3  | 5  | 4  | 11 | 6  | 7  | 10 | 9  | 8  | 2  | 1  |
| C07551 | 5  | 10 | 2  | 11 | 1  | 4  | 6  | 3  | 7  | 8  | 9  |
| C09729 | 9  | 5  | 11 | 3  | 7  | 8  | 10 | 4  | 1  | 6  | 2  |
| C00747 | 8  | 2  | 11 | 1  | 5  | 6  | 10 | 3  | 9  | 4  | 7  |
| C11240 | 11 | 4  | 10 | 6  | 9  | 2  | 7  | 3  | 8  | 5  | 1  |
| C11906 | 8  | 6  | 3  | 2  | 5  | 10 | 4  | 11 | 9  | 1  | 7  |
| C11687 | 11 | 1  | 5  | 2  | 4  | 10 | 8  | 6  | 9  | 7  | 3  |
| C03505 | 2  | 8  | 3  | 1  | 6  | 10 | 7  | 11 | 9  | 4  | 5  |
| C07117 | 3  | 5  | 10 | 11 | 4  | 6  | 9  | 2  | 1  | 7  | 8  |
| C01386 | 11 | 1  | 5  | 6  | 3  | 10 | 8  | 2  | 7  | 9  | 4  |
| C09633 | 9  | 10 | 2  | 8  | 7  | 1  | 3  | 6  | 4  | 5  | 11 |
| C07062 | 3  | 10 | 5  | 11 | 1  | 9  | 2  | 4  | 8  | 7  | 6  |
| C08517 | 10 | 2  | 8  | 1  | 7  | 5  | 11 | 3  | 9  | 4  | 6  |
| C01546 | 2  | 5  | 8  | 11 | 10 | 1  | 9  | 3  | 4  | 6  | 7  |
| C02896 | 5  | 6  | 2  | 8  | 10 | 1  | 9  | 11 | 4  | 3  | 7  |
| C09198 | 1  | 3  | 2  | 9  | 10 | 11 | 5  | 6  | 7  | 8  | 4  |
| C07016 | 3  | 5  | 9  | 6  | 11 | 2  | 10 | 7  | 4  | 1  | 8  |
| C10986 | 11 | 3  | 9  | 1  | 10 | 7  | 6  | 5  | 4  | 8  | 2  |
| C08837 | 9  | 1  | 5  | 11 | 8  | 3  | 4  | 6  | 7  | 2  | 10 |
| C08331 | 6  | 5  | 2  | 4  | 10 | 1  | 11 | 8  | 3  | 7  | 9  |
| C15688 | 9  | 1  | 4  | 10 | 11 | 5  | 6  | 3  | 2  | 7  | 8  |
| C14275 | 11 | 5  | 2  | 10 | 4  | 8  | 1  | 9  | 6  | 3  | 7  |
| C01408 | 11 | 5  | 8  | 1  | 10 | 2  | 6  | 7  | 9  | 3  | 4  |

|        |    |    |    |    |    |    |    |    |    |    |    |
|--------|----|----|----|----|----|----|----|----|----|----|----|
| C14411 | 11 | 8  | 6  | 4  | 5  | 2  | 1  | 3  | 10 | 9  | 7  |
| C10188 | 10 | 11 | 6  | 4  | 3  | 1  | 8  | 7  | 5  | 2  | 9  |
| C08236 | 1  | 2  | 5  | 10 | 7  | 8  | 3  | 11 | 6  | 9  | 4  |
| C03725 | 8  | 7  | 6  | 2  | 1  | 3  | 9  | 4  | 10 | 5  | 11 |
| C14290 | 10 | 5  | 4  | 2  | 9  | 1  | 11 | 6  | 3  | 8  | 7  |
| C10636 | 10 | 11 | 7  | 3  | 6  | 4  | 9  | 2  | 5  | 8  | 1  |
| C08800 | 9  | 7  | 2  | 1  | 6  | 5  | 8  | 3  | 11 | 10 | 4  |
| C08648 | 10 | 3  | 5  | 1  | 11 | 2  | 7  | 9  | 6  | 8  | 4  |
| C06972 | 10 | 5  | 11 | 2  | 8  | 3  | 6  | 4  | 1  | 9  | 7  |
| C01995 | 1  | 11 | 2  | 6  | 5  | 3  | 9  | 8  | 10 | 4  | 7  |
| C07513 | 5  | 10 | 3  | 4  | 2  | 1  | 9  | 11 | 7  | 8  | 6  |
| C12228 | 10 | 3  | 6  | 4  | 7  | 8  | 9  | 5  | 11 | 2  | 1  |
| C11074 | 5  | 11 | 4  | 2  | 7  | 8  | 9  | 3  | 10 | 1  | 6  |
| C10229 | 11 | 1  | 4  | 9  | 7  | 10 | 3  | 8  | 5  | 2  | 6  |
| C06909 | 4  | 6  | 9  | 10 | 5  | 8  | 3  | 11 | 7  | 1  | 2  |
| C08458 | 10 | 9  | 2  | 7  | 4  | 11 | 8  | 3  | 1  | 6  | 5  |
| C01728 | 1  | 2  | 10 | 8  | 6  | 5  | 11 | 4  | 9  | 7  | 3  |
| C11597 | 3  | 6  | 1  | 9  | 5  | 2  | 8  | 11 | 10 | 7  | 4  |
| C10717 | 1  | 11 | 4  | 6  | 3  | 8  | 5  | 2  | 9  | 7  | 10 |
| C10628 | 2  | 10 | 4  | 1  | 9  | 3  | 6  | 8  | 7  | 11 | 5  |
| C07661 | 9  | 10 | 11 | 5  | 8  | 4  | 1  | 6  | 3  | 2  | 7  |
| C07519 | 11 | 2  | 10 | 5  | 6  | 1  | 4  | 8  | 7  | 3  | 9  |
| C08264 | 5  | 6  | 2  | 4  | 8  | 10 | 11 | 7  | 1  | 3  | 9  |
| C02306 | 11 | 2  | 4  | 5  | 6  | 1  | 7  | 8  | 10 | 9  | 3  |
| C01523 | 3  | 1  | 6  | 5  | 7  | 8  | 11 | 4  | 2  | 9  | 10 |
| C13806 | 6  | 5  | 10 | 8  | 1  | 2  | 7  | 4  | 3  | 9  | 11 |
| C14261 | 3  | 11 | 8  | 5  | 9  | 1  | 7  | 6  | 10 | 2  | 4  |
| C10524 | 10 | 1  | 3  | 2  | 5  | 9  | 6  | 7  | 11 | 4  | 8  |
| C07042 | 10 | 11 | 8  | 5  | 1  | 4  | 7  | 3  | 6  | 2  | 9  |
| C09384 | 10 | 1  | 6  | 11 | 5  | 4  | 2  | 3  | 8  | 9  | 7  |
| C15740 | 5  | 10 | 8  | 9  | 1  | 11 | 3  | 7  | 6  | 2  | 4  |
| C07127 | 3  | 5  | 9  | 2  | 7  | 1  | 8  | 11 | 10 | 4  | 6  |
| C06347 | 10 | 5  | 9  | 11 | 3  | 8  | 6  | 2  | 4  | 1  | 7  |
| C02899 | 8  | 5  | 10 | 2  | 1  | 6  | 4  | 11 | 7  | 3  | 9  |
| C10451 | 9  | 11 | 10 | 2  | 5  | 4  | 6  | 7  | 8  | 3  | 1  |
| C08983 | 1  | 10 | 3  | 8  | 5  | 2  | 7  | 4  | 6  | 9  | 11 |
| C07971 | 11 | 10 | 9  | 1  | 2  | 5  | 3  | 7  | 4  | 8  | 6  |
| C00849 | 11 | 10 | 1  | 5  | 9  | 2  | 3  | 8  | 6  | 7  | 4  |
| C02956 | 1  | 3  | 4  | 8  | 5  | 7  | 11 | 10 | 6  | 2  | 9  |
| C13860 | 3  | 1  | 7  | 10 | 8  | 4  | 11 | 9  | 6  | 2  | 5  |
| C09916 | 11 | 2  | 9  | 7  | 8  | 6  | 10 | 3  | 4  | 1  | 5  |
| C09808 | 11 | 10 | 8  | 5  | 7  | 2  | 6  | 9  | 3  | 1  | 4  |
| C08123 | 9  | 10 | 1  | 7  | 5  | 6  | 3  | 11 | 2  | 4  | 8  |

|        |    |    |    |    |    |    |    |    |    |    |    |
|--------|----|----|----|----|----|----|----|----|----|----|----|
| C09049 | 11 | 10 | 5  | 1  | 8  | 4  | 7  | 3  | 2  | 6  | 9  |
| C09206 | 10 | 6  | 7  | 4  | 11 | 2  | 3  | 1  | 5  | 8  | 9  |
| C07236 | 4  | 9  | 10 | 6  | 11 | 2  | 3  | 5  | 8  | 7  | 1  |
| C14345 | 11 | 10 | 4  | 9  | 1  | 7  | 3  | 2  | 8  | 5  | 6  |
| C14738 | 3  | 8  | 6  | 5  | 7  | 11 | 4  | 9  | 2  | 1  | 10 |
| C03039 | 9  | 3  | 4  | 6  | 11 | 1  | 2  | 5  | 7  | 10 | 8  |
| C01420 | 5  | 6  | 2  | 8  | 10 | 1  | 9  | 4  | 11 | 7  | 3  |
| C10032 | 10 | 11 | 5  | 4  | 1  | 8  | 7  | 3  | 9  | 6  | 2  |
| C14460 | 11 | 10 | 5  | 7  | 8  | 3  | 4  | 6  | 9  | 1  | 2  |
| C09615 | 10 | 5  | 3  | 9  | 1  | 4  | 2  | 11 | 8  | 7  | 6  |
| C01875 | 9  | 11 | 5  | 1  | 4  | 6  | 2  | 3  | 10 | 8  | 7  |
| C12049 | 9  | 1  | 11 | 4  | 2  | 10 | 5  | 7  | 3  | 8  | 6  |
| C07400 | 11 | 2  | 10 | 6  | 8  | 5  | 3  | 1  | 4  | 7  | 9  |
| C01770 | 1  | 5  | 2  | 11 | 10 | 3  | 9  | 8  | 4  | 6  | 7  |
| C07844 | 10 | 1  | 11 | 2  | 3  | 6  | 5  | 4  | 7  | 8  | 9  |
| C08394 | 9  | 8  | 5  | 10 | 1  | 11 | 3  | 7  | 2  | 6  | 4  |
| C02821 | 1  | 2  | 11 | 5  | 3  | 8  | 6  | 9  | 4  | 10 | 7  |
| C09224 | 10 | 11 | 5  | 9  | 8  | 6  | 3  | 4  | 7  | 1  | 2  |
| C13786 | 10 | 3  | 1  | 2  | 6  | 4  | 8  | 7  | 11 | 9  | 5  |
| C06955 | 10 | 5  | 2  | 3  | 11 | 9  | 8  | 6  | 1  | 4  | 7  |
| C00551 | 1  | 2  | 9  | 4  | 10 | 3  | 11 | 7  | 8  | 6  | 5  |
| C13110 | 10 | 11 | 7  | 5  | 6  | 3  | 1  | 2  | 4  | 9  | 8  |
| C14189 | 10 | 11 | 3  | 8  | 2  | 4  | 1  | 5  | 6  | 9  | 7  |
| C03743 | 11 | 2  | 6  | 8  | 4  | 5  | 1  | 9  | 3  | 7  | 10 |
| C08511 | 9  | 6  | 4  | 10 | 11 | 3  | 2  | 5  | 1  | 7  | 8  |
| C16436 | 5  | 6  | 2  | 1  | 8  | 10 | 4  | 9  | 11 | 3  | 7  |
| C03448 | 8  | 2  | 11 | 9  | 5  | 10 | 4  | 1  | 3  | 6  | 7  |
| C15432 | 3  | 10 | 9  | 6  | 7  | 5  | 11 | 4  | 8  | 2  | 1  |
| C02726 | 4  | 2  | 9  | 5  | 10 | 1  | 3  | 7  | 8  | 6  | 11 |
| C09342 | 10 | 11 | 1  | 4  | 9  | 3  | 8  | 7  | 6  | 5  | 2  |
| C09226 | 10 | 11 | 5  | 3  | 7  | 2  | 1  | 6  | 4  | 8  | 9  |
| C00728 | 4  | 9  | 6  | 7  | 11 | 5  | 1  | 10 | 2  | 3  | 8  |
| C00765 | 1  | 11 | 5  | 10 | 8  | 2  | 9  | 6  | 7  | 3  | 4  |
| C05231 | 5  | 2  | 1  | 3  | 11 | 9  | 6  | 8  | 4  | 7  | 10 |
| C02717 | 10 | 5  | 8  | 3  | 11 | 4  | 2  | 9  | 6  | 7  | 1  |
| C14281 | 8  | 10 | 11 | 9  | 7  | 1  | 5  | 3  | 6  | 4  | 2  |
| C13342 | 11 | 5  | 1  | 9  | 6  | 7  | 2  | 3  | 8  | 4  | 10 |
| C11323 | 11 | 1  | 2  | 3  | 4  | 5  | 10 | 9  | 7  | 6  | 8  |
| C10935 | 9  | 11 | 5  | 4  | 2  | 10 | 1  | 6  | 3  | 8  | 7  |
| C10395 | 5  | 11 | 1  | 8  | 9  | 6  | 10 | 3  | 2  | 7  | 4  |
| C11841 | 2  | 5  | 9  | 8  | 3  | 7  | 6  | 4  | 11 | 10 | 1  |
| C11277 | 4  | 11 | 6  | 9  | 10 | 1  | 5  | 3  | 8  | 7  | 2  |
| C10467 | 10 | 4  | 6  | 9  | 11 | 8  | 3  | 2  | 7  | 5  | 1  |

|        |    |    |    |    |    |    |    |    |    |    |    |
|--------|----|----|----|----|----|----|----|----|----|----|----|
| C15726 | 5  | 9  | 1  | 2  | 6  | 3  | 4  | 8  | 7  | 10 | 11 |
| C08299 | 5  | 10 | 11 | 4  | 1  | 2  | 3  | 8  | 6  | 9  | 7  |
| C14258 | 11 | 3  | 1  | 9  | 10 | 5  | 6  | 2  | 8  | 7  | 4  |
| C10708 | 11 | 4  | 1  | 6  | 7  | 8  | 5  | 10 | 3  | 2  | 9  |
| C08753 | 5  | 4  | 1  | 11 | 2  | 7  | 6  | 8  | 3  | 9  | 10 |
| C14464 | 11 | 5  | 3  | 2  | 8  | 4  | 9  | 10 | 1  | 6  | 7  |
| C10555 | 6  | 5  | 8  | 10 | 1  | 2  | 4  | 9  | 11 | 3  | 7  |
| C12054 | 10 | 9  | 1  | 11 | 2  | 5  | 3  | 7  | 4  | 6  | 8  |
| C07224 | 10 | 5  | 4  | 3  | 2  | 8  | 11 | 1  | 6  | 9  | 7  |
| C06342 | 2  | 8  | 5  | 10 | 11 | 9  | 7  | 3  | 4  | 1  | 6  |
| C09075 | 3  | 4  | 9  | 8  | 5  | 11 | 7  | 1  | 10 | 6  | 2  |
| C03514 | 10 | 1  | 9  | 6  | 8  | 3  | 2  | 5  | 11 | 4  | 7  |
| C14133 | 11 | 3  | 10 | 1  | 9  | 6  | 8  | 2  | 5  | 7  | 4  |
| C07279 | 6  | 3  | 1  | 9  | 2  | 10 | 11 | 5  | 4  | 7  | 8  |
| C08922 | 10 | 7  | 4  | 1  | 9  | 5  | 3  | 6  | 11 | 8  | 2  |
| C15441 | 3  | 1  | 8  | 2  | 7  | 9  | 5  | 4  | 6  | 10 | 11 |
| C07552 | 11 | 10 | 3  | 9  | 1  | 5  | 2  | 7  | 8  | 4  | 6  |
| C07049 | 5  | 10 | 11 | 3  | 2  | 9  | 4  | 8  | 6  | 1  | 7  |
| C09773 | 1  | 9  | 10 | 3  | 2  | 5  | 4  | 6  | 11 | 8  | 7  |
| C07416 | 5  | 11 | 8  | 4  | 6  | 7  | 2  | 10 | 3  | 1  | 9  |
| C02314 | 3  | 5  | 10 | 4  | 2  | 1  | 6  | 9  | 8  | 11 | 7  |
| C15522 | 5  | 8  | 10 | 2  | 9  | 6  | 4  | 7  | 3  | 11 | 1  |
| C07813 | 3  | 10 | 5  | 2  | 1  | 8  | 11 | 4  | 6  | 9  | 7  |
| C14205 | 11 | 3  | 10 | 6  | 5  | 8  | 4  | 2  | 7  | 1  | 9  |
| C11225 | 10 | 1  | 3  | 9  | 2  | 11 | 8  | 5  | 4  | 6  | 7  |
| C04114 | 5  | 2  | 8  | 1  | 3  | 11 | 9  | 6  | 10 | 4  | 7  |
| C14270 | 11 | 5  | 8  | 2  | 6  | 1  | 4  | 7  | 9  | 10 | 3  |
| C09746 | 10 | 9  | 6  | 8  | 3  | 1  | 11 | 4  | 2  | 5  | 7  |
| C15228 | 3  | 2  | 8  | 9  | 7  | 11 | 4  | 1  | 10 | 6  | 5  |
| C09637 | 9  | 10 | 6  | 2  | 8  | 1  | 11 | 3  | 5  | 4  | 7  |
| C16485 | 11 | 8  | 5  | 10 | 9  | 6  | 7  | 4  | 2  | 1  | 3  |
| C04264 | 6  | 8  | 5  | 1  | 2  | 10 | 9  | 3  | 11 | 7  | 4  |
| C06914 | 9  | 10 | 8  | 6  | 5  | 1  | 3  | 11 | 2  | 4  | 7  |
| C07571 | 5  | 10 | 11 | 3  | 9  | 6  | 2  | 7  | 1  | 4  | 8  |
| C12166 | 10 | 3  | 11 | 6  | 8  | 5  | 2  | 1  | 9  | 4  | 7  |
| C03584 | 6  | 9  | 2  | 4  | 8  | 5  | 1  | 7  | 10 | 11 | 3  |
| C15751 | 5  | 9  | 4  | 8  | 7  | 2  | 10 | 3  | 11 | 1  | 6  |
| C00629 | 1  | 2  | 8  | 6  | 9  | 5  | 4  | 10 | 11 | 7  | 3  |
| C13937 | 3  | 7  | 9  | 4  | 8  | 11 | 1  | 6  | 5  | 10 | 2  |
| C10983 | 11 | 9  | 10 | 2  | 3  | 1  | 7  | 5  | 8  | 4  | 6  |
| C07834 | 11 | 1  | 3  | 5  | 10 | 6  | 7  | 2  | 9  | 8  | 4  |
| C03754 | 5  | 2  | 9  | 10 | 4  | 1  | 8  | 6  | 11 | 3  | 7  |
| C08617 | 1  | 10 | 3  | 5  | 9  | 2  | 4  | 6  | 8  | 11 | 7  |

|        |    |    |    |    |    |    |    |    |    |    |    |
|--------|----|----|----|----|----|----|----|----|----|----|----|
| C10149 | 5  | 6  | 1  | 10 | 8  | 4  | 2  | 11 | 9  | 3  | 7  |
| C08268 | 5  | 6  | 10 | 2  | 8  | 4  | 1  | 7  | 9  | 3  | 11 |
| C13844 | 9  | 2  | 8  | 10 | 5  | 7  | 3  | 11 | 1  | 4  | 6  |
| C08103 | 10 | 9  | 11 | 5  | 6  | 3  | 1  | 8  | 7  | 2  | 4  |
| C12662 | 9  | 6  | 8  | 10 | 11 | 1  | 2  | 5  | 7  | 3  | 4  |
| C12753 | 10 | 3  | 11 | 9  | 2  | 5  | 1  | 4  | 6  | 8  | 7  |
| C00210 | 8  | 2  | 5  | 6  | 3  | 11 | 9  | 1  | 4  | 7  | 10 |
| C06359 | 9  | 10 | 5  | 11 | 6  | 2  | 8  | 1  | 7  | 3  | 4  |
| C07750 | 10 | 1  | 11 | 9  | 7  | 2  | 6  | 4  | 8  | 5  | 3  |
| C13837 | 5  | 4  | 2  | 6  | 8  | 7  | 10 | 3  | 9  | 11 | 1  |
| C08571 | 9  | 11 | 5  | 10 | 1  | 2  | 6  | 3  | 7  | 4  | 8  |
| C03987 | 5  | 7  | 4  | 2  | 3  | 6  | 10 | 9  | 11 | 8  | 1  |
| C01868 | 2  | 8  | 9  | 5  | 11 | 6  | 7  | 3  | 10 | 4  | 1  |
| C01158 | 1  | 10 | 4  | 9  | 11 | 3  | 7  | 6  | 5  | 8  | 2  |
| C07240 | 3  | 1  | 9  | 8  | 11 | 10 | 5  | 4  | 2  | 7  | 6  |
| C14199 | 11 | 5  | 4  | 6  | 8  | 7  | 9  | 3  | 10 | 1  | 2  |
| C16217 | 3  | 5  | 1  | 9  | 6  | 7  | 11 | 4  | 10 | 8  | 2  |
| C02704 | 2  | 10 | 1  | 5  | 4  | 8  | 6  | 11 | 3  | 9  | 7  |
| C07356 | 10 | 11 | 5  | 8  | 1  | 3  | 9  | 2  | 6  | 4  | 7  |
| C13812 | 3  | 7  | 8  | 2  | 4  | 10 | 11 | 5  | 6  | 1  | 9  |
| C11795 | 11 | 10 | 5  | 1  | 3  | 7  | 2  | 8  | 9  | 4  | 6  |
| C00892 | 2  | 6  | 8  | 5  | 4  | 1  | 9  | 10 | 11 | 3  | 7  |
| C14420 | 11 | 10 | 9  | 2  | 1  | 3  | 8  | 5  | 6  | 4  | 7  |
| C07632 | 3  | 2  | 8  | 6  | 5  | 1  | 4  | 10 | 7  | 11 | 9  |
| C07502 | 11 | 5  | 1  | 6  | 10 | 8  | 2  | 4  | 9  | 3  | 7  |
| C04360 | 1  | 10 | 11 | 7  | 8  | 2  | 5  | 3  | 6  | 9  | 4  |
| C11760 | 10 | 9  | 7  | 4  | 8  | 1  | 3  | 11 | 5  | 2  | 6  |
| C07569 | 5  | 4  | 1  | 11 | 6  | 9  | 2  | 10 | 3  | 8  | 7  |
| C02509 | 2  | 8  | 7  | 11 | 5  | 1  | 3  | 10 | 6  | 9  | 4  |
| C09955 | 11 | 5  | 10 | 3  | 2  | 8  | 4  | 9  | 1  | 7  | 6  |
| C11618 | 10 | 5  | 9  | 11 | 8  | 4  | 6  | 3  | 2  | 7  | 1  |
| C11037 | 11 | 6  | 1  | 5  | 8  | 3  | 9  | 4  | 10 | 2  | 7  |
| C07339 | 3  | 10 | 5  | 9  | 1  | 8  | 4  | 11 | 6  | 2  | 7  |
| C00908 | 10 | 9  | 3  | 6  | 1  | 11 | 2  | 5  | 8  | 4  | 7  |
| C01765 | 9  | 1  | 11 | 8  | 2  | 10 | 7  | 6  | 5  | 4  | 3  |
| C06879 | 10 | 5  | 9  | 6  | 1  | 11 | 3  | 8  | 4  | 2  | 7  |
| C07497 | 11 | 10 | 5  | 3  | 1  | 9  | 2  | 4  | 6  | 7  | 8  |
| C09026 | 10 | 5  | 1  | 11 | 6  | 7  | 3  | 4  | 8  | 9  | 2  |
| C08946 | 10 | 3  | 9  | 4  | 6  | 1  | 5  | 7  | 11 | 2  | 8  |
| C06746 | 2  | 8  | 5  | 9  | 7  | 6  | 1  | 10 | 11 | 3  | 4  |
| C10569 | 10 | 11 | 6  | 4  | 2  | 7  | 3  | 9  | 8  | 1  | 5  |
| C13758 | 3  | 10 | 5  | 1  | 4  | 2  | 8  | 9  | 6  | 11 | 7  |
| C11754 | 10 | 9  | 5  | 6  | 8  | 1  | 2  | 11 | 7  | 4  | 3  |

|        |    |    |    |    |    |    |    |    |    |    |    |
|--------|----|----|----|----|----|----|----|----|----|----|----|
| C02216 | 4  | 3  | 1  | 8  | 10 | 5  | 9  | 6  | 11 | 2  | 7  |
| C12962 | 6  | 4  | 5  | 3  | 2  | 9  | 1  | 11 | 10 | 7  | 8  |
| C08282 | 3  | 7  | 9  | 8  | 11 | 10 | 1  | 2  | 6  | 5  | 4  |
| C07846 | 5  | 10 | 2  | 11 | 1  | 4  | 9  | 6  | 7  | 8  | 3  |
| C03338 | 2  | 8  | 11 | 1  | 7  | 9  | 6  | 5  | 10 | 4  | 3  |
| C11221 | 6  | 5  | 3  | 1  | 8  | 4  | 10 | 7  | 11 | 9  | 2  |
| C14422 | 11 | 5  | 6  | 3  | 2  | 10 | 1  | 9  | 4  | 8  | 7  |
| C05860 | 4  | 2  | 1  | 6  | 3  | 7  | 8  | 10 | 5  | 9  | 11 |
| C10656 | 3  | 10 | 11 | 2  | 1  | 5  | 8  | 9  | 6  | 7  | 4  |
| C02277 | 3  | 11 | 1  | 8  | 9  | 10 | 2  | 5  | 7  | 6  | 4  |
| C11062 | 1  | 11 | 5  | 3  | 6  | 8  | 2  | 9  | 7  | 10 | 4  |
| C05464 | 3  | 6  | 8  | 11 | 10 | 7  | 5  | 4  | 1  | 9  | 2  |
| C16038 | 11 | 10 | 8  | 5  | 4  | 9  | 2  | 3  | 1  | 7  | 6  |
| C10614 | 10 | 5  | 9  | 11 | 1  | 6  | 4  | 2  | 7  | 3  | 8  |
| C11590 | 5  | 9  | 10 | 8  | 1  | 2  | 6  | 3  | 7  | 4  | 11 |
| C14617 | 2  | 5  | 4  | 6  | 1  | 11 | 3  | 9  | 10 | 7  | 8  |
| C10064 | 3  | 10 | 8  | 7  | 11 | 5  | 2  | 4  | 6  | 9  | 1  |
| C06834 | 9  | 3  | 2  | 5  | 1  | 8  | 4  | 11 | 10 | 6  | 7  |
| C07429 | 8  | 4  | 11 | 6  | 7  | 10 | 1  | 3  | 5  | 9  | 2  |
| C09000 | 3  | 10 | 4  | 1  | 6  | 5  | 9  | 11 | 2  | 7  | 8  |
| C14330 | 11 | 5  | 2  | 4  | 1  | 8  | 7  | 3  | 6  | 9  | 10 |
| C00928 | 1  | 5  | 2  | 8  | 6  | 11 | 3  | 9  | 10 | 4  | 7  |
| C03591 | 11 | 1  | 6  | 5  | 10 | 9  | 4  | 8  | 3  | 2  | 7  |
| C10678 | 9  | 5  | 11 | 10 | 3  | 6  | 8  | 4  | 1  | 2  | 7  |
| C08646 | 10 | 7  | 6  | 8  | 4  | 3  | 9  | 1  | 11 | 5  | 2  |
| C10523 | 10 | 4  | 1  | 7  | 11 | 6  | 8  | 3  | 5  | 9  | 2  |
| C08652 | 10 | 5  | 9  | 8  | 11 | 3  | 1  | 6  | 7  | 4  | 2  |
| C07553 | 5  | 10 | 2  | 11 | 6  | 1  | 4  | 3  | 8  | 7  | 9  |
| C06469 | 1  | 3  | 10 | 7  | 5  | 6  | 2  | 4  | 9  | 8  | 11 |
| C10391 | 10 | 11 | 8  | 5  | 2  | 6  | 7  | 3  | 1  | 4  | 9  |
| C12295 | 9  | 10 | 2  | 7  | 1  | 11 | 4  | 3  | 8  | 5  | 6  |
| C10456 | 10 | 5  | 9  | 2  | 6  | 1  | 7  | 8  | 4  | 3  | 11 |
| C04403 | 1  | 7  | 4  | 9  | 2  | 8  | 10 | 3  | 6  | 11 | 5  |
| C14077 | 8  | 11 | 2  | 6  | 10 | 1  | 4  | 5  | 3  | 7  | 9  |
| C11745 | 5  | 8  | 2  | 3  | 6  | 1  | 9  | 7  | 10 | 11 | 4  |
| C07677 | 10 | 5  | 4  | 1  | 3  | 2  | 9  | 8  | 11 | 6  | 7  |
| C16488 | 1  | 5  | 2  | 4  | 7  | 6  | 10 | 3  | 8  | 11 | 9  |
| C07607 | 3  | 10 | 1  | 5  | 2  | 8  | 7  | 9  | 4  | 11 | 6  |
| C08594 | 9  | 8  | 10 | 6  | 5  | 11 | 3  | 1  | 2  | 4  | 7  |
| C07669 | 10 | 11 | 4  | 5  | 3  | 9  | 1  | 2  | 8  | 6  | 7  |
| C09492 | 9  | 10 | 1  | 3  | 4  | 8  | 11 | 2  | 6  | 7  | 5  |
| C10182 | 10 | 1  | 5  | 3  | 11 | 2  | 9  | 7  | 6  | 8  | 4  |
| C14313 | 10 | 7  | 8  | 1  | 9  | 3  | 11 | 4  | 2  | 5  | 6  |

|        |    |    |    |    |    |    |    |    |    |    |    |
|--------|----|----|----|----|----|----|----|----|----|----|----|
| C07582 | 1  | 8  | 5  | 2  | 4  | 10 | 11 | 9  | 7  | 3  | 6  |
| C03313 | 8  | 5  | 6  | 10 | 11 | 1  | 2  | 9  | 4  | 3  | 7  |
| C14132 | 11 | 3  | 10 | 5  | 7  | 2  | 4  | 8  | 1  | 6  | 9  |
| C09760 | 3  | 4  | 2  | 1  | 11 | 8  | 9  | 10 | 6  | 5  | 7  |
| C09943 | 11 | 1  | 4  | 6  | 8  | 9  | 10 | 3  | 2  | 7  | 5  |
| C10234 | 10 | 8  | 5  | 1  | 2  | 3  | 6  | 4  | 7  | 9  | 11 |
| C10088 | 10 | 8  | 1  | 4  | 7  | 2  | 5  | 3  | 9  | 6  | 11 |
| C07326 | 1  | 2  | 6  | 8  | 10 | 7  | 11 | 5  | 3  | 9  | 4  |
| C10957 | 5  | 10 | 2  | 6  | 8  | 1  | 9  | 11 | 7  | 3  | 4  |
| C09693 | 9  | 3  | 2  | 5  | 1  | 7  | 8  | 11 | 6  | 4  | 10 |
| C03783 | 1  | 6  | 5  | 2  | 3  | 10 | 8  | 9  | 7  | 4  | 11 |
| C06872 | 3  | 10 | 7  | 4  | 1  | 5  | 11 | 6  | 8  | 2  | 9  |
| C06736 | 2  | 8  | 3  | 1  | 4  | 6  | 11 | 10 | 5  | 7  | 9  |
| C14586 | 3  | 2  | 1  | 11 | 5  | 4  | 7  | 6  | 8  | 10 | 9  |
| C02681 | 3  | 8  | 7  | 6  | 9  | 11 | 4  | 2  | 5  | 10 | 1  |
| C06390 | 3  | 8  | 4  | 5  | 2  | 7  | 10 | 11 | 6  | 1  | 9  |
| C12050 | 9  | 5  | 11 | 6  | 3  | 7  | 1  | 10 | 4  | 2  | 8  |
| C03348 | 1  | 9  | 7  | 10 | 6  | 2  | 4  | 8  | 11 | 3  | 5  |
| C02828 | 6  | 9  | 1  | 7  | 2  | 11 | 3  | 5  | 8  | 4  | 10 |
| C03139 | 5  | 6  | 2  | 8  | 4  | 11 | 3  | 10 | 9  | 7  | 1  |
| C11797 | 11 | 10 | 5  | 3  | 9  | 4  | 1  | 2  | 8  | 6  | 7  |
| C05203 | 10 | 5  | 9  | 8  | 2  | 3  | 11 | 4  | 1  | 7  | 6  |
| C09423 | 11 | 10 | 8  | 9  | 6  | 4  | 3  | 5  | 1  | 2  | 7  |
| C07668 | 5  | 10 | 4  | 11 | 1  | 9  | 3  | 2  | 6  | 8  | 7  |
| C04000 | 2  | 6  | 8  | 9  | 1  | 7  | 5  | 3  | 10 | 4  | 11 |
| C10430 | 11 | 9  | 10 | 5  | 3  | 4  | 7  | 1  | 2  | 6  | 8  |
| C12023 | 11 | 10 | 9  | 2  | 7  | 8  | 4  | 1  | 6  | 5  | 3  |
| C15623 | 8  | 5  | 4  | 11 | 9  | 1  | 2  | 3  | 10 | 7  | 6  |
| C07570 | 5  | 10 | 11 | 3  | 9  | 1  | 4  | 7  | 8  | 6  | 2  |
| C05198 | 5  | 8  | 1  | 2  | 4  | 6  | 9  | 10 | 11 | 3  | 7  |
| C09220 | 11 | 1  | 3  | 9  | 7  | 2  | 5  | 8  | 4  | 10 | 6  |
| C07470 | 5  | 11 | 10 | 9  | 8  | 1  | 4  | 6  | 7  | 3  | 2  |
| C06940 | 8  | 5  | 11 | 9  | 1  | 6  | 2  | 10 | 4  | 3  | 7  |
| C07252 | 5  | 10 | 6  | 11 | 1  | 2  | 8  | 3  | 7  | 9  | 4  |
| C13050 | 8  | 4  | 2  | 1  | 10 | 9  | 6  | 7  | 5  | 11 | 3  |
| C00927 | 6  | 10 | 5  | 7  | 2  | 8  | 1  | 11 | 3  | 4  | 9  |
| C11307 | 1  | 11 | 3  | 5  | 2  | 6  | 4  | 10 | 9  | 7  | 8  |
| C00809 | 9  | 8  | 2  | 11 | 5  | 6  | 1  | 3  | 10 | 4  | 7  |
| C01564 | 11 | 10 | 6  | 2  | 5  | 4  | 8  | 9  | 1  | 7  | 3  |
| C09841 | 9  | 10 | 1  | 4  | 8  | 3  | 11 | 5  | 7  | 6  | 2  |
| C08637 | 3  | 10 | 9  | 1  | 11 | 5  | 6  | 2  | 8  | 4  | 7  |
| C00503 | 1  | 2  | 3  | 5  | 8  | 6  | 9  | 10 | 11 | 7  | 4  |
| C10091 | 10 | 6  | 4  | 2  | 1  | 8  | 11 | 3  | 9  | 5  | 7  |



|        |    |    |    |    |    |    |    |    |    |    |    |
|--------|----|----|----|----|----|----|----|----|----|----|----|
| C12065 | 9  | 10 | 5  | 6  | 2  | 3  | 1  | 8  | 4  | 7  | 11 |
| C12163 | 10 | 2  | 11 | 6  | 8  | 3  | 7  | 1  | 4  | 5  | 9  |
| C06871 | 5  | 3  | 10 | 1  | 7  | 11 | 6  | 9  | 4  | 2  | 8  |
| C09639 | 9  | 3  | 2  | 1  | 11 | 10 | 6  | 5  | 8  | 7  | 4  |
| C11256 | 6  | 9  | 2  | 4  | 8  | 7  | 3  | 5  | 11 | 10 | 1  |
| C07411 | 1  | 2  | 6  | 5  | 3  | 10 | 8  | 9  | 11 | 4  | 7  |
| C04452 | 1  | 3  | 2  | 10 | 6  | 8  | 11 | 9  | 7  | 5  | 4  |
| C10142 | 10 | 11 | 1  | 4  | 8  | 9  | 7  | 6  | 3  | 5  | 2  |
| C11223 | 8  | 11 | 9  | 2  | 6  | 7  | 1  | 4  | 3  | 5  | 10 |
| C07819 | 10 | 5  | 3  | 2  | 11 | 8  | 4  | 7  | 9  | 6  | 1  |
| C11164 | 1  | 2  | 6  | 8  | 5  | 10 | 11 | 9  | 4  | 3  | 7  |
| C13038 | 3  | 1  | 2  | 11 | 5  | 6  | 8  | 9  | 10 | 4  | 7  |
| C09557 | 6  | 5  | 8  | 2  | 10 | 7  | 9  | 1  | 4  | 11 | 3  |
| C09805 | 10 | 5  | 11 | 8  | 1  | 9  | 7  | 3  | 2  | 6  | 4  |
| C07550 | 10 | 2  | 5  | 4  | 6  | 3  | 11 | 1  | 7  | 8  | 9  |
| C02590 | 7  | 4  | 2  | 8  | 9  | 1  | 3  | 10 | 5  | 6  | 11 |
| C07310 | 3  | 1  | 2  | 8  | 5  | 11 | 6  | 10 | 4  | 9  | 7  |
| C02304 | 2  | 5  | 6  | 8  | 11 | 1  | 4  | 10 | 3  | 9  | 7  |
| C11497 | 8  | 2  | 11 | 3  | 5  | 1  | 10 | 9  | 7  | 6  | 4  |
| C08130 | 1  | 3  | 2  | 5  | 10 | 4  | 11 | 6  | 9  | 7  | 8  |
| C06152 | 1  | 8  | 3  | 2  | 5  | 4  | 10 | 9  | 6  | 11 | 7  |
| C13016 | 9  | 10 | 11 | 6  | 2  | 5  | 1  | 4  | 3  | 8  | 7  |
| C01225 | 1  | 3  | 2  | 10 | 8  | 7  | 5  | 4  | 9  | 6  | 11 |
| C09854 | 3  | 5  | 7  | 6  | 9  | 11 | 2  | 4  | 8  | 1  | 10 |
| C14178 | 4  | 9  | 2  | 5  | 10 | 8  | 1  | 3  | 6  | 7  | 11 |
| C09802 | 9  | 10 | 3  | 5  | 1  | 2  | 6  | 11 | 7  | 8  | 4  |
| C08718 | 10 | 5  | 11 | 8  | 9  | 2  | 3  | 6  | 4  | 7  | 1  |
| C10742 | 5  | 11 | 10 | 6  | 3  | 8  | 9  | 7  | 4  | 1  | 2  |
| C10885 | 10 | 3  | 6  | 8  | 4  | 1  | 9  | 7  | 11 | 5  | 2  |
| C12024 | 9  | 11 | 5  | 6  | 2  | 8  | 7  | 3  | 4  | 10 | 1  |
| C07428 | 5  | 1  | 11 | 10 | 3  | 9  | 2  | 8  | 6  | 7  | 4  |
| C11771 | 5  | 2  | 9  | 6  | 7  | 3  | 10 | 1  | 8  | 11 | 4  |
| C14427 | 11 | 2  | 1  | 10 | 9  | 3  | 7  | 4  | 8  | 5  | 6  |
| C09145 | 9  | 1  | 10 | 2  | 8  | 5  | 7  | 6  | 3  | 4  | 11 |
| C07142 | 10 | 2  | 11 | 5  | 4  | 1  | 6  | 8  | 7  | 3  | 9  |
| C12656 | 3  | 10 | 4  | 6  | 1  | 11 | 5  | 8  | 9  | 2  | 7  |
| C10394 | 1  | 11 | 4  | 7  | 9  | 2  | 5  | 3  | 10 | 6  | 8  |
| C09214 | 10 | 5  | 6  | 8  | 11 | 9  | 2  | 1  | 3  | 7  | 4  |
| C14446 | 2  | 7  | 11 | 8  | 6  | 9  | 3  | 10 | 4  | 5  | 1  |
| C07711 | 3  | 9  | 5  | 10 | 1  | 11 | 6  | 4  | 7  | 2  | 8  |
| C07126 | 8  | 2  | 11 | 1  | 5  | 9  | 7  | 3  | 10 | 4  | 6  |
| C14696 | 9  | 2  | 1  | 3  | 11 | 5  | 8  | 10 | 6  | 7  | 4  |
| C02097 | 1  | 9  | 2  | 10 | 4  | 8  | 6  | 7  | 5  | 3  | 11 |

|        |    |    |    |    |    |    |    |    |    |    |    |
|--------|----|----|----|----|----|----|----|----|----|----|----|
| C14334 | 11 | 10 | 2  | 9  | 5  | 4  | 6  | 7  | 3  | 1  | 8  |
| C15992 | 3  | 9  | 11 | 8  | 5  | 4  | 10 | 6  | 2  | 1  | 7  |
| C10548 | 3  | 10 | 2  | 5  | 11 | 4  | 7  | 8  | 1  | 6  | 9  |
| C04597 | 8  | 2  | 7  | 11 | 1  | 6  | 10 | 3  | 4  | 5  | 9  |
| C08551 | 10 | 9  | 1  | 4  | 8  | 5  | 3  | 2  | 11 | 6  | 7  |
| C10938 | 11 | 5  | 1  | 2  | 10 | 3  | 6  | 7  | 8  | 9  | 4  |
| C10262 | 9  | 7  | 6  | 11 | 4  | 3  | 10 | 5  | 1  | 2  | 8  |
| C02709 | 11 | 2  | 9  | 6  | 1  | 3  | 5  | 4  | 7  | 10 | 8  |
| C02078 | 10 | 9  | 6  | 5  | 3  | 2  | 1  | 8  | 11 | 4  | 7  |
| C14255 | 3  | 1  | 2  | 10 | 4  | 11 | 6  | 5  | 9  | 8  | 7  |
| C10277 | 10 | 2  | 5  | 6  | 9  | 4  | 3  | 8  | 7  | 1  | 11 |
| C11236 | 10 | 9  | 5  | 11 | 6  | 2  | 7  | 3  | 8  | 1  | 4  |
| C10404 | 1  | 11 | 3  | 10 | 6  | 2  | 8  | 5  | 7  | 9  | 4  |
| C14171 | 10 | 7  | 9  | 2  | 6  | 5  | 8  | 3  | 1  | 11 | 4  |
| C01403 | 11 | 9  | 5  | 8  | 3  | 2  | 10 | 1  | 7  | 4  | 6  |
| C00288 | 1  | 5  | 2  | 8  | 6  | 11 | 3  | 4  | 9  | 10 | 7  |
| C03525 | 1  | 11 | 8  | 10 | 4  | 6  | 3  | 5  | 9  | 2  | 7  |
| C14263 | 8  | 2  | 10 | 11 | 7  | 9  | 1  | 3  | 6  | 4  | 5  |
| C11706 | 3  | 9  | 5  | 11 | 4  | 7  | 8  | 1  | 6  | 10 | 2  |
| C09218 | 10 | 9  | 11 | 5  | 8  | 3  | 6  | 2  | 4  | 7  | 1  |
| C08593 | 9  | 8  | 11 | 1  | 5  | 2  | 7  | 3  | 10 | 6  | 4  |
| C14760 | 8  | 9  | 10 | 3  | 5  | 11 | 6  | 2  | 7  | 4  | 1  |
| C10472 | 11 | 9  | 3  | 10 | 8  | 5  | 6  | 2  | 7  | 1  | 4  |
| C09282 | 9  | 10 | 2  | 8  | 11 | 7  | 3  | 5  | 4  | 6  | 1  |
| C03225 | 5  | 1  | 2  | 6  | 3  | 7  | 8  | 9  | 11 | 10 | 4  |
| C07458 | 8  | 11 | 5  | 2  | 9  | 10 | 4  | 6  | 1  | 7  | 3  |
| C14370 | 11 | 5  | 4  | 6  | 1  | 8  | 3  | 2  | 9  | 7  | 10 |
| C03679 | 5  | 2  | 11 | 6  | 4  | 8  | 10 | 9  | 7  | 3  | 1  |
| C07461 | 1  | 3  | 5  | 2  | 11 | 4  | 9  | 10 | 7  | 6  | 8  |
| C02945 | 3  | 8  | 9  | 10 | 2  | 6  | 5  | 7  | 1  | 11 | 4  |
| C11321 | 1  | 2  | 3  | 8  | 6  | 4  | 9  | 5  | 10 | 11 | 7  |
| C08055 | 11 | 4  | 5  | 8  | 2  | 10 | 3  | 9  | 1  | 7  | 6  |
| C06350 | 10 | 5  | 11 | 1  | 3  | 6  | 9  | 7  | 8  | 4  | 2  |
| C04131 | 5  | 2  | 6  | 4  | 8  | 10 | 11 | 1  | 3  | 9  | 7  |
| C08798 | 10 | 2  | 11 | 5  | 6  | 9  | 7  | 3  | 8  | 1  | 4  |
| C02592 | 3  | 6  | 4  | 8  | 5  | 2  | 9  | 7  | 10 | 1  | 11 |
| C04655 | 3  | 8  | 2  | 1  | 11 | 5  | 6  | 7  | 4  | 9  | 10 |
| C11703 | 5  | 10 | 3  | 4  | 2  | 1  | 9  | 11 | 6  | 8  | 7  |
| C10315 | 10 | 2  | 11 | 8  | 6  | 1  | 3  | 5  | 7  | 9  | 4  |
| C09752 | 10 | 1  | 4  | 5  | 11 | 9  | 3  | 2  | 7  | 8  | 6  |
| C14324 | 11 | 10 | 1  | 9  | 5  | 2  | 3  | 6  | 7  | 4  | 8  |
| C04433 | 9  | 7  | 2  | 1  | 3  | 5  | 11 | 4  | 10 | 6  | 8  |
| C09529 | 6  | 5  | 1  | 8  | 10 | 11 | 3  | 2  | 4  | 9  | 7  |

|        |    |    |    |    |    |    |    |    |    |    |    |
|--------|----|----|----|----|----|----|----|----|----|----|----|
| C10751 | 10 | 5  | 6  | 9  | 8  | 4  | 11 | 3  | 2  | 1  | 7  |
| C01782 | 11 | 5  | 8  | 10 | 6  | 9  | 3  | 2  | 7  | 4  | 1  |
| C11796 | 10 | 11 | 5  | 2  | 1  | 9  | 3  | 4  | 7  | 6  | 8  |
| C11787 | 10 | 11 | 5  | 7  | 1  | 6  | 3  | 8  | 2  | 9  | 4  |
| C10525 | 10 | 6  | 9  | 5  | 4  | 2  | 7  | 3  | 1  | 8  | 11 |
| C10504 | 10 | 2  | 5  | 9  | 11 | 1  | 8  | 6  | 3  | 4  | 7  |
| C10598 | 10 | 5  | 9  | 6  | 2  | 8  | 3  | 11 | 4  | 7  | 1  |
| C10017 | 10 | 3  | 1  | 7  | 4  | 2  | 11 | 8  | 5  | 6  | 9  |
| C07602 | 3  | 5  | 10 | 6  | 8  | 2  | 9  | 1  | 4  | 11 | 7  |
| C06977 | 1  | 8  | 5  | 3  | 11 | 2  | 4  | 7  | 9  | 10 | 6  |
| C06230 | 2  | 9  | 4  | 8  | 7  | 10 | 11 | 5  | 3  | 6  | 1  |
| C08381 | 3  | 9  | 8  | 5  | 10 | 7  | 2  | 6  | 11 | 1  | 4  |
| C01692 | 11 | 5  | 10 | 8  | 3  | 6  | 1  | 2  | 9  | 4  | 7  |
| C08622 | 3  | 2  | 7  | 1  | 5  | 8  | 6  | 10 | 11 | 4  | 9  |
| C06526 | 10 | 1  | 2  | 9  | 8  | 5  | 11 | 6  | 4  | 3  | 7  |
| C14309 | 11 | 3  | 1  | 8  | 6  | 7  | 2  | 9  | 4  | 5  | 10 |
| C10997 | 1  | 5  | 10 | 6  | 8  | 11 | 2  | 4  | 9  | 3  | 7  |
| C12047 | 10 | 9  | 4  | 2  | 8  | 1  | 3  | 7  | 6  | 5  | 11 |
| C09954 | 10 | 11 | 1  | 2  | 5  | 4  | 8  | 3  | 6  | 9  | 7  |
| C02033 | 10 | 7  | 6  | 11 | 5  | 3  | 8  | 2  | 1  | 9  | 4  |
| C03690 | 11 | 3  | 2  | 8  | 5  | 7  | 9  | 1  | 6  | 4  | 10 |
| C08632 | 10 | 1  | 5  | 7  | 3  | 9  | 8  | 2  | 4  | 6  | 11 |
| C07078 | 10 | 9  | 5  | 2  | 11 | 8  | 1  | 7  | 6  | 3  | 4  |
| C13524 | 10 | 11 | 5  | 8  | 9  | 2  | 4  | 3  | 1  | 6  | 7  |
| C00799 | 10 | 3  | 1  | 11 | 5  | 2  | 8  | 9  | 4  | 6  | 7  |
| C09460 | 10 | 5  | 9  | 4  | 6  | 7  | 11 | 3  | 8  | 2  | 1  |
| C14226 | 11 | 3  | 5  | 10 | 7  | 6  | 8  | 4  | 2  | 1  | 9  |
| C03837 | 2  | 1  | 8  | 9  | 11 | 6  | 10 | 3  | 7  | 5  | 4  |
| C10638 | 3  | 5  | 7  | 1  | 4  | 11 | 6  | 10 | 8  | 2  | 9  |
| C13884 | 1  | 2  | 5  | 4  | 11 | 10 | 3  | 8  | 6  | 9  | 7  |
| C02079 | 3  | 1  | 10 | 2  | 4  | 5  | 11 | 9  | 6  | 8  | 7  |
| C07671 | 3  | 10 | 5  | 9  | 11 | 7  | 1  | 2  | 6  | 8  | 4  |
| C10086 | 2  | 8  | 6  | 10 | 1  | 3  | 9  | 7  | 11 | 4  | 5  |
| C10958 | 3  | 4  | 2  | 5  | 11 | 7  | 9  | 1  | 10 | 6  | 8  |
| C15482 | 9  | 7  | 8  | 10 | 5  | 2  | 11 | 4  | 6  | 3  | 1  |
| C11269 | 5  | 10 | 9  | 1  | 4  | 3  | 6  | 11 | 2  | 7  | 8  |
| C14710 | 1  | 9  | 2  | 11 | 5  | 3  | 10 | 6  | 8  | 7  | 4  |
| C08030 | 9  | 10 | 8  | 6  | 5  | 1  | 11 | 2  | 4  | 3  | 7  |
| C11619 | 10 | 9  | 6  | 5  | 3  | 1  | 8  | 4  | 7  | 11 | 2  |
| C08602 | 9  | 8  | 2  | 3  | 7  | 1  | 11 | 4  | 5  | 6  | 10 |
| C03017 | 5  | 1  | 9  | 3  | 6  | 10 | 8  | 2  | 11 | 4  | 7  |
| C09001 | 10 | 11 | 5  | 1  | 8  | 3  | 4  | 9  | 6  | 2  | 7  |
| C14202 | 11 | 8  | 5  | 6  | 10 | 7  | 3  | 4  | 2  | 9  | 1  |

|        |    |    |    |    |    |    |    |    |    |    |    |
|--------|----|----|----|----|----|----|----|----|----|----|----|
| C08240 | 1  | 2  | 10 | 8  | 6  | 5  | 11 | 4  | 9  | 7  | 3  |
| C08169 | 3  | 9  | 10 | 5  | 11 | 1  | 2  | 6  | 7  | 8  | 4  |
| C01445 | 4  | 11 | 9  | 5  | 6  | 2  | 10 | 7  | 1  | 8  | 3  |
| C10720 | 10 | 11 | 6  | 5  | 1  | 9  | 3  | 7  | 2  | 8  | 4  |
| C05113 | 8  | 11 | 1  | 5  | 2  | 6  | 9  | 10 | 3  | 4  | 7  |
| C10716 | 10 | 5  | 2  | 11 | 8  | 1  | 6  | 9  | 3  | 4  | 7  |
| C10077 | 10 | 1  | 8  | 11 | 3  | 2  | 9  | 6  | 4  | 5  | 7  |
| C10841 | 10 | 8  | 11 | 2  | 4  | 3  | 6  | 7  | 5  | 9  | 1  |
| C08748 | 11 | 9  | 10 | 5  | 2  | 8  | 7  | 1  | 3  | 6  | 4  |
| C09022 | 10 | 5  | 2  | 8  | 11 | 9  | 1  | 3  | 7  | 6  | 4  |
| C01618 | 2  | 3  | 8  | 10 | 7  | 1  | 4  | 11 | 5  | 9  | 6  |
| C11695 | 10 | 3  | 6  | 8  | 2  | 5  | 9  | 1  | 11 | 7  | 4  |
| C10201 | 3  | 8  | 4  | 7  | 5  | 10 | 2  | 11 | 9  | 6  | 1  |
| C13777 | 10 | 2  | 1  | 5  | 4  | 8  | 9  | 3  | 7  | 11 | 6  |
| C03724 | 8  | 2  | 5  | 9  | 10 | 1  | 3  | 11 | 6  | 7  | 4  |
| C07874 | 11 | 1  | 9  | 6  | 3  | 2  | 5  | 8  | 10 | 4  | 7  |
| C09461 | 10 | 9  | 7  | 5  | 3  | 2  | 6  | 1  | 4  | 11 | 8  |
| C14213 | 6  | 10 | 9  | 2  | 4  | 3  | 5  | 7  | 1  | 8  | 11 |
| C06935 | 5  | 10 | 3  | 9  | 11 | 8  | 2  | 1  | 4  | 6  | 7  |
| C14545 | 3  | 1  | 8  | 6  | 10 | 7  | 11 | 5  | 9  | 2  | 4  |
| C08416 | 5  | 10 | 6  | 7  | 2  | 8  | 1  | 3  | 11 | 9  | 4  |
| C12007 | 1  | 5  | 8  | 10 | 7  | 9  | 3  | 2  | 6  | 11 | 4  |
| C12289 | 9  | 11 | 5  | 6  | 8  | 7  | 4  | 3  | 10 | 2  | 1  |
| C13179 | 10 | 9  | 11 | 4  | 5  | 8  | 6  | 1  | 2  | 3  | 7  |
| C15095 | 10 | 1  | 11 | 2  | 3  | 9  | 5  | 7  | 8  | 6  | 4  |
| C09747 | 2  | 3  | 8  | 9  | 10 | 5  | 1  | 11 | 7  | 4  | 6  |
| C08261 | 8  | 11 | 5  | 3  | 4  | 1  | 9  | 10 | 6  | 2  | 7  |
| C06465 | 1  | 2  | 10 | 5  | 6  | 8  | 3  | 4  | 11 | 9  | 7  |
| C06664 | 10 | 6  | 7  | 2  | 5  | 4  | 3  | 9  | 8  | 1  | 11 |
| C14210 | 3  | 5  | 9  | 6  | 10 | 8  | 7  | 11 | 4  | 1  | 2  |
| C13311 | 6  | 10 | 4  | 2  | 1  | 11 | 9  | 3  | 7  | 8  | 5  |
| C06391 | 3  | 8  | 9  | 4  | 6  | 10 | 1  | 11 | 5  | 2  | 7  |
| C04641 | 1  | 4  | 2  | 9  | 3  | 7  | 8  | 5  | 11 | 6  | 10 |
| C09908 | 9  | 11 | 5  | 10 | 8  | 1  | 2  | 4  | 3  | 6  | 7  |
| C09084 | 10 | 1  | 9  | 2  | 11 | 5  | 8  | 4  | 6  | 3  | 7  |
| C04223 | 2  | 11 | 8  | 5  | 3  | 10 | 9  | 1  | 7  | 6  | 4  |
| C05146 | 4  | 11 | 5  | 8  | 6  | 3  | 10 | 2  | 1  | 7  | 9  |
| C15635 | 11 | 1  | 9  | 8  | 5  | 3  | 4  | 2  | 6  | 7  | 10 |
| C11075 | 11 | 10 | 2  | 9  | 5  | 7  | 6  | 3  | 4  | 1  | 8  |
| C08109 | 9  | 6  | 10 | 5  | 4  | 2  | 11 | 1  | 8  | 3  | 7  |
| C03189 | 1  | 2  | 3  | 8  | 5  | 6  | 9  | 10 | 4  | 11 | 7  |
| C08944 | 6  | 10 | 2  | 5  | 8  | 4  | 3  | 1  | 11 | 7  | 9  |
| C04104 | 5  | 2  | 6  | 8  | 1  | 10 | 11 | 4  | 9  | 7  | 3  |

|        |    |    |    |    |    |    |    |    |    |    |    |
|--------|----|----|----|----|----|----|----|----|----|----|----|
| C12285 | 1  | 10 | 5  | 8  | 11 | 2  | 7  | 3  | 9  | 4  | 6  |
| C13680 | 9  | 10 | 8  | 5  | 6  | 2  | 7  | 11 | 4  | 3  | 1  |
| C09676 | 9  | 5  | 10 | 6  | 2  | 11 | 4  | 1  | 7  | 3  | 8  |
| C14387 | 11 | 9  | 10 | 2  | 7  | 1  | 8  | 3  | 5  | 4  | 6  |
| C10191 | 10 | 5  | 8  | 7  | 4  | 3  | 6  | 2  | 11 | 9  | 1  |
| C05888 | 1  | 7  | 4  | 10 | 9  | 2  | 8  | 5  | 11 | 3  | 6  |
| C14394 | 11 | 2  | 8  | 5  | 6  | 4  | 10 | 3  | 9  | 7  | 1  |
| C13673 | 2  | 7  | 1  | 6  | 9  | 3  | 10 | 5  | 11 | 4  | 8  |
| C08192 | 4  | 5  | 11 | 10 | 8  | 1  | 3  | 2  | 6  | 9  | 7  |
| C06686 | 10 | 9  | 8  | 3  | 11 | 1  | 6  | 5  | 4  | 2  | 7  |
| C02427 | 5  | 2  | 6  | 4  | 10 | 8  | 7  | 11 | 1  | 3  | 9  |
| C00895 | 4  | 9  | 6  | 7  | 11 | 5  | 1  | 10 | 2  | 3  | 8  |
| C09181 | 9  | 10 | 1  | 11 | 4  | 3  | 5  | 2  | 7  | 6  | 8  |
| C09308 | 10 | 1  | 2  | 8  | 6  | 5  | 7  | 3  | 9  | 4  | 11 |
| C13024 | 9  | 6  | 2  | 8  | 3  | 7  | 1  | 4  | 10 | 11 | 5  |
| C14694 | 5  | 11 | 6  | 2  | 10 | 3  | 8  | 9  | 7  | 4  | 1  |
| C02293 | 2  | 8  | 1  | 11 | 4  | 6  | 5  | 10 | 9  | 3  | 7  |
| C14733 | 1  | 2  | 8  | 5  | 11 | 4  | 6  | 9  | 3  | 10 | 7  |
| C07323 | 3  | 5  | 9  | 10 | 11 | 7  | 2  | 1  | 8  | 4  | 6  |
| C13675 | 6  | 8  | 5  | 2  | 1  | 11 | 10 | 3  | 7  | 9  | 4  |
| C14289 | 11 | 6  | 2  | 5  | 4  | 1  | 10 | 3  | 8  | 9  | 7  |
| C00939 | 4  | 8  | 9  | 10 | 1  | 5  | 11 | 6  | 2  | 3  | 7  |
| C15619 | 8  | 11 | 5  | 9  | 10 | 4  | 6  | 3  | 2  | 7  | 1  |
| C09101 | 3  | 1  | 10 | 7  | 11 | 4  | 5  | 6  | 2  | 8  | 9  |
| C07499 | 11 | 10 | 7  | 9  | 6  | 8  | 3  | 2  | 4  | 1  | 5  |
| C13547 | 3  | 4  | 8  | 1  | 2  | 9  | 11 | 5  | 7  | 6  | 10 |
| C02283 | 3  | 2  | 10 | 5  | 8  | 1  | 6  | 4  | 9  | 11 | 7  |
| C09028 | 10 | 1  | 5  | 4  | 8  | 6  | 9  | 11 | 2  | 7  | 3  |
| C12277 | 2  | 1  | 6  | 8  | 4  | 11 | 5  | 9  | 10 | 7  | 3  |
| C07792 | 3  | 5  | 10 | 4  | 9  | 11 | 2  | 8  | 7  | 1  | 6  |
| C11118 | 1  | 8  | 11 | 9  | 3  | 10 | 2  | 4  | 5  | 6  | 7  |
| C12072 | 10 | 11 | 3  | 5  | 6  | 9  | 2  | 1  | 4  | 8  | 7  |
| C10079 | 10 | 3  | 8  | 5  | 11 | 2  | 9  | 7  | 1  | 6  | 4  |
| C06045 | 5  | 10 | 11 | 8  | 6  | 1  | 2  | 3  | 9  | 4  | 7  |
| C08307 | 5  | 8  | 10 | 11 | 7  | 1  | 3  | 6  | 9  | 2  | 4  |
| C06850 | 10 | 5  | 4  | 3  | 2  | 8  | 9  | 11 | 1  | 6  | 7  |
| C07453 | 5  | 10 | 3  | 11 | 1  | 4  | 9  | 2  | 8  | 7  | 6  |
| C03795 | 4  | 9  | 2  | 10 | 11 | 5  | 6  | 7  | 3  | 1  | 8  |
| C14709 | 11 | 8  | 2  | 10 | 1  | 4  | 3  | 7  | 5  | 6  | 9  |
| C14218 | 11 | 4  | 6  | 3  | 5  | 7  | 8  | 10 | 1  | 9  | 2  |
| C06742 | 2  | 8  | 5  | 6  | 9  | 1  | 7  | 11 | 10 | 3  | 4  |
| C12444 | 9  | 8  | 4  | 5  | 11 | 3  | 2  | 10 | 6  | 7  | 1  |
| C09720 | 9  | 10 | 8  | 4  | 5  | 1  | 3  | 2  | 11 | 6  | 7  |

|        |    |    |    |    |    |    |    |    |    |    |    |
|--------|----|----|----|----|----|----|----|----|----|----|----|
| C09748 | 10 | 6  | 5  | 9  | 2  | 8  | 7  | 4  | 1  | 3  | 11 |
| C04227 | 5  | 10 | 6  | 3  | 1  | 8  | 2  | 7  | 4  | 9  | 11 |
| C07798 | 10 | 5  | 3  | 2  | 11 | 4  | 9  | 7  | 8  | 1  | 6  |
| C10099 | 10 | 2  | 4  | 7  | 9  | 5  | 8  | 3  | 11 | 6  | 1  |
| C12567 | 1  | 2  | 11 | 8  | 9  | 7  | 4  | 5  | 6  | 10 | 3  |
| C07524 | 10 | 11 | 5  | 3  | 1  | 2  | 6  | 9  | 4  | 8  | 7  |
| C15615 | 10 | 4  | 6  | 11 | 5  | 8  | 3  | 9  | 1  | 2  | 7  |
| C08700 | 9  | 10 | 8  | 11 | 1  | 2  | 3  | 7  | 6  | 5  | 4  |
| C02911 | 1  | 5  | 2  | 8  | 6  | 11 | 3  | 9  | 10 | 4  | 7  |
| C12101 | 11 | 5  | 6  | 9  | 8  | 7  | 2  | 1  | 10 | 3  | 4  |
| C04447 | 2  | 4  | 8  | 6  | 5  | 10 | 3  | 1  | 7  | 11 | 9  |
| C04521 | 1  | 11 | 2  | 8  | 5  | 6  | 7  | 3  | 4  | 10 | 9  |
| C01837 | 2  | 8  | 1  | 11 | 6  | 3  | 5  | 10 | 4  | 9  | 7  |
| C03958 | 5  | 11 | 10 | 1  | 2  | 3  | 6  | 4  | 8  | 9  | 7  |
| C10821 | 9  | 11 | 1  | 4  | 10 | 3  | 5  | 8  | 7  | 2  | 6  |
| C11239 | 10 | 3  | 5  | 8  | 2  | 6  | 11 | 1  | 9  | 4  | 7  |
| C04711 | 2  | 6  | 7  | 1  | 8  | 9  | 4  | 3  | 10 | 11 | 5  |
| C03982 | 5  | 10 | 9  | 1  | 8  | 2  | 11 | 4  | 6  | 3  | 7  |
| C09642 | 5  | 10 | 1  | 11 | 6  | 3  | 9  | 8  | 2  | 4  | 7  |
| C03571 | 5  | 6  | 10 | 8  | 2  | 7  | 11 | 1  | 3  | 4  | 9  |
| C05418 | 3  | 9  | 11 | 8  | 5  | 7  | 6  | 10 | 2  | 1  | 4  |
| C11342 | 10 | 9  | 1  | 11 | 4  | 5  | 3  | 2  | 8  | 6  | 7  |
| C09602 | 3  | 1  | 10 | 2  | 5  | 7  | 11 | 9  | 8  | 6  | 4  |
| C08340 | 5  | 10 | 11 | 8  | 3  | 1  | 2  | 7  | 4  | 9  | 6  |
| C12292 | 9  | 1  | 5  | 3  | 11 | 6  | 7  | 2  | 10 | 8  | 4  |
| C04552 | 5  | 9  | 7  | 10 | 2  | 8  | 6  | 3  | 11 | 4  | 1  |
| C07574 | 11 | 5  | 10 | 9  | 4  | 2  | 6  | 8  | 3  | 1  | 7  |
| C11177 | 3  | 4  | 2  | 1  | 5  | 11 | 9  | 10 | 8  | 7  | 6  |
| C12227 | 10 | 5  | 3  | 2  | 1  | 6  | 4  | 8  | 11 | 9  | 7  |
| C00832 | 10 | 9  | 5  | 6  | 11 | 2  | 1  | 3  | 4  | 8  | 7  |
| C13753 | 4  | 3  | 2  | 8  | 7  | 11 | 10 | 9  | 5  | 6  | 1  |
| C14222 | 11 | 3  | 1  | 10 | 5  | 9  | 4  | 7  | 8  | 6  | 2  |
| C12164 | 10 | 3  | 4  | 5  | 1  | 2  | 7  | 11 | 9  | 6  | 8  |
| C15213 | 3  | 11 | 7  | 2  | 6  | 8  | 10 | 1  | 5  | 9  | 4  |
| C15478 | 1  | 10 | 7  | 3  | 8  | 5  | 4  | 9  | 11 | 2  | 6  |
| C12115 | 5  | 11 | 8  | 1  | 2  | 3  | 6  | 9  | 10 | 4  | 7  |
| C14566 | 11 | 6  | 4  | 5  | 2  | 1  | 9  | 7  | 10 | 3  | 8  |
| C04445 | 5  | 2  | 10 | 1  | 11 | 8  | 7  | 9  | 4  | 3  | 6  |
| C14690 | 2  | 5  | 3  | 6  | 1  | 11 | 4  | 8  | 10 | 9  | 7  |
| C04537 | 1  | 4  | 7  | 10 | 9  | 6  | 11 | 3  | 8  | 5  | 2  |
| C13693 | 11 | 5  | 1  | 4  | 3  | 6  | 10 | 9  | 8  | 2  | 7  |
| C14520 | 11 | 2  | 1  | 3  | 10 | 6  | 8  | 9  | 5  | 4  | 7  |
| C16487 | 1  | 2  | 11 | 6  | 8  | 5  | 3  | 4  | 10 | 7  | 9  |

|        |    |    |    |    |    |    |    |    |    |    |    |
|--------|----|----|----|----|----|----|----|----|----|----|----|
| C10514 | 10 | 5  | 9  | 3  | 2  | 4  | 6  | 1  | 7  | 11 | 8  |
| C10364 | 10 | 9  | 6  | 5  | 2  | 11 | 7  | 1  | 3  | 8  | 4  |
| C10872 | 10 | 11 | 5  | 1  | 3  | 8  | 2  | 6  | 7  | 9  | 4  |
| C10679 | 11 | 3  | 6  | 8  | 9  | 10 | 1  | 2  | 4  | 7  | 5  |
| C15720 | 10 | 5  | 1  | 6  | 9  | 7  | 8  | 4  | 3  | 11 | 2  |
| C10748 | 10 | 3  | 1  | 11 | 2  | 7  | 5  | 9  | 6  | 4  | 8  |
| C00525 | 5  | 6  | 2  | 8  | 10 | 1  | 9  | 11 | 4  | 3  | 7  |
| C08642 | 10 | 5  | 2  | 7  | 3  | 8  | 6  | 9  | 4  | 1  | 11 |
| C11301 | 3  | 4  | 2  | 7  | 8  | 11 | 5  | 6  | 9  | 10 | 1  |
| C07640 | 11 | 10 | 9  | 8  | 4  | 5  | 6  | 7  | 2  | 1  | 3  |
| C14667 | 3  | 10 | 4  | 2  | 9  | 6  | 11 | 5  | 1  | 8  | 7  |
| C12051 | 4  | 8  | 1  | 5  | 3  | 9  | 2  | 7  | 6  | 10 | 11 |
| C02703 | 5  | 2  | 6  | 8  | 4  | 1  | 3  | 11 | 10 | 9  | 7  |
| C11179 | 11 | 10 | 5  | 6  | 2  | 4  | 8  | 1  | 3  | 9  | 7  |
| C15676 | 1  | 9  | 2  | 6  | 5  | 7  | 4  | 3  | 8  | 11 | 10 |
| C14605 | 8  | 11 | 3  | 1  | 6  | 2  | 4  | 9  | 10 | 7  | 5  |
| C09768 | 1  | 9  | 10 | 2  | 8  | 3  | 6  | 5  | 11 | 4  | 7  |
| C05204 | 10 | 9  | 11 | 7  | 3  | 1  | 5  | 8  | 6  | 2  | 4  |
| C07423 | 10 | 1  | 5  | 6  | 11 | 3  | 4  | 2  | 8  | 9  | 7  |
| C06823 | 10 | 5  | 9  | 3  | 1  | 4  | 2  | 8  | 11 | 6  | 7  |
| C04586 | 2  | 6  | 8  | 10 | 1  | 5  | 7  | 3  | 9  | 11 | 4  |
| C06895 | 10 | 9  | 6  | 5  | 7  | 2  | 1  | 11 | 3  | 4  | 8  |
| C04755 | 1  | 8  | 2  | 7  | 5  | 10 | 4  | 9  | 3  | 11 | 6  |
| C02895 | 1  | 2  | 4  | 8  | 5  | 9  | 3  | 7  | 6  | 10 | 11 |
| C15548 | 1  | 10 | 3  | 6  | 11 | 2  | 9  | 4  | 5  | 8  | 7  |
| C07598 | 1  | 5  | 8  | 2  | 6  | 11 | 3  | 9  | 7  | 4  | 10 |
| C07573 | 8  | 2  | 1  | 9  | 3  | 11 | 6  | 10 | 7  | 4  | 5  |
| C14503 | 3  | 9  | 11 | 5  | 7  | 2  | 1  | 4  | 10 | 8  | 6  |
| C05111 | 3  | 6  | 2  | 8  | 9  | 10 | 4  | 7  | 11 | 1  | 5  |
| C14593 | 3  | 11 | 5  | 4  | 8  | 6  | 7  | 1  | 9  | 2  | 10 |
| C09540 | 1  | 10 | 3  | 4  | 7  | 6  | 9  | 8  | 11 | 5  | 2  |
| C03251 | 1  | 2  | 9  | 4  | 10 | 3  | 8  | 6  | 5  | 7  | 11 |
| C01662 | 1  | 2  | 10 | 9  | 4  | 5  | 8  | 11 | 6  | 3  | 7  |
| C08129 | 1  | 3  | 2  | 5  | 11 | 8  | 6  | 4  | 9  | 10 | 7  |
| C04416 | 8  | 3  | 2  | 4  | 5  | 9  | 11 | 7  | 1  | 10 | 6  |
| C08605 | 8  | 9  | 4  | 1  | 10 | 6  | 3  | 5  | 11 | 2  | 7  |
| C07443 | 11 | 5  | 10 | 1  | 3  | 8  | 9  | 2  | 6  | 4  | 7  |
| C05371 | 2  | 10 | 11 | 8  | 5  | 7  | 1  | 3  | 6  | 9  | 4  |
| C09732 | 10 | 9  | 5  | 1  | 8  | 2  | 7  | 4  | 3  | 11 | 6  |
| C02924 | 6  | 1  | 5  | 2  | 8  | 11 | 9  | 7  | 4  | 3  | 10 |
| C08588 | 8  | 9  | 10 | 1  | 5  | 4  | 11 | 6  | 3  | 2  | 7  |
| C06690 | 3  | 10 | 8  | 5  | 11 | 9  | 7  | 6  | 1  | 4  | 2  |
| C11052 | 11 | 3  | 8  | 10 | 1  | 2  | 6  | 9  | 4  | 5  | 7  |

|        |    |    |    |    |    |    |    |    |    |    |    |
|--------|----|----|----|----|----|----|----|----|----|----|----|
| C01930 | 5  | 6  | 8  | 10 | 11 | 2  | 1  | 3  | 4  | 9  | 7  |
| C10736 | 5  | 10 | 9  | 8  | 4  | 3  | 2  | 11 | 6  | 1  | 7  |
| C14186 | 11 | 2  | 4  | 1  | 5  | 8  | 3  | 9  | 6  | 7  | 10 |
| C11839 | 5  | 2  | 1  | 10 | 8  | 11 | 4  | 3  | 7  | 9  | 6  |
| C08002 | 10 | 6  | 9  | 4  | 11 | 2  | 1  | 7  | 3  | 8  | 5  |
| C10972 | 11 | 5  | 6  | 4  | 2  | 8  | 10 | 3  | 9  | 7  | 1  |
| C09750 | 9  | 3  | 2  | 10 | 8  | 1  | 5  | 11 | 7  | 6  | 4  |
| C15516 | 2  | 3  | 8  | 6  | 9  | 5  | 11 | 10 | 4  | 7  | 1  |
| C01796 | 1  | 2  | 8  | 5  | 3  | 10 | 6  | 7  | 9  | 11 | 4  |
| C07904 | 5  | 9  | 8  | 1  | 10 | 4  | 3  | 11 | 2  | 7  | 6  |
| C06897 | 10 | 9  | 5  | 6  | 4  | 2  | 8  | 3  | 7  | 11 | 1  |
| C02454 | 11 | 5  | 1  | 6  | 8  | 9  | 3  | 7  | 2  | 10 | 4  |
| C09265 | 10 | 11 | 5  | 6  | 3  | 7  | 9  | 2  | 1  | 4  | 8  |
| C06489 | 10 | 11 | 3  | 5  | 2  | 6  | 9  | 1  | 8  | 7  | 4  |
| C08424 | 10 | 5  | 11 | 7  | 3  | 1  | 4  | 9  | 8  | 6  | 2  |
| C09205 | 9  | 3  | 5  | 6  | 2  | 8  | 4  | 10 | 1  | 11 | 7  |
| C14708 | 11 | 4  | 5  | 6  | 1  | 10 | 3  | 8  | 7  | 2  | 9  |
| C10798 | 11 | 5  | 4  | 2  | 8  | 6  | 9  | 3  | 7  | 1  | 10 |
| C12712 | 11 | 10 | 1  | 2  | 3  | 6  | 5  | 4  | 7  | 8  | 9  |
| C04017 | 1  | 6  | 5  | 3  | 11 | 2  | 9  | 10 | 7  | 8  | 4  |
| C12102 | 11 | 5  | 1  | 10 | 9  | 4  | 8  | 2  | 6  | 3  | 7  |
| C03733 | 1  | 4  | 9  | 3  | 8  | 6  | 10 | 5  | 7  | 11 | 2  |
| C09793 | 10 | 5  | 1  | 9  | 6  | 11 | 8  | 2  | 7  | 4  | 3  |
| C00349 | 6  | 8  | 2  | 5  | 1  | 11 | 9  | 3  | 4  | 10 | 7  |
| C11840 | 8  | 5  | 2  | 11 | 9  | 1  | 6  | 3  | 10 | 7  | 4  |
| C09149 | 10 | 3  | 1  | 5  | 4  | 8  | 2  | 11 | 7  | 6  | 9  |
| C11738 | 5  | 11 | 10 | 3  | 8  | 1  | 2  | 4  | 6  | 9  | 7  |
| C11806 | 10 | 1  | 9  | 4  | 5  | 2  | 11 | 7  | 8  | 3  | 6  |
| C09204 | 11 | 4  | 3  | 9  | 8  | 1  | 10 | 2  | 6  | 5  | 7  |
| C07578 | 11 | 10 | 4  | 2  | 1  | 6  | 5  | 8  | 3  | 7  | 9  |
| C00238 | 1  | 5  | 2  | 6  | 8  | 4  | 10 | 3  | 11 | 9  | 7  |
| C11159 | 1  | 2  | 11 | 8  | 5  | 6  | 10 | 9  | 4  | 3  | 7  |
| C07116 | 5  | 10 | 8  | 4  | 6  | 11 | 9  | 7  | 2  | 3  | 1  |
| C01552 | 2  | 10 | 5  | 3  | 11 | 4  | 8  | 1  | 6  | 7  | 9  |
| C15570 | 10 | 11 | 5  | 6  | 4  | 8  | 3  | 9  | 1  | 2  | 7  |
| C09976 | 1  | 3  | 9  | 10 | 8  | 11 | 7  | 5  | 4  | 6  | 2  |
| C08051 | 11 | 5  | 9  | 1  | 8  | 4  | 7  | 6  | 10 | 3  | 2  |
| C10970 | 5  | 9  | 10 | 8  | 4  | 2  | 11 | 1  | 3  | 7  | 6  |
| C10070 | 9  | 3  | 8  | 1  | 10 | 4  | 11 | 7  | 6  | 2  | 5  |
| C15435 | 1  | 9  | 10 | 2  | 7  | 5  | 4  | 6  | 8  | 11 | 3  |
| C11589 | 3  | 6  | 7  | 10 | 1  | 11 | 5  | 9  | 2  | 4  | 8  |
| C11266 | 4  | 3  | 9  | 10 | 2  | 5  | 6  | 11 | 8  | 1  | 7  |
| C10519 | 10 | 7  | 8  | 1  | 6  | 3  | 11 | 5  | 2  | 4  | 9  |



|        |    |    |    |    |    |    |    |    |    |    |    |
|--------|----|----|----|----|----|----|----|----|----|----|----|
| C08099 | 10 | 9  | 6  | 5  | 4  | 8  | 11 | 7  | 1  | 3  | 2  |
| C08313 | 5  | 2  | 8  | 11 | 6  | 10 | 1  | 3  | 9  | 7  | 4  |
| C14207 | 3  | 1  | 10 | 6  | 11 | 8  | 5  | 7  | 9  | 2  | 4  |
| C10293 | 11 | 3  | 7  | 1  | 10 | 2  | 8  | 9  | 5  | 4  | 6  |
| C11048 | 5  | 10 | 2  | 8  | 3  | 11 | 9  | 4  | 1  | 6  | 7  |
| C09913 | 9  | 11 | 3  | 10 | 5  | 6  | 8  | 1  | 2  | 4  | 7  |
| C09950 | 11 | 2  | 8  | 6  | 9  | 10 | 7  | 3  | 4  | 1  | 5  |
| C01925 | 10 | 1  | 9  | 7  | 11 | 3  | 8  | 2  | 6  | 5  | 4  |
| C08302 | 5  | 10 | 1  | 7  | 11 | 3  | 8  | 4  | 2  | 9  | 6  |
| C12288 | 9  | 10 | 11 | 3  | 1  | 6  | 7  | 4  | 8  | 2  | 5  |
| C15485 | 1  | 5  | 2  | 8  | 6  | 11 | 4  | 7  | 10 | 3  | 9  |
| C12168 | 10 | 5  | 1  | 2  | 6  | 11 | 9  | 3  | 4  | 7  | 8  |
| C04420 | 1  | 10 | 6  | 7  | 9  | 2  | 8  | 3  | 11 | 4  | 5  |
| C06939 | 10 | 1  | 5  | 6  | 2  | 4  | 8  | 11 | 9  | 7  | 3  |
| C11160 | 11 | 10 | 2  | 8  | 5  | 4  | 6  | 1  | 9  | 3  | 7  |
| C15469 | 11 | 8  | 10 | 5  | 1  | 9  | 3  | 2  | 6  | 4  | 7  |
| C08697 | 9  | 10 | 11 | 5  | 4  | 1  | 7  | 3  | 6  | 8  | 2  |
| C15589 | 10 | 11 | 5  | 3  | 2  | 1  | 9  | 6  | 8  | 7  | 4  |
| C00824 | 8  | 2  | 5  | 1  | 6  | 11 | 9  | 4  | 10 | 3  | 7  |
| C06123 | 3  | 6  | 2  | 8  | 7  | 1  | 9  | 5  | 11 | 4  | 10 |
| C09911 | 9  | 3  | 7  | 2  | 5  | 6  | 11 | 10 | 4  | 8  | 1  |
| C07014 | 9  | 3  | 5  | 1  | 8  | 11 | 10 | 2  | 4  | 7  | 6  |
| C03228 | 11 | 6  | 8  | 5  | 7  | 3  | 1  | 4  | 2  | 9  | 10 |
| C10682 | 10 | 2  | 8  | 3  | 11 | 5  | 6  | 4  | 1  | 9  | 7  |
| C14633 | 11 | 6  | 8  | 5  | 7  | 10 | 3  | 2  | 1  | 4  | 9  |
| C05353 | 1  | 2  | 4  | 5  | 11 | 10 | 8  | 6  | 3  | 7  | 9  |
| C13037 | 3  | 9  | 6  | 2  | 1  | 7  | 8  | 5  | 4  | 11 | 10 |
| C06414 | 8  | 2  | 4  | 11 | 7  | 1  | 3  | 9  | 10 | 5  | 6  |
| C12491 | 5  | 10 | 6  | 2  | 8  | 11 | 9  | 1  | 3  | 7  | 4  |
| C11126 | 9  | 11 | 2  | 10 | 8  | 4  | 5  | 6  | 3  | 7  | 1  |
| C06888 | 9  | 10 | 8  | 2  | 3  | 7  | 6  | 11 | 5  | 4  | 1  |
| C06889 | 9  | 10 | 5  | 6  | 11 | 7  | 2  | 4  | 1  | 8  | 3  |
| C01421 | 1  | 4  | 9  | 3  | 10 | 7  | 6  | 2  | 8  | 11 | 5  |
| C08918 | 3  | 9  | 10 | 6  | 1  | 2  | 8  | 4  | 7  | 5  | 11 |
| C07312 | 4  | 11 | 9  | 1  | 6  | 5  | 2  | 3  | 7  | 8  | 10 |
| C07187 | 5  | 11 | 10 | 4  | 9  | 2  | 3  | 7  | 1  | 8  | 6  |
| C04054 | 2  | 8  | 10 | 3  | 7  | 9  | 4  | 6  | 1  | 11 | 5  |
| C07899 | 5  | 1  | 10 | 7  | 2  | 9  | 6  | 11 | 3  | 4  | 8  |
| C11790 | 10 | 11 | 5  | 6  | 1  | 3  | 7  | 4  | 8  | 9  | 2  |
| C13833 | 3  | 5  | 2  | 4  | 7  | 8  | 1  | 11 | 10 | 9  | 6  |
| C02200 | 1  | 10 | 9  | 7  | 4  | 3  | 8  | 2  | 11 | 5  | 6  |
| C08324 | 10 | 3  | 8  | 5  | 1  | 4  | 11 | 6  | 9  | 7  | 2  |
| C14764 | 5  | 10 | 9  | 6  | 11 | 7  | 4  | 8  | 3  | 1  | 2  |

|        |    |    |    |    |    |    |    |    |    |    |    |
|--------|----|----|----|----|----|----|----|----|----|----|----|
| C14594 | 3  | 1  | 2  | 9  | 5  | 11 | 4  | 10 | 6  | 8  | 7  |
| C14011 | 1  | 6  | 5  | 7  | 4  | 8  | 9  | 10 | 11 | 3  | 2  |
| C09482 | 4  | 10 | 1  | 9  | 7  | 11 | 8  | 5  | 3  | 6  | 2  |
| C09798 | 9  | 10 | 3  | 5  | 8  | 6  | 4  | 2  | 7  | 11 | 1  |
| C10826 | 3  | 9  | 10 | 5  | 7  | 2  | 6  | 11 | 8  | 1  | 4  |
| C10029 | 10 | 11 | 7  | 2  | 6  | 4  | 3  | 1  | 9  | 8  | 5  |
| C07417 | 4  | 6  | 2  | 5  | 10 | 9  | 3  | 1  | 11 | 7  | 8  |
| C03030 | 4  | 6  | 8  | 10 | 1  | 5  | 2  | 11 | 7  | 3  | 9  |
| C09554 | 3  | 2  | 1  | 10 | 9  | 6  | 8  | 11 | 5  | 4  | 7  |
| C00182 | 1  | 2  | 5  | 3  | 9  | 6  | 4  | 8  | 11 | 10 | 7  |
| C00659 | 5  | 1  | 8  | 6  | 2  | 11 | 9  | 3  | 10 | 4  | 7  |
| C02564 | 2  | 8  | 6  | 4  | 3  | 5  | 10 | 7  | 9  | 1  | 11 |
| C14328 | 11 | 2  | 3  | 8  | 10 | 7  | 1  | 9  | 6  | 5  | 4  |
| C02522 | 1  | 2  | 5  | 10 | 3  | 6  | 8  | 9  | 4  | 11 | 7  |
| C12717 | 10 | 4  | 8  | 9  | 5  | 7  | 3  | 11 | 1  | 2  | 6  |
| C03098 | 10 | 9  | 11 | 5  | 6  | 7  | 3  | 8  | 4  | 1  | 2  |
| C11263 | 9  | 1  | 3  | 5  | 11 | 4  | 8  | 10 | 6  | 7  | 2  |
| C05364 | 11 | 8  | 2  | 6  | 7  | 10 | 3  | 1  | 5  | 9  | 4  |
| C06810 | 4  | 6  | 11 | 9  | 5  | 2  | 1  | 10 | 8  | 3  | 7  |
| C08615 | 3  | 10 | 9  | 11 | 1  | 5  | 2  | 4  | 8  | 7  | 6  |
| C10258 | 9  | 8  | 3  | 6  | 4  | 10 | 1  | 5  | 11 | 7  | 2  |
| C14438 | 11 | 1  | 3  | 10 | 2  | 4  | 8  | 9  | 5  | 7  | 6  |
| C01924 | 5  | 6  | 10 | 2  | 8  | 11 | 1  | 7  | 4  | 9  | 3  |
| C02572 | 5  | 8  | 10 | 3  | 1  | 6  | 11 | 2  | 7  | 4  | 9  |
| C13700 | 3  | 11 | 5  | 8  | 1  | 10 | 9  | 6  | 7  | 2  | 4  |
| C09123 | 10 | 7  | 5  | 1  | 9  | 2  | 6  | 3  | 11 | 8  | 4  |
| C06980 | 5  | 10 | 1  | 11 | 2  | 4  | 9  | 3  | 8  | 6  | 7  |
| C02080 | 2  | 5  | 11 | 4  | 6  | 1  | 7  | 10 | 9  | 3  | 8  |
| C11152 | 2  | 5  | 1  | 11 | 6  | 3  | 10 | 4  | 8  | 9  | 7  |
| C16444 | 11 | 6  | 1  | 8  | 5  | 3  | 9  | 4  | 2  | 7  | 10 |
| C14333 | 9  | 11 | 1  | 8  | 2  | 5  | 7  | 3  | 6  | 4  | 10 |
| C02356 | 5  | 8  | 2  | 6  | 1  | 10 | 11 | 9  | 4  | 7  | 3  |
| C06921 | 11 | 5  | 3  | 10 | 6  | 4  | 1  | 9  | 7  | 8  | 2  |
| C01023 | 10 | 9  | 11 | 6  | 5  | 3  | 7  | 1  | 4  | 8  | 2  |
| C03848 | 1  | 4  | 9  | 3  | 10 | 2  | 5  | 8  | 6  | 11 | 7  |
| C04733 | 1  | 11 | 2  | 6  | 8  | 10 | 4  | 3  | 9  | 7  | 5  |
| C10894 | 5  | 2  | 11 | 7  | 9  | 3  | 10 | 6  | 4  | 8  | 1  |
| C01688 | 10 | 1  | 9  | 7  | 11 | 3  | 8  | 2  | 5  | 6  | 4  |
| C11212 | 10 | 6  | 1  | 5  | 7  | 2  | 3  | 4  | 11 | 8  | 9  |
| C11380 | 8  | 5  | 10 | 2  | 11 | 6  | 3  | 1  | 9  | 4  | 7  |
| C09375 | 5  | 10 | 2  | 7  | 4  | 8  | 11 | 3  | 1  | 9  | 6  |
| C09195 | 5  | 10 | 11 | 9  | 4  | 7  | 3  | 6  | 2  | 1  | 8  |
| C01905 | 5  | 6  | 2  | 1  | 10 | 8  | 4  | 9  | 11 | 7  | 3  |

|        |    |    |    |    |    |    |    |    |    |    |    |
|--------|----|----|----|----|----|----|----|----|----|----|----|
| C07637 | 10 | 4  | 1  | 2  | 6  | 11 | 5  | 3  | 7  | 8  | 9  |
| C04322 | 5  | 6  | 8  | 2  | 1  | 10 | 4  | 3  | 11 | 9  | 7  |
| C10874 | 10 | 9  | 8  | 2  | 6  | 11 | 3  | 1  | 5  | 4  | 7  |
| C06222 | 2  | 1  | 7  | 8  | 3  | 10 | 5  | 9  | 11 | 4  | 6  |
| C08613 | 9  | 1  | 8  | 2  | 5  | 4  | 10 | 11 | 3  | 7  | 6  |
| C11710 | 10 | 5  | 11 | 3  | 1  | 2  | 6  | 7  | 8  | 9  | 4  |
| C07350 | 2  | 6  | 5  | 9  | 3  | 1  | 4  | 11 | 8  | 7  | 10 |
| C13840 | 3  | 2  | 9  | 4  | 7  | 11 | 5  | 10 | 6  | 8  | 1  |
| C09435 | 9  | 10 | 4  | 2  | 8  | 1  | 7  | 3  | 5  | 11 | 6  |
| C04333 | 8  | 2  | 5  | 7  | 10 | 3  | 6  | 11 | 1  | 9  | 4  |
| C10367 | 11 | 9  | 8  | 6  | 10 | 5  | 4  | 3  | 2  | 7  | 1  |
| C14752 | 3  | 10 | 11 | 9  | 2  | 8  | 6  | 7  | 5  | 1  | 4  |
| C07450 | 5  | 10 | 11 | 2  | 1  | 4  | 6  | 3  | 8  | 7  | 9  |
| C11623 | 3  | 1  | 11 | 4  | 10 | 2  | 7  | 8  | 5  | 6  | 9  |
| C11185 | 3  | 1  | 6  | 8  | 9  | 10 | 5  | 4  | 2  | 11 | 7  |
| C06970 | 5  | 9  | 3  | 10 | 2  | 6  | 1  | 11 | 4  | 7  | 8  |
| C09973 | 11 | 5  | 10 | 1  | 9  | 2  | 7  | 3  | 8  | 6  | 4  |
| C07196 | 5  | 10 | 4  | 8  | 11 | 3  | 1  | 9  | 6  | 2  | 7  |
| C02453 | 2  | 7  | 4  | 3  | 8  | 11 | 5  | 6  | 1  | 9  | 10 |
| C11175 | 6  | 3  | 5  | 2  | 9  | 10 | 4  | 7  | 1  | 8  | 11 |
| C06902 | 1  | 11 | 5  | 10 | 2  | 8  | 4  | 9  | 6  | 3  | 7  |
| C02193 | 2  | 4  | 8  | 1  | 10 | 5  | 3  | 9  | 7  | 11 | 6  |
| C07560 | 11 | 10 | 5  | 4  | 7  | 1  | 2  | 3  | 8  | 9  | 6  |
| C08756 | 10 | 7  | 11 | 2  | 3  | 4  | 5  | 8  | 6  | 1  | 9  |
| C00835 | 8  | 5  | 2  | 6  | 10 | 4  | 1  | 7  | 11 | 9  | 3  |
| C15495 | 2  | 5  | 4  | 8  | 11 | 6  | 10 | 1  | 7  | 9  | 3  |
| C09761 | 10 | 6  | 1  | 5  | 8  | 11 | 9  | 4  | 7  | 3  | 2  |
| C09547 | 10 | 11 | 3  | 2  | 9  | 6  | 8  | 4  | 5  | 1  | 7  |
| C11100 | 3  | 9  | 4  | 10 | 7  | 2  | 5  | 11 | 6  | 8  | 1  |
| C09910 | 1  | 9  | 6  | 4  | 11 | 2  | 3  | 10 | 5  | 7  | 8  |
| C06534 | 10 | 11 | 8  | 5  | 1  | 9  | 3  | 7  | 4  | 2  | 6  |
| C08676 | 10 | 9  | 7  | 1  | 6  | 8  | 11 | 3  | 4  | 2  | 5  |
| C09674 | 8  | 7  | 2  | 3  | 6  | 10 | 11 | 9  | 5  | 4  | 1  |
| C12155 | 3  | 10 | 8  | 9  | 2  | 7  | 5  | 11 | 6  | 4  | 1  |
| C10446 | 10 | 5  | 3  | 8  | 9  | 11 | 2  | 1  | 6  | 4  | 7  |
| C12189 | 1  | 10 | 11 | 5  | 7  | 2  | 9  | 6  | 4  | 3  | 8  |
| C09230 | 5  | 9  | 3  | 8  | 10 | 7  | 2  | 4  | 1  | 6  | 11 |
| C15628 | 3  | 9  | 10 | 1  | 5  | 7  | 8  | 6  | 2  | 11 | 4  |
| C00891 | 2  | 8  | 6  | 7  | 1  | 3  | 5  | 4  | 11 | 10 | 9  |
| C06500 | 1  | 2  | 5  | 4  | 6  | 9  | 3  | 11 | 7  | 8  | 10 |
| C04093 | 9  | 2  | 8  | 3  | 5  | 4  | 11 | 1  | 7  | 6  | 10 |
| C04316 | 11 | 3  | 5  | 1  | 2  | 6  | 9  | 8  | 4  | 7  | 10 |
| C09635 | 9  | 1  | 2  | 3  | 11 | 7  | 5  | 4  | 8  | 10 | 6  |

|        |    |    |    |    |    |    |    |    |    |    |    |
|--------|----|----|----|----|----|----|----|----|----|----|----|
| C09833 | 10 | 9  | 3  | 11 | 5  | 2  | 1  | 7  | 4  | 6  | 8  |
| C10480 | 9  | 10 | 11 | 3  | 5  | 8  | 2  | 1  | 7  | 4  | 6  |
| C01125 | 2  | 6  | 8  | 10 | 11 | 3  | 4  | 7  | 1  | 5  | 9  |
| C10836 | 10 | 11 | 5  | 8  | 9  | 6  | 4  | 3  | 7  | 2  | 1  |
| C07044 | 4  | 10 | 11 | 9  | 8  | 5  | 6  | 2  | 1  | 7  | 3  |
| C06817 | 11 | 5  | 3  | 9  | 10 | 6  | 8  | 1  | 7  | 4  | 2  |
| C06669 | 2  | 5  | 10 | 4  | 6  | 8  | 9  | 3  | 11 | 7  | 1  |
| C09171 | 11 | 3  | 9  | 2  | 6  | 4  | 1  | 7  | 10 | 8  | 5  |
| C04516 | 1  | 10 | 5  | 11 | 9  | 3  | 8  | 7  | 4  | 2  | 6  |
| C02338 | 1  | 2  | 5  | 10 | 3  | 6  | 8  | 9  | 4  | 11 | 7  |
| C11268 | 10 | 9  | 5  | 6  | 8  | 11 | 2  | 1  | 3  | 4  | 7  |
| C01711 | 1  | 8  | 2  | 10 | 6  | 3  | 11 | 5  | 4  | 7  | 9  |
| C14513 | 11 | 10 | 9  | 5  | 1  | 2  | 6  | 3  | 7  | 8  | 4  |
| C08630 | 3  | 9  | 10 | 2  | 1  | 6  | 7  | 11 | 5  | 8  | 4  |
| C15471 | 5  | 2  | 9  | 6  | 8  | 11 | 1  | 4  | 7  | 10 | 3  |
| C08219 | 5  | 2  | 6  | 10 | 11 | 1  | 4  | 8  | 9  | 3  | 7  |
| C08315 | 3  | 10 | 1  | 5  | 9  | 11 | 7  | 6  | 8  | 2  | 4  |
| C11184 | 4  | 10 | 9  | 6  | 5  | 1  | 8  | 3  | 11 | 2  | 7  |
| C14260 | 11 | 6  | 5  | 3  | 4  | 8  | 2  | 9  | 10 | 1  | 7  |
| C08431 | 4  | 11 | 9  | 2  | 5  | 10 | 3  | 8  | 1  | 6  | 7  |
| C01478 | 1  | 2  | 6  | 8  | 5  | 4  | 11 | 9  | 10 | 7  | 3  |
| C08159 | 3  | 11 | 5  | 9  | 10 | 8  | 7  | 1  | 6  | 4  | 2  |
| C00175 | 1  | 8  | 5  | 2  | 6  | 11 | 4  | 9  | 10 | 3  | 7  |
| C06804 | 1  | 11 | 5  | 10 | 3  | 2  | 8  | 6  | 9  | 4  | 7  |
| C01484 | 10 | 11 | 5  | 3  | 2  | 9  | 6  | 1  | 8  | 4  | 7  |
| C13182 | 5  | 11 | 4  | 10 | 3  | 8  | 7  | 6  | 9  | 1  | 2  |
| C11750 | 5  | 9  | 10 | 4  | 3  | 2  | 8  | 11 | 1  | 7  | 6  |
| C09521 | 9  | 11 | 7  | 4  | 2  | 6  | 1  | 3  | 8  | 5  | 10 |
| C01821 | 10 | 5  | 9  | 2  | 8  | 11 | 1  | 4  | 7  | 3  | 6  |
| C02677 | 6  | 5  | 9  | 4  | 10 | 7  | 11 | 3  | 1  | 2  | 8  |
| C04022 | 2  | 5  | 8  | 11 | 3  | 4  | 6  | 1  | 10 | 7  | 9  |
| C03930 | 3  | 2  | 10 | 5  | 8  | 1  | 6  | 4  | 9  | 11 | 7  |
| C10794 | 10 | 5  | 8  | 2  | 6  | 1  | 3  | 9  | 11 | 4  | 7  |
| C03256 | 11 | 5  | 1  | 8  | 10 | 6  | 3  | 4  | 9  | 7  | 2  |
| C13676 | 6  | 8  | 2  | 10 | 1  | 5  | 11 | 3  | 7  | 9  | 4  |
| C03495 | 4  | 2  | 9  | 8  | 10 | 5  | 1  | 7  | 11 | 3  | 6  |
| C08171 | 11 | 9  | 5  | 6  | 3  | 8  | 7  | 2  | 1  | 4  | 10 |
| C02543 | 1  | 8  | 2  | 3  | 10 | 9  | 4  | 5  | 11 | 6  | 7  |
| C14680 | 3  | 5  | 8  | 9  | 6  | 1  | 11 | 2  | 4  | 10 | 7  |
| C08146 | 10 | 9  | 5  | 11 | 6  | 1  | 4  | 8  | 2  | 3  | 7  |
| C07868 | 10 | 5  | 11 | 3  | 9  | 8  | 2  | 4  | 7  | 1  | 6  |
| C15475 | 5  | 3  | 10 | 11 | 8  | 9  | 2  | 1  | 7  | 4  | 6  |
| C13109 | 10 | 5  | 6  | 8  | 3  | 11 | 1  | 2  | 4  | 7  | 9  |

|        |    |    |    |    |    |    |    |    |    |    |    |
|--------|----|----|----|----|----|----|----|----|----|----|----|
| C12628 | 1  | 7  | 6  | 11 | 3  | 10 | 2  | 9  | 8  | 4  | 5  |
| C09339 | 10 | 8  | 1  | 11 | 9  | 7  | 2  | 4  | 3  | 6  | 5  |
| C04514 | 11 | 8  | 2  | 5  | 1  | 4  | 3  | 9  | 6  | 10 | 7  |
| C14521 | 11 | 5  | 9  | 7  | 10 | 3  | 4  | 8  | 6  | 1  | 2  |
| C10532 | 10 | 5  | 8  | 6  | 9  | 7  | 3  | 4  | 2  | 11 | 1  |
| C12232 | 10 | 4  | 1  | 7  | 9  | 8  | 11 | 3  | 6  | 2  | 5  |
| C00420 | 1  | 2  | 9  | 4  | 10 | 3  | 11 | 7  | 8  | 6  | 5  |
| C05482 | 3  | 2  | 4  | 9  | 1  | 11 | 5  | 7  | 6  | 8  | 10 |
| C10311 | 11 | 2  | 9  | 10 | 7  | 3  | 5  | 8  | 1  | 6  | 4  |
| C08525 | 10 | 3  | 1  | 8  | 2  | 7  | 6  | 11 | 9  | 4  | 5  |
| C00727 | 11 | 5  | 2  | 1  | 8  | 4  | 9  | 6  | 10 | 7  | 3  |
| C14362 | 11 | 2  | 1  | 5  | 4  | 3  | 8  | 9  | 10 | 6  | 7  |
| C07615 | 5  | 6  | 10 | 4  | 9  | 11 | 3  | 7  | 1  | 2  | 8  |
| C10995 | 11 | 5  | 10 | 9  | 4  | 2  | 1  | 7  | 6  | 3  | 8  |
| C09041 | 5  | 10 | 1  | 9  | 11 | 4  | 2  | 8  | 6  | 3  | 7  |
| C01029 | 6  | 5  | 10 | 2  | 9  | 1  | 7  | 8  | 11 | 3  | 4  |
| C02943 | 2  | 6  | 8  | 1  | 7  | 3  | 10 | 9  | 11 | 4  | 5  |
| C11320 | 5  | 1  | 6  | 2  | 10 | 8  | 4  | 11 | 9  | 3  | 7  |
| C00396 | 4  | 8  | 6  | 1  | 9  | 11 | 7  | 10 | 2  | 5  | 3  |
| C07325 | 10 | 5  | 11 | 9  | 8  | 2  | 3  | 7  | 6  | 1  | 4  |
| C09787 | 10 | 9  | 11 | 1  | 5  | 2  | 8  | 4  | 3  | 7  | 6  |
| C04611 | 9  | 4  | 5  | 7  | 2  | 1  | 10 | 3  | 6  | 11 | 8  |
| C14356 | 11 | 5  | 6  | 2  | 10 | 3  | 7  | 9  | 4  | 8  | 1  |
| C07001 | 10 | 5  | 1  | 2  | 4  | 9  | 11 | 7  | 6  | 3  | 8  |
| C02099 | 10 | 5  | 8  | 11 | 6  | 1  | 3  | 9  | 2  | 4  | 7  |
| C02207 | 8  | 2  | 1  | 6  | 4  | 9  | 11 | 5  | 7  | 3  | 10 |
| C14529 | 11 | 3  | 4  | 7  | 1  | 6  | 9  | 2  | 5  | 10 | 8  |
| C06965 | 10 | 5  | 2  | 9  | 1  | 11 | 4  | 3  | 7  | 6  | 8  |
| C07790 | 5  | 10 | 1  | 2  | 4  | 11 | 7  | 6  | 3  | 8  | 9  |
| C10788 | 10 | 11 | 5  | 8  | 9  | 3  | 6  | 1  | 2  | 4  | 7  |
| C09251 | 10 | 9  | 11 | 3  | 4  | 5  | 8  | 6  | 2  | 1  | 7  |
| C07069 | 11 | 4  | 10 | 1  | 8  | 6  | 3  | 2  | 5  | 7  | 9  |
| C01009 | 1  | 7  | 9  | 10 | 4  | 3  | 8  | 6  | 2  | 11 | 5  |
| C09156 | 5  | 10 | 2  | 6  | 4  | 8  | 11 | 3  | 7  | 1  | 9  |
| C07629 | 3  | 9  | 10 | 4  | 8  | 1  | 11 | 2  | 5  | 6  | 7  |
| C10982 | 11 | 9  | 10 | 2  | 1  | 3  | 5  | 8  | 7  | 4  | 6  |
| C15109 | 10 | 5  | 11 | 3  | 7  | 9  | 6  | 1  | 2  | 4  | 8  |
| C07666 | 11 | 10 | 8  | 9  | 2  | 5  | 6  | 7  | 1  | 4  | 3  |
| C04610 | 1  | 2  | 5  | 3  | 6  | 8  | 7  | 10 | 9  | 4  | 11 |
| C07065 | 4  | 6  | 2  | 9  | 8  | 11 | 5  | 1  | 10 | 3  | 7  |
| C10554 | 3  | 5  | 1  | 6  | 7  | 8  | 10 | 9  | 11 | 2  | 4  |
| C12255 | 1  | 11 | 8  | 4  | 10 | 3  | 2  | 5  | 7  | 9  | 6  |
| C10312 | 11 | 1  | 3  | 10 | 5  | 8  | 9  | 4  | 6  | 2  | 7  |

|        |    |    |    |    |    |    |    |    |    |    |    |
|--------|----|----|----|----|----|----|----|----|----|----|----|
| C09599 | 10 | 7  | 4  | 2  | 8  | 3  | 5  | 6  | 1  | 9  | 11 |
| C03621 | 11 | 4  | 2  | 5  | 1  | 9  | 3  | 6  | 10 | 7  | 8  |
| C05104 | 2  | 3  | 8  | 6  | 9  | 11 | 5  | 1  | 7  | 4  | 10 |
| C13101 | 3  | 11 | 6  | 2  | 8  | 10 | 9  | 4  | 5  | 1  | 7  |
| C10033 | 10 | 3  | 9  | 8  | 7  | 5  | 11 | 6  | 2  | 1  | 4  |
| C07384 | 5  | 6  | 10 | 3  | 7  | 8  | 9  | 2  | 4  | 1  | 11 |
| C05028 | 3  | 9  | 11 | 2  | 6  | 7  | 1  | 10 | 5  | 8  | 4  |
| C07220 | 10 | 2  | 5  | 1  | 4  | 11 | 6  | 9  | 7  | 3  | 8  |
| C06316 | 1  | 8  | 2  | 6  | 11 | 7  | 3  | 5  | 10 | 9  | 4  |
| C14209 | 3  | 11 | 10 | 5  | 4  | 6  | 1  | 9  | 7  | 2  | 8  |
| C01397 | 3  | 1  | 10 | 11 | 8  | 6  | 5  | 9  | 2  | 4  | 7  |
| C06351 | 10 | 5  | 11 | 1  | 3  | 6  | 4  | 8  | 2  | 9  | 7  |
| C04071 | 4  | 2  | 9  | 10 | 8  | 6  | 3  | 11 | 1  | 7  | 5  |
| C16454 | 5  | 11 | 6  | 2  | 7  | 8  | 3  | 10 | 9  | 4  | 1  |
| C09263 | 3  | 10 | 8  | 11 | 5  | 2  | 9  | 6  | 1  | 4  | 7  |
| C07580 | 10 | 11 | 8  | 3  | 7  | 9  | 2  | 5  | 1  | 4  | 6  |
| C14508 | 11 | 9  | 6  | 2  | 10 | 8  | 1  | 7  | 3  | 4  | 5  |
| C11199 | 10 | 9  | 5  | 11 | 6  | 3  | 1  | 8  | 7  | 2  | 4  |
| C09643 | 10 | 5  | 11 | 6  | 7  | 3  | 1  | 2  | 9  | 8  | 4  |
| C13138 | 8  | 10 | 9  | 11 | 2  | 6  | 3  | 1  | 5  | 7  | 4  |
| C09269 | 10 | 11 | 2  | 3  | 1  | 6  | 8  | 5  | 4  | 9  | 7  |
| C08007 | 10 | 11 | 2  | 8  | 5  | 3  | 4  | 7  | 1  | 6  | 9  |
| C11510 | 5  | 11 | 9  | 10 | 6  | 3  | 8  | 4  | 7  | 2  | 1  |
| C08064 | 10 | 3  | 1  | 5  | 8  | 11 | 7  | 6  | 9  | 2  | 4  |
| C11064 | 11 | 10 | 5  | 1  | 2  | 4  | 3  | 6  | 9  | 8  | 7  |
| C07403 | 10 | 11 | 5  | 8  | 9  | 2  | 4  | 1  | 6  | 3  | 7  |
| C09741 | 10 | 1  | 5  | 2  | 9  | 6  | 4  | 3  | 8  | 11 | 7  |
| C06158 | 1  | 8  | 2  | 4  | 6  | 3  | 11 | 7  | 9  | 5  | 10 |
| C09176 | 10 | 2  | 1  | 8  | 3  | 7  | 5  | 11 | 9  | 4  | 6  |
| C04584 | 8  | 5  | 11 | 2  | 10 | 6  | 3  | 9  | 1  | 7  | 4  |
| C09738 | 9  | 11 | 10 | 6  | 2  | 8  | 3  | 1  | 5  | 4  | 7  |
| C07415 | 5  | 10 | 11 | 3  | 8  | 4  | 7  | 1  | 2  | 6  | 9  |
| C03212 | 8  | 2  | 1  | 6  | 5  | 4  | 10 | 7  | 9  | 11 | 3  |
| C04606 | 2  | 6  | 9  | 8  | 1  | 7  | 11 | 5  | 3  | 4  | 10 |
| C09366 | 11 | 8  | 5  | 1  | 2  | 4  | 10 | 3  | 7  | 9  | 6  |
| C07876 | 2  | 1  | 8  | 4  | 5  | 10 | 9  | 6  | 11 | 7  | 3  |
| C07657 | 10 | 9  | 5  | 6  | 1  | 4  | 7  | 2  | 3  | 8  | 11 |
| C04209 | 5  | 6  | 8  | 2  | 3  | 10 | 1  | 9  | 4  | 7  | 11 |
| C14234 | 10 | 3  | 11 | 8  | 2  | 7  | 5  | 1  | 4  | 6  | 9  |
| C09153 | 3  | 10 | 5  | 7  | 8  | 9  | 2  | 4  | 11 | 6  | 1  |
| C10848 | 10 | 5  | 1  | 6  | 4  | 7  | 3  | 8  | 11 | 2  | 9  |
| C08280 | 5  | 6  | 11 | 9  | 8  | 1  | 10 | 3  | 7  | 2  | 4  |
| C02678 | 3  | 11 | 6  | 5  | 1  | 2  | 9  | 4  | 7  | 8  | 10 |

|        |    |    |    |    |    |    |    |    |    |    |    |
|--------|----|----|----|----|----|----|----|----|----|----|----|
| C11586 | 11 | 1  | 8  | 3  | 5  | 9  | 4  | 7  | 10 | 6  | 2  |
| C02794 | 5  | 8  | 6  | 2  | 10 | 1  | 11 | 7  | 9  | 4  | 3  |
| C07837 | 1  | 11 | 2  | 8  | 3  | 6  | 9  | 5  | 10 | 7  | 4  |
| C08245 | 1  | 8  | 2  | 11 | 6  | 7  | 5  | 4  | 10 | 3  | 9  |
| C09185 | 8  | 1  | 2  | 11 | 5  | 10 | 3  | 6  | 7  | 4  | 9  |
| C06832 | 5  | 9  | 10 | 11 | 8  | 3  | 2  | 1  | 7  | 4  | 6  |
| C12179 | 10 | 7  | 11 | 6  | 8  | 1  | 4  | 3  | 9  | 2  | 5  |
| C15335 | 3  | 6  | 11 | 5  | 4  | 2  | 7  | 1  | 10 | 8  | 9  |
| C02801 | 2  | 6  | 8  | 7  | 1  | 9  | 10 | 4  | 3  | 5  | 11 |
| C04590 | 9  | 3  | 2  | 10 | 4  | 8  | 5  | 1  | 11 | 7  | 6  |
| C10752 | 10 | 6  | 5  | 1  | 8  | 9  | 3  | 4  | 11 | 2  | 7  |
| C14081 | 3  | 5  | 7  | 10 | 1  | 2  | 11 | 4  | 6  | 9  | 8  |
| C08468 | 5  | 10 | 6  | 2  | 4  | 8  | 3  | 7  | 1  | 11 | 9  |
| C06155 | 1  | 2  | 10 | 3  | 8  | 7  | 11 | 9  | 4  | 5  | 6  |
| C14500 | 3  | 5  | 8  | 4  | 9  | 11 | 1  | 2  | 6  | 7  | 10 |
| C11776 | 5  | 10 | 11 | 8  | 2  | 3  | 9  | 1  | 4  | 7  | 6  |
| C10185 | 10 | 1  | 8  | 2  | 5  | 6  | 9  | 3  | 7  | 4  | 11 |
| C10155 | 10 | 1  | 6  | 7  | 4  | 9  | 11 | 2  | 8  | 3  | 5  |
| C02904 | 2  | 9  | 8  | 6  | 1  | 3  | 4  | 10 | 11 | 5  | 7  |
| C02533 | 2  | 11 | 8  | 5  | 3  | 10 | 4  | 7  | 6  | 1  | 9  |
| C11169 | 9  | 10 | 11 | 8  | 2  | 5  | 3  | 1  | 6  | 7  | 4  |
| C16185 | 3  | 9  | 5  | 1  | 8  | 10 | 11 | 4  | 7  | 6  | 2  |
| C11741 | 5  | 10 | 7  | 6  | 3  | 4  | 1  | 8  | 11 | 9  | 2  |
| C10094 | 2  | 8  | 6  | 11 | 5  | 1  | 4  | 10 | 9  | 7  | 3  |
| C09920 | 3  | 5  | 1  | 8  | 9  | 2  | 6  | 7  | 4  | 11 | 10 |
| C08087 | 6  | 8  | 11 | 5  | 3  | 4  | 10 | 9  | 7  | 1  | 2  |
| C11113 | 4  | 5  | 2  | 9  | 8  | 3  | 1  | 6  | 7  | 10 | 11 |
| C11147 | 2  | 6  | 1  | 11 | 8  | 10 | 9  | 7  | 5  | 4  | 3  |
| C15536 | 6  | 5  | 2  | 1  | 3  | 9  | 8  | 11 | 4  | 10 | 7  |
| C10930 | 11 | 6  | 8  | 4  | 2  | 7  | 9  | 3  | 5  | 1  | 10 |
| C03107 | 1  | 2  | 8  | 10 | 9  | 6  | 7  | 11 | 4  | 3  | 5  |
| C07839 | 11 | 3  | 4  | 9  | 1  | 8  | 6  | 7  | 5  | 2  | 10 |
| C13719 | 10 | 9  | 1  | 5  | 6  | 4  | 3  | 11 | 2  | 8  | 7  |
| C10212 | 11 | 2  | 5  | 1  | 3  | 7  | 10 | 4  | 8  | 9  | 6  |
| C13103 | 9  | 1  | 5  | 3  | 6  | 10 | 7  | 11 | 8  | 2  | 4  |
| C08174 | 3  | 2  | 7  | 9  | 6  | 1  | 10 | 11 | 5  | 8  | 4  |
| C02722 | 2  | 8  | 7  | 5  | 10 | 1  | 11 | 6  | 3  | 4  | 9  |
| C07263 | 2  | 6  | 8  | 7  | 11 | 4  | 5  | 1  | 10 | 9  | 3  |
| C10168 | 10 | 11 | 4  | 9  | 3  | 2  | 6  | 8  | 1  | 5  | 7  |
| C13127 | 10 | 3  | 9  | 11 | 1  | 7  | 6  | 8  | 2  | 5  | 4  |
| C10526 | 10 | 5  | 9  | 11 | 2  | 3  | 1  | 7  | 6  | 8  | 4  |
| C02638 | 6  | 5  | 3  | 2  | 8  | 7  | 9  | 1  | 11 | 10 | 4  |
| C07064 | 1  | 2  | 5  | 11 | 3  | 6  | 4  | 8  | 9  | 7  | 10 |

|        |    |    |    |    |    |    |    |    |    |    |    |
|--------|----|----|----|----|----|----|----|----|----|----|----|
| C01348 | 4  | 10 | 6  | 9  | 8  | 3  | 5  | 2  | 7  | 11 | 1  |
| C11275 | 11 | 1  | 2  | 5  | 3  | 6  | 4  | 8  | 9  | 7  | 10 |
| C12158 | 8  | 2  | 5  | 1  | 4  | 7  | 3  | 9  | 6  | 10 | 11 |
| C01295 | 2  | 6  | 1  | 8  | 4  | 5  | 3  | 11 | 9  | 10 | 7  |
| C10819 | 9  | 5  | 3  | 8  | 4  | 2  | 10 | 7  | 11 | 1  | 6  |
| C06683 | 10 | 6  | 9  | 5  | 2  | 8  | 1  | 4  | 11 | 3  | 7  |
| C13780 | 1  | 2  | 10 | 5  | 11 | 6  | 7  | 3  | 4  | 9  | 8  |
| C01555 | 9  | 10 | 5  | 6  | 1  | 3  | 11 | 7  | 2  | 8  | 4  |
| C14339 | 11 | 5  | 8  | 3  | 10 | 7  | 1  | 9  | 4  | 2  | 6  |
| C02711 | 1  | 5  | 2  | 8  | 10 | 6  | 3  | 11 | 9  | 4  | 7  |
| C08296 | 1  | 5  | 6  | 2  | 8  | 10 | 4  | 3  | 11 | 9  | 7  |
| C05613 | 1  | 5  | 6  | 8  | 2  | 10 | 11 | 3  | 4  | 7  | 9  |
| C13672 | 1  | 2  | 5  | 6  | 9  | 7  | 3  | 4  | 10 | 11 | 8  |
| C02154 | 1  | 2  | 5  | 8  | 6  | 3  | 9  | 11 | 10 | 4  | 7  |
| C08778 | 10 | 2  | 3  | 6  | 5  | 8  | 7  | 11 | 4  | 9  | 1  |
| C03042 | 2  | 8  | 3  | 5  | 1  | 6  | 10 | 4  | 9  | 7  | 11 |
| C06419 | 5  | 6  | 2  | 1  | 8  | 10 | 4  | 9  | 3  | 7  | 11 |
| C02390 | 11 | 8  | 6  | 2  | 5  | 1  | 9  | 7  | 10 | 3  | 4  |
| C10603 | 6  | 10 | 5  | 11 | 8  | 3  | 7  | 9  | 1  | 2  | 4  |
| C16421 | 5  | 1  | 2  | 10 | 9  | 8  | 3  | 4  | 7  | 6  | 11 |
| C10354 | 11 | 5  | 4  | 8  | 10 | 6  | 9  | 2  | 3  | 7  | 1  |
| C10334 | 11 | 10 | 2  | 9  | 1  | 8  | 3  | 6  | 7  | 5  | 4  |
| C14706 | 11 | 4  | 1  | 5  | 9  | 8  | 10 | 2  | 7  | 6  | 3  |
| C10273 | 1  | 10 | 6  | 7  | 11 | 5  | 3  | 9  | 2  | 8  | 4  |
| C08450 | 11 | 10 | 9  | 2  | 1  | 8  | 4  | 6  | 3  | 5  | 7  |
| C08425 | 10 | 5  | 11 | 2  | 3  | 7  | 4  | 1  | 8  | 6  | 9  |
| C09567 | 10 | 11 | 2  | 9  | 5  | 8  | 7  | 1  | 3  | 4  | 6  |
| C03462 | 2  | 10 | 4  | 9  | 6  | 5  | 8  | 1  | 3  | 11 | 7  |
| C14595 | 11 | 3  | 4  | 9  | 8  | 5  | 6  | 10 | 2  | 1  | 7  |
| C13765 | 10 | 9  | 1  | 5  | 2  | 4  | 8  | 11 | 6  | 3  | 7  |
| C06325 | 5  | 8  | 10 | 1  | 2  | 11 | 6  | 9  | 4  | 3  | 7  |
| C02015 | 8  | 3  | 5  | 1  | 9  | 11 | 2  | 6  | 4  | 10 | 7  |
| C02781 | 1  | 2  | 10 | 5  | 6  | 8  | 9  | 4  | 3  | 11 | 7  |
| C02809 | 11 | 9  | 10 | 2  | 5  | 1  | 8  | 3  | 4  | 6  | 7  |
| C12117 | 1  | 11 | 5  | 9  | 7  | 6  | 8  | 3  | 10 | 2  | 4  |
| C08880 | 5  | 10 | 1  | 3  | 4  | 9  | 6  | 11 | 7  | 2  | 8  |
| C05930 | 2  | 6  | 5  | 9  | 10 | 4  | 3  | 1  | 7  | 11 | 8  |
| C14010 | 10 | 9  | 11 | 6  | 5  | 2  | 1  | 8  | 3  | 7  | 4  |
| C12862 | 11 | 1  | 9  | 8  | 5  | 3  | 7  | 2  | 4  | 10 | 6  |
| C06373 | 1  | 2  | 3  | 5  | 8  | 9  | 6  | 4  | 10 | 11 | 7  |
| C07489 | 11 | 1  | 8  | 5  | 3  | 9  | 10 | 4  | 6  | 7  | 2  |
| C07105 | 3  | 5  | 1  | 8  | 10 | 4  | 11 | 9  | 7  | 2  | 6  |
| C10843 | 10 | 3  | 1  | 5  | 9  | 2  | 8  | 11 | 7  | 6  | 4  |



|        |    |    |    |    |    |    |    |    |    |    |    |
|--------|----|----|----|----|----|----|----|----|----|----|----|
| C04047 | 1  | 5  | 3  | 11 | 8  | 6  | 2  | 9  | 10 | 7  | 4  |
| C11526 | 1  | 2  | 4  | 10 | 7  | 6  | 5  | 8  | 9  | 3  | 11 |
| C09334 | 10 | 8  | 9  | 11 | 6  | 3  | 1  | 7  | 4  | 5  | 2  |
| C14134 | 3  | 11 | 10 | 1  | 9  | 5  | 7  | 4  | 2  | 8  | 6  |
| C03474 | 11 | 1  | 4  | 10 | 3  | 8  | 5  | 9  | 2  | 6  | 7  |
| C10517 | 1  | 9  | 4  | 2  | 3  | 8  | 7  | 6  | 11 | 10 | 5  |
| C08643 | 1  | 10 | 6  | 4  | 8  | 7  | 9  | 3  | 11 | 2  | 5  |
| C02778 | 11 | 1  | 4  | 8  | 5  | 6  | 2  | 9  | 3  | 10 | 7  |
| C10490 | 11 | 9  | 10 | 5  | 4  | 2  | 8  | 6  | 3  | 1  | 7  |
| C03169 | 4  | 1  | 11 | 2  | 8  | 7  | 9  | 10 | 6  | 5  | 3  |
| C13688 | 5  | 1  | 8  | 10 | 6  | 9  | 2  | 3  | 11 | 7  | 4  |
| C09203 | 10 | 5  | 1  | 2  | 6  | 3  | 4  | 8  | 11 | 7  | 9  |
| C08345 | 6  | 1  | 10 | 5  | 11 | 8  | 4  | 9  | 3  | 7  | 2  |
| C15479 | 1  | 10 | 7  | 3  | 6  | 4  | 5  | 2  | 9  | 11 | 8  |
| C14565 | 11 | 9  | 8  | 3  | 2  | 10 | 4  | 5  | 1  | 6  | 7  |
| C02155 | 5  | 6  | 10 | 8  | 7  | 2  | 1  | 11 | 4  | 3  | 9  |
| C01844 | 3  | 9  | 5  | 8  | 1  | 2  | 10 | 11 | 6  | 7  | 4  |
| C08305 | 11 | 1  | 3  | 6  | 4  | 10 | 7  | 5  | 8  | 2  | 9  |
| C07355 | 3  | 8  | 2  | 4  | 7  | 5  | 11 | 9  | 1  | 10 | 6  |
| C08294 | 5  | 2  | 9  | 10 | 8  | 11 | 3  | 1  | 7  | 4  | 6  |
| C10659 | 3  | 10 | 9  | 7  | 5  | 6  | 1  | 2  | 4  | 8  | 11 |
| C10163 | 11 | 2  | 5  | 1  | 6  | 4  | 10 | 7  | 9  | 3  | 8  |
| C04217 | 9  | 8  | 2  | 6  | 3  | 5  | 11 | 4  | 1  | 10 | 7  |
| C02115 | 5  | 8  | 2  | 6  | 7  | 1  | 3  | 4  | 11 | 10 | 9  |
| C00150 | 2  | 1  | 5  | 11 | 8  | 6  | 4  | 9  | 10 | 7  | 3  |
| C04625 | 11 | 1  | 9  | 8  | 6  | 10 | 5  | 3  | 2  | 7  | 4  |
| C04303 | 2  | 1  | 11 | 8  | 5  | 4  | 6  | 10 | 7  | 9  | 3  |
| C10327 | 11 | 10 | 2  | 6  | 8  | 3  | 1  | 4  | 5  | 9  | 7  |
| C00820 | 5  | 1  | 6  | 2  | 8  | 10 | 9  | 4  | 3  | 11 | 7  |
| C08838 | 9  | 3  | 4  | 6  | 10 | 2  | 1  | 5  | 8  | 11 | 7  |
| C05241 | 4  | 5  | 2  | 11 | 10 | 6  | 1  | 8  | 3  | 7  | 9  |
| C10608 | 11 | 8  | 9  | 5  | 10 | 6  | 3  | 4  | 2  | 7  | 1  |
| C10706 | 10 | 9  | 11 | 5  | 4  | 6  | 1  | 3  | 7  | 8  | 2  |
| C08163 | 3  | 11 | 9  | 5  | 2  | 7  | 1  | 10 | 4  | 8  | 6  |
| C07445 | 5  | 10 | 11 | 3  | 4  | 8  | 9  | 1  | 7  | 6  | 2  |
| C02866 | 1  | 3  | 8  | 6  | 10 | 5  | 9  | 4  | 11 | 2  | 7  |
| C06522 | 5  | 6  | 10 | 8  | 2  | 11 | 1  | 3  | 4  | 7  | 9  |
| C10764 | 10 | 5  | 2  | 8  | 7  | 9  | 4  | 3  | 11 | 1  | 6  |
| C11308 | 1  | 11 | 5  | 3  | 2  | 6  | 8  | 7  | 9  | 10 | 4  |
| C05377 | 8  | 1  | 2  | 11 | 6  | 5  | 3  | 10 | 9  | 4  | 7  |
| C08493 | 5  | 11 | 10 | 6  | 8  | 2  | 1  | 9  | 4  | 3  | 7  |
| C11186 | 2  | 5  | 4  | 6  | 11 | 3  | 9  | 8  | 1  | 7  | 10 |
| C04197 | 1  | 10 | 9  | 4  | 3  | 5  | 8  | 2  | 11 | 6  | 7  |

|        |    |    |    |    |    |    |    |    |    |    |    |
|--------|----|----|----|----|----|----|----|----|----|----|----|
| C10117 | 3  | 8  | 11 | 5  | 4  | 2  | 6  | 7  | 1  | 10 | 9  |
| C07023 | 10 | 5  | 11 | 9  | 8  | 2  | 1  | 4  | 3  | 6  | 7  |
| C06852 | 5  | 10 | 3  | 6  | 7  | 2  | 4  | 1  | 11 | 8  | 9  |
| C01389 | 9  | 8  | 3  | 4  | 2  | 10 | 5  | 1  | 6  | 11 | 7  |
| C11502 | 8  | 2  | 11 | 5  | 6  | 7  | 9  | 10 | 3  | 4  | 1  |
| C09868 | 9  | 2  | 8  | 6  | 11 | 5  | 3  | 10 | 7  | 4  | 1  |
| C10784 | 1  | 5  | 11 | 6  | 4  | 2  | 7  | 8  | 10 | 9  | 3  |
| C08197 | 10 | 5  | 11 | 2  | 3  | 8  | 6  | 4  | 7  | 1  | 9  |
| C08201 | 1  | 3  | 2  | 10 | 5  | 6  | 9  | 8  | 7  | 11 | 4  |
| C07773 | 10 | 11 | 8  | 1  | 2  | 9  | 4  | 6  | 7  | 3  | 5  |
| C13505 | 6  | 10 | 1  | 5  | 8  | 2  | 9  | 11 | 3  | 7  | 4  |
| C15603 | 11 | 8  | 1  | 2  | 5  | 10 | 6  | 9  | 4  | 3  | 7  |
| C07505 | 11 | 10 | 6  | 5  | 1  | 8  | 2  | 7  | 4  | 9  | 3  |
| C01849 | 9  | 8  | 2  | 1  | 3  | 11 | 10 | 4  | 6  | 7  | 5  |
| C11153 | 9  | 10 | 11 | 4  | 8  | 1  | 3  | 6  | 5  | 7  | 2  |
| C12347 | 4  | 2  | 9  | 7  | 6  | 3  | 1  | 5  | 11 | 8  | 10 |
| C08766 | 1  | 3  | 10 | 4  | 2  | 11 | 5  | 9  | 6  | 7  | 8  |
| C10987 | 4  | 2  | 7  | 11 | 9  | 8  | 5  | 1  | 6  | 10 | 3  |
| C11345 | 5  | 2  | 1  | 4  | 8  | 3  | 10 | 9  | 7  | 6  | 11 |
| C10128 | 10 | 8  | 11 | 5  | 1  | 6  | 4  | 7  | 3  | 9  | 2  |
| C10781 | 10 | 2  | 11 | 5  | 3  | 6  | 4  | 9  | 1  | 7  | 8  |
| C07457 | 3  | 10 | 2  | 6  | 5  | 9  | 8  | 4  | 7  | 11 | 1  |
| C08217 | 5  | 8  | 3  | 6  | 9  | 2  | 11 | 1  | 4  | 10 | 7  |
| C12446 | 9  | 7  | 5  | 11 | 6  | 8  | 3  | 2  | 4  | 10 | 1  |
| C04105 | 11 | 8  | 2  | 5  | 1  | 10 | 9  | 4  | 7  | 3  | 6  |
| C10321 | 10 | 6  | 9  | 11 | 4  | 5  | 1  | 3  | 7  | 8  | 2  |
| C09120 | 10 | 9  | 1  | 7  | 6  | 8  | 3  | 11 | 5  | 2  | 4  |
| C10347 | 10 | 5  | 7  | 1  | 3  | 2  | 6  | 8  | 9  | 11 | 4  |
| C03711 | 5  | 9  | 11 | 2  | 8  | 10 | 4  | 3  | 7  | 1  | 6  |
| C09259 | 10 | 6  | 5  | 8  | 2  | 1  | 11 | 9  | 3  | 4  | 7  |
| C07438 | 5  | 10 | 1  | 11 | 9  | 4  | 8  | 6  | 3  | 7  | 2  |
| C02019 | 11 | 2  | 1  | 8  | 5  | 10 | 9  | 3  | 6  | 4  | 7  |
| C01572 | 10 | 11 | 8  | 2  | 5  | 1  | 4  | 9  | 3  | 7  | 6  |
| C14491 | 3  | 6  | 7  | 4  | 2  | 11 | 1  | 5  | 10 | 8  | 9  |
| C14687 | 1  | 2  | 5  | 11 | 3  | 6  | 9  | 8  | 7  | 10 | 4  |
| C09840 | 9  | 11 | 10 | 5  | 3  | 6  | 1  | 8  | 2  | 4  | 7  |
| C10319 | 10 | 9  | 11 | 1  | 6  | 4  | 3  | 8  | 2  | 5  | 7  |
| C07324 | 10 | 1  | 11 | 9  | 3  | 2  | 5  | 4  | 6  | 8  | 7  |
| C03527 | 2  | 11 | 8  | 1  | 9  | 6  | 5  | 4  | 10 | 3  | 7  |
| C12637 | 10 | 2  | 4  | 1  | 11 | 3  | 6  | 8  | 9  | 7  | 5  |
| C02791 | 11 | 3  | 8  | 9  | 1  | 5  | 6  | 10 | 2  | 7  | 4  |
| C08057 | 6  | 5  | 8  | 1  | 2  | 9  | 7  | 11 | 4  | 10 | 3  |
| C00317 | 1  | 9  | 10 | 4  | 2  | 3  | 5  | 7  | 8  | 11 | 6  |

|        |    |    |    |    |    |    |    |    |    |    |    |
|--------|----|----|----|----|----|----|----|----|----|----|----|
| C12796 | 9  | 10 | 3  | 5  | 11 | 8  | 4  | 1  | 2  | 7  | 6  |
| C07437 | 11 | 4  | 9  | 1  | 10 | 3  | 6  | 7  | 5  | 8  | 2  |
| C02948 | 11 | 3  | 8  | 5  | 6  | 10 | 9  | 2  | 4  | 1  | 7  |
| C07554 | 10 | 2  | 5  | 9  | 1  | 8  | 7  | 4  | 3  | 6  | 11 |
| C09207 | 6  | 10 | 5  | 4  | 3  | 1  | 8  | 9  | 7  | 11 | 2  |
| C10704 | 11 | 9  | 10 | 8  | 6  | 7  | 3  | 1  | 5  | 4  | 2  |
| C07581 | 8  | 5  | 2  | 6  | 10 | 4  | 11 | 1  | 7  | 9  | 3  |
| C08176 | 3  | 9  | 6  | 8  | 4  | 11 | 2  | 10 | 5  | 1  | 7  |
| C01590 | 2  | 10 | 8  | 6  | 5  | 9  | 1  | 4  | 11 | 3  | 7  |
| C03537 | 6  | 3  | 5  | 9  | 11 | 8  | 2  | 1  | 4  | 10 | 7  |
| C10301 | 10 | 9  | 1  | 6  | 3  | 11 | 8  | 2  | 7  | 4  | 5  |
| C03032 | 10 | 1  | 5  | 2  | 4  | 3  | 11 | 9  | 6  | 8  | 7  |
| C10981 | 11 | 3  | 1  | 10 | 2  | 7  | 6  | 8  | 9  | 4  | 5  |
| C15562 | 5  | 11 | 2  | 10 | 6  | 8  | 1  | 4  | 3  | 9  | 7  |
| C03685 | 9  | 6  | 2  | 1  | 7  | 4  | 3  | 10 | 8  | 5  | 11 |
| C07530 | 5  | 11 | 10 | 9  | 6  | 4  | 7  | 1  | 3  | 2  | 8  |
| C12167 | 10 | 11 | 2  | 5  | 3  | 7  | 1  | 8  | 9  | 4  | 6  |
| C10263 | 10 | 5  | 6  | 7  | 4  | 1  | 3  | 9  | 2  | 11 | 8  |
| C01853 | 1  | 11 | 2  | 5  | 4  | 6  | 8  | 9  | 10 | 3  | 7  |
| C13326 | 1  | 11 | 5  | 4  | 8  | 2  | 10 | 9  | 6  | 3  | 7  |
| C06855 | 10 | 5  | 11 | 8  | 2  | 1  | 3  | 4  | 7  | 9  | 6  |
| C06722 | 2  | 8  | 11 | 1  | 5  | 6  | 7  | 4  | 3  | 9  | 10 |
| C00959 | 3  | 1  | 4  | 5  | 8  | 6  | 10 | 7  | 11 | 2  | 9  |
| C10590 | 1  | 9  | 10 | 4  | 3  | 2  | 8  | 5  | 6  | 7  | 11 |
| C11079 | 11 | 10 | 9  | 2  | 5  | 4  | 8  | 6  | 3  | 1  | 7  |
| C15488 | 11 | 1  | 9  | 3  | 2  | 8  | 6  | 5  | 4  | 10 | 7  |
| C10396 | 10 | 1  | 6  | 11 | 9  | 4  | 8  | 3  | 5  | 7  | 2  |
| C07817 | 3  | 5  | 2  | 4  | 1  | 6  | 10 | 9  | 11 | 7  | 8  |
| C10937 | 11 | 10 | 5  | 2  | 7  | 6  | 4  | 1  | 8  | 3  | 9  |
| C08764 | 10 | 6  | 11 | 8  | 4  | 3  | 1  | 7  | 5  | 9  | 2  |
| C13757 | 6  | 11 | 2  | 9  | 1  | 3  | 8  | 10 | 7  | 5  | 4  |
| C14221 | 10 | 5  | 6  | 9  | 3  | 4  | 8  | 7  | 11 | 1  | 2  |
| C06121 | 3  | 7  | 6  | 8  | 4  | 5  | 11 | 10 | 2  | 9  | 1  |
| C13927 | 6  | 5  | 8  | 2  | 10 | 1  | 9  | 11 | 4  | 3  | 7  |
| C10770 | 11 | 6  | 10 | 4  | 8  | 7  | 5  | 3  | 1  | 9  | 2  |
| C07525 | 8  | 5  | 10 | 6  | 11 | 1  | 3  | 2  | 9  | 4  | 7  |
| C07404 | 5  | 10 | 9  | 11 | 2  | 4  | 3  | 1  | 6  | 8  | 7  |
| C14606 | 3  | 4  | 2  | 6  | 7  | 10 | 11 | 1  | 8  | 9  | 5  |
| C14227 | 11 | 3  | 4  | 7  | 2  | 10 | 6  | 1  | 8  | 5  | 9  |
| C07381 | 10 | 1  | 8  | 6  | 11 | 9  | 4  | 3  | 2  | 5  | 7  |
| C12311 | 1  | 11 | 5  | 9  | 2  | 6  | 4  | 10 | 3  | 8  | 7  |
| C09524 | 2  | 10 | 9  | 8  | 6  | 5  | 4  | 3  | 1  | 11 | 7  |
| C03919 | 4  | 8  | 6  | 2  | 1  | 11 | 5  | 9  | 10 | 3  | 7  |

|        |    |    |    |    |    |    |    |    |    |    |    |
|--------|----|----|----|----|----|----|----|----|----|----|----|
| C00808 | 9  | 8  | 2  | 11 | 5  | 6  | 1  | 3  | 10 | 4  | 7  |
| C07533 | 5  | 10 | 1  | 4  | 2  | 6  | 8  | 11 | 3  | 9  | 7  |
| C13077 | 3  | 5  | 9  | 8  | 4  | 6  | 2  | 11 | 7  | 1  | 10 |
| C09359 | 9  | 6  | 1  | 4  | 7  | 11 | 5  | 8  | 3  | 10 | 2  |
| C11182 | 11 | 5  | 1  | 4  | 10 | 6  | 8  | 2  | 3  | 9  | 7  |
| C07413 | 3  | 4  | 1  | 2  | 7  | 11 | 5  | 8  | 10 | 6  | 9  |
| C14432 | 11 | 5  | 9  | 8  | 1  | 10 | 6  | 3  | 2  | 7  | 4  |
| C06944 | 3  | 5  | 11 | 4  | 2  | 6  | 10 | 1  | 8  | 7  | 9  |
| C12231 | 10 | 6  | 4  | 1  | 9  | 2  | 8  | 3  | 7  | 5  | 11 |
| C12942 | 1  | 2  | 5  | 8  | 11 | 10 | 6  | 3  | 4  | 9  | 7  |
| C16294 | 10 | 8  | 4  | 6  | 1  | 5  | 2  | 7  | 9  | 11 | 3  |
| C09387 | 10 | 5  | 2  | 9  | 7  | 6  | 3  | 4  | 1  | 8  | 11 |
| C09737 | 8  | 2  | 3  | 9  | 10 | 4  | 11 | 7  | 1  | 5  | 6  |
| C02498 | 11 | 9  | 3  | 2  | 8  | 1  | 6  | 5  | 7  | 4  | 10 |
| C11769 | 5  | 4  | 10 | 9  | 6  | 1  | 11 | 3  | 2  | 7  | 8  |
| C00738 | 1  | 2  | 10 | 5  | 6  | 8  | 3  | 4  | 11 | 9  | 7  |
| C08065 | 9  | 11 | 5  | 3  | 7  | 4  | 2  | 1  | 8  | 6  | 10 |
| C09628 | 9  | 2  | 4  | 6  | 5  | 3  | 8  | 10 | 11 | 7  | 1  |
| C10204 | 10 | 7  | 3  | 9  | 4  | 6  | 11 | 8  | 1  | 5  | 2  |
| C00451 | 1  | 2  | 5  | 8  | 6  | 11 | 3  | 4  | 9  | 10 | 7  |
| C14150 | 11 | 2  | 5  | 3  | 6  | 4  | 8  | 1  | 10 | 9  | 7  |
| C08233 | 9  | 3  | 2  | 10 | 5  | 11 | 4  | 7  | 8  | 6  | 1  |
| C05003 | 1  | 2  | 5  | 6  | 8  | 3  | 10 | 11 | 9  | 4  | 7  |
| C10842 | 10 | 5  | 3  | 11 | 9  | 2  | 8  | 1  | 4  | 7  | 6  |
| C14476 | 10 | 9  | 3  | 11 | 8  | 5  | 2  | 4  | 1  | 7  | 6  |
| C10890 | 3  | 5  | 4  | 6  | 7  | 10 | 11 | 8  | 2  | 9  | 1  |
| C11248 | 9  | 10 | 11 | 1  | 7  | 3  | 2  | 6  | 4  | 5  | 8  |
| C09257 | 10 | 1  | 9  | 2  | 3  | 7  | 4  | 11 | 8  | 5  | 6  |
| C15658 | 9  | 10 | 6  | 5  | 11 | 1  | 8  | 2  | 7  | 3  | 4  |
| C15233 | 1  | 5  | 2  | 8  | 6  | 11 | 10 | 4  | 9  | 3  | 7  |
| C11181 | 1  | 5  | 2  | 4  | 6  | 11 | 10 | 9  | 8  | 3  | 7  |
| C15609 | 2  | 8  | 6  | 11 | 3  | 1  | 4  | 9  | 7  | 5  | 10 |
| C09788 | 9  | 10 | 5  | 11 | 8  | 2  | 6  | 3  | 7  | 4  | 1  |
| C08858 | 10 | 3  | 9  | 4  | 8  | 6  | 2  | 1  | 7  | 11 | 5  |
| C02632 | 5  | 1  | 2  | 11 | 9  | 6  | 8  | 10 | 4  | 3  | 7  |
| C10918 | 11 | 5  | 10 | 2  | 7  | 9  | 8  | 6  | 4  | 3  | 1  |
| C14441 | 1  | 11 | 3  | 8  | 6  | 2  | 5  | 10 | 4  | 9  | 7  |
| C14354 | 11 | 8  | 9  | 2  | 1  | 3  | 10 | 7  | 4  | 6  | 5  |
| C07205 | 3  | 2  | 9  | 4  | 11 | 8  | 6  | 10 | 5  | 7  | 1  |
| C10115 | 10 | 1  | 6  | 11 | 2  | 7  | 3  | 9  | 4  | 5  | 8  |
| C11622 | 8  | 2  | 10 | 6  | 4  | 1  | 9  | 5  | 3  | 11 | 7  |
| C08988 | 10 | 9  | 5  | 11 | 3  | 1  | 8  | 2  | 6  | 4  | 7  |
| C10276 | 10 | 5  | 9  | 1  | 2  | 8  | 7  | 11 | 6  | 3  | 4  |

|        |    |    |    |    |    |    |    |    |    |    |    |
|--------|----|----|----|----|----|----|----|----|----|----|----|
| C11629 | 3  | 8  | 2  | 9  | 5  | 6  | 7  | 4  | 11 | 1  | 10 |
| C11688 | 10 | 5  | 11 | 3  | 8  | 4  | 1  | 9  | 7  | 6  | 2  |
| C07609 | 10 | 5  | 9  | 6  | 2  | 8  | 11 | 3  | 4  | 1  | 7  |
| C01452 | 1  | 2  | 6  | 8  | 5  | 9  | 10 | 11 | 4  | 3  | 7  |
| C04548 | 5  | 10 | 3  | 11 | 9  | 8  | 4  | 7  | 1  | 6  | 2  |
| C09232 | 2  | 6  | 7  | 8  | 11 | 9  | 3  | 5  | 10 | 1  | 4  |
| C13310 | 1  | 3  | 10 | 4  | 8  | 11 | 2  | 9  | 6  | 7  | 5  |
| C10314 | 11 | 10 | 5  | 9  | 3  | 4  | 7  | 1  | 2  | 6  | 8  |
| C01937 | 11 | 4  | 8  | 2  | 5  | 1  | 3  | 9  | 6  | 10 | 7  |
| C08745 | 10 | 5  | 11 | 2  | 4  | 3  | 6  | 8  | 7  | 1  | 9  |
| C12233 | 10 | 6  | 9  | 1  | 2  | 3  | 4  | 11 | 8  | 7  | 5  |
| C10832 | 10 | 8  | 11 | 5  | 6  | 9  | 1  | 3  | 2  | 4  | 7  |
| C10093 | 10 | 3  | 2  | 6  | 9  | 5  | 11 | 7  | 4  | 8  | 1  |
| C10317 | 1  | 3  | 4  | 2  | 7  | 10 | 9  | 6  | 8  | 11 | 5  |
| C02578 | 1  | 10 | 11 | 5  | 7  | 6  | 8  | 2  | 4  | 9  | 3  |
| C10792 | 11 | 5  | 8  | 1  | 10 | 6  | 4  | 3  | 9  | 2  | 7  |
| C01621 | 1  | 10 | 6  | 2  | 3  | 8  | 11 | 9  | 4  | 7  | 5  |
| C15629 | 5  | 3  | 9  | 8  | 6  | 11 | 2  | 1  | 4  | 10 | 7  |
| C10284 | 10 | 2  | 5  | 3  | 1  | 7  | 6  | 9  | 11 | 8  | 4  |
| C03049 | 1  | 9  | 4  | 3  | 6  | 11 | 5  | 10 | 2  | 8  | 7  |
| C07340 | 1  | 3  | 5  | 2  | 7  | 8  | 10 | 4  | 6  | 11 | 9  |
| C11110 | 11 | 9  | 1  | 10 | 3  | 8  | 2  | 5  | 7  | 4  | 6  |
| C09196 | 10 | 9  | 4  | 2  | 11 | 6  | 7  | 3  | 5  | 8  | 1  |
| C10309 | 8  | 2  | 9  | 4  | 10 | 7  | 1  | 11 | 3  | 6  | 5  |
| C01448 | 2  | 8  | 6  | 11 | 9  | 5  | 4  | 7  | 10 | 3  | 1  |
| C11837 | 5  | 6  | 11 | 3  | 1  | 9  | 2  | 10 | 4  | 8  | 7  |
| C01950 | 8  | 11 | 3  | 2  | 6  | 5  | 10 | 9  | 1  | 4  | 7  |
| C15618 | 5  | 2  | 6  | 8  | 4  | 3  | 7  | 10 | 1  | 9  | 11 |
| C14138 | 11 | 2  | 10 | 9  | 5  | 1  | 4  | 3  | 6  | 8  | 7  |
| C08113 | 10 | 9  | 6  | 5  | 11 | 7  | 3  | 2  | 4  | 8  | 1  |
| C07765 | 11 | 5  | 4  | 3  | 8  | 7  | 10 | 6  | 1  | 9  | 2  |
| C02975 | 2  | 6  | 8  | 11 | 5  | 3  | 10 | 7  | 1  | 4  | 9  |
| C08819 | 9  | 3  | 6  | 8  | 2  | 10 | 4  | 11 | 5  | 1  | 7  |
| C08091 | 11 | 4  | 2  | 10 | 9  | 3  | 1  | 5  | 6  | 8  | 7  |
| C02822 | 2  | 4  | 7  | 8  | 3  | 5  | 1  | 9  | 6  | 11 | 10 |
| C10040 | 10 | 1  | 3  | 8  | 4  | 9  | 11 | 2  | 6  | 7  | 5  |
| C04067 | 2  | 6  | 8  | 10 | 4  | 1  | 3  | 9  | 11 | 7  | 5  |
| C13769 | 10 | 11 | 3  | 8  | 9  | 5  | 2  | 7  | 4  | 1  | 6  |
| C06467 | 1  | 2  | 10 | 5  | 6  | 8  | 3  | 4  | 11 | 9  | 7  |
| C07463 | 5  | 9  | 3  | 10 | 11 | 4  | 2  | 6  | 7  | 1  | 8  |
| C14972 | 3  | 8  | 4  | 9  | 11 | 7  | 10 | 6  | 2  | 1  | 5  |
| C06885 | 10 | 9  | 6  | 5  | 7  | 8  | 4  | 3  | 11 | 1  | 2  |
| C08166 | 3  | 11 | 9  | 10 | 6  | 5  | 2  | 7  | 4  | 1  | 8  |

|        |    |    |    |    |    |    |    |    |    |    |    |
|--------|----|----|----|----|----|----|----|----|----|----|----|
| C14349 | 11 | 5  | 8  | 4  | 9  | 6  | 3  | 1  | 7  | 2  | 10 |
| C08908 | 10 | 1  | 11 | 4  | 2  | 7  | 8  | 3  | 5  | 6  | 9  |
| C04524 | 2  | 11 | 8  | 1  | 3  | 7  | 9  | 5  | 4  | 6  | 10 |
| C08278 | 5  | 1  | 11 | 3  | 8  | 2  | 9  | 6  | 4  | 7  | 10 |
| C14230 | 11 | 5  | 3  | 9  | 1  | 6  | 8  | 2  | 4  | 10 | 7  |
| C11723 | 11 | 3  | 10 | 5  | 9  | 1  | 4  | 8  | 6  | 2  | 7  |
| C11488 | 2  | 6  | 1  | 11 | 10 | 3  | 9  | 7  | 4  | 8  | 5  |
| C10796 | 9  | 10 | 4  | 8  | 2  | 3  | 1  | 7  | 6  | 11 | 5  |
| C07124 | 3  | 5  | 8  | 7  | 11 | 9  | 10 | 1  | 4  | 2  | 6  |
| C11090 | 11 | 3  | 10 | 1  | 2  | 9  | 5  | 6  | 4  | 8  | 7  |
| C06688 | 9  | 10 | 11 | 8  | 6  | 3  | 4  | 1  | 5  | 7  | 2  |
| C10809 | 11 | 10 | 5  | 2  | 8  | 6  | 1  | 4  | 9  | 3  | 7  |
| C09231 | 9  | 11 | 6  | 10 | 4  | 3  | 7  | 2  | 8  | 1  | 5  |
| C04456 | 1  | 2  | 9  | 4  | 10 | 11 | 6  | 3  | 8  | 5  | 7  |
| C06523 | 10 | 5  | 6  | 2  | 8  | 9  | 3  | 11 | 7  | 1  | 4  |
| C09037 | 10 | 5  | 8  | 7  | 2  | 3  | 6  | 11 | 9  | 1  | 4  |
| C03870 | 10 | 1  | 2  | 9  | 8  | 3  | 4  | 5  | 11 | 6  | 7  |
| C10034 | 10 | 8  | 5  | 2  | 11 | 1  | 6  | 4  | 3  | 7  | 9  |
| C04380 | 4  | 1  | 2  | 9  | 11 | 5  | 10 | 3  | 8  | 7  | 6  |
| C07736 | 3  | 9  | 2  | 5  | 1  | 11 | 6  | 7  | 8  | 4  | 10 |
| C11594 | 8  | 4  | 5  | 2  | 3  | 1  | 11 | 7  | 9  | 6  | 10 |
| C00597 | 1  | 2  | 5  | 8  | 6  | 4  | 3  | 11 | 9  | 10 | 7  |
| C00825 | 10 | 3  | 6  | 9  | 8  | 2  | 11 | 1  | 5  | 4  | 7  |
| C06695 | 11 | 5  | 2  | 4  | 3  | 6  | 8  | 7  | 9  | 10 | 1  |
| C01816 | 11 | 9  | 2  | 10 | 3  | 6  | 1  | 7  | 5  | 8  | 4  |
| C05201 | 5  | 10 | 9  | 11 | 1  | 7  | 2  | 8  | 3  | 6  | 4  |
| C14060 | 10 | 9  | 3  | 7  | 4  | 11 | 6  | 1  | 5  | 2  | 8  |
| C10195 | 10 | 5  | 11 | 8  | 4  | 2  | 9  | 6  | 7  | 3  | 1  |
| C07818 | 10 | 11 | 3  | 8  | 9  | 1  | 2  | 7  | 5  | 4  | 6  |
| C04290 | 9  | 10 | 5  | 2  | 8  | 6  | 3  | 4  | 7  | 11 | 1  |
| C10428 | 9  | 5  | 10 | 11 | 4  | 1  | 8  | 2  | 7  | 3  | 6  |
| C03015 | 6  | 2  | 5  | 8  | 4  | 11 | 1  | 9  | 7  | 3  | 10 |
| C14197 | 5  | 6  | 4  | 9  | 1  | 3  | 7  | 10 | 11 | 8  | 2  |
| C00326 | 1  | 3  | 2  | 7  | 4  | 8  | 10 | 5  | 11 | 9  | 6  |
| C04867 | 2  | 10 | 8  | 6  | 7  | 11 | 9  | 3  | 1  | 5  | 4  |
| C10606 | 10 | 9  | 3  | 6  | 11 | 4  | 8  | 7  | 2  | 5  | 1  |
| C03709 | 2  | 10 | 5  | 9  | 4  | 1  | 6  | 3  | 11 | 7  | 8  |
| C10413 | 10 | 9  | 6  | 5  | 2  | 11 | 8  | 4  | 7  | 1  | 3  |
| C07318 | 10 | 9  | 11 | 5  | 8  | 6  | 3  | 2  | 7  | 1  | 4  |
| C01691 | 5  | 11 | 10 | 9  | 1  | 3  | 8  | 2  | 4  | 6  | 7  |
| C13391 | 3  | 2  | 1  | 7  | 8  | 5  | 11 | 10 | 9  | 6  | 4  |
| C07875 | 11 | 10 | 7  | 6  | 9  | 2  | 8  | 3  | 5  | 4  | 1  |
| C07547 | 10 | 5  | 6  | 2  | 8  | 1  | 11 | 3  | 4  | 9  | 7  |

|        |    |    |    |    |    |    |    |    |    |    |    |
|--------|----|----|----|----|----|----|----|----|----|----|----|
| C07063 | 5  | 10 | 3  | 2  | 1  | 9  | 8  | 4  | 11 | 6  | 7  |
| C12568 | 1  | 11 | 2  | 5  | 3  | 6  | 4  | 10 | 9  | 7  | 8  |
| C03422 | 3  | 7  | 8  | 9  | 10 | 2  | 5  | 11 | 6  | 4  | 1  |
| C15758 | 9  | 6  | 5  | 8  | 4  | 3  | 1  | 11 | 2  | 7  | 10 |
| C01926 | 3  | 1  | 10 | 2  | 5  | 8  | 6  | 4  | 9  | 11 | 7  |
| C14161 | 9  | 1  | 2  | 5  | 8  | 11 | 6  | 4  | 10 | 3  | 7  |
| C10294 | 10 | 11 | 2  | 5  | 1  | 6  | 3  | 7  | 9  | 8  | 4  |
| C07309 | 10 | 5  | 1  | 4  | 3  | 9  | 2  | 8  | 6  | 11 | 7  |
| C03799 | 4  | 1  | 9  | 3  | 10 | 2  | 6  | 5  | 11 | 8  | 7  |
| C01390 | 9  | 1  | 2  | 8  | 7  | 3  | 10 | 11 | 4  | 5  | 6  |
| C09076 | 3  | 10 | 5  | 2  | 1  | 4  | 6  | 8  | 9  | 11 | 7  |
| C02122 | 5  | 11 | 1  | 3  | 9  | 2  | 8  | 6  | 4  | 7  | 10 |
| C10141 | 1  | 10 | 11 | 2  | 4  | 6  | 9  | 7  | 5  | 3  | 8  |
| C08411 | 10 | 5  | 3  | 4  | 9  | 8  | 11 | 6  | 7  | 1  | 2  |
| C08804 | 6  | 10 | 9  | 4  | 8  | 3  | 2  | 11 | 7  | 5  | 1  |
| C10025 | 10 | 3  | 5  | 11 | 2  | 8  | 9  | 1  | 4  | 6  | 7  |
| C15449 | 2  | 11 | 9  | 8  | 10 | 3  | 6  | 1  | 5  | 4  | 7  |
| C08398 | 11 | 4  | 1  | 2  | 8  | 3  | 10 | 5  | 6  | 9  | 7  |
| C11631 | 8  | 2  | 4  | 11 | 7  | 9  | 5  | 3  | 1  | 10 | 6  |
| C07642 | 11 | 10 | 9  | 4  | 2  | 5  | 1  | 8  | 3  | 7  | 6  |
| C09065 | 3  | 1  | 9  | 4  | 2  | 11 | 6  | 7  | 5  | 10 | 8  |
| C14506 | 9  | 3  | 11 | 5  | 6  | 2  | 1  | 8  | 4  | 10 | 7  |
| C07494 | 11 | 6  | 10 | 2  | 5  | 1  | 3  | 8  | 9  | 7  | 4  |
| C07559 | 5  | 10 | 3  | 8  | 1  | 7  | 2  | 11 | 4  | 9  | 6  |
| C03045 | 2  | 8  | 3  | 5  | 1  | 6  | 10 | 11 | 4  | 7  | 9  |
| C10487 | 10 | 11 | 8  | 7  | 4  | 6  | 3  | 5  | 1  | 9  | 2  |
| C04199 | 1  | 9  | 4  | 3  | 2  | 8  | 7  | 11 | 5  | 6  | 10 |
| C11154 | 11 | 8  | 4  | 2  | 5  | 9  | 3  | 10 | 1  | 6  | 7  |
| C08659 | 1  | 5  | 9  | 10 | 11 | 6  | 8  | 4  | 2  | 3  | 7  |
| C05819 | 1  | 2  | 11 | 5  | 8  | 3  | 6  | 9  | 4  | 7  | 10 |
| C09497 | 9  | 8  | 11 | 5  | 6  | 4  | 2  | 3  | 10 | 1  | 7  |
| C12098 | 5  | 11 | 8  | 1  | 3  | 2  | 7  | 10 | 9  | 4  | 6  |
| C10852 | 10 | 5  | 4  | 9  | 8  | 7  | 3  | 2  | 11 | 1  | 6  |
| C00977 | 2  | 5  | 10 | 1  | 4  | 6  | 8  | 9  | 3  | 11 | 7  |
| C14357 | 11 | 10 | 5  | 1  | 2  | 4  | 9  | 8  | 6  | 3  | 7  |
| C10671 | 3  | 7  | 9  | 4  | 10 | 11 | 6  | 1  | 5  | 8  | 2  |
| C11121 | 3  | 9  | 11 | 8  | 2  | 6  | 5  | 10 | 7  | 1  | 4  |
| C03779 | 11 | 2  | 8  | 7  | 4  | 3  | 9  | 1  | 5  | 10 | 6  |
| C14169 | 10 | 9  | 11 | 2  | 8  | 3  | 1  | 6  | 5  | 7  | 4  |
| C02779 | 1  | 8  | 2  | 10 | 7  | 9  | 6  | 3  | 5  | 4  | 11 |
| C04427 | 1  | 2  | 9  | 8  | 10 | 7  | 4  | 5  | 3  | 6  | 11 |
| C14239 | 11 | 2  | 3  | 6  | 4  | 9  | 7  | 1  | 10 | 8  | 5  |
| C06413 | 11 | 5  | 8  | 2  | 10 | 6  | 4  | 9  | 3  | 1  | 7  |

|        |    |    |    |    |    |    |    |    |    |    |    |
|--------|----|----|----|----|----|----|----|----|----|----|----|
| C10753 | 5  | 7  | 10 | 8  | 3  | 9  | 2  | 1  | 6  | 11 | 4  |
| C08244 | 10 | 1  | 6  | 7  | 2  | 8  | 3  | 5  | 4  | 11 | 9  |
| C10597 | 10 | 9  | 4  | 11 | 1  | 5  | 3  | 2  | 6  | 7  | 8  |
| C11235 | 11 | 1  | 3  | 5  | 2  | 8  | 4  | 6  | 10 | 9  | 7  |
| C07805 | 10 | 5  | 4  | 2  | 9  | 8  | 11 | 7  | 1  | 3  | 6  |
| C10789 | 10 | 8  | 5  | 7  | 9  | 2  | 1  | 3  | 6  | 4  | 11 |
| C15584 | 11 | 1  | 8  | 5  | 10 | 2  | 3  | 6  | 4  | 9  | 7  |
| C01359 | 5  | 11 | 8  | 2  | 1  | 10 | 7  | 4  | 3  | 6  | 9  |
| C03081 | 1  | 3  | 11 | 2  | 9  | 8  | 5  | 4  | 10 | 7  | 6  |
| C11233 | 11 | 2  | 4  | 10 | 9  | 5  | 3  | 1  | 8  | 6  | 7  |
| C13008 | 10 | 11 | 5  | 1  | 8  | 2  | 9  | 3  | 4  | 6  | 7  |
| C14698 | 11 | 8  | 3  | 5  | 4  | 2  | 10 | 1  | 7  | 6  | 9  |
| C09877 | 9  | 8  | 2  | 11 | 3  | 1  | 7  | 5  | 10 | 4  | 6  |
| C09537 | 9  | 8  | 5  | 7  | 6  | 4  | 3  | 1  | 11 | 2  | 10 |
| C09142 | 10 | 9  | 5  | 3  | 4  | 6  | 8  | 2  | 7  | 11 | 1  |
| C03668 | 1  | 5  | 2  | 6  | 8  | 3  | 11 | 9  | 10 | 4  | 7  |
| C08382 | 5  | 2  | 7  | 4  | 6  | 10 | 3  | 9  | 1  | 11 | 8  |
| C16245 | 1  | 2  | 4  | 7  | 5  | 10 | 8  | 11 | 9  | 3  | 6  |
| C14383 | 3  | 4  | 8  | 2  | 6  | 5  | 7  | 11 | 9  | 10 | 1  |
| C07881 | 10 | 11 | 5  | 9  | 1  | 2  | 6  | 7  | 3  | 4  | 8  |
| C15568 | 2  | 8  | 7  | 9  | 5  | 4  | 3  | 11 | 10 | 1  | 6  |
| C15736 | 10 | 1  | 4  | 8  | 7  | 3  | 6  | 9  | 5  | 11 | 2  |
| C10454 | 9  | 11 | 3  | 5  | 10 | 8  | 4  | 7  | 2  | 1  | 6  |
| C01684 | 1  | 2  | 5  | 10 | 3  | 6  | 8  | 9  | 4  | 11 | 7  |
| C07650 | 4  | 11 | 9  | 8  | 10 | 2  | 6  | 5  | 3  | 7  | 1  |
| C06685 | 3  | 10 | 1  | 5  | 9  | 6  | 4  | 2  | 11 | 8  | 7  |
| C07807 | 5  | 10 | 2  | 8  | 6  | 4  | 1  | 9  | 3  | 11 | 7  |
| C05147 | 5  | 1  | 8  | 2  | 10 | 11 | 6  | 4  | 3  | 7  | 9  |
| C01487 | 1  | 2  | 10 | 5  | 6  | 8  | 3  | 4  | 11 | 9  | 7  |
| C12229 | 10 | 3  | 6  | 9  | 4  | 1  | 11 | 2  | 7  | 5  | 8  |
| C12600 | 1  | 11 | 3  | 5  | 10 | 6  | 9  | 2  | 8  | 4  | 7  |
| C12099 | 11 | 5  | 8  | 9  | 4  | 7  | 1  | 10 | 3  | 2  | 6  |
| C10847 | 10 | 11 | 1  | 2  | 8  | 7  | 6  | 5  | 4  | 9  | 3  |
| C14321 | 11 | 9  | 5  | 8  | 3  | 2  | 6  | 10 | 4  | 1  | 7  |
| C03210 | 5  | 1  | 6  | 11 | 2  | 8  | 9  | 7  | 3  | 4  | 10 |
| C07202 | 10 | 5  | 11 | 1  | 3  | 8  | 2  | 4  | 7  | 9  | 6  |
| C01002 | 1  | 2  | 4  | 9  | 10 | 8  | 3  | 7  | 6  | 5  | 11 |
| C03001 | 5  | 8  | 6  | 2  | 10 | 11 | 7  | 3  | 4  | 1  | 9  |
| C10688 | 5  | 10 | 9  | 2  | 4  | 8  | 7  | 3  | 6  | 1  | 11 |
| C12893 | 1  | 2  | 11 | 4  | 6  | 9  | 3  | 7  | 5  | 10 | 8  |
| C14449 | 11 | 2  | 4  | 1  | 5  | 6  | 10 | 8  | 9  | 3  | 7  |
| C10074 | 9  | 10 | 7  | 5  | 4  | 11 | 2  | 3  | 1  | 8  | 6  |
| C14410 | 5  | 10 | 4  | 2  | 9  | 11 | 3  | 6  | 7  | 8  | 1  |



|        |    |    |    |    |    |    |    |    |    |    |    |
|--------|----|----|----|----|----|----|----|----|----|----|----|
| C11704 | 3  | 10 | 9  | 5  | 11 | 1  | 2  | 8  | 4  | 7  | 6  |
| C08142 | 1  | 2  | 4  | 11 | 10 | 8  | 5  | 3  | 6  | 9  | 7  |
| C02997 | 5  | 6  | 3  | 8  | 2  | 1  | 11 | 9  | 10 | 4  | 7  |
| C03354 | 5  | 1  | 11 | 6  | 10 | 2  | 4  | 8  | 3  | 9  | 7  |
| C14184 | 11 | 3  | 6  | 1  | 10 | 4  | 7  | 2  | 8  | 5  | 9  |
| C03290 | 5  | 10 | 8  | 6  | 3  | 2  | 11 | 9  | 4  | 7  | 1  |
| C09158 | 10 | 1  | 7  | 4  | 5  | 11 | 3  | 2  | 8  | 6  | 9  |
| C06115 | 1  | 4  | 2  | 8  | 9  | 10 | 5  | 6  | 7  | 11 | 3  |
| C09777 | 9  | 10 | 6  | 11 | 7  | 3  | 1  | 5  | 2  | 4  | 8  |
| C08461 | 10 | 11 | 6  | 4  | 9  | 7  | 3  | 5  | 1  | 8  | 2  |
| C07814 | 10 | 1  | 3  | 5  | 4  | 2  | 8  | 7  | 11 | 6  | 9  |
| C10811 | 10 | 8  | 6  | 11 | 9  | 7  | 2  | 3  | 1  | 5  | 4  |
| C13772 | 1  | 10 | 2  | 5  | 4  | 6  | 3  | 8  | 11 | 7  | 9  |
| C08257 | 1  | 10 | 2  | 5  | 8  | 6  | 9  | 3  | 11 | 7  | 4  |
| C01188 | 5  | 8  | 1  | 3  | 2  | 11 | 10 | 6  | 4  | 9  | 7  |
| C06420 | 5  | 6  | 8  | 10 | 2  | 1  | 11 | 4  | 9  | 3  | 7  |
| C07619 | 3  | 2  | 4  | 1  | 5  | 8  | 10 | 6  | 11 | 9  | 7  |
| C11799 | 4  | 5  | 6  | 1  | 10 | 3  | 8  | 11 | 9  | 7  | 2  |
| C09630 | 9  | 3  | 8  | 5  | 2  | 4  | 11 | 6  | 7  | 10 | 1  |
| C07259 | 4  | 3  | 10 | 5  | 2  | 1  | 6  | 8  | 7  | 9  | 11 |
| C11237 | 3  | 10 | 9  | 6  | 1  | 5  | 2  | 8  | 4  | 11 | 7  |
| C15476 | 5  | 10 | 2  | 3  | 1  | 4  | 11 | 8  | 6  | 9  | 7  |
| C09513 | 4  | 3  | 6  | 8  | 10 | 11 | 2  | 1  | 7  | 5  | 9  |
| C11114 | 11 | 10 | 5  | 1  | 2  | 4  | 7  | 3  | 9  | 8  | 6  |
| C11163 | 2  | 8  | 4  | 5  | 1  | 7  | 3  | 6  | 10 | 11 | 9  |
| C02539 | 3  | 11 | 10 | 8  | 1  | 9  | 5  | 7  | 6  | 2  | 4  |
| C08403 | 10 | 5  | 6  | 7  | 8  | 4  | 2  | 3  | 11 | 1  | 9  |
| C09883 | 2  | 11 | 10 | 7  | 8  | 4  | 5  | 3  | 6  | 9  | 1  |
| C03753 | 11 | 5  | 8  | 9  | 10 | 7  | 2  | 3  | 4  | 6  | 1  |
| C14693 | 11 | 8  | 10 | 5  | 3  | 1  | 9  | 6  | 2  | 4  | 7  |
| C07422 | 10 | 1  | 5  | 6  | 11 | 3  | 4  | 2  | 8  | 9  | 7  |
| C08492 | 9  | 11 | 1  | 5  | 3  | 6  | 7  | 2  | 10 | 4  | 8  |
| C13376 | 6  | 3  | 2  | 9  | 11 | 10 | 4  | 7  | 8  | 5  | 1  |
| C10026 | 1  | 9  | 4  | 2  | 3  | 10 | 5  | 6  | 8  | 11 | 7  |
| C07566 | 5  | 10 | 11 | 1  | 3  | 6  | 4  | 2  | 8  | 9  | 7  |
| C08866 | 11 | 6  | 10 | 3  | 1  | 4  | 8  | 2  | 9  | 7  | 5  |
| C15561 | 2  | 8  | 1  | 11 | 7  | 6  | 4  | 9  | 5  | 3  | 10 |
| C05086 | 9  | 11 | 4  | 5  | 1  | 8  | 3  | 6  | 7  | 10 | 2  |
| C09307 | 1  | 10 | 11 | 3  | 7  | 6  | 4  | 8  | 5  | 2  | 9  |
| C06840 | 10 | 9  | 6  | 11 | 2  | 5  | 3  | 8  | 4  | 7  | 1  |
| C08840 | 3  | 10 | 1  | 11 | 5  | 9  | 2  | 6  | 8  | 7  | 4  |
| C07656 | 10 | 9  | 1  | 5  | 6  | 2  | 11 | 4  | 7  | 3  | 8  |
| C11161 | 4  | 10 | 9  | 2  | 1  | 5  | 11 | 3  | 8  | 6  | 7  |

|        |    |    |    |    |    |    |    |    |    |    |    |
|--------|----|----|----|----|----|----|----|----|----|----|----|
| C11748 | 9  | 10 | 6  | 8  | 1  | 7  | 2  | 3  | 5  | 4  | 11 |
| C09776 | 10 | 11 | 8  | 5  | 6  | 2  | 9  | 3  | 4  | 1  | 7  |
| C06544 | 5  | 10 | 6  | 8  | 1  | 4  | 2  | 11 | 9  | 3  | 7  |
| C08052 | 10 | 9  | 5  | 6  | 11 | 8  | 3  | 4  | 1  | 2  | 7  |
| C02221 | 11 | 6  | 5  | 1  | 8  | 2  | 7  | 4  | 3  | 9  | 10 |
| C11485 | 11 | 6  | 1  | 2  | 7  | 4  | 9  | 3  | 10 | 8  | 5  |
| C01874 | 5  | 11 | 9  | 2  | 10 | 4  | 7  | 8  | 6  | 1  | 3  |
| C06067 | 9  | 5  | 10 | 2  | 8  | 6  | 7  | 1  | 11 | 3  | 4  |
| C10102 | 10 | 11 | 2  | 5  | 4  | 1  | 3  | 9  | 6  | 7  | 8  |
| C07406 | 10 | 11 | 9  | 5  | 2  | 7  | 4  | 1  | 3  | 8  | 6  |
| C11032 | 11 | 6  | 2  | 9  | 10 | 1  | 3  | 5  | 7  | 4  | 8  |
| C01357 | 1  | 8  | 2  | 5  | 9  | 11 | 10 | 3  | 6  | 7  | 4  |
| C12169 | 10 | 1  | 6  | 7  | 2  | 3  | 4  | 11 | 9  | 8  | 5  |
| C07996 | 10 | 6  | 9  | 1  | 8  | 7  | 3  | 2  | 5  | 11 | 4  |
| C10952 | 11 | 2  | 6  | 4  | 9  | 3  | 5  | 10 | 7  | 8  | 1  |
| C11338 | 9  | 11 | 10 | 5  | 8  | 2  | 1  | 6  | 7  | 3  | 4  |
| C08888 | 1  | 10 | 5  | 8  | 2  | 7  | 3  | 4  | 6  | 11 | 9  |
| C04840 | 2  | 8  | 5  | 4  | 1  | 11 | 6  | 3  | 7  | 9  | 10 |
| C15817 | 8  | 2  | 6  | 5  | 11 | 1  | 4  | 9  | 3  | 7  | 10 |
| C04665 | 2  | 10 | 8  | 1  | 9  | 5  | 7  | 3  | 6  | 4  | 11 |
| C16453 | 11 | 10 | 9  | 8  | 2  | 6  | 4  | 5  | 1  | 3  | 7  |
| C07636 | 10 | 9  | 5  | 4  | 1  | 11 | 3  | 7  | 2  | 8  | 6  |
| C03417 | 3  | 5  | 2  | 10 | 8  | 6  | 4  | 1  | 9  | 11 | 7  |
| C07491 | 11 | 10 | 2  | 5  | 9  | 1  | 3  | 8  | 6  | 4  | 7  |
| C13429 | 1  | 5  | 10 | 4  | 6  | 3  | 7  | 8  | 2  | 9  | 11 |
| C10605 | 5  | 1  | 4  | 3  | 2  | 11 | 6  | 10 | 8  | 7  | 9  |
| C05458 | 2  | 6  | 3  | 8  | 5  | 9  | 1  | 7  | 11 | 4  | 10 |
| C10268 | 5  | 9  | 8  | 10 | 6  | 11 | 2  | 1  | 4  | 7  | 3  |
| C07675 | 3  | 9  | 5  | 8  | 4  | 1  | 2  | 6  | 10 | 7  | 11 |
| C07421 | 10 | 11 | 1  | 4  | 2  | 3  | 8  | 5  | 6  | 9  | 7  |
| C14505 | 11 | 1  | 5  | 8  | 9  | 2  | 6  | 10 | 4  | 3  | 7  |
| C06805 | 1  | 5  | 11 | 2  | 6  | 10 | 3  | 8  | 4  | 9  | 7  |
| C08813 | 3  | 9  | 7  | 1  | 10 | 6  | 5  | 11 | 4  | 2  | 8  |
| C02710 | 5  | 10 | 3  | 6  | 1  | 8  | 9  | 2  | 11 | 4  | 7  |
| C08101 | 10 | 9  | 5  | 11 | 6  | 3  | 8  | 2  | 4  | 1  | 7  |
| C02026 | 4  | 11 | 9  | 5  | 10 | 8  | 2  | 6  | 3  | 1  | 7  |
| C10230 | 10 | 11 | 5  | 3  | 6  | 7  | 4  | 2  | 9  | 1  | 8  |
| C13709 | 4  | 10 | 5  | 2  | 6  | 8  | 9  | 1  | 7  | 11 | 3  |
| C09779 | 9  | 10 | 1  | 7  | 4  | 6  | 3  | 8  | 11 | 5  | 2  |
| C02010 | 10 | 2  | 4  | 6  | 5  | 8  | 7  | 9  | 11 | 3  | 1  |
| C01133 | 2  | 8  | 1  | 5  | 11 | 10 | 6  | 7  | 3  | 4  | 9  |
| C10840 | 5  | 2  | 6  | 7  | 10 | 9  | 1  | 3  | 8  | 4  | 11 |
| C08638 | 9  | 3  | 8  | 11 | 1  | 10 | 4  | 2  | 6  | 7  | 5  |

|        |    |    |    |    |    |    |    |    |    |    |    |
|--------|----|----|----|----|----|----|----|----|----|----|----|
| C07005 | 3  | 1  | 10 | 8  | 7  | 11 | 5  | 6  | 4  | 2  | 9  |
| C06786 | 6  | 7  | 2  | 8  | 5  | 4  | 3  | 10 | 11 | 1  | 9  |
| C03682 | 6  | 8  | 5  | 1  | 10 | 2  | 4  | 3  | 7  | 9  | 11 |
| C10037 | 10 | 1  | 4  | 5  | 9  | 11 | 2  | 3  | 8  | 6  | 7  |
| C15588 | 1  | 5  | 2  | 8  | 4  | 3  | 11 | 6  | 10 | 9  | 7  |
| C14327 | 11 | 10 | 9  | 7  | 2  | 1  | 3  | 4  | 8  | 6  | 5  |
| C10904 | 10 | 5  | 4  | 9  | 3  | 11 | 8  | 1  | 2  | 6  | 7  |
| C07898 | 5  | 10 | 2  | 6  | 11 | 1  | 3  | 9  | 8  | 4  | 7  |
| C01941 | 6  | 10 | 5  | 7  | 2  | 8  | 1  | 11 | 4  | 3  | 9  |
| C14137 | 10 | 1  | 4  | 9  | 3  | 11 | 7  | 2  | 8  | 5  | 6  |
| C03887 | 2  | 1  | 4  | 5  | 11 | 8  | 6  | 3  | 10 | 9  | 7  |
| C10039 | 10 | 5  | 3  | 2  | 7  | 11 | 1  | 4  | 9  | 6  | 8  |
| C08271 | 5  | 1  | 11 | 6  | 3  | 10 | 8  | 9  | 4  | 2  | 7  |
| C08162 | 3  | 11 | 5  | 9  | 8  | 1  | 10 | 7  | 4  | 6  | 2  |
| C07695 | 5  | 6  | 2  | 10 | 9  | 1  | 3  | 4  | 8  | 11 | 7  |
| C02803 | 11 | 8  | 3  | 5  | 4  | 1  | 2  | 7  | 9  | 10 | 6  |
| C09638 | 9  | 3  | 1  | 10 | 6  | 8  | 7  | 11 | 2  | 5  | 4  |
| C10376 | 11 | 4  | 7  | 10 | 3  | 9  | 8  | 2  | 1  | 5  | 6  |
| C09965 | 10 | 11 | 4  | 5  | 3  | 6  | 8  | 9  | 2  | 1  | 7  |
| C14273 | 1  | 3  | 11 | 9  | 5  | 4  | 8  | 6  | 10 | 7  | 2  |
| C09484 | 3  | 2  | 10 | 11 | 6  | 4  | 9  | 7  | 8  | 5  | 1  |
| C10657 | 1  | 2  | 8  | 6  | 5  | 3  | 4  | 9  | 10 | 11 | 7  |
| C12187 | 10 | 11 | 2  | 6  | 1  | 3  | 4  | 7  | 9  | 8  | 5  |
| C13784 | 5  | 3  | 2  | 10 | 6  | 11 | 8  | 7  | 1  | 9  | 4  |
| C10072 | 10 | 9  | 11 | 8  | 5  | 3  | 4  | 7  | 1  | 6  | 2  |
| C07956 | 10 | 4  | 9  | 1  | 8  | 11 | 3  | 2  | 7  | 5  | 6  |
| C01589 | 1  | 5  | 2  | 8  | 3  | 6  | 11 | 10 | 4  | 9  | 7  |
| C11310 | 5  | 6  | 11 | 10 | 2  | 1  | 8  | 9  | 3  | 4  | 7  |
| C14256 | 3  | 11 | 8  | 6  | 5  | 2  | 7  | 4  | 1  | 10 | 9  |
| C07424 | 10 | 5  | 4  | 3  | 11 | 2  | 8  | 9  | 6  | 1  | 7  |
| C02020 | 2  | 11 | 1  | 8  | 5  | 3  | 6  | 10 | 9  | 7  | 4  |
| C13711 | 6  | 1  | 5  | 10 | 9  | 7  | 3  | 8  | 2  | 11 | 4  |
| C02535 | 6  | 5  | 2  | 11 | 10 | 8  | 4  | 7  | 1  | 3  | 9  |
| C09894 | 11 | 9  | 10 | 2  | 3  | 1  | 5  | 4  | 8  | 7  | 6  |
| C12040 | 5  | 10 | 4  | 9  | 8  | 1  | 7  | 2  | 3  | 6  | 11 |
| C03510 | 5  | 6  | 2  | 1  | 8  | 4  | 10 | 9  | 11 | 7  | 3  |
| C05919 | 8  | 11 | 5  | 9  | 2  | 7  | 3  | 10 | 4  | 6  | 1  |
| C09376 | 2  | 1  | 9  | 6  | 7  | 4  | 8  | 11 | 5  | 10 | 3  |
| C07543 | 5  | 10 | 3  | 1  | 8  | 9  | 11 | 2  | 6  | 7  | 4  |
| C07405 | 5  | 6  | 10 | 2  | 8  | 11 | 3  | 4  | 1  | 9  | 7  |
| C03343 | 11 | 8  | 3  | 2  | 6  | 7  | 4  | 10 | 1  | 9  | 5  |
| C14176 | 11 | 10 | 9  | 6  | 3  | 1  | 8  | 5  | 2  | 7  | 4  |
| C14576 | 11 | 2  | 9  | 4  | 3  | 10 | 8  | 5  | 7  | 6  | 1  |

|        |    |    |    |    |    |    |    |    |    |    |    |
|--------|----|----|----|----|----|----|----|----|----|----|----|
| C09771 | 1  | 2  | 5  | 10 | 6  | 9  | 8  | 3  | 11 | 4  | 7  |
| C15910 | 9  | 1  | 10 | 3  | 8  | 6  | 4  | 5  | 2  | 11 | 7  |
| C14607 | 3  | 2  | 10 | 8  | 9  | 4  | 1  | 11 | 6  | 7  | 5  |
| C04229 | 5  | 2  | 10 | 8  | 4  | 3  | 6  | 1  | 9  | 7  | 11 |
| C10622 | 3  | 10 | 5  | 6  | 4  | 8  | 9  | 2  | 7  | 11 | 1  |
| C11224 | 10 | 4  | 5  | 9  | 8  | 2  | 3  | 7  | 6  | 1  | 11 |
| C11601 | 11 | 8  | 9  | 10 | 1  | 2  | 3  | 7  | 5  | 4  | 6  |
| C01720 | 1  | 2  | 5  | 4  | 8  | 10 | 3  | 9  | 7  | 11 | 6  |
| C02230 | 4  | 9  | 5  | 6  | 10 | 11 | 1  | 2  | 8  | 3  | 7  |
| C00837 | 10 | 1  | 9  | 2  | 4  | 7  | 6  | 5  | 3  | 8  | 11 |
| C13154 | 3  | 6  | 10 | 1  | 8  | 9  | 4  | 7  | 11 | 5  | 2  |
| C00465 | 4  | 2  | 10 | 9  | 5  | 11 | 8  | 1  | 7  | 6  | 3  |
| C13976 | 5  | 11 | 10 | 1  | 9  | 7  | 8  | 3  | 2  | 4  | 6  |
| C03108 | 1  | 3  | 4  | 2  | 7  | 9  | 8  | 6  | 10 | 5  | 11 |
| C13859 | 3  | 1  | 8  | 2  | 11 | 10 | 5  | 4  | 9  | 6  | 7  |
| C16258 | 4  | 2  | 7  | 3  | 8  | 5  | 6  | 9  | 11 | 10 | 1  |
| C03522 | 11 | 8  | 5  | 4  | 9  | 7  | 2  | 1  | 3  | 6  | 10 |
| C05457 | 2  | 3  | 8  | 6  | 9  | 1  | 4  | 5  | 11 | 7  | 10 |
| C00746 | 3  | 10 | 9  | 5  | 6  | 4  | 1  | 8  | 11 | 7  | 2  |
| C13746 | 4  | 10 | 9  | 1  | 2  | 8  | 5  | 6  | 11 | 7  | 3  |
| C08297 | 6  | 5  | 2  | 8  | 1  | 3  | 10 | 9  | 7  | 11 | 4  |
| C12042 | 5  | 6  | 8  | 9  | 11 | 10 | 7  | 2  | 3  | 4  | 1  |
| C10401 | 10 | 5  | 11 | 3  | 2  | 1  | 8  | 4  | 6  | 9  | 7  |
| C10530 | 10 | 2  | 1  | 5  | 4  | 9  | 3  | 7  | 11 | 8  | 6  |
| C09797 | 11 | 8  | 5  | 10 | 2  | 4  | 3  | 1  | 7  | 6  | 9  |
| C09558 | 10 | 11 | 2  | 5  | 9  | 8  | 7  | 6  | 3  | 1  | 4  |
| C12508 | 5  | 10 | 4  | 11 | 6  | 8  | 3  | 1  | 7  | 2  | 9  |
| C01822 | 10 | 9  | 1  | 2  | 6  | 5  | 3  | 4  | 8  | 7  | 11 |
| C02204 | 1  | 2  | 8  | 5  | 4  | 6  | 11 | 10 | 9  | 7  | 3  |
| C14489 | 3  | 9  | 5  | 2  | 8  | 11 | 6  | 7  | 1  | 4  | 10 |
| C10297 | 11 | 10 | 1  | 5  | 8  | 3  | 9  | 6  | 7  | 4  | 2  |
| C04167 | 2  | 6  | 11 | 8  | 9  | 3  | 5  | 7  | 4  | 1  | 10 |
| C08285 | 2  | 8  | 6  | 1  | 4  | 10 | 9  | 11 | 3  | 7  | 5  |
| C08255 | 1  | 2  | 8  | 7  | 5  | 6  | 10 | 11 | 3  | 4  | 9  |
| C03065 | 5  | 6  | 4  | 2  | 8  | 1  | 11 | 9  | 7  | 10 | 3  |
| C08469 | 11 | 1  | 10 | 4  | 5  | 3  | 9  | 6  | 8  | 2  | 7  |
| C15673 | 1  | 2  | 8  | 6  | 9  | 5  | 4  | 10 | 11 | 7  | 3  |
| C13973 | 10 | 9  | 1  | 11 | 6  | 5  | 7  | 8  | 3  | 2  | 4  |
| C07222 | 10 | 3  | 11 | 2  | 5  | 8  | 4  | 6  | 7  | 1  | 9  |
| C09918 | 5  | 11 | 9  | 3  | 6  | 1  | 10 | 7  | 8  | 4  | 2  |
| C08842 | 1  | 7  | 5  | 6  | 10 | 3  | 11 | 2  | 8  | 9  | 4  |
| C10988 | 11 | 3  | 10 | 9  | 5  | 2  | 6  | 8  | 4  | 1  | 7  |
| C07576 | 5  | 10 | 1  | 11 | 3  | 8  | 7  | 4  | 2  | 9  | 6  |

|        |    |    |    |    |    |    |    |    |    |    |    |
|--------|----|----|----|----|----|----|----|----|----|----|----|
| C06788 | 6  | 7  | 2  | 5  | 8  | 11 | 10 | 9  | 4  | 3  | 1  |
| C14552 | 3  | 5  | 10 | 1  | 9  | 11 | 4  | 8  | 6  | 2  | 7  |
| C09784 | 10 | 11 | 8  | 6  | 2  | 4  | 3  | 5  | 9  | 7  | 1  |
| C07664 | 9  | 10 | 5  | 8  | 11 | 6  | 1  | 2  | 3  | 7  | 4  |
| C09650 | 11 | 9  | 6  | 8  | 1  | 3  | 10 | 5  | 2  | 7  | 4  |
| C09783 | 1  | 10 | 5  | 9  | 4  | 8  | 6  | 11 | 3  | 7  | 2  |
| C06734 | 8  | 2  | 9  | 6  | 7  | 10 | 11 | 3  | 4  | 5  | 1  |
| C11003 | 11 | 2  | 9  | 4  | 7  | 10 | 8  | 6  | 3  | 5  | 1  |
| C11781 | 10 | 11 | 1  | 2  | 8  | 5  | 7  | 3  | 6  | 4  | 9  |
| C02162 | 10 | 11 | 2  | 3  | 9  | 8  | 1  | 4  | 7  | 6  | 5  |
| C10880 | 11 | 3  | 10 | 5  | 8  | 9  | 2  | 6  | 1  | 7  | 4  |
| C14430 | 11 | 10 | 9  | 2  | 7  | 4  | 3  | 5  | 6  | 8  | 1  |
| C03465 | 5  | 8  | 6  | 2  | 1  | 10 | 11 | 4  | 9  | 3  | 7  |
| C06910 | 5  | 4  | 10 | 3  | 9  | 11 | 2  | 8  | 6  | 7  | 1  |
| C08626 | 10 | 3  | 9  | 11 | 2  | 5  | 8  | 6  | 1  | 4  | 7  |
| C09255 | 5  | 11 | 2  | 3  | 9  | 6  | 1  | 4  | 8  | 7  | 10 |
| C10331 | 11 | 10 | 5  | 8  | 9  | 3  | 1  | 6  | 2  | 4  | 7  |
| C13048 | 10 | 11 | 9  | 8  | 1  | 5  | 3  | 4  | 6  | 7  | 2  |
| C07589 | 3  | 11 | 10 | 5  | 1  | 9  | 2  | 6  | 7  | 8  | 4  |
| C10562 | 10 | 5  | 8  | 3  | 2  | 1  | 11 | 9  | 6  | 4  | 7  |
| C11129 | 5  | 10 | 8  | 11 | 2  | 6  | 4  | 7  | 3  | 1  | 9  |
| C02862 | 3  | 9  | 5  | 1  | 8  | 2  | 7  | 11 | 6  | 10 | 4  |
| C07378 | 10 | 5  | 1  | 11 | 8  | 4  | 7  | 6  | 3  | 9  | 2  |
| C03486 | 4  | 3  | 5  | 2  | 9  | 1  | 7  | 6  | 11 | 8  | 10 |
| C11014 | 11 | 5  | 4  | 9  | 1  | 3  | 2  | 8  | 7  | 10 | 6  |
| C07180 | 10 | 5  | 11 | 3  | 6  | 8  | 9  | 7  | 4  | 1  | 2  |
| C10822 | 3  | 1  | 9  | 4  | 10 | 6  | 2  | 7  | 5  | 11 | 8  |
| C10340 | 11 | 8  | 2  | 1  | 5  | 4  | 10 | 3  | 7  | 6  | 9  |
| C11621 | 10 | 3  | 11 | 8  | 5  | 2  | 4  | 1  | 9  | 7  | 6  |
| C08531 | 11 | 10 | 2  | 1  | 6  | 3  | 9  | 5  | 4  | 8  | 7  |
| C03199 | 3  | 2  | 8  | 5  | 9  | 6  | 4  | 7  | 11 | 1  | 10 |
| C03500 | 11 | 9  | 1  | 5  | 3  | 6  | 10 | 7  | 2  | 8  | 4  |
| C14053 | 10 | 5  | 7  | 4  | 11 | 8  | 3  | 1  | 9  | 6  | 2  |
| C13645 | 1  | 2  | 11 | 8  | 5  | 6  | 4  | 3  | 10 | 9  | 7  |
| C08155 | 3  | 1  | 8  | 4  | 11 | 7  | 6  | 9  | 5  | 2  | 10 |
| C10565 | 10 | 6  | 1  | 9  | 5  | 2  | 7  | 3  | 11 | 8  | 4  |
| C06353 | 1  | 10 | 2  | 5  | 8  | 6  | 9  | 3  | 11 | 4  | 7  |
| C02224 | 5  | 2  | 3  | 6  | 11 | 1  | 4  | 10 | 7  | 8  | 9  |
| C14713 | 11 | 8  | 5  | 10 | 6  | 2  | 1  | 9  | 3  | 4  | 7  |
| C15559 | 2  | 4  | 7  | 3  | 8  | 5  | 11 | 1  | 9  | 10 | 6  |
| C07849 | 10 | 5  | 4  | 6  | 2  | 11 | 8  | 3  | 9  | 1  | 7  |
| C09164 | 5  | 10 | 8  | 2  | 1  | 4  | 3  | 6  | 7  | 9  | 11 |
| C10470 | 10 | 5  | 11 | 8  | 3  | 1  | 2  | 4  | 9  | 6  | 7  |

|        |    |    |    |    |    |    |    |    |    |    |    |
|--------|----|----|----|----|----|----|----|----|----|----|----|
| C13699 | 1  | 11 | 2  | 6  | 5  | 10 | 8  | 3  | 4  | 9  | 7  |
| C03365 | 1  | 10 | 2  | 5  | 8  | 6  | 9  | 3  | 11 | 7  | 4  |
| C05076 | 8  | 5  | 1  | 9  | 11 | 2  | 10 | 3  | 7  | 6  | 4  |
| C15679 | 9  | 1  | 3  | 4  | 5  | 2  | 6  | 11 | 8  | 10 | 7  |
| C10019 | 10 | 3  | 8  | 2  | 11 | 9  | 4  | 6  | 1  | 7  | 5  |
| C07620 | 11 | 3  | 10 | 2  | 1  | 4  | 6  | 5  | 8  | 7  | 9  |
| C12217 | 2  | 8  | 1  | 11 | 5  | 6  | 10 | 4  | 9  | 7  | 3  |
| C08654 | 10 | 8  | 11 | 5  | 6  | 3  | 9  | 2  | 4  | 7  | 1  |
| C10573 | 4  | 11 | 1  | 6  | 8  | 9  | 3  | 5  | 7  | 10 | 2  |
| C13863 | 1  | 8  | 2  | 5  | 10 | 4  | 3  | 7  | 9  | 6  | 11 |
| C15195 | 3  | 10 | 1  | 4  | 9  | 8  | 5  | 2  | 11 | 6  | 7  |
| C04201 | 7  | 2  | 4  | 8  | 6  | 9  | 10 | 11 | 1  | 3  | 5  |
| C09294 | 5  | 6  | 8  | 1  | 2  | 4  | 11 | 9  | 3  | 10 | 7  |
| C07608 | 10 | 5  | 9  | 2  | 8  | 6  | 11 | 1  | 4  | 7  | 3  |
| C04101 | 1  | 10 | 7  | 8  | 2  | 11 | 4  | 5  | 3  | 6  | 9  |
| C06694 | 10 | 9  | 5  | 4  | 3  | 6  | 1  | 7  | 8  | 2  | 11 |
| C03663 | 8  | 11 | 10 | 2  | 3  | 5  | 7  | 4  | 1  | 9  | 6  |
| C11042 | 11 | 8  | 5  | 1  | 6  | 2  | 3  | 4  | 9  | 7  | 10 |
| C02669 | 1  | 2  | 6  | 8  | 10 | 3  | 11 | 4  | 5  | 9  | 7  |
| C02705 | 1  | 3  | 2  | 7  | 4  | 8  | 10 | 5  | 11 | 9  | 6  |
| C05324 | 8  | 5  | 1  | 10 | 9  | 11 | 6  | 7  | 4  | 2  | 3  |
| C01670 | 10 | 5  | 11 | 6  | 4  | 1  | 3  | 2  | 9  | 7  | 8  |
| C15819 | 1  | 11 | 2  | 9  | 7  | 6  | 4  | 3  | 5  | 10 | 8  |
| C15234 | 11 | 5  | 8  | 4  | 2  | 6  | 7  | 9  | 1  | 3  | 10 |
| C13796 | 6  | 5  | 8  | 1  | 10 | 2  | 3  | 4  | 11 | 9  | 7  |
| C09744 | 8  | 10 | 9  | 1  | 3  | 4  | 2  | 11 | 5  | 7  | 6  |
| C10287 | 10 | 7  | 4  | 9  | 2  | 11 | 3  | 8  | 6  | 1  | 5  |
| C07056 | 5  | 10 | 3  | 4  | 2  | 1  | 9  | 11 | 6  | 8  | 7  |
| C03822 | 1  | 8  | 9  | 2  | 11 | 5  | 6  | 10 | 4  | 3  | 7  |
| C01744 | 5  | 10 | 11 | 8  | 2  | 9  | 1  | 3  | 6  | 7  | 4  |
| C13112 | 11 | 4  | 9  | 10 | 5  | 6  | 1  | 3  | 8  | 2  | 7  |
| C08672 | 9  | 7  | 1  | 4  | 2  | 3  | 10 | 6  | 8  | 5  | 11 |
| C06421 | 1  | 2  | 3  | 5  | 8  | 9  | 6  | 4  | 10 | 11 | 7  |
| C02640 | 5  | 10 | 2  | 9  | 6  | 1  | 8  | 3  | 7  | 4  | 11 |
| C04630 | 6  | 8  | 1  | 5  | 2  | 10 | 11 | 3  | 9  | 7  | 4  |
| C08151 | 3  | 1  | 11 | 9  | 7  | 2  | 6  | 10 | 8  | 5  | 4  |
| C07912 | 5  | 10 | 8  | 4  | 3  | 2  | 9  | 1  | 11 | 7  | 6  |
| C15311 | 6  | 5  | 8  | 9  | 4  | 1  | 3  | 11 | 7  | 10 | 2  |
| C14418 | 11 | 5  | 2  | 1  | 8  | 7  | 6  | 3  | 4  | 10 | 9  |
| C09430 | 10 | 1  | 8  | 7  | 2  | 9  | 5  | 11 | 4  | 3  | 6  |
| C01736 | 4  | 5  | 9  | 11 | 10 | 1  | 2  | 8  | 7  | 6  | 3  |
| C15364 | 3  | 2  | 10 | 5  | 11 | 8  | 6  | 7  | 1  | 9  | 4  |
| C14240 | 11 | 3  | 7  | 8  | 6  | 2  | 1  | 9  | 4  | 10 | 5  |

|        |    |    |    |    |    |    |    |    |    |    |    |
|--------|----|----|----|----|----|----|----|----|----|----|----|
| C13548 | 8  | 11 | 10 | 7  | 6  | 2  | 1  | 3  | 4  | 9  | 5  |
| C04686 | 3  | 5  | 11 | 4  | 7  | 2  | 10 | 1  | 8  | 6  | 9  |
| C01657 | 11 | 5  | 8  | 4  | 10 | 9  | 6  | 7  | 3  | 2  | 1  |
| C08211 | 3  | 8  | 2  | 7  | 9  | 4  | 1  | 5  | 11 | 6  | 10 |
| C09489 | 9  | 10 | 3  | 8  | 1  | 4  | 2  | 11 | 6  | 5  | 7  |
| C05574 | 11 | 10 | 9  | 1  | 8  | 3  | 4  | 5  | 2  | 7  | 6  |
| C01375 | 5  | 8  | 1  | 3  | 11 | 9  | 2  | 10 | 7  | 4  | 6  |
| C14564 | 11 | 7  | 6  | 4  | 1  | 10 | 5  | 3  | 2  | 9  | 8  |
| C13851 | 11 | 5  | 2  | 1  | 10 | 8  | 3  | 4  | 6  | 7  | 9  |
| C08797 | 10 | 9  | 1  | 11 | 5  | 6  | 3  | 2  | 8  | 7  | 4  |
| C03947 | 3  | 8  | 2  | 1  | 5  | 6  | 11 | 10 | 9  | 4  | 7  |
| C11822 | 2  | 5  | 6  | 8  | 3  | 4  | 1  | 10 | 11 | 7  | 9  |
| C00102 | 1  | 8  | 9  | 2  | 11 | 5  | 6  | 10 | 4  | 3  | 7  |
| C12978 | 3  | 9  | 8  | 10 | 5  | 6  | 2  | 7  | 11 | 1  | 4  |
| C07317 | 11 | 1  | 3  | 10 | 5  | 4  | 9  | 8  | 2  | 6  | 7  |
| C01444 | 2  | 1  | 5  | 4  | 11 | 6  | 8  | 3  | 7  | 9  | 10 |
| C14079 | 10 | 5  | 11 | 8  | 2  | 6  | 1  | 3  | 9  | 4  | 7  |
| C07466 | 3  | 2  | 4  | 8  | 1  | 6  | 5  | 7  | 11 | 10 | 9  |
| C10949 | 11 | 2  | 6  | 4  | 5  | 1  | 10 | 9  | 3  | 8  | 7  |
| C06539 | 10 | 5  | 11 | 4  | 2  | 9  | 6  | 1  | 3  | 8  | 7  |
| C11602 | 9  | 10 | 11 | 1  | 8  | 3  | 7  | 4  | 6  | 2  | 5  |
| C02496 | 1  | 2  | 5  | 6  | 8  | 11 | 10 | 4  | 3  | 9  | 7  |
| C09144 | 10 | 5  | 6  | 8  | 7  | 9  | 3  | 11 | 2  | 4  | 1  |
| C07913 | 5  | 8  | 6  | 11 | 1  | 4  | 3  | 10 | 7  | 9  | 2  |
| C02744 | 2  | 4  | 7  | 8  | 3  | 5  | 10 | 11 | 6  | 1  | 9  |
| C10363 | 10 | 9  | 4  | 7  | 2  | 3  | 1  | 6  | 8  | 11 | 5  |
| C04256 | 1  | 2  | 4  | 9  | 10 | 7  | 3  | 5  | 6  | 11 | 8  |
| C13907 | 2  | 5  | 1  | 9  | 8  | 6  | 4  | 3  | 11 | 7  | 10 |
| C10062 | 1  | 10 | 6  | 5  | 7  | 8  | 2  | 11 | 4  | 3  | 9  |
| C01405 | 3  | 1  | 10 | 5  | 8  | 2  | 11 | 9  | 6  | 4  | 7  |
| C14609 | 3  | 4  | 8  | 9  | 7  | 6  | 11 | 1  | 10 | 5  | 2  |
| C09025 | 10 | 5  | 8  | 1  | 2  | 4  | 11 | 3  | 6  | 7  | 9  |
| C09344 | 9  | 7  | 11 | 2  | 10 | 3  | 6  | 5  | 1  | 4  | 8  |
| C08704 | 9  | 5  | 6  | 3  | 1  | 11 | 10 | 4  | 8  | 7  | 2  |
| C06877 | 9  | 10 | 6  | 5  | 11 | 2  | 8  | 4  | 3  | 7  | 1  |
| C14486 | 3  | 5  | 9  | 6  | 2  | 1  | 11 | 4  | 10 | 8  | 7  |
| C07464 | 5  | 10 | 3  | 1  | 11 | 6  | 2  | 8  | 4  | 9  | 7  |
| C12110 | 8  | 5  | 6  | 1  | 2  | 10 | 4  | 9  | 11 | 7  | 3  |
| C09832 | 10 | 3  | 11 | 7  | 2  | 8  | 9  | 1  | 5  | 6  | 4  |
| C11318 | 10 | 11 | 5  | 1  | 2  | 8  | 4  | 3  | 6  | 9  | 7  |
| C11264 | 10 | 3  | 9  | 4  | 1  | 6  | 2  | 11 | 7  | 8  | 5  |
| C07909 | 9  | 5  | 11 | 10 | 6  | 1  | 8  | 2  | 4  | 3  | 7  |
| C08334 | 6  | 1  | 10 | 5  | 8  | 9  | 2  | 11 | 7  | 3  | 4  |

|        |    |    |    |    |    |    |    |    |    |    |    |
|--------|----|----|----|----|----|----|----|----|----|----|----|
| C14244 | 11 | 8  | 5  | 7  | 1  | 2  | 10 | 6  | 3  | 4  | 9  |
| C04203 | 11 | 2  | 8  | 6  | 5  | 10 | 1  | 9  | 4  | 3  | 7  |
| C02147 | 8  | 5  | 6  | 2  | 1  | 11 | 10 | 3  | 9  | 4  | 7  |
| C10534 | 10 | 11 | 2  | 3  | 7  | 5  | 9  | 1  | 4  | 6  | 8  |
| C04589 | 7  | 4  | 2  | 8  | 10 | 9  | 1  | 3  | 11 | 5  | 6  |
| C07655 | 4  | 10 | 11 | 8  | 3  | 6  | 7  | 2  | 5  | 1  | 9  |
| C06263 | 11 | 2  | 8  | 5  | 6  | 1  | 4  | 7  | 3  | 10 | 9  |
| C12630 | 10 | 5  | 1  | 9  | 8  | 3  | 7  | 6  | 2  | 11 | 4  |
| C02261 | 5  | 8  | 2  | 6  | 1  | 10 | 11 | 9  | 4  | 7  | 3  |
| C13192 | 2  | 5  | 4  | 1  | 6  | 10 | 3  | 7  | 8  | 11 | 9  |
| C13194 | 2  | 5  | 11 | 1  | 4  | 7  | 6  | 8  | 10 | 3  | 9  |
| C04144 | 2  | 5  | 9  | 6  | 7  | 10 | 1  | 8  | 4  | 11 | 3  |
| C13826 | 11 | 2  | 5  | 9  | 6  | 1  | 10 | 7  | 3  | 4  | 8  |
| C10274 | 10 | 11 | 9  | 5  | 6  | 2  | 3  | 7  | 8  | 4  | 1  |
| C03357 | 2  | 6  | 1  | 8  | 5  | 9  | 7  | 3  | 4  | 11 | 10 |
| C07143 | 10 | 5  | 7  | 11 | 1  | 4  | 3  | 8  | 9  | 6  | 2  |
| C00548 | 11 | 5  | 2  | 9  | 4  | 8  | 3  | 10 | 6  | 1  | 7  |
| C10221 | 10 | 11 | 1  | 5  | 3  | 4  | 9  | 7  | 6  | 8  | 2  |
| C08451 | 2  | 5  | 10 | 3  | 6  | 11 | 1  | 9  | 4  | 8  | 7  |
| C08149 | 3  | 9  | 11 | 1  | 8  | 10 | 5  | 2  | 6  | 7  | 4  |
| C03493 | 5  | 1  | 6  | 8  | 9  | 11 | 10 | 2  | 3  | 4  | 7  |
| C13691 | 5  | 10 | 2  | 4  | 1  | 9  | 11 | 3  | 6  | 7  | 8  |
| C08992 | 10 | 11 | 6  | 7  | 8  | 3  | 5  | 9  | 1  | 2  | 4  |
| C10574 | 3  | 5  | 10 | 4  | 1  | 2  | 7  | 8  | 11 | 9  | 6  |
| C11653 | 1  | 9  | 3  | 10 | 7  | 2  | 6  | 5  | 11 | 4  | 8  |
| C10371 | 10 | 11 | 2  | 6  | 3  | 9  | 7  | 5  | 1  | 4  | 8  |
| C01963 | 1  | 3  | 8  | 6  | 2  | 4  | 11 | 10 | 5  | 7  | 9  |
| C07043 | 9  | 8  | 11 | 10 | 5  | 7  | 3  | 1  | 2  | 4  | 6  |
| C10561 | 10 | 5  | 3  | 11 | 8  | 4  | 7  | 9  | 2  | 1  | 6  |
| C04544 | 2  | 4  | 6  | 9  | 8  | 1  | 10 | 7  | 5  | 3  | 11 |
| C14481 | 3  | 11 | 7  | 4  | 10 | 8  | 5  | 6  | 2  | 1  | 9  |
| C02379 | 6  | 5  | 2  | 3  | 1  | 9  | 8  | 11 | 4  | 7  | 10 |
| C02993 | 10 | 6  | 9  | 4  | 5  | 2  | 8  | 11 | 3  | 1  | 7  |
| C09926 | 10 | 11 | 6  | 1  | 2  | 5  | 4  | 3  | 9  | 7  | 8  |
| C09902 | 9  | 8  | 2  | 11 | 3  | 10 | 1  | 5  | 7  | 4  | 6  |
| C07261 | 11 | 5  | 10 | 1  | 2  | 3  | 9  | 4  | 8  | 7  | 6  |
| C14470 | 11 | 8  | 1  | 3  | 9  | 10 | 5  | 2  | 6  | 4  | 7  |
| C09249 | 10 | 5  | 6  | 9  | 8  | 3  | 4  | 11 | 2  | 7  | 1  |
| C12768 | 10 | 5  | 7  | 1  | 4  | 2  | 11 | 3  | 9  | 8  | 6  |
| C08114 | 9  | 10 | 11 | 6  | 2  | 5  | 7  | 4  | 3  | 8  | 1  |
| C06928 | 3  | 10 | 5  | 4  | 6  | 8  | 11 | 7  | 9  | 2  | 1  |
| C09866 | 1  | 10 | 6  | 9  | 4  | 8  | 7  | 3  | 11 | 5  | 2  |
| C09283 | 10 | 11 | 4  | 8  | 2  | 3  | 6  | 7  | 9  | 1  | 5  |



|        |    |    |    |    |    |    |    |    |    |    |    |
|--------|----|----|----|----|----|----|----|----|----|----|----|
| C09365 | 10 | 8  | 5  | 11 | 6  | 9  | 3  | 4  | 1  | 2  | 7  |
| C03832 | 6  | 8  | 5  | 1  | 2  | 10 | 11 | 4  | 3  | 9  | 7  |
| C09399 | 10 | 11 | 2  | 7  | 4  | 8  | 3  | 5  | 9  | 6  | 1  |
| C11360 | 10 | 11 | 5  | 3  | 9  | 8  | 2  | 6  | 4  | 1  | 7  |
| C07348 | 2  | 8  | 9  | 7  | 5  | 10 | 3  | 6  | 4  | 11 | 1  |
| C09692 | 10 | 1  | 8  | 11 | 9  | 3  | 6  | 4  | 2  | 5  | 7  |
| C06519 | 10 | 5  | 9  | 6  | 4  | 1  | 8  | 11 | 3  | 7  | 2  |
| C14136 | 3  | 11 | 10 | 8  | 1  | 4  | 9  | 6  | 7  | 2  | 5  |
| C14726 | 11 | 3  | 8  | 7  | 5  | 1  | 9  | 2  | 10 | 4  | 6  |
| C15537 | 3  | 9  | 5  | 11 | 2  | 6  | 8  | 1  | 10 | 4  | 7  |
| C10600 | 5  | 6  | 10 | 8  | 1  | 2  | 3  | 9  | 11 | 7  | 4  |
| C07487 | 11 | 8  | 10 | 5  | 3  | 2  | 1  | 6  | 9  | 7  | 4  |
| C11820 | 5  | 10 | 8  | 4  | 7  | 9  | 2  | 3  | 6  | 11 | 1  |
| C14311 | 11 | 5  | 10 | 8  | 2  | 4  | 7  | 3  | 1  | 6  | 9  |
| C07515 | 2  | 5  | 6  | 10 | 8  | 11 | 1  | 3  | 4  | 9  | 7  |
| C00845 | 2  | 8  | 4  | 9  | 3  | 10 | 5  | 1  | 6  | 7  | 11 |
| C04234 | 2  | 1  | 8  | 7  | 3  | 5  | 10 | 4  | 11 | 6  | 9  |
| C10750 | 10 | 8  | 5  | 6  | 7  | 9  | 3  | 4  | 11 | 1  | 2  |
| C08661 | 9  | 5  | 7  | 4  | 2  | 1  | 3  | 10 | 8  | 6  | 11 |
| C05342 | 4  | 5  | 9  | 8  | 11 | 7  | 3  | 6  | 1  | 10 | 2  |
| C06821 | 1  | 2  | 3  | 5  | 10 | 4  | 6  | 11 | 8  | 9  | 7  |
| C10057 | 10 | 9  | 11 | 5  | 6  | 4  | 3  | 8  | 7  | 1  | 2  |
| C01382 | 1  | 5  | 8  | 2  | 6  | 11 | 7  | 10 | 3  | 9  | 4  |
| C08670 | 9  | 10 | 2  | 1  | 4  | 6  | 8  | 3  | 11 | 5  | 7  |
| C12569 | 1  | 2  | 11 | 5  | 6  | 10 | 8  | 3  | 4  | 7  | 9  |
| C11171 | 3  | 1  | 8  | 2  | 5  | 6  | 7  | 4  | 9  | 11 | 10 |
| C11273 | 10 | 3  | 9  | 11 | 5  | 1  | 6  | 8  | 4  | 2  | 7  |
| C10725 | 10 | 11 | 4  | 6  | 8  | 1  | 3  | 7  | 5  | 9  | 2  |
| C01865 | 1  | 2  | 8  | 6  | 5  | 3  | 4  | 10 | 9  | 11 | 7  |
| C05118 | 5  | 8  | 1  | 3  | 9  | 2  | 6  | 4  | 11 | 10 | 7  |
| C09187 | 3  | 7  | 8  | 9  | 1  | 5  | 2  | 6  | 11 | 4  | 10 |
| C07106 | 5  | 10 | 1  | 11 | 2  | 6  | 9  | 7  | 4  | 8  | 3  |
| C08965 | 3  | 4  | 5  | 2  | 9  | 11 | 8  | 6  | 10 | 7  | 1  |
| C14553 | 3  | 10 | 9  | 4  | 11 | 5  | 7  | 6  | 2  | 8  | 1  |
| C08238 | 1  | 10 | 7  | 6  | 3  | 9  | 2  | 4  | 5  | 11 | 8  |
| C02052 | 1  | 2  | 10 | 3  | 11 | 8  | 9  | 7  | 5  | 4  | 6  |
| C08332 | 5  | 11 | 8  | 10 | 9  | 1  | 2  | 6  | 4  | 7  | 3  |
| C10974 | 2  | 8  | 10 | 5  | 6  | 4  | 1  | 11 | 7  | 3  | 9  |
| C12294 | 9  | 11 | 5  | 10 | 2  | 8  | 1  | 3  | 7  | 4  | 6  |
| C09931 | 1  | 4  | 5  | 6  | 2  | 11 | 10 | 3  | 8  | 9  | 7  |
| C11190 | 10 | 9  | 8  | 6  | 11 | 1  | 2  | 5  | 4  | 3  | 7  |
| C11040 | 11 | 6  | 1  | 10 | 2  | 8  | 3  | 5  | 4  | 9  | 7  |
| C00898 | 1  | 2  | 5  | 8  | 11 | 4  | 3  | 10 | 6  | 9  | 7  |

|        |    |    |    |    |    |    |    |   |    |    |    |
|--------|----|----|----|----|----|----|----|---|----|----|----|
| C03126 | 1  | 5  | 2  | 3  | 10 | 4  | 9  | 8 | 11 | 6  | 7  |
| C10398 | 11 | 3  | 10 | 8  | 5  | 2  | 1  | 6 | 7  | 4  | 9  |
| C07313 | 1  | 3  | 5  | 2  | 8  | 10 | 9  | 6 | 11 | 4  | 7  |
| C06894 | 10 | 9  | 6  | 5  | 8  | 4  | 1  | 7 | 3  | 11 | 2  |
| C06737 | 2  | 8  | 3  | 10 | 5  | 1  | 11 | 9 | 7  | 6  | 4  |
| C02657 | 6  | 5  | 2  | 11 | 1  | 9  | 3  | 8 | 4  | 10 | 7  |
| C11230 | 9  | 11 | 4  | 10 | 8  | 1  | 2  | 5 | 6  | 3  | 7  |
| C09563 | 9  | 10 | 5  | 8  | 11 | 1  | 6  | 3 | 7  | 2  | 4  |
| C09383 | 10 | 5  | 9  | 4  | 1  | 3  | 2  | 6 | 7  | 8  | 11 |

---
